# Supplementary material for: How many bee species are there? A quantitative global estimate
Source: Research Square preprint supplement (doi:10.21203/rs.3.rs-6372769/v1), 2025-06-19
Supplement: Supplementary file 1 [file DiversityLiteratureRecords.xlsx]

## Sheet: Sheet1
basisOfRecord	catalogNumber	recordNumber	locationID	family	subfamily	genus	specificEpithet	scientificName	identifiedBy	sex	individualCount	decimalLatitude	decimalLongitude	verbatimDecimalLatitude	verbatimDecimalLongitude	coordinateUncertaintyInMeters	elevationInMeters	stateOrProvince	locality	eventDate	eventTime	recordedBy	country	fieldNotes	samplingEffort	samplingProtocol	associatedTaxa	Plant ID by	Plant ID using	references	institutionCode	bibliographicCitation	typeStatus	otherCatalogNumber	day	month	year
preservedSpecimen						Acamptopoeum	fernandezi	Acamptopoeum fernandezi Gonzalez, 2004		M	1	-73.5667	5.63333				2100	Boyaca	Villa de Leyva	2001-12-31		J Rossa	Colombia							https://www.jstor.org/stable/23641796	LABUN		Holotype
preservedSpecimen						Andinopanurgus	chirosimpson	Andinopanurgus chirosimpson Packer, 2021	Laurence Packer	M	1	-65.7	-27.8				2000	Tucumán	Tafi de[l] Valle	1996-1-19		M.J. Sharkey	Argentina			sweep				https://doi.org/10.17161/jom.i101.13338	PCYU		Holotype
preservedSpecimen						Andinopanurgus	lynnae	Andinopanurgus lynnae Packer, 2021	Laurence Packer	M	1						3782	Cusco	Picol	2005-02-12		L.S. Kimsey	Peru			malaise trap				https://doi.org/10.17161/jom.i101.13338	UCDC		Holotype
preservedSpecimen						Andinopanurgus	lynnae	Andinopanurgus lynnae Packer, 2021	Laurence Packer	F	1						3782	Cusco	Picol	2005-02-12		L.S. Kimsey	Peru			malaise trap				https://doi.org/10.17161/jom.i101.13338	UCDC		Allotype
preservedSpecimen						Andinopanurgus	lynnae	Andinopanurgus lynnae Packer, 2021	Laurence Packer	F	1						3782	Cusco	Picol	2005-02-12		L.S. Kimsey	Peru			malaise trap				https://doi.org/10.17161/jom.i101.13338	UCDC		Paratype
preservedSpecimen						Andrena	abruptifovea	Andrena abruptifovea Wood, 2020		M	1	35.6989	33.6861				1772	Chouf Biosphere Reserve, Barouk trails	Mount Lebanon	2019-05-16		M Boustani	LEBANON				Thlaspi spp.			https://doi.org/10.1080/00379271.2020.1794960	RBIN		Holotype
preservedSpecimen						Andrena	abruptifovea	Andrena abruptifovea Wood, 2020		M	1	35.6989	33.6861				1772	Chouf Biosphere Reserve, Barouk trails	Mount Lebanon	2019-05-16		M Boustani	LEBANON				Thlaspi spp.			https://doi.org/10.1080/00379271.2020.1794960	RBIN		Paratype
preservedSpecimen						Andrena	abruptifovea	Andrena abruptifovea Wood, 2020		M	1	35.6989	33.6861				1772	Chouf Biosphere Reserve, Barouk trails	Mount Lebanon	2019-05-16		M Boustani	LEBANON				Thlaspi spp.			https://doi.org/10.1080/00379271.2020.1794960	RBIN		Paratype
preservedSpecimen						Andrena	abruptifovea	Andrena abruptifovea Wood, 2020		M	1	35.6989	33.6861				1772	Chouf Biosphere Reserve, Barouk trails	Mount Lebanon	2019-05-16		M Boustani	LEBANON				Thlaspi spp.			https://doi.org/10.1080/00379271.2020.1794960	RBIN		Paratype
preservedSpecimen						Andrena	abruptifovea	Andrena abruptifovea Wood, 2020		M	1	35.6989	33.6861				1772	Chouf Biosphere Reserve, Barouk trails	Mount Lebanon	2019-05-16		M Boustani	LEBANON				Thlaspi spp.			https://doi.org/10.1080/00379271.2020.1794960	RBIN		Paratype
preservedSpecimen						Andrena	abruptifovea	Andrena abruptifovea Wood, 2020		M	1	35.6989	33.6861				1772	Chouf Biosphere Reserve, Barouk trails	Mount Lebanon	2019-05-16		M Boustani	LEBANON				Thlaspi spp.			https://doi.org/10.1080/00379271.2020.1794960	RBIN		Paratype
preservedSpecimen						Andrena	abruptifovea	Andrena abruptifovea Wood, 2020		F	1	35.6989	33.6861				1772	Chouf Biosphere Reserve, Barouk trails	Mount Lebanon	2019-05-16		M Boustani	LEBANON				Thlaspi spp.			https://doi.org/10.1080/00379271.2020.1794960	TJW		Paratype
preservedSpecimen						Andrena	abruptifovea	Andrena abruptifovea Wood, 2020		M	1						1758	N Lebanon	Harrisa, Al Jawar	2019-5-11		M Boustani	LEBANON				Brassica spp.			https://doi.org/10.1080/00379271.2020.1794960	DACN		Paratype
preservedSpecimen						Andrena	abruptifovea	Andrena abruptifovea Wood, 2020		F	1						1758	N Lebanon	Harrisa, Al Jawar	2019-5-11		M Boustani	LEBANON				Brassica spp.			https://doi.org/10.1080/00379271.2020.1794960	DACN		Paratype
preservedSpecimen						Andrena	abruptifovea	Andrena abruptifovea Wood, 2020		F	1						1781	N Lebanon	Tannourine Reserve	2018-5-13		M Boustani	LEBANON				Thlaspi spp.			https://doi.org/10.1080/00379271.2020.1794960	RBIN		Paratype
preservedSpecimen						Andrena	abruptifovea	Andrena abruptifovea Wood, 2020		F	1						1754	N Lebanon	Arz Tannourine Gate area	2018-4-2		M Boustani	LEBANON							https://doi.org/10.1080/00379271.2020.1794960	TJW		Paratype
preservedSpecimen						Andrena	abruptifovea	Andrena abruptifovea Wood, 2020		F	1						1618	N Lebanon	Hadath El Jebbe, border of the Cedar forest	2017-5-5		M Boustani	LEBANON							https://doi.org/10.1080/00379271.2020.1794960	RBIN		Paratype
preservedSpecimen						Andrena	abruptifovea	Andrena abruptifovea Wood, 2020		M	1							N Lebanon	Arz Bcharre, Forest of the Cedars of God	2019-5-20		M Boustani	LEBANON				Alyssum spp.			https://doi.org/10.1080/00379271.2020.1794960	TJW		Paratype
preservedSpecimen						Andrena	abruptifovea	Andrena abruptifovea Wood, 2020		F	1								Jerusalem	1993-3-20		Abel	ISRAEL				Alyssum spp.			https://doi.org/10.1080/00379271.2020.1794960	TJW
preservedSpecimen						Andrena	abruptifovea	Andrena abruptifovea Wood, 2020		F	1								Jerusalem	1993-3-20		Abel	ISRAEL							https://doi.org/10.1080/00379271.2020.1794960	TJW
preservedSpecimen						Andrena	abruptifovea	Andrena abruptifovea Wood, 2020		F	1								Jerusalem	1993-3-20		Abel	ISRAEL							https://doi.org/10.1080/00379271.2020.1794960	TJW
preservedSpecimen						Andrena	abruptifovea	Andrena abruptifovea Wood, 2020		F	1								Al-Nasrah	2005-4-8		Jaldi	SYRIA							https://doi.org/10.1080/00379271.2020.1794960	TJW
preservedSpecimen						Andrena	abruptifovea	Andrena abruptifovea Wood, 2020		F	1								Al-Nasrah	2005-4-8		Jaldi	SYRIA							https://doi.org/10.1080/00379271.2020.1794960	TJW
preservedSpecimen						Andrena	abruptifovea	Andrena abruptifovea Wood, 2020		F	1						250	Tartus	St. Georg-Klost.	1988-4-3			SYRIA							https://doi.org/10.1080/00379271.2020.1794960	TJW
preservedSpecimen						Andrena	abruptifovea	Andrena abruptifovea Wood, 2020		M	1						300	Tartus	Safita, 10 km N	1988-4-3			SYRIA							https://doi.org/10.1080/00379271.2020.1794960	TJW
preservedSpecimen						Andrena	abruptifovea	Andrena abruptifovea Wood, 2020		M	1						300	Tartus	Safita, 10 km N	1988-4-3			SYRIA							https://doi.org/10.1080/00379271.2020.1794960	TJW
preservedSpecimen						Andrena	abruptifovea	Andrena abruptifovea Wood, 2020		F	1						300	Tartus	Safita, 10 km N	1988-4-3			SYRIA							https://doi.org/10.1080/00379271.2020.1794960	TJW
preservedSpecimen						Andrena	abruptifovea	Andrena abruptifovea Wood, 2020		F	1						500	Aleppo	Simeons-Kloster	1988-4-19			SYRIA							https://doi.org/10.1080/00379271.2020.1794960	TJW
preservedSpecimen						Andrena	abruptifovea	Andrena abruptifovea Wood, 2020		F	1						750	Latakia	Qaranjah	1988-4-3			SYRIA							https://doi.org/10.1080/00379271.2020.1794960	TJW
preservedSpecimen						Andrena	edentula	Andrena edentula Wood, 2020		M	1	36.2897	34.7936					An Nasrah env	An Nasrah env	2005-4-8		J Saki	SYRIA							https://doi.org/10.1080/00379271.2020.1794960	OOLM		Holotype
preservedSpecimen		HYMAA061-20				Andrena	scrophulariae	Andrena scrophulariae Wood, 2020		M	1	35.9319	34.2069				1754	N Lebanon	Arz Tannourine, Gate Area	2018-5-20		M Boustani	LEBANON				Scrophularia spp.			https://doi.org/10.1080/00379271.2020.1794960	RBIN		Holotype
preservedSpecimen						Andrena	scrophulariae	Andrena scrophulariae Wood, 2020		F	1	35.9319	34.2069				1754	N Lebanon	Arz Tannourine, Gate Area	2018-5-20		M Boustani	LEBANON				Scrophularia spp.			https://doi.org/10.1080/00379271.2020.1794960	RBIN		Paratype
preservedSpecimen						Andrena	scrophulariae	Andrena scrophulariae Wood, 2020		F	1	35.9319	34.2069				1754	N Lebanon	Arz Tannourine, Gate Area	2018-5-20		M Boustani	LEBANON				Scrophularia spp.			https://doi.org/10.1080/00379271.2020.1794960	TACN		Paratype
preservedSpecimen						Andrena	scrophulariae	Andrena scrophulariae Wood, 2020		F	1	35.9319	34.2069				1754	N Lebanon	Arz Tannourine, Gate Area	2018-5-20		M Boustani	LEBANON				Scrophularia spp.			https://doi.org/10.1080/00379271.2020.1794960	TJW		Paratype
preservedSpecimen						Andrena	cedricola	Andrena cedricola Wood, 2020		F	1	35.9369	34.2161				1646	N Lebanon	Hadath El Jebbe, border of the Cedar forest	2017-5-13		M Boustani	LEBANON				Brassicaceae			https://doi.org/10.1080/00379271.2020.1794960	RBIN		Holotype
preservedSpecimen						Andrena	cedricola	Andrena cedricola Wood, 2020		F	1	35.9369	34.2161				1618	N Lebanon	Hadath El Jebbe, border of the Cedar forest	2017-5-5		M Boustani	LEBANON							https://doi.org/10.1080/00379271.2020.1794960	TJW		Paratype
preservedSpecimen						Andrena	cedricola	Andrena cedricola Wood, 2020		M	1						1618	N Lebanon	Hadath El Jebbe, border of the Cedar forest	2017-5-5		M Boustani	LEBANON							https://doi.org/10.1080/00379271.2020.1794960	RBIN		Paratype
preservedSpecimen						Andrena	cedricola	Andrena cedricola Wood, 2020		F	1						1480	Mount Lebanon	Falougha, Cedar woods	2019-4-27		M Boustani	LEBANON							https://doi.org/10.1080/00379271.2020.1794960	DACN		Paratype
preservedSpecimen						Andrena	cedricola	Andrena cedricola Wood, 2020		F	1						1657	Mount Lebanon	Laqlouq, Matoube	2017-4-30		M Boustani	LEBANON							https://doi.org/10.1080/00379271.2020.1794960	TJW		Paratype
preservedSpecimen						Andrena	cedricola	Andrena cedricola Wood, 2020		M	1						1758	N Lebanon	Harrisa, Al Jawar	2019-5-11		M Boustani	LEBANON				white Brassica			https://doi.org/10.1080/00379271.2020.1794960	DACN		Paratype
preservedSpecimen						Andrena	cedricola	Andrena cedricola Wood, 2020		M	1						1758	N Lebanon	Harrisa, Al Jawar	2019-5-11		M Boustani	LEBANON				white Brassica			https://doi.org/10.1080/00379271.2020.1794960	RBIN		Paratype
preservedSpecimen						Andrena	cedricola	Andrena cedricola Wood, 2020		M	1							Mount Lebanon	Faouar [probably Camp Faouar UNDOF, Golan Heights, c. 1000 m – it is not clear exactly where this sampling point is, and the author may have been at a higher altitude towards Mount Hermon]	2001-3-31		J Plass	SYRIA							https://doi.org/10.1080/00379271.2020.1794960	OOLM		Paratype
preservedSpecimen						Andrena	parvispinae	Andrena parvispinae Wood, 2020		M	1	35.9	35.783				750		Latakia, Qaranjah	1988-4-3			SYRIA							https://doi.org/10.1080/00379271.2020.1794960	OOLM		Holotype
preservedSpecimen						Andrena	parvispinae	Andrena parvispinae Wood, 2020		M	1	35.9	35.783				750		Latakia, Qaranjah	1988-4-3			SYRIA							https://doi.org/10.1080/00379271.2020.1794960	OOLM		Paratype
preservedSpecimen						Andrena	parvispinae	Andrena parvispinae Wood, 2020		M	1	35.9	35.783				750		Latakia, Qaranjah	1988-4-3			SYRIA							https://doi.org/10.1080/00379271.2020.1794960	OOLM		Paratype
preservedSpecimen						Andrena	parvispinae	Andrena parvispinae Wood, 2020		M	1	35.9	35.783				750		Latakia, Qaranjah	1988-4-3			SYRIA							https://doi.org/10.1080/00379271.2020.1794960	OOLM		Paratype
preservedSpecimen						Andrena	parvispinae	Andrena parvispinae Wood, 2020		M	1	35.9	35.783				750		Latakia, Qaranjah	1988-4-3			SYRIA							https://doi.org/10.1080/00379271.2020.1794960	OOLM		Paratype
preservedSpecimen						Andrena	parvispinae	Andrena parvispinae Wood, 2020		M	1	35.9	35.783				750		Latakia, Qaranjah	1988-4-3			SYRIA							https://doi.org/10.1080/00379271.2020.1794960	OOLM		Paratype
preservedSpecimen						Andrena	parvispinae	Andrena parvispinae Wood, 2020		M	1	35.9	35.783				300		Tartus, Safita, 10 km E; probably Alhulu west forests	1988-4-3			SYRIA							https://doi.org/10.1080/00379271.2020.1794960	TJM		Paratype
preservedSpecimen						Andrena	prodigiosa	Andrena prodigiosa Wood, 2020		M	1	35.7078	33.5658						Beka’a, Qaraoun Lake	2013-3-24		M. Kasparek	LEBANON							https://doi.org/10.1080/00379271.2020.1794960	OOLM		Holotype
preservedSpecimen						Chilicola	capillitas	Chilicola capillitas Packer and Dumesh, 2019		M	1						3000	Catamarca	Cuesta Minas Capillitas	1973-12-30		JL Neff	ARGENTINA				Senecio L			https://doi.org/10.11646/zootaxa.4559.1.1	CTMI		Holotype
preservedSpecimen		79659				Chilicola	capillitas	Chilicola capillitas Packer and Dumesh, 2019		M	1						3000	Catamarca	Cuesta Minas Capillitas	1973-2-18		JL Neff	ARGENTINA				Stevia Cav. (Asteraceae)			https://doi.org/10.11646/zootaxa.4559.1.1	CTMI		Paratype
preservedSpecimen		79660				Chilicola	capillitas	Chilicola capillitas Packer and Dumesh, 2019		M	1						3000	Catamarca	Cuesta Minas Capillitas	1973-2-18		JL Neff	ARGENTINA							https://doi.org/10.11646/zootaxa.4559.1.1	CTMI		Paratype
preservedSpecimen		78557				Chilicola	capillitas	Chilicola capillitas Packer and Dumesh, 2019		F	1						3000	Catamarca	Cuesta Minas Capillitas	1973-1-28		JL Neff	ARGENTINA							https://doi.org/10.11646/zootaxa.4559.1.1	PCYU		Paratype
preservedSpecimen		78557				Chilicola	capillitas	Chilicola capillitas Packer and Dumesh, 2019		F	2						3000	Catamarca	Cuesta Minas Capillitas	1973-1-28		JL Neff	ARGENTINA							https://doi.org/10.11646/zootaxa.4559.1.1	CTMI		Paratype
preservedSpecimen						Chilicola	capillitas	Chilicola capillitas Packer and Dumesh, 2019		M	1						2400	Tucumán	Tafi	1986-2		M Fritz	ARGENTINA							https://doi.org/10.11646/zootaxa.4559.1.1	AMNH		Paratype
preservedSpecimen						Chilicola	capillitas	Chilicola capillitas Packer and Dumesh, 2019		M	1						1855	La Rioja	Jagüe	2003-12-13		L. Stange, P. Fidalgo	ARGENTINA							https://doi.org/10.11646/zootaxa.4559.1.1	FLAST		Paratype
preservedSpecimen						Chilicola	capillitas	Chilicola capillitas Packer and Dumesh, 2019		M	1						1855	La Rioja	Jagüe	2003-12-13		L. Stange, P. Fidalgo	ARGENTINA							https://doi.org/10.11646/zootaxa.4559.1.1	FLAST		Paratype
preservedSpecimen	SM0522554 KUNHM–ENT					Chilicola	ashei	Chilicola ashei Dumesh and Packer, 2019		M	1	-16.3047	-67.9631				3350	La Paz	Chuspipata Junction	2001-1-2		J.S. Ashe, R.S. Hanley colls	BOLIVIA							https://doi.org/10.11646/zootaxa.4559.1.1	SEMC		Holotype
preservedSpecimen	LACM GUI— ENT 240111					Chilicola	goloboffi	Chilicola goloboffi Packer and Dumesh, 2019		M	1							Jujuy	Tumbaya	1948-1-24		Monrós & Willink	ARGENTINA							https://doi.org/10.11646/zootaxa.4559.1.1	LACM		Holotype
preservedSpecimen						Chilicola	goloboffi	Chilicola goloboffi Packer and Dumesh, 2019		F	1							Salta	El Alisal	1991-4		M Fritz	ARGENTINA							https://doi.org/10.11646/zootaxa.4559.1.1	AMNH		Paratype
preservedSpecimen						Chilicola	fritzi	Chilicola fritzi Packer and Dumesh, 2019		M	1							Salta	El Alisal	1994-1		M Fritz	ARGENTINA							https://doi.org/10.11646/zootaxa.4559.1.1	AMNH		Holotype
preservedSpecimen						Chilicola	boharti	Chilicola boharti Packer and Dumesh, 2019		M	1								La Paz	1972-2-6		GE Bohart	BOLIVIA							https://doi.org/10.11646/zootaxa.4559.1.1	LOGAN		Holotype
preservedSpecimen						Chilicola	boharti	Chilicola boharti Packer and Dumesh, 2019		M	1								La Paz	1972-2-6		GE Bohart	BOLIVIA							https://doi.org/10.11646/zootaxa.4559.1.1	LOGAN		Paratype
preservedSpecimen						Chilicola	boharti	Chilicola boharti Packer and Dumesh, 2019		M	1								La Paz	1972-2-6		GE Bohart	BOLIVIA							https://doi.org/10.11646/zootaxa.4559.1.1	LOGAN		Paratype
preservedSpecimen						Chilicola	boharti	Chilicola boharti Packer and Dumesh, 2019		M	1								La Paz	1972-2-6		GE Bohart	BOLIVIA							https://doi.org/10.11646/zootaxa.4559.1.1	LOGAN		Paratype
preservedSpecimen						Chilicola	boharti	Chilicola boharti Packer and Dumesh, 2019		M	1								La Paz	1972-2-6		GE Bohart	BOLIVIA							https://doi.org/10.11646/zootaxa.4559.1.1	LOGAN		Paratype
preservedSpecimen						Chilicola	boharti	Chilicola boharti Packer and Dumesh, 2019		M	1								La Paz	1972-2-6		GE Bohart	BOLIVIA							https://doi.org/10.11646/zootaxa.4559.1.1	LOGAN		Paratype
preservedSpecimen						Chilicola	boharti	Chilicola boharti Packer and Dumesh, 2019		M	1								La Paz	1972-2-6		GE Bohart	BOLIVIA							https://doi.org/10.11646/zootaxa.4559.1.1	LOGAN		Paratype
preservedSpecimen						Chilicola	boharti	Chilicola boharti Packer and Dumesh, 2019		M	1								La Paz	1972-2-6		GE Bohart	BOLIVIA							https://doi.org/10.11646/zootaxa.4559.1.1	LOGAN		Paratype
preservedSpecimen						Chilicola	boharti	Chilicola boharti Packer and Dumesh, 2019		M	1								La Paz	1972-2-6		GE Bohart	BOLIVIA							https://doi.org/10.11646/zootaxa.4559.1.1	PCYU		Paratype
preservedSpecimen						Chilicola	pustulata	Chilicola pustulata Packer and Dumesh, 2019		M	1							Cusco Departamento	Cuzco	1965-11-24		H. & M. Townes	PERU							https://doi.org/10.11646/zootaxa.4559.1.1	AEI		Holotype
preservedSpecimen						Chilicola	pustulata	Chilicola pustulata Packer and Dumesh, 2019		M	1							Cusco Departamento	Cuzco	1965-11-24		H. & M. Townes	PERU							https://doi.org/10.11646/zootaxa.4559.1.1	AEI		Paratype
preservedSpecimen						Chilicola	pustulata	Chilicola pustulata Packer and Dumesh, 2019		M	1							Cusco Departamento	Cuzco	1965-11-24		H. & M. Townes	PERU							https://doi.org/10.11646/zootaxa.4559.1.1	AEI		Paratype
preservedSpecimen						Chilicola	pustulata	Chilicola pustulata Packer and Dumesh, 2019		M	1							Cusco Departamento	Cuzco	1965-11-24		H. & M. Townes	PERU							https://doi.org/10.11646/zootaxa.4559.1.1	AEI		Paratype
preservedSpecimen						Chilicola	carpenteri	Chilicola carpenteri Packer and Dumesh, 2019		M	1	-24.0185	-65.4098	24.0185°S	65.4098°W		1716	Jujuy	Jujuy, 27km N	2003-10-27		M.E. Irwin & F.D. Parker	ARGENTINA	27.x–14.xi.2003		malaise trap				https://doi.org/10.11646/zootaxa.4559.1.1	LOGAN		Holotype
preservedSpecimen						Chilicola	carpenteri	Chilicola carpenteri Packer and Dumesh, 2019		M	1	-24.0185	-65.4098	24.0185°S	65.4098°W		1716	Jujuy	Jujuy, 27km N	2003-10-27		M.E. Irwin & F.D. Parker	ARGENTINA	27.x–14.xi.2003		malaise trap				https://doi.org/10.11646/zootaxa.4559.1.1	LOGAN		Paratype
preservedSpecimen						Chilicola	carpenteri	Chilicola carpenteri Packer and Dumesh, 2019		M	1	-24.0185	-65.4098	24.0185°S	65.4098°W		1716	Jujuy	Jujuy, 27km N	2003-10-27		M.E. Irwin & F.D. Parker	ARGENTINA	27.x–14.xi.2003		malaise trap				https://doi.org/10.11646/zootaxa.4559.1.1	LOGAN		Paratype
preservedSpecimen						Chilicola	carpenteri	Chilicola carpenteri Packer and Dumesh, 2019		M	1	-24.0185	-65.4098	24.0185°S	65.4098°W		1716	Jujuy	Jujuy, 27km N	2003-10-27		M.E. Irwin & F.D. Parker	ARGENTINA	27.x–14.xi.2003		malaise trap				https://doi.org/10.11646/zootaxa.4559.1.1	LOGAN		Paratype
preservedSpecimen						Chilicola	carpenteri	Chilicola carpenteri Packer and Dumesh, 2019		M	1	-24.0185	-65.4098	24.0185°S	65.4098°W		1716	Jujuy	Jujuy, 27km N	2003-10-27		M.E. Irwin & F.D. Parker	ARGENTINA	27.x–14.xi.2003		malaise trap				https://doi.org/10.11646/zootaxa.4559.1.1	LOGAN		Paratype
preservedSpecimen						Chilicola	carpenteri	Chilicola carpenteri Packer and Dumesh, 2019		M	1	-24.0185	-65.4098	24.0185°S	65.4098°W		1716	Jujuy	Jujuy, 27km N	2003-10-27		M.E. Irwin & F.D. Parker	ARGENTINA	27.x–14.xi.2003		malaise trap				https://doi.org/10.11646/zootaxa.4559.1.1	LOGAN		Paratype
preservedSpecimen						Chilicola	carpenteri	Chilicola carpenteri Packer and Dumesh, 2019		M	1	-24.0185	-65.4098	24.0185°S	65.4098°W		1716	Jujuy	Jujuy, 27km N	2003-10-27		M.E. Irwin & F.D. Parker	ARGENTINA	27.x–14.xi.2003		malaise trap				https://doi.org/10.11646/zootaxa.4559.1.1	LOGAN		Paratype
preservedSpecimen						Chilicola	carpenteri	Chilicola carpenteri Packer and Dumesh, 2019		M	1	-24.0185	-65.4098	24.0185°S	65.4098°W		1716	Jujuy	Jujuy, 27km N	2003-10-27		M.E. Irwin & F.D. Parker	ARGENTINA	27.x–14.xi.2003		malaise trap				https://doi.org/10.11646/zootaxa.4559.1.1	LOGAN		Paratype
preservedSpecimen						Chilicola	carpenteri	Chilicola carpenteri Packer and Dumesh, 2019		M	1	-24.0185	-65.4098	24.0185°S	65.4098°W		1716	Jujuy	Jujuy, 27km N	2003-10-27		M.E. Irwin & F.D. Parker	ARGENTINA	27.x–14.xi.2003		malaise trap				https://doi.org/10.11646/zootaxa.4559.1.1	LOGAN		Paratype
preservedSpecimen						Chilicola	carpenteri	Chilicola carpenteri Packer and Dumesh, 2019		F	1	-24.0185	-65.4098	24.0185°S	65.4098°W		1716	Jujuy	Jujuy, 27km N	2003-10-27		M.E. Irwin & F.D. Parker	ARGENTINA	27.x–14.xi.2003		malaise trap				https://doi.org/10.11646/zootaxa.4559.1.1	LOGAN		Paratype
preservedSpecimen						Chilicola	carpenteri	Chilicola carpenteri Packer and Dumesh, 2019		F	1	-24.0185	-65.4098	24.0185°S	65.4098°W		1716	Jujuy	Jujuy, 27km N	2003-10-27		M.E. Irwin & F.D. Parker	ARGENTINA	27.x–14.xi.2003		malaise trap				https://doi.org/10.11646/zootaxa.4559.1.1	LOGAN		Paratype
preservedSpecimen						Chilicola	carpenteri	Chilicola carpenteri Packer and Dumesh, 2019		M	1	-24.8897	-65.6828	24°53'23.0"S	65°40'58.0"W		1720	Salta	N. Campo Quiaje	1994-10-19		James M. Carpenter	ARGENTINA							https://doi.org/10.11646/zootaxa.4559.1.1	AMNH		Paratype
preservedSpecimen						Chilicola	carpenteri	Chilicola carpenteri Packer and Dumesh, 2019		M	1	-24.8897	-65.6828	24°53'23.0"S	65°40'58.0"W		1720	Salta	N. Campo Quiaje	1994-10-19		James M. Carpenter	ARGENTINA							https://doi.org/10.11646/zootaxa.4559.1.1	AMNH		Paratype
preservedSpecimen						Chilicola	roigi	Chilicola roigi Packer and Dumesh, 2019		M	1						1700	Salta	Quebrada Escoipe	1992-7-29		A. Roig Alsina	ARGENTINA							https://doi.org/10.11646/zootaxa.4559.1.1	MACN		Holotype
preservedSpecimen						Chilicola	roigi	Chilicola roigi Packer and Dumesh, 2019		F	1							Salta	Chorrillos	1993-3		M. Fritz	ARGENTINA							https://doi.org/10.11646/zootaxa.4559.1.1	AMNH		Paratype
preservedSpecimen						Chilicola	roigi	Chilicola roigi Packer and Dumesh, 2019		M	1							Salta	El Maray	1994-2		M. Fritz	ARGENTINA							https://doi.org/10.11646/zootaxa.4559.1.1	PCYU		Paratype
preservedSpecimen						Chilicola	roigi	Chilicola roigi Packer and Dumesh, 2019		M	1							Salta	El Alisal	1993-12		M. Fritz	ARGENTINA							https://doi.org/10.11646/zootaxa.4559.1.1	AMNH		Paratype
preservedSpecimen						Chilicola	calchaqui	Chilicola calchaqui Packer and Dumesh, 2019		F	1						2400	Tucumán	Tafi	1986-2		M. Fritz	ARGENTINA							https://doi.org/10.11646/zootaxa.4559.1.1	AMNH		Holotype
preservedSpecimen						Chilicola	jaguense	Chilicola jaguense Packer and Dumesh, 2019		F	1							La Rioja	Jagüe	1970-3-9		C. Porter & L. Stange	ARGENTINA							https://doi.org/10.11646/zootaxa.4559.1.1	IML		Holotype
preservedSpecimen		17FJ1				Lasioglossum		Lasioglossum fijiense (Perkins and Cheesman, 1928)			1	-18.2006	178.001				285		Viti_Levu	2017-04-14	09:30:00		Fiji							http://dx.doi.org/10.1098/rspb.2020.0045	SAMA
preservedSpecimen		17FJ100				Lasioglossum		Lasioglossum ostridorsum (Dorey, Schwarz and Stevens, 2019)			1	-17.6153	178.017				1289		Viti_Levu	2017-04-18	12:31:00		Fiji							http://dx.doi.org/10.1098/rspb.2020.0045	SAMA
preservedSpecimen		17FJ101				Lasioglossum		Lasioglossum ostridorsum (Dorey, Schwarz and Stevens, 2019)			1	-17.6153	178.017				1289		Viti_Levu	2017-04-18	12:31:00		Fiji							http://dx.doi.org/10.1098/rspb.2020.0045	SAMA
preservedSpecimen		17FJ103				Lasioglossum		Lasioglossum ostridorsum (Dorey, Schwarz and Stevens, 2019)			1	-17.6153	178.017				1289		Viti_Levu	2017-04-18	12:31:00		Fiji							http://dx.doi.org/10.1098/rspb.2020.0045	SAMA
preservedSpecimen		17FJ104				Lasioglossum		Lasioglossum ostridorsum (Dorey, Schwarz and Stevens, 2019)			1	-17.6153	178.017				1289		Viti_Levu	2017-04-18	12:31:00		Fiji							http://dx.doi.org/10.1098/rspb.2020.0045	SAMA
preservedSpecimen		17FJ105				Lasioglossum		Lasioglossum atritergus (Dorey, Schwarz and Stevens, 2019)			1	-17.6153	178.017				1289		Viti_Levu	2017-04-18	12:31:00		Fiji							http://dx.doi.org/10.1098/rspb.2020.0045	SAMA
preservedSpecimen		17FJ106				Lasioglossum		Lasioglossum ostridorsum (Dorey, Schwarz and Stevens, 2019)			1	-17.6153	178.017				1289		Viti_Levu	2017-04-18	12:31:00		Fiji							http://dx.doi.org/10.1098/rspb.2020.0045	SAMA
preservedSpecimen		17FJ107				Lasioglossum		Lasioglossum ostridorsum (Dorey, Schwarz and Stevens, 2019)			1	-17.6153	178.017				1289		Viti_Levu	2017-04-18	12:31:00		Fiji							http://dx.doi.org/10.1098/rspb.2020.0045	SAMA
preservedSpecimen		17FJ108				Lasioglossum		Lasioglossum ostridorsum (Dorey, Schwarz and Stevens, 2019)			1	-17.6153	178.017				1289		Viti_Levu	2017-04-18	12:31:00		Fiji							http://dx.doi.org/10.1098/rspb.2020.0045	SAMA
preservedSpecimen		17FJ109				Lasioglossum		Lasioglossum ostridorsum (Dorey, Schwarz and Stevens, 2019)			1	-17.6153	178.017				1289		Viti_Levu	2017-04-18	12:31:00		Fiji							http://dx.doi.org/10.1098/rspb.2020.0045	SAMA
preservedSpecimen		17FJ11				Lasioglossum		Lasioglossum atritergus (Dorey, Schwarz and Stevens, 2019)			1	-18.1379	178.031				200		Viti_Levu	2017-04-14	10:42:00		Fiji							http://dx.doi.org/10.1098/rspb.2020.0045	SAMA
preservedSpecimen		17FJ110				Lasioglossum		Lasioglossum ostridorsum (Dorey, Schwarz and Stevens, 2019)			1	-17.6153	178.017				1289		Viti_Levu	2017-04-18	12:31:00		Fiji							http://dx.doi.org/10.1098/rspb.2020.0045	SAMA
preservedSpecimen		17FJ111				Lasioglossum		Lasioglossum ostridorsum (Dorey, Schwarz and Stevens, 2019)			1	-17.6153	178.017				1289		Viti_Levu	2017-04-18	12:31:00		Fiji							http://dx.doi.org/10.1098/rspb.2020.0045	SAMA
preservedSpecimen		17FJ112				Lasioglossum		Lasioglossum ostridorsum (Dorey, Schwarz and Stevens, 2019)			1	-17.6153	178.017				1289		Viti_Levu	2017-04-18	12:31:00		Fiji							http://dx.doi.org/10.1098/rspb.2020.0045	SAMA
preservedSpecimen		17FJ113				Lasioglossum		Lasioglossum ostridorsum (Dorey, Schwarz and Stevens, 2019)			1	-17.6166	178.017				1303		Viti_Levu	2017-04-18	13:45:00		Fiji							http://dx.doi.org/10.1098/rspb.2020.0045	SAMA
preservedSpecimen		17FJ114				Lasioglossum		Lasioglossum ostridorsum (Dorey, Schwarz and Stevens, 2019)			1	-17.6166	178.017				1303		Viti_Levu	2017-04-18	13:45:00		Fiji							http://dx.doi.org/10.1098/rspb.2020.0045	SAMA
preservedSpecimen		17FJ115				Lasioglossum		Lasioglossum ostridorsum (Dorey, Schwarz and Stevens, 2019)			1	-17.6166	178.017				1303		Viti_Levu	2017-04-18	13:45:00		Fiji							http://dx.doi.org/10.1098/rspb.2020.0045	SAMA
preservedSpecimen		17FJ117				Lasioglossum		Lasioglossum ostridorsum (Dorey, Schwarz and Stevens, 2019)			1	-17.6166	178.017				1303		Viti_Levu	2017-04-18	13:45:00		Fiji							http://dx.doi.org/10.1098/rspb.2020.0045	SAMA
preservedSpecimen		17FJ118				Lasioglossum		Lasioglossum ostridorsum (Dorey, Schwarz and Stevens, 2019)			1	-17.6166	178.017				1303		Viti_Levu	2017-04-18	13:45:00		Fiji							http://dx.doi.org/10.1098/rspb.2020.0045	SAMA
preservedSpecimen		17FJ119				Lasioglossum		Lasioglossum ostridorsum (Dorey, Schwarz and Stevens, 2019)			1	-17.6166	178.017				1303		Viti_Levu	2017-04-18	13:45:00		Fiji							http://dx.doi.org/10.1098/rspb.2020.0045	SAMA
preservedSpecimen		17FJ12				Lasioglossum		Lasioglossum fijiense (Perkins and Cheesman, 1928)			1	-18.1188	178.032				203		Viti_Levu	2017-04-14	11:20:00		Fiji							http://dx.doi.org/10.1098/rspb.2020.0045	SAMA
preservedSpecimen		17FJ120				Lasioglossum		Lasioglossum ostridorsum (Dorey, Schwarz and Stevens, 2019)			1	-17.6166	178.017				1303		Viti_Levu	2017-04-18	13:45:00		Fiji							http://dx.doi.org/10.1098/rspb.2020.0045	SAMA
preservedSpecimen		17FJ121				Lasioglossum		Lasioglossum ostridorsum (Dorey, Schwarz and Stevens, 2019)			1	-17.6166	178.017				1303		Viti_Levu	2017-04-18	13:45:00		Fiji							http://dx.doi.org/10.1098/rspb.2020.0045	SAMA
preservedSpecimen		17FJ122				Lasioglossum		Lasioglossum ostridorsum (Dorey, Schwarz and Stevens, 2019)			1	-17.6166	178.017				1303		Viti_Levu	2017-04-18	13:45:00		Fiji							http://dx.doi.org/10.1098/rspb.2020.0045	SAMA
preservedSpecimen		17FJ123				Lasioglossum		Lasioglossum Species F			1	-17.6178	178.013				1089		Viti_Levu	2017-04-18	14:57:00		Fiji							http://dx.doi.org/10.1098/rspb.2020.0045	SAMA
preservedSpecimen		17FJ124				Lasioglossum		Lasioglossum ostridorsum (Dorey, Schwarz and Stevens, 2019)			1	-17.6148	178.018				1328		Viti_Levu	2017-04-17	10:45:00		Fiji							http://dx.doi.org/10.1098/rspb.2020.0045	SAMA
preservedSpecimen		17FJ125				Lasioglossum		Lasioglossum atritergus (Dorey, Schwarz and Stevens, 2019)			1	-17.6148	178.018				1328		Viti_Levu	2017-04-17	10:45:00		Fiji							http://dx.doi.org/10.1098/rspb.2020.0045	SAMA
preservedSpecimen		17FJ126				Lasioglossum		Lasioglossum atritergus (Dorey, Schwarz and Stevens, 2019)			1	-17.6148	178.018				1328		Viti_Levu	2017-04-17	10:45:00		Fiji							http://dx.doi.org/10.1098/rspb.2020.0045	SAMA
preservedSpecimen		17FJ127				Lasioglossum		Lasioglossum atritergus (Dorey, Schwarz and Stevens, 2019)			1	-17.6148	178.018				1328		Viti_Levu	2017-04-17	10:45:00		Fiji							http://dx.doi.org/10.1098/rspb.2020.0045	SAMA
preservedSpecimen		17FJ128				Lasioglossum		Lasioglossum ostridorsum (Dorey, Schwarz and Stevens, 2019)			1	-17.6148	178.018				1328		Viti_Levu	2017-04-17	10:45:00		Fiji							http://dx.doi.org/10.1098/rspb.2020.0045	SAMA
preservedSpecimen		17FJ129				Lasioglossum		Lasioglossum atritergus (Dorey, Schwarz and Stevens, 2019)			1	-17.6148	178.018				1328		Viti_Levu	2017-04-17	10:45:00		Fiji							http://dx.doi.org/10.1098/rspb.2020.0045	SAMA
preservedSpecimen		17FJ13				Lasioglossum		Lasioglossum atritergus (Dorey, Schwarz and Stevens, 2019)			1	-17.7359	178.074				715		Viti_Levu	2017-04-17	11:15:00		Fiji							http://dx.doi.org/10.1098/rspb.2020.0045	SAMA
preservedSpecimen		17FJ130				Lasioglossum		Lasioglossum ostridorsum (Dorey, Schwarz and Stevens, 2019)			1	-17.6148	178.018				1328		Viti_Levu	2017-04-17	10:45:00		Fiji							http://dx.doi.org/10.1098/rspb.2020.0045	SAMA
preservedSpecimen		17FJ131				Lasioglossum		Lasioglossum ostridorsum (Dorey, Schwarz and Stevens, 2019)			1	-17.6148	178.018				1328		Viti_Levu	2017-04-17	10:45:00		Fiji							http://dx.doi.org/10.1098/rspb.2020.0045	SAMA
preservedSpecimen		17FJ132				Lasioglossum		Lasioglossum ostridorsum (Dorey, Schwarz and Stevens, 2019)			1	-17.6148	178.018				1328		Viti_Levu	2017-04-17	10:45:00		Fiji							http://dx.doi.org/10.1098/rspb.2020.0045	SAMA
preservedSpecimen		17FJ133				Lasioglossum		Lasioglossum atritergus (Dorey, Schwarz and Stevens, 2019)			1	-17.6148	178.018				1328		Viti_Levu	2017-04-17	10:45:00		Fiji							http://dx.doi.org/10.1098/rspb.2020.0045	SAMA
preservedSpecimen		17FJ134				Lasioglossum		Lasioglossum atritergus (Dorey, Schwarz and Stevens, 2019)			1	-17.6148	178.018				1328		Viti_Levu	2017-04-17	10:45:00		Fiji							http://dx.doi.org/10.1098/rspb.2020.0045	SAMA
preservedSpecimen		17FJ135				Lasioglossum		Lasioglossum atritergus (Dorey, Schwarz and Stevens, 2019)			1	-17.6148	178.018				1328		Viti_Levu	2017-04-17	10:45:00		Fiji							http://dx.doi.org/10.1098/rspb.2020.0045	SAMA
preservedSpecimen		17FJ136				Lasioglossum		Lasioglossum ostridorsum (Dorey, Schwarz and Stevens, 2019)			1	-17.6148	178.018				1328		Viti_Levu	2017-04-17	10:45:00		Fiji							http://dx.doi.org/10.1098/rspb.2020.0045	SAMA
preservedSpecimen		17FJ137				Lasioglossum		Lasioglossum ostridorsum (Dorey, Schwarz and Stevens, 2019)			1	-17.6148	178.018				1328		Viti_Levu	2017-04-17	10:45:00		Fiji							http://dx.doi.org/10.1098/rspb.2020.0045	SAMA
preservedSpecimen		17FJ138				Lasioglossum		Lasioglossum atritergus (Dorey, Schwarz and Stevens, 2019)			1	-17.6148	178.018				1328		Viti_Levu	2017-04-17	10:45:00		Fiji							http://dx.doi.org/10.1098/rspb.2020.0045	SAMA
preservedSpecimen		17FJ139				Lasioglossum		Lasioglossum atritergus (Dorey, Schwarz and Stevens, 2019)			1	-17.6148	178.018				1328		Viti_Levu	2017-04-17	10:45:00		Fiji							http://dx.doi.org/10.1098/rspb.2020.0045	SAMA
preservedSpecimen		17FJ14				Lasioglossum		Lasioglossum atritergus (Dorey, Schwarz and Stevens, 2019)			1	-17.7359	178.074				715		Viti_Levu	2017-04-17	11:20:00		Fiji							http://dx.doi.org/10.1098/rspb.2020.0045	SAMA
preservedSpecimen		17FJ140				Lasioglossum		Lasioglossum atritergus (Dorey, Schwarz and Stevens, 2019)			1	-17.6148	178.018				1328		Viti_Levu	2017-04-17	10:45:00		Fiji							http://dx.doi.org/10.1098/rspb.2020.0045	SAMA
preservedSpecimen		17FJ141				Lasioglossum		Lasioglossum ostridorsum (Dorey, Schwarz and Stevens, 2019)			1	-17.6148	178.018				1328		Viti_Levu	2017-04-17	10:45:00		Fiji							http://dx.doi.org/10.1098/rspb.2020.0045	SAMA
preservedSpecimen		17FJ142				Lasioglossum		Lasioglossum atritergus (Dorey, Schwarz and Stevens, 2019)			1	-17.6148	178.018				1328		Viti_Levu	2017-04-17	10:45:00		Fiji							http://dx.doi.org/10.1098/rspb.2020.0045	SAMA
preservedSpecimen		17FJ143				Lasioglossum		Lasioglossum ostridorsum (Dorey, Schwarz and Stevens, 2019)			1	-17.6148	178.018				1328		Viti_Levu	2017-04-17	10:45:00		Fiji							http://dx.doi.org/10.1098/rspb.2020.0045	SAMA
preservedSpecimen		17FJ144				Lasioglossum		Lasioglossum atritergus (Dorey, Schwarz and Stevens, 2019)			1	-17.6148	178.018				1328		Viti_Levu	2017-04-17	10:45:00		Fiji							http://dx.doi.org/10.1098/rspb.2020.0045	SAMA
preservedSpecimen		17FJ145				Lasioglossum		Lasioglossum ostridorsum (Dorey, Schwarz and Stevens, 2019)			1	-17.6148	178.018				1328		Viti_Levu	2017-04-17	10:45:00		Fiji							http://dx.doi.org/10.1098/rspb.2020.0045	SAMA
preservedSpecimen		17FJ146				Lasioglossum		Lasioglossum ostridorsum (Dorey, Schwarz and Stevens, 2019)			1	-17.6148	178.018				1328		Viti_Levu	2017-04-17	10:45:00		Fiji							http://dx.doi.org/10.1098/rspb.2020.0045	SAMA
preservedSpecimen		17FJ147				Lasioglossum		Lasioglossum atritergus (Dorey, Schwarz and Stevens, 2019)			1	-17.6148	178.018				1328		Viti_Levu	2017-04-17	10:45:00		Fiji							http://dx.doi.org/10.1098/rspb.2020.0045	SAMA
preservedSpecimen		17FJ148				Lasioglossum		Lasioglossum atritergus (Dorey, Schwarz and Stevens, 2019)			1	-17.6148	178.018				1328		Viti_Levu	2017-04-17	10:45:00		Fiji							http://dx.doi.org/10.1098/rspb.2020.0045	SAMA
preservedSpecimen		17FJ149				Lasioglossum		Lasioglossum ostridorsum (Dorey, Schwarz and Stevens, 2019)			1	-17.6147	178.018				1222		Viti_Levu	2017-04-18	14:30:00		Fiji							http://dx.doi.org/10.1098/rspb.2020.0045	SAMA
preservedSpecimen		17FJ150				Lasioglossum		Lasioglossum ostridorsum (Dorey, Schwarz and Stevens, 2019)			1	-17.6147	178.018				1222		Viti_Levu	2017-04-18	14:30:00		Fiji							http://dx.doi.org/10.1098/rspb.2020.0045	SAMA
preservedSpecimen		17FJ151				Lasioglossum		Lasioglossum ostridorsum (Dorey, Schwarz and Stevens, 2019)			1	-17.6147	178.018				1222		Viti_Levu	2017-04-18	14:30:00		Fiji							http://dx.doi.org/10.1098/rspb.2020.0045	SAMA
preservedSpecimen		17FJ152				Lasioglossum		Lasioglossum ostridorsum (Dorey, Schwarz and Stevens, 2019)			1	-17.6147	178.018				1222		Viti_Levu	2017-04-18	14:30:00		Fiji							http://dx.doi.org/10.1098/rspb.2020.0045	SAMA
preservedSpecimen		17FJ153				Lasioglossum		Lasioglossum ostridorsum (Dorey, Schwarz and Stevens, 2019)			1	-17.6167	178.015				1200		Viti_Levu	2017-04-17	09:43:00		Fiji							http://dx.doi.org/10.1098/rspb.2020.0045	SAMA
preservedSpecimen		17FJ154				Lasioglossum		Lasioglossum ostridorsum (Dorey, Schwarz and Stevens, 2019)			1	-17.6147	178.018				1268		Viti_Levu	2017-04-18	11:52:00		Fiji							http://dx.doi.org/10.1098/rspb.2020.0045	SAMA
preservedSpecimen		17FJ155				Lasioglossum		Lasioglossum fijiense (Perkins and Cheesman, 1928)			1	-17.6098	177.98				865		Viti_Levu	2017-04-19	10:35:00		Fiji							http://dx.doi.org/10.1098/rspb.2020.0045	SAMA
preservedSpecimen		17FJ156				Lasioglossum		Lasioglossum fijiense (Perkins and Cheesman, 1928)			1	-17.6098	177.98				865		Viti_Levu	2017-04-19	10:35:00		Fiji							http://dx.doi.org/10.1098/rspb.2020.0045	SAMA
preservedSpecimen		17FJ157				Lasioglossum		Lasioglossum fijiense (Perkins and Cheesman, 1928)			1	-17.6098	177.98				865		Viti_Levu	2017-04-19	10:35:00		Fiji							http://dx.doi.org/10.1098/rspb.2020.0045	SAMA
preservedSpecimen		17FJ158				Lasioglossum		Lasioglossum tuiwawae (Dorey, Schwarz and Stevens, 2019)			1	-17.6098	177.98				865		Viti_Levu	2017-04-19	10:35:00		Fiji							http://dx.doi.org/10.1098/rspb.2020.0045	SAMA
preservedSpecimen		17FJ159				Lasioglossum		Lasioglossum fijiense (Perkins and Cheesman, 1928)			1	-17.6098	177.98				865		Viti_Levu	2017-04-19	10:35:00		Fiji							http://dx.doi.org/10.1098/rspb.2020.0045	SAMA
preservedSpecimen		17FJ16				Lasioglossum		Lasioglossum atritergus (Dorey, Schwarz and Stevens, 2019)			1	-17.6744	177.54				612		Viti_Levu	2017-04-28	12:00:00		Fiji							http://dx.doi.org/10.1098/rspb.2020.0045	SAMA
preservedSpecimen		17FJ160				Lasioglossum		Lasioglossum fijiense (Perkins and Cheesman, 1928)			1	-17.6098	177.98				865		Viti_Levu	2017-04-19	10:35:00		Fiji							http://dx.doi.org/10.1098/rspb.2020.0045	SAMA
preservedSpecimen		17FJ161				Lasioglossum		Lasioglossum fijiense (Perkins and Cheesman, 1928)			1	-17.6098	177.98				865		Viti_Levu	2017-04-19	10:35:00		Fiji							http://dx.doi.org/10.1098/rspb.2020.0045	SAMA
preservedSpecimen		17FJ162				Lasioglossum		Lasioglossum atritergus (Dorey, Schwarz and Stevens, 2019)			1	-17.6098	177.98				865		Viti_Levu	2017-04-19	10:35:00		Fiji							http://dx.doi.org/10.1098/rspb.2020.0045	SAMA
preservedSpecimen		17FJ163				Lasioglossum		Lasioglossum fijiense (Perkins and Cheesman, 1928)			1	-17.6098	177.98				865		Viti_Levu	2017-04-19	10:35:00		Fiji							http://dx.doi.org/10.1098/rspb.2020.0045	SAMA
preservedSpecimen		17FJ164				Lasioglossum		Lasioglossum fijiense (Perkins and Cheesman, 1928)			1	-17.6098	177.98				865		Viti_Levu	2017-04-19	10:35:00		Fiji							http://dx.doi.org/10.1098/rspb.2020.0045	SAMA
preservedSpecimen		17FJ165				Lasioglossum		Lasioglossum fijiense (Perkins and Cheesman, 1928)			1	-17.6098	177.98				865		Viti_Levu	2017-04-19	10:35:00		Fiji							http://dx.doi.org/10.1098/rspb.2020.0045	SAMA
preservedSpecimen		17FJ166				Lasioglossum		Lasioglossum fijiense (Perkins and Cheesman, 1928)			1	-17.6179	177.986				728		Viti_Levu	2017-04-19	11:30:00		Fiji							http://dx.doi.org/10.1098/rspb.2020.0045	SAMA
preservedSpecimen		17FJ167				Lasioglossum		Lasioglossum fijiense (Perkins and Cheesman, 1928)			1	-17.6179	177.986				728		Viti_Levu	2017-04-19	11:30:00		Fiji							http://dx.doi.org/10.1098/rspb.2020.0045	SAMA
preservedSpecimen		17FJ168				Lasioglossum		Lasioglossum fijiense (Perkins and Cheesman, 1928)			1	-17.6179	177.986				728		Viti_Levu	2017-04-19	11:30:00		Fiji							http://dx.doi.org/10.1098/rspb.2020.0045	SAMA
preservedSpecimen		17FJ169				Lasioglossum		Lasioglossum fijiense (Perkins and Cheesman, 1928)			1	-17.6179	177.986				728		Viti_Levu	2017-04-19	11:30:00		Fiji							http://dx.doi.org/10.1098/rspb.2020.0045	SAMA
preservedSpecimen		17FJ17				Lasioglossum		Lasioglossum atritergus (Dorey, Schwarz and Stevens, 2019)			1	-17.7381	178.055				932		Viti_Levu	2017-04-17	13:10:00		Fiji							http://dx.doi.org/10.1098/rspb.2020.0045	SAMA
preservedSpecimen		17FJ170				Lasioglossum		Lasioglossum concavum (Dorey, Schwarz and Stevens, 2019)			1	-16.8194	-179.938				815		Taveuni	2017-04-13	13:20:00		Fiji							http://dx.doi.org/10.1098/rspb.2020.0045	SAMA
preservedSpecimen		17FJ171				Lasioglossum		Lasioglossum concavum (Dorey, Schwarz and Stevens, 2019)			1	-16.8194	-179.938				815		Taveuni	2017-04-13	13:20:00		Fiji							http://dx.doi.org/10.1098/rspb.2020.0045	SAMA
preservedSpecimen		17FJ173				Lasioglossum		Lasioglossum concavum (Dorey, Schwarz and Stevens, 2019)			1	-16.8196	-179.942				816		Taveuni	2017-04-14	10:47:00		Fiji							http://dx.doi.org/10.1098/rspb.2020.0045	SAMA
preservedSpecimen		17FJ174				Lasioglossum		Lasioglossum concavum (Dorey, Schwarz and Stevens, 2019)			1	-16.8196	-179.942				816		Taveuni	2017-04-14	10:47:00		Fiji							http://dx.doi.org/10.1098/rspb.2020.0045	SAMA
preservedSpecimen		17FJ175				Lasioglossum		Lasioglossum concavum (Dorey, Schwarz and Stevens, 2019)			1	-16.8196	-179.942				816		Taveuni	2017-04-14	10:47:00		Fiji							http://dx.doi.org/10.1098/rspb.2020.0045	SAMA
preservedSpecimen		17FJ176				Lasioglossum		Lasioglossum concavum (Dorey, Schwarz and Stevens, 2019)			1	-16.8196	-179.942				816		Taveuni	2017-04-14	10:47:00		Fiji							http://dx.doi.org/10.1098/rspb.2020.0045	SAMA
preservedSpecimen		17FJ177				Lasioglossum		Lasioglossum concavum (Dorey, Schwarz and Stevens, 2019)			1	-16.8196	-179.942				816		Taveuni	2017-04-14	10:47:00		Fiji							http://dx.doi.org/10.1098/rspb.2020.0045	SAMA
preservedSpecimen		17FJ178				Lasioglossum		Lasioglossum concavum (Dorey, Schwarz and Stevens, 2019)			1	-16.8196	-179.942				816		Taveuni	2017-04-14	10:47:00		Fiji							http://dx.doi.org/10.1098/rspb.2020.0045	SAMA
preservedSpecimen		17FJ179				Lasioglossum		Lasioglossum concavum (Dorey, Schwarz and Stevens, 2019)			1	-16.8196	-179.942				816		Taveuni	2017-04-14	10:47:00		Fiji							http://dx.doi.org/10.1098/rspb.2020.0045	SAMA
preservedSpecimen		17FJ18				Lasioglossum		Lasioglossum atritergus (Dorey, Schwarz and Stevens, 2019)			1	-17.5749	177.934				1054		Viti_Levu	2017-04-21	11:00:00		Fiji							http://dx.doi.org/10.1098/rspb.2020.0045	SAMA
preservedSpecimen		17FJ180				Lasioglossum		Lasioglossum concavum (Dorey, Schwarz and Stevens, 2019)			1	-16.8196	-179.942				816		Taveuni	2017-04-14	10:47:00		Fiji							http://dx.doi.org/10.1098/rspb.2020.0045	SAMA
preservedSpecimen		17FJ181				Lasioglossum		Lasioglossum concavum (Dorey, Schwarz and Stevens, 2019)			1	-16.8196	-179.942				816		Taveuni	2017-04-14	10:47:00		Fiji							http://dx.doi.org/10.1098/rspb.2020.0045	SAMA
preservedSpecimen		17FJ182				Lasioglossum		Lasioglossum concavum (Dorey, Schwarz and Stevens, 2019)			1	-16.8193	-179.939				818		Taveuni	2017-04-14	11:49:00		Fiji							http://dx.doi.org/10.1098/rspb.2020.0045	SAMA
preservedSpecimen		17FJ183				Lasioglossum		Lasioglossum fijiense (Perkins and Cheesman, 1928)			1	-17.7382	178.066				872		Viti_Levu	2017-04-17	11:50:00		Fiji							http://dx.doi.org/10.1098/rspb.2020.0045	SAMA
preservedSpecimen		17FJ184				Lasioglossum		Lasioglossum fijiense (Perkins and Cheesman, 1928)			1	-17.7382	178.066				872		Viti_Levu	2017-04-17	11:50:00		Fiji							http://dx.doi.org/10.1098/rspb.2020.0045	SAMA
preservedSpecimen		17FJ185				Lasioglossum		Lasioglossum fijiense (Perkins and Cheesman, 1928)			1	-17.7382	178.066				872		Viti_Levu	2017-04-17			Fiji							http://dx.doi.org/10.1098/rspb.2020.0045	SAMA
preservedSpecimen		17FJ186				Lasioglossum		Lasioglossum fijiense (Perkins and Cheesman, 1928)			1	-17.7382	178.066				872		Viti_Levu	2017-04-17			Fiji							http://dx.doi.org/10.1098/rspb.2020.0045	SAMA
preservedSpecimen		17FJ187				Lasioglossum		Lasioglossum fijiense (Perkins and Cheesman, 1928)			1	-17.7382	178.066				872		Viti_Levu	2017-04-17			Fiji							http://dx.doi.org/10.1098/rspb.2020.0045	SAMA
preservedSpecimen		17FJ188				Lasioglossum		Lasioglossum fijiense (Perkins and Cheesman, 1928)			1	-17.7382	178.066				872		Viti_Levu	2017-04-17			Fiji							http://dx.doi.org/10.1098/rspb.2020.0045	SAMA
preservedSpecimen		17FJ19				Lasioglossum		Lasioglossum Species D			1	-17.5826	177.937				934		Viti_Levu	2017-04-19			Fiji							http://dx.doi.org/10.1098/rspb.2020.0045	SAMA
preservedSpecimen		17FJ190				Lasioglossum		Lasioglossum fijiense (Perkins and Cheesman, 1928)			1	-17.7359	178.075				715		Viti_Levu	2017-04-17			Fiji							http://dx.doi.org/10.1098/rspb.2020.0045	SAMA
preservedSpecimen		17FJ191				Lasioglossum		Lasioglossum fijiense (Perkins and Cheesman, 1928)			1	-17.7359	178.075				715		Viti_Levu	2017-04-17			Fiji							http://dx.doi.org/10.1098/rspb.2020.0045	SAMA
preservedSpecimen		17FJ192				Lasioglossum		Lasioglossum fijiense (Perkins and Cheesman, 1928)			1	-17.7382	178.066				715		Viti_Levu	2017-04-17			Fiji							http://dx.doi.org/10.1098/rspb.2020.0045	SAMA
preservedSpecimen		17FJ193				Lasioglossum		Lasioglossum fijiense (Perkins and Cheesman, 1928)			1	-17.7381	178.057				925		Viti_Levu	2017-04-17			Fiji							http://dx.doi.org/10.1098/rspb.2020.0045	SAMA
preservedSpecimen		17FJ194				Lasioglossum		Lasioglossum Species J			1	-17.7381	178.057				925		Viti_Levu	2017-04-17			Fiji							http://dx.doi.org/10.1098/rspb.2020.0045	SAMA
preservedSpecimen		17FJ195				Lasioglossum		Lasioglossum fijiense (Perkins and Cheesman, 1928)			1	-17.7381	178.057				925		Viti_Levu	2017-04-17			Fiji							http://dx.doi.org/10.1098/rspb.2020.0045	SAMA
preservedSpecimen		17FJ196				Lasioglossum		Lasioglossum fijiense (Perkins and Cheesman, 1928)			1	-17.6853	178.004				835		Viti_Levu	2017-04-17			Fiji							http://dx.doi.org/10.1098/rspb.2020.0045	SAMA
preservedSpecimen		17FJ197				Lasioglossum		Lasioglossum kaicolo (Dorey, Schwarz and Stevens, 2019)			1	-17.7381	178.055				932		Viti_Levu	2017-04-17			Fiji							http://dx.doi.org/10.1098/rspb.2020.0045	SAMA
preservedSpecimen		17FJ198				Lasioglossum		Lasioglossum fijiense (Perkins and Cheesman, 1928)			1	-17.7367	178.072				872		Viti_Levu	2017-04-17			Fiji							http://dx.doi.org/10.1098/rspb.2020.0045	SAMA
preservedSpecimen		17FJ199				Lasioglossum		Lasioglossum kaicolo (Dorey, Schwarz and Stevens, 2019)			1	-17.7381	178.057				872		Viti_Levu	2017-04-17			Fiji							http://dx.doi.org/10.1098/rspb.2020.0045	SAMA
preservedSpecimen		17FJ2				Lasioglossum		Lasioglossum atritergus (Dorey, Schwarz and Stevens, 2019)			1	-17.6153	178.017				1289		Viti_Levu	2017-04-18			Fiji							http://dx.doi.org/10.1098/rspb.2020.0045	SAMA
preservedSpecimen		17FJ200				Lasioglossum		Lasioglossum fijiense (Perkins and Cheesman, 1928)			1	-17.7381	178.057				872		Viti_Levu	2017-04-17			Fiji							http://dx.doi.org/10.1098/rspb.2020.0045	SAMA
preservedSpecimen		17FJ201				Lasioglossum		Lasioglossum fijiense (Perkins and Cheesman, 1928)			1	-17.4184	178.003				842		Viti_Levu	2017-04-21			Fiji							http://dx.doi.org/10.1098/rspb.2020.0045	SAMA
preservedSpecimen		17FJ203				Lasioglossum		Lasioglossum nadarivatu (Dorey, Schwarz and Stevens, 2019)			1	-17.7382	178.066				842		Viti_Levu	2017-04-21			Fiji							http://dx.doi.org/10.1098/rspb.2020.0045	SAMA
preservedSpecimen		17FJ204				Lasioglossum		Lasioglossum fijiense (Perkins and Cheesman, 1928)			1	-17.4184	178.003				842		Viti_Levu	2017-04-21			Fiji							http://dx.doi.org/10.1098/rspb.2020.0045	SAMA
preservedSpecimen		17FJ205				Lasioglossum		Lasioglossum kaicolo (Dorey, Schwarz and Stevens, 2019)			1	-17.5749	177.934				1054		Viti_Levu	2017-04-21			Fiji							http://dx.doi.org/10.1098/rspb.2020.0045	SAMA
preservedSpecimen		17FJ206				Lasioglossum		Lasioglossum fijiense (Perkins and Cheesman, 1928)			1	-17.5679	177.952				902		Viti_Levu	2017-04-19			Fiji							http://dx.doi.org/10.1098/rspb.2020.0045	SAMA
preservedSpecimen		17FJ207				Lasioglossum		Lasioglossum fijiense (Perkins and Cheesman, 1928)			1	-17.5797	177.94				937		Viti_Levu	2017-04-19			Fiji							http://dx.doi.org/10.1098/rspb.2020.0045	SAMA
preservedSpecimen		17FJ208				Lasioglossum		Lasioglossum fijiense (Perkins and Cheesman, 1928)			1	-17.5797	177.94				937		Viti_Levu	2017-04-19			Fiji							http://dx.doi.org/10.1098/rspb.2020.0045	SAMA
preservedSpecimen		17FJ209				Lasioglossum		Lasioglossum fijiense (Perkins and Cheesman, 1928)			1	-17.5797	177.94				937		Viti_Levu	2017-04-19			Fiji							http://dx.doi.org/10.1098/rspb.2020.0045	SAMA
preservedSpecimen		17FJ21				Lasioglossum		Lasioglossum atritergus (Dorey, Schwarz and Stevens, 2019)			1	-17.5826	177.937				934		Viti_Levu	2017-04-19			Fiji							http://dx.doi.org/10.1098/rspb.2020.0045	SAMA
preservedSpecimen		17FJ210				Lasioglossum		Lasioglossum fijiense (Perkins and Cheesman, 1928)			1	-17.5826	177.937				934		Viti_Levu	2017-04-19			Fiji							http://dx.doi.org/10.1098/rspb.2020.0045	SAMA
preservedSpecimen		17FJ211				Lasioglossum		Lasioglossum fijiense (Perkins and Cheesman, 1928)			1	-17.5826	177.937				934		Viti_Levu	2017-04-19			Fiji							http://dx.doi.org/10.1098/rspb.2020.0045	SAMA
preservedSpecimen		17FJ212				Lasioglossum		Lasioglossum fijiense (Perkins and Cheesman, 1928)			1	-17.5679	177.952				902		Viti_Levu	2017-04-19			Fiji							http://dx.doi.org/10.1098/rspb.2020.0045	SAMA
preservedSpecimen		17FJ213				Lasioglossum		Lasioglossum fijiense (Perkins and Cheesman, 1928)			1	-17.5679	177.952				902		Viti_Levu	2017-04-19			Fiji							http://dx.doi.org/10.1098/rspb.2020.0045	SAMA
preservedSpecimen		17FJ214				Lasioglossum		Lasioglossum fijiense (Perkins and Cheesman, 1928)			1	-17.5826	177.937				934		Viti_Levu	2017-04-19			Fiji							http://dx.doi.org/10.1098/rspb.2020.0045	SAMA
preservedSpecimen		17FJ215				Lasioglossum		Lasioglossum tuiwawae (Dorey, Schwarz and Stevens, 2019)			1	-17.6185	177.979				810		Viti_Levu	2017-04-18			Fiji							http://dx.doi.org/10.1098/rspb.2020.0045	SAMA
preservedSpecimen		17FJ216				Lasioglossum		Lasioglossum tuiwawae (Dorey, Schwarz and Stevens, 2019)			1	-17.6185	177.979				810		Viti_Levu	2017-04-18			Fiji							http://dx.doi.org/10.1098/rspb.2020.0045	SAMA
preservedSpecimen		17FJ217				Lasioglossum		Lasioglossum fijiense (Perkins and Cheesman, 1928)			1	-17.7056	178.01				859		Viti_Levu	2017-04-17			Fiji							http://dx.doi.org/10.1098/rspb.2020.0045	SAMA
preservedSpecimen		17FJ218				Lasioglossum		Lasioglossum Species J			1	-17.7382	178.066				872		Viti_Levu	2017-04-17			Fiji							http://dx.doi.org/10.1098/rspb.2020.0045	SAMA
preservedSpecimen		17FJ219				Lasioglossum		Lasioglossum fijiense (Perkins and Cheesman, 1928)			1	-17.7382	178.066				872		Viti_Levu	2017-04-17			Fiji							http://dx.doi.org/10.1098/rspb.2020.0045	SAMA
preservedSpecimen		17FJ22				Lasioglossum		Lasioglossum atritergus (Dorey, Schwarz and Stevens, 2019)			1	-17.5826	177.937				934		Viti_Levu	2017-04-19			Fiji							http://dx.doi.org/10.1098/rspb.2020.0045	SAMA
preservedSpecimen		17FJ220				Lasioglossum		Lasioglossum fijiense (Perkins and Cheesman, 1928)			1	-17.7359	178.075				715		Viti_Levu	2017-04-17			Fiji							http://dx.doi.org/10.1098/rspb.2020.0045	SAMA
preservedSpecimen		17FJ221				Lasioglossum		Lasioglossum fijiense (Perkins and Cheesman, 1928)			1	-17.7359	178.075				750		Viti_Levu	2017-04-17			Fiji							http://dx.doi.org/10.1098/rspb.2020.0045	SAMA
preservedSpecimen		17FJ23				Lasioglossum		Lasioglossum fijiense (Perkins and Cheesman, 1928)			1	-17.676	177.54				664		Viti_Levu	2017-04-28			Fiji							http://dx.doi.org/10.1098/rspb.2020.0045	SAMA
preservedSpecimen		17FJ24				Lasioglossum		Lasioglossum fijiense (Perkins and Cheesman, 1928)			1	-17.676	177.54				664		Viti_Levu	2017-04-28			Fiji							http://dx.doi.org/10.1098/rspb.2020.0045	SAMA
preservedSpecimen		17FJ25				Lasioglossum		Lasioglossum fijiense (Perkins and Cheesman, 1928)			1	-17.676	177.54				664		Viti_Levu	2017-04-28			Fiji							http://dx.doi.org/10.1098/rspb.2020.0045	SAMA
preservedSpecimen		17FJ26				Lasioglossum		Lasioglossum fijiense (Perkins and Cheesman, 1928)			1	-17.676	177.54				664		Viti_Levu	2017-04-28			Fiji							http://dx.doi.org/10.1098/rspb.2020.0045	SAMA
preservedSpecimen		17FJ27				Lasioglossum		Lasioglossum fijiense (Perkins and Cheesman, 1928)			1	-17.676	177.54				664		Viti_Levu	2017-04-28			Fiji							http://dx.doi.org/10.1098/rspb.2020.0045	SAMA
preservedSpecimen		17FJ30				Lasioglossum		Lasioglossum Species S			1	-17.6866	177.544				1118		Viti_Levu	2017-04-27			Fiji							http://dx.doi.org/10.1098/rspb.2020.0045	SAMA
preservedSpecimen		17FJ31				Lasioglossum		Lasioglossum Species S			1	-17.6866	177.544				1118		Viti_Levu	2017-04-27			Fiji							http://dx.doi.org/10.1098/rspb.2020.0045	SAMA
preservedSpecimen		17FJ32				Lasioglossum		Lasioglossum Species S			1	-17.6866	177.544				1118		Viti_Levu	2017-04-27			Fiji							http://dx.doi.org/10.1098/rspb.2020.0045	SAMA
preservedSpecimen		17FJ33				Lasioglossum		Lasioglossum Species S			1	-17.6866	177.544				1118		Viti_Levu	2017-04-27			Fiji							http://dx.doi.org/10.1098/rspb.2020.0045	SAMA
preservedSpecimen		17FJ34				Lasioglossum		Lasioglossum Species S			1	-17.6866	177.544				1118		Viti_Levu	2017-04-27			Fiji							http://dx.doi.org/10.1098/rspb.2020.0045	SAMA
preservedSpecimen		17FJ35				Lasioglossum		Lasioglossum Species S			1	-17.6866	177.544				1118		Viti_Levu	2017-04-27			Fiji							http://dx.doi.org/10.1098/rspb.2020.0045	SAMA
preservedSpecimen		17FJ36				Lasioglossum		Lasioglossum Species S			1	-17.6866	177.544				1118		Viti_Levu	2017-04-27			Fiji							http://dx.doi.org/10.1098/rspb.2020.0045	SAMA
preservedSpecimen		17FJ37				Lasioglossum		Lasioglossum Species S			1	-17.6866	177.544				1118		Viti_Levu	2017-04-27			Fiji							http://dx.doi.org/10.1098/rspb.2020.0045	SAMA
preservedSpecimen		17FJ38				Lasioglossum		Lasioglossum Species S			1	-17.6866	177.544				1118		Viti_Levu	2017-04-27			Fiji							http://dx.doi.org/10.1098/rspb.2020.0045	SAMA
preservedSpecimen		17FJ39				Lasioglossum		Lasioglossum Species S			1	-17.6866	177.544				1118		Viti_Levu	2017-04-27			Fiji							http://dx.doi.org/10.1098/rspb.2020.0045	SAMA
preservedSpecimen		17FJ4				Lasioglossum		Lasioglossum atritergus (Dorey, Schwarz and Stevens, 2019)			1	-17.5702	177.955				934		Viti_Levu	2017-04-16			Fiji							http://dx.doi.org/10.1098/rspb.2020.0045	SAMA
preservedSpecimen		17FJ40				Lasioglossum		Lasioglossum Species S			1	-17.6866	177.544				1118		Viti_Levu	2017-04-27			Fiji							http://dx.doi.org/10.1098/rspb.2020.0045	SAMA
preservedSpecimen		17FJ41				Lasioglossum		Lasioglossum terminale (Dorey, Schwarz and Stevens, 2019)			1	-17.6866	177.544				1118		Viti_Levu	2017-04-27			Fiji							http://dx.doi.org/10.1098/rspb.2020.0045	SAMA
preservedSpecimen		17FJ42				Lasioglossum		Lasioglossum Species S			1	-17.6866	177.544				1118		Viti_Levu	2017-04-27			Fiji							http://dx.doi.org/10.1098/rspb.2020.0045	SAMA
preservedSpecimen		17FJ43				Lasioglossum		Lasioglossum terminale (Dorey, Schwarz and Stevens, 2019)			1	-17.6866	177.544				1118		Viti_Levu	2017-04-27			Fiji							http://dx.doi.org/10.1098/rspb.2020.0045	SAMA
preservedSpecimen		17FJ44				Lasioglossum		Lasioglossum terminale (Dorey, Schwarz and Stevens, 2019)			1	-17.6866	177.544				1118		Viti_Levu	2017-04-27			Fiji							http://dx.doi.org/10.1098/rspb.2020.0045	SAMA
preservedSpecimen		17FJ45				Lasioglossum		Lasioglossum Species S			1	-17.6866	177.544				1118		Viti_Levu	2017-04-27			Fiji							http://dx.doi.org/10.1098/rspb.2020.0045	SAMA
preservedSpecimen		17FJ46				Lasioglossum		Lasioglossum Species S			1	-17.6866	177.544				1118		Viti_Levu	2017-04-27			Fiji							http://dx.doi.org/10.1098/rspb.2020.0045	SAMA
preservedSpecimen		17FJ47				Lasioglossum		Lasioglossum Species S			1	-17.6866	177.544				1118		Viti_Levu	2017-04-27			Fiji							http://dx.doi.org/10.1098/rspb.2020.0045	SAMA
preservedSpecimen		17FJ48				Lasioglossum		Lasioglossum terminale (Dorey, Schwarz and Stevens, 2019)			1	-17.6866	177.544				1118		Viti_Levu	2017-04-27			Fiji							http://dx.doi.org/10.1098/rspb.2020.0045	SAMA
preservedSpecimen		17FJ5				Lasioglossum		Lasioglossum Species D			1	-17.6098	177.98				865		Viti_Levu	2017-04-19			Fiji							http://dx.doi.org/10.1098/rspb.2020.0045	SAMA
preservedSpecimen		17FJ50				Lasioglossum		Lasioglossum terminale (Dorey, Schwarz and Stevens, 2019)			1	-17.6866	177.544				1118		Viti_Levu	2017-04-27			Fiji							http://dx.doi.org/10.1098/rspb.2020.0045	SAMA
preservedSpecimen		17FJ51				Lasioglossum		Lasioglossum Species S			1	-17.6866	177.544				1118		Viti_Levu	2017-04-27			Fiji							http://dx.doi.org/10.1098/rspb.2020.0045	SAMA
preservedSpecimen		17FJ52				Lasioglossum		Lasioglossum Species S			1	-17.6866	177.544				1118		Viti_Levu	2017-04-27			Fiji							http://dx.doi.org/10.1098/rspb.2020.0045	SAMA
preservedSpecimen		17FJ53				Lasioglossum		Lasioglossum Species S			1	-17.6866	177.544				1118		Viti_Levu	2017-04-27			Fiji							http://dx.doi.org/10.1098/rspb.2020.0045	SAMA
preservedSpecimen		17FJ54				Lasioglossum		Lasioglossum Species S			1	-17.6866	177.544				1118		Viti_Levu	2017-04-27			Fiji							http://dx.doi.org/10.1098/rspb.2020.0045	SAMA
preservedSpecimen		17FJ55				Lasioglossum		Lasioglossum Species S			1	-17.6866	177.544				1118		Viti_Levu	2017-04-27			Fiji							http://dx.doi.org/10.1098/rspb.2020.0045	SAMA
preservedSpecimen		17FJ56				Lasioglossum		Lasioglossum Species S			1	-17.6866	177.544				1118		Viti_Levu	2017-04-27			Fiji							http://dx.doi.org/10.1098/rspb.2020.0045	SAMA
preservedSpecimen		17FJ57				Lasioglossum		Lasioglossum Species S			1	-17.6866	177.544				1118		Viti_Levu	2017-04-27			Fiji							http://dx.doi.org/10.1098/rspb.2020.0045	SAMA
preservedSpecimen		17FJ59				Lasioglossum		Lasioglossum Species S			1	-17.6866	177.544				1118		Viti_Levu	2017-04-27			Fiji							http://dx.doi.org/10.1098/rspb.2020.0045	SAMA
preservedSpecimen		17FJ6				Lasioglossum		Lasioglossum atritergus (Dorey, Schwarz and Stevens, 2019)			1	-17.6098	177.98				865		Viti_Levu	2017-04-19			Fiji							http://dx.doi.org/10.1098/rspb.2020.0045	SAMA
preservedSpecimen		17FJ60				Lasioglossum		Lasioglossum Species S			1	-17.6866	177.544				1118		Viti_Levu	2017-04-27			Fiji							http://dx.doi.org/10.1098/rspb.2020.0045	SAMA
preservedSpecimen		17FJ61				Lasioglossum		Lasioglossum Species S			1	-17.6866	177.544				1118		Viti_Levu	2017-04-27			Fiji							http://dx.doi.org/10.1098/rspb.2020.0045	SAMA
preservedSpecimen		17FJ62				Lasioglossum		Lasioglossum Species S			1	-17.6866	177.544				1118		Viti_Levu	2017-04-27			Fiji							http://dx.doi.org/10.1098/rspb.2020.0045	SAMA
preservedSpecimen		17FJ63				Lasioglossum		Lasioglossum fijiense (Perkins and Cheesman, 1928)			1	-17.6866	177.544				1118		Viti_Levu	2017-04-27			Fiji							http://dx.doi.org/10.1098/rspb.2020.0045	SAMA
preservedSpecimen		17FJ64				Lasioglossum		Lasioglossum Species S			1	-17.6866	177.544				1118		Viti_Levu	2017-04-27			Fiji							http://dx.doi.org/10.1098/rspb.2020.0045	SAMA
preservedSpecimen		17FJ65				Lasioglossum		Lasioglossum Species S			1	-17.6866	177.544				1118		Viti_Levu	2017-04-27			Fiji							http://dx.doi.org/10.1098/rspb.2020.0045	SAMA
preservedSpecimen		17FJ66				Lasioglossum		Lasioglossum fijiense (Perkins and Cheesman, 1928)			1	-17.6866	177.544				1118		Viti_Levu	2017-04-27			Fiji							http://dx.doi.org/10.1098/rspb.2020.0045	SAMA
preservedSpecimen		17FJ68				Lasioglossum		Lasioglossum terminale (Dorey, Schwarz and Stevens, 2019)			1	-17.6866	177.544				1118		Viti_Levu	2017-04-27			Fiji							http://dx.doi.org/10.1098/rspb.2020.0045	SAMA
preservedSpecimen		17FJ69				Lasioglossum		Lasioglossum Species S			1	-17.6866	177.544				1118		Viti_Levu	2017-04-27			Fiji							http://dx.doi.org/10.1098/rspb.2020.0045	SAMA
preservedSpecimen		17FJ7				Lasioglossum		Lasioglossum atritergus (Dorey, Schwarz and Stevens, 2019)			1	-17.6098	177.98				865		Viti_Levu	2017-04-19			Fiji							http://dx.doi.org/10.1098/rspb.2020.0045	SAMA
preservedSpecimen		17FJ70				Lasioglossum		Lasioglossum Species S			1	-17.6866	177.544				1118		Viti_Levu	2017-04-27			Fiji							http://dx.doi.org/10.1098/rspb.2020.0045	SAMA
preservedSpecimen		17FJ71				Lasioglossum		Lasioglossum Species S			1	-17.6866	177.544				1118		Viti_Levu	2017-04-27			Fiji							http://dx.doi.org/10.1098/rspb.2020.0045	SAMA
preservedSpecimen		17FJ72				Lasioglossum		Lasioglossum Species S			1	-17.6866	177.544				1118		Viti_Levu	2017-04-27			Fiji							http://dx.doi.org/10.1098/rspb.2020.0045	SAMA
preservedSpecimen		17FJ73				Lasioglossum		Lasioglossum Species S			1	-17.6866	177.544				1118		Viti_Levu	2017-04-27			Fiji							http://dx.doi.org/10.1098/rspb.2020.0045	SAMA
preservedSpecimen		17FJ74				Lasioglossum		Lasioglossum Species S			1	-17.6866	177.544				1118		Viti_Levu	2017-04-27			Fiji							http://dx.doi.org/10.1098/rspb.2020.0045	SAMA
preservedSpecimen		17FJ75				Lasioglossum		Lasioglossum Species S			1	-17.6866	177.544				1118		Viti_Levu	2017-04-27			Fiji							http://dx.doi.org/10.1098/rspb.2020.0045	SAMA
preservedSpecimen		17FJ76				Lasioglossum		Lasioglossum Species S			1	-17.6866	177.544				1118		Viti_Levu	2017-04-27			Fiji							http://dx.doi.org/10.1098/rspb.2020.0045	SAMA
preservedSpecimen		17FJ77				Lasioglossum		Lasioglossum fijiense (Perkins and Cheesman, 1928)			1	-17.6794	177.544				938		Viti_Levu	2017-04-28			Fiji							http://dx.doi.org/10.1098/rspb.2020.0045	SAMA
preservedSpecimen		17FJ78				Lasioglossum		Lasioglossum Species G			1	-17.6794	177.544				938		Viti_Levu	2017-04-28			Fiji							http://dx.doi.org/10.1098/rspb.2020.0045	SAMA
preservedSpecimen		17FJ79				Lasioglossum		Lasioglossum Species G			1	-17.6778	177.54				842		Viti_Levu	2017-04-28			Fiji							http://dx.doi.org/10.1098/rspb.2020.0045	SAMA
preservedSpecimen		17FJ8				Lasioglossum		Lasioglossum atritergus (Dorey, Schwarz and Stevens, 2019)			1	-18.1174	178.043				145		Viti_Levu	2017-04-20			Fiji							http://dx.doi.org/10.1098/rspb.2020.0045	SAMA
preservedSpecimen		17FJ80				Lasioglossum		Lasioglossum tuiwawae (Dorey, Schwarz and Stevens, 2019)			1	-17.6778	177.54				842		Viti_Levu	2017-04-28			Fiji							http://dx.doi.org/10.1098/rspb.2020.0045	SAMA
preservedSpecimen		17FJ81				Lasioglossum		Lasioglossum fijiense (Perkins and Cheesman, 1928)			1	-17.6744	177.54				612		Viti_Levu	2017-04-28			Fiji							http://dx.doi.org/10.1098/rspb.2020.0045	SAMA
preservedSpecimen		17FJ82				Lasioglossum		Lasioglossum fijiense (Perkins and Cheesman, 1928)			1	-17.6178	177.539				543		Viti_Levu	2017-04-28			Fiji							http://dx.doi.org/10.1098/rspb.2020.0045	SAMA
preservedSpecimen		17FJ83				Lasioglossum		Lasioglossum fijiense (Perkins and Cheesman, 1928)			1	-17.6178	177.539				543		Viti_Levu	2017-04-28			Fiji							http://dx.doi.org/10.1098/rspb.2020.0045	SAMA
preservedSpecimen		17FJ84				Lasioglossum		Lasioglossum fijiense (Perkins and Cheesman, 1928)			1	-17.6178	177.539				543		Viti_Levu	2017-04-28			Fiji							http://dx.doi.org/10.1098/rspb.2020.0045	SAMA
preservedSpecimen		17FJ85				Lasioglossum		Lasioglossum fijiense (Perkins and Cheesman, 1928)			1	-17.6178	177.539				543		Viti_Levu	2017-04-28			Fiji							http://dx.doi.org/10.1098/rspb.2020.0045	SAMA
preservedSpecimen		17FJ86				Lasioglossum		Lasioglossum fijiense (Perkins and Cheesman, 1928)			1	-17.6178	177.539				543		Viti_Levu	2017-04-28			Fiji							http://dx.doi.org/10.1098/rspb.2020.0045	SAMA
preservedSpecimen		17FJ87				Lasioglossum		Lasioglossum fijiense (Perkins and Cheesman, 1928)			1	-17.6178	177.539				543		Viti_Levu	2017-04-28			Fiji							http://dx.doi.org/10.1098/rspb.2020.0045	SAMA
preservedSpecimen		17FJ88				Lasioglossum		Lasioglossum fijiense (Perkins and Cheesman, 1928)			1	-17.6178	177.539				543		Viti_Levu	2017-04-28			Fiji							http://dx.doi.org/10.1098/rspb.2020.0045	SAMA
preservedSpecimen		17FJ89				Lasioglossum		Lasioglossum fijiense (Perkins and Cheesman, 1928)			1	-17.6178	177.539				543		Viti_Levu	2017-04-28			Fiji							http://dx.doi.org/10.1098/rspb.2020.0045	SAMA
preservedSpecimen		17FJ9				Lasioglossum		Lasioglossum fijiense (Perkins and Cheesman, 1928)			1	-18.1185	178.041				140		Viti_Levu	2017-04-20			Fiji							http://dx.doi.org/10.1098/rspb.2020.0045	SAMA
preservedSpecimen		17FJ91				Lasioglossum		Lasioglossum ostridorsum (Dorey, Schwarz and Stevens, 2019)			1	-17.6153	178.017				1289		Viti_Levu	2017-04-18			Fiji							http://dx.doi.org/10.1098/rspb.2020.0045	SAMA
preservedSpecimen		17FJ92				Lasioglossum		Lasioglossum ostridorsum (Dorey, Schwarz and Stevens, 2019)			1	-17.6153	178.017				1289		Viti_Levu	2017-04-18			Fiji							http://dx.doi.org/10.1098/rspb.2020.0045	SAMA
preservedSpecimen		17FJ93				Lasioglossum		Lasioglossum ostridorsum (Dorey, Schwarz and Stevens, 2019)			1	-17.6153	178.017				1289		Viti_Levu	2017-04-18			Fiji							http://dx.doi.org/10.1098/rspb.2020.0045	SAMA
preservedSpecimen		17FJ94				Lasioglossum		Lasioglossum kaicolo (Dorey, Schwarz and Stevens, 2019)			1	-17.6153	178.017				1289		Viti_Levu	2017-04-18			Fiji							http://dx.doi.org/10.1098/rspb.2020.0045	SAMA
preservedSpecimen		17FJ95				Lasioglossum		Lasioglossum ostridorsum (Dorey, Schwarz and Stevens, 2019)			1	-17.6153	178.017				1289		Viti_Levu	2017-04-18			Fiji							http://dx.doi.org/10.1098/rspb.2020.0045	SAMA
preservedSpecimen		17FJ96				Lasioglossum		Lasioglossum ostridorsum (Dorey, Schwarz and Stevens, 2019)			1	-17.6153	178.017				1289		Viti_Levu	2017-04-18			Fiji							http://dx.doi.org/10.1098/rspb.2020.0045	SAMA
preservedSpecimen		17FJ97				Lasioglossum		Lasioglossum ostridorsum (Dorey, Schwarz and Stevens, 2019)			1	-17.6153	178.017				1289		Viti_Levu	2017-04-18			Fiji							http://dx.doi.org/10.1098/rspb.2020.0045	SAMA
preservedSpecimen		17FJ98				Lasioglossum		Lasioglossum atritergus (Dorey, Schwarz and Stevens, 2019)			1	-17.6153	178.017				1289		Viti_Levu	2017-04-18			Fiji							http://dx.doi.org/10.1098/rspb.2020.0045	SAMA
preservedSpecimen		17FJ99				Lasioglossum		Lasioglossum atritergus (Dorey, Schwarz and Stevens, 2019)			1	-17.6153	178.017				1289		Viti_Levu	2017-04-18			Fiji							http://dx.doi.org/10.1098/rspb.2020.0045	SAMA
preservedSpecimen		CMR10_B01				Lasioglossum		Lasioglossum fijiense (Perkins and Cheesman, 1928)			1	-18.1547	178.444				9.9		Viti_Levu	2015-05-11			Fiji							http://dx.doi.org/10.1098/rspb.2020.0045	SAMA
preservedSpecimen		CMR100_E12				Lasioglossum		Lasioglossum fijiense (Perkins and Cheesman, 1928)			1	-17.57	177.956				889.1		Viti_Levu	2015-05-05			Fiji							http://dx.doi.org/10.1098/rspb.2020.0045	SAMA
preservedSpecimen		CMR101_F12				Lasioglossum		Lasioglossum tuiwawae (Dorey, Schwarz and Stevens, 2019)			1	-17.5704	177.954				903		Viti_Levu	2015-05-05			Fiji							http://dx.doi.org/10.1098/rspb.2020.0045	SAMA
preservedSpecimen		CMR102_G12				Lasioglossum		Lasioglossum groomi (Dorey, Schwarz and Stevens, 2019)			1	-17.5709	177.943				855.8		Viti_Levu	2015-05-03			Fiji							http://dx.doi.org/10.1098/rspb.2020.0045	SAMA
preservedSpecimen		CMR103_H12				Lasioglossum		Lasioglossum groomi (Dorey, Schwarz and Stevens, 2019)			1	-17.5709	177.943				855.8		Viti_Levu	2015-05-03			Fiji							http://dx.doi.org/10.1098/rspb.2020.0045	SAMA
preservedSpecimen		CMR11_C01				Lasioglossum		Lasioglossum fijiense (Perkins and Cheesman, 1928)			1	-18.1547	178.444				9.9		Viti_Levu	2015-05-11			Fiji							http://dx.doi.org/10.1098/rspb.2020.0045	SAMA
preservedSpecimen		CMR12_D01				Lasioglossum		Lasioglossum fijiense (Perkins and Cheesman, 1928)			1	-18.1547	178.444				9.9		Viti_Levu	2015-05-11			Fiji							http://dx.doi.org/10.1098/rspb.2020.0045	SAMA
preservedSpecimen		CMR127_A04				Lasioglossum		Lasioglossum groomi (Dorey, Schwarz and Stevens, 2019)			1	-17.5827	177.936				922.5		Viti_Levu	2015-05-03			Fiji							http://dx.doi.org/10.1098/rspb.2020.0045	SAMA
preservedSpecimen		CMR128_B04				Lasioglossum		Lasioglossum fijiense (Perkins and Cheesman, 1928)			1	-18.1547	178.444				9.9		Viti_Levu	2015-05-11			Fiji							http://dx.doi.org/10.1098/rspb.2020.0045	SAMA
preservedSpecimen		CMR129_C04				Lasioglossum		Lasioglossum fijiense (Perkins and Cheesman, 1928)			1	-18.1547	178.444				9.9		Viti_Levu	2015-05-11			Fiji							http://dx.doi.org/10.1098/rspb.2020.0045	SAMA
preservedSpecimen		CMR13_E01				Lasioglossum		Lasioglossum fijiense (Perkins and Cheesman, 1928)			1	-18.1547	178.444				9.9		Viti_Levu	2015-05-13			Fiji							http://dx.doi.org/10.1098/rspb.2020.0045	SAMA
preservedSpecimen		CMR130_D04				Lasioglossum		Lasioglossum fijiense (Perkins and Cheesman, 1928)			1	-18.1547	178.444				9.9		Viti_Levu	2015-05-11			Fiji							http://dx.doi.org/10.1098/rspb.2020.0045	SAMA
preservedSpecimen		CMR131_E04				Lasioglossum		Lasioglossum fijiense (Perkins and Cheesman, 1928)			1	-18.1649	178.221				58.9		Viti_Levu	2015-05-12			Fiji							http://dx.doi.org/10.1098/rspb.2020.0045	SAMA
preservedSpecimen		CMR132_F04				Lasioglossum		Lasioglossum fijiense (Perkins and Cheesman, 1928)			1	-18.1649	178.221				58.9		Viti_Levu	2015-05-13			Fiji							http://dx.doi.org/10.1098/rspb.2020.0045	SAMA
preservedSpecimen		CMR136_B05				Lasioglossum		Lasioglossum groomi (Dorey, Schwarz and Stevens, 2019)			1	-17.5827	177.936				922.5		Viti_Levu	2015-05-04			Fiji							http://dx.doi.org/10.1098/rspb.2020.0045	SAMA
preservedSpecimen		CMR137_C05				Lasioglossum		Lasioglossum tuiwawae (Dorey, Schwarz and Stevens, 2019)			1	-17.57	177.956				889.1		Viti_Levu	2015-05-05			Fiji							http://dx.doi.org/10.1098/rspb.2020.0045	SAMA
preservedSpecimen		CMR139_E05				Lasioglossum		Lasioglossum groomi (Dorey, Schwarz and Stevens, 2019)			1	-17.5827	177.936				922.5		Viti_Levu	2015-05-04			Fiji							http://dx.doi.org/10.1098/rspb.2020.0045	SAMA
preservedSpecimen		CMR14_F01				Lasioglossum		Lasioglossum fijiense (Perkins and Cheesman, 1928)			1	-18.1547	178.444				9.9		Viti_Levu	2015-05-13			Fiji							http://dx.doi.org/10.1098/rspb.2020.0045	SAMA
preservedSpecimen		CMR142_H05				Lasioglossum		Lasioglossum groomi (Dorey, Schwarz and Stevens, 2019)			1	-17.5827	177.936				922.5		Viti_Levu	2015-05-04			Fiji							http://dx.doi.org/10.1098/rspb.2020.0045	SAMA
preservedSpecimen		CMR143_A06				Lasioglossum		Lasioglossum groomi (Dorey, Schwarz and Stevens, 2019)			1	-17.5827	177.936				922.5		Viti_Levu	2015-05-04			Fiji							http://dx.doi.org/10.1098/rspb.2020.0045	SAMA
preservedSpecimen		CMR144_B06				Lasioglossum		Lasioglossum tuiwawae (Dorey, Schwarz and Stevens, 2019)			1	-17.57	177.956				889.1		Viti_Levu	2015-05-05			Fiji							http://dx.doi.org/10.1098/rspb.2020.0045	SAMA
preservedSpecimen		CMR146_D06				Lasioglossum		Lasioglossum tuiwawae (Dorey, Schwarz and Stevens, 2019)			1	-17.57	177.956				889.1		Viti_Levu	2015-05-05			Fiji							http://dx.doi.org/10.1098/rspb.2020.0045	SAMA
preservedSpecimen		CMR147_E06				Lasioglossum		Lasioglossum tuiwawae (Dorey, Schwarz and Stevens, 2019)			1	-17.57	177.956				889.1		Viti_Levu	2015-05-05			Fiji							http://dx.doi.org/10.1098/rspb.2020.0045	SAMA
preservedSpecimen		CMR148_F06				Lasioglossum		Lasioglossum fijiense (Perkins and Cheesman, 1928)			1	-18.1547	178.444				9.9		Viti_Levu	2015-05-11			Fiji							http://dx.doi.org/10.1098/rspb.2020.0045	SAMA
preservedSpecimen		CMR15_G01				Lasioglossum		Lasioglossum fijiense (Perkins and Cheesman, 1928)			1	-18.1547	178.444				9.9		Viti_Levu	2015-05-05			Fiji							http://dx.doi.org/10.1098/rspb.2020.0045	SAMA
preservedSpecimen		CMR159_A08				Lasioglossum		Lasioglossum tuiwawae (Dorey, Schwarz and Stevens, 2019)			1	-17.57	177.956				889.1		Viti_Levu	2015-05-05			Fiji							http://dx.doi.org/10.1098/rspb.2020.0045	SAMA
preservedSpecimen		CMR16_A02				Lasioglossum		Lasioglossum fijiense (Perkins and Cheesman, 1928)			1	-18.1547	178.444				9.9		Viti_Levu	2015-04-01			Fiji							http://dx.doi.org/10.1098/rspb.2020.0045	SAMA
preservedSpecimen		CMR160_B08				Lasioglossum		Lasioglossum tuiwawae (Dorey, Schwarz and Stevens, 2019)			1	-17.57	177.956				889.1		Viti_Levu	2015-05-05			Fiji							http://dx.doi.org/10.1098/rspb.2020.0045	SAMA
preservedSpecimen		CMR161_C08				Lasioglossum		Lasioglossum tuiwawae (Dorey, Schwarz and Stevens, 2019)			1	-17.57	177.956				889.1		Viti_Levu	2015-05-11			Fiji							http://dx.doi.org/10.1098/rspb.2020.0045	SAMA
preservedSpecimen		CMR166_H08				Lasioglossum		Lasioglossum groomi (Dorey, Schwarz and Stevens, 2019)			1	-17.5704	177.954				903		Viti_Levu	2015-05-12			Fiji							http://dx.doi.org/10.1098/rspb.2020.0045	SAMA
preservedSpecimen		CMR167_A09				Lasioglossum		Lasioglossum fijiense (Perkins and Cheesman, 1928)			1	-18.1547	178.444				9.9		Viti_Levu	2015-05-11			Fiji							http://dx.doi.org/10.1098/rspb.2020.0045	SAMA
preservedSpecimen		CMR168_B09				Lasioglossum		Lasioglossum fijiense (Perkins and Cheesman, 1928)			1	-18.1649	178.221				58.9		Viti_Levu	2015-05-03			Fiji							http://dx.doi.org/10.1098/rspb.2020.0045	SAMA
preservedSpecimen		CMR17_B02				Lasioglossum		Lasioglossum fijiense (Perkins and Cheesman, 1928)			1	-18.1547	178.444				9.9		Viti_Levu	2015-04-01			Fiji							http://dx.doi.org/10.1098/rspb.2020.0045	SAMA
preservedSpecimen		CMR171_E09				Lasioglossum		Lasioglossum groomi (Dorey, Schwarz and Stevens, 2019)			1	-17.5827	177.936				922.5		Viti_Levu	2015-05-11			Fiji							http://dx.doi.org/10.1098/rspb.2020.0045	SAMA
preservedSpecimen		CMR177_C10				Lasioglossum		Lasioglossum atritergus (Dorey, Schwarz and Stevens, 2019)			1	-17.5851	177.92				1004		Viti_Levu	2015-04-01			Fiji							http://dx.doi.org/10.1098/rspb.2020.0045	SAMA
preservedSpecimen		CMR18_C02				Lasioglossum		Lasioglossum fijiense (Perkins and Cheesman, 1928)			1	-18.1547	178.444				9.9		Viti_Levu	2015-05-11			Fiji							http://dx.doi.org/10.1098/rspb.2020.0045	SAMA
preservedSpecimen		CMR181_G10				Lasioglossum		Lasioglossum atritergus (Dorey, Schwarz and Stevens, 2019)			1	-17.5851	177.92				1004		Viti_Levu	2015-05-04			Fiji							http://dx.doi.org/10.1098/rspb.2020.0045	SAMA
preservedSpecimen		CMR182_H10				Lasioglossum		Lasioglossum atritergus (Dorey, Schwarz and Stevens, 2019)			1	-17.5851	177.92				1004		Viti_Levu	2015-05-11			Fiji							http://dx.doi.org/10.1098/rspb.2020.0045	SAMA
preservedSpecimen		CMR184_B11				Lasioglossum		Lasioglossum groomi (Dorey, Schwarz and Stevens, 2019)			1	-17.5827	177.936				922.5		Viti_Levu	2015-05-11			Fiji							http://dx.doi.org/10.1098/rspb.2020.0045	SAMA
preservedSpecimen		CMR19_D02				Lasioglossum		Lasioglossum fijiense (Perkins and Cheesman, 1928)			1	-18.1547	178.444				9.9		Viti_Levu	2015-05-04			Fiji							http://dx.doi.org/10.1098/rspb.2020.0045	SAMA
preservedSpecimen		CMR20_E02				Lasioglossum		Lasioglossum fijiense (Perkins and Cheesman, 1928)			1	-18.1547	178.444				10		Viti_Levu	2015-05-04			Fiji							http://dx.doi.org/10.1098/rspb.2020.0045	SAMA
preservedSpecimen		CMR21_F02				Lasioglossum		Lasioglossum fijiense (Perkins and Cheesman, 1928)			1	-18.1547	178.444				9.9		Viti_Levu	2015-05-03			Fiji							http://dx.doi.org/10.1098/rspb.2020.0045	SAMA
preservedSpecimen		CMR22_G02				Lasioglossum		Lasioglossum fijiense (Perkins and Cheesman, 1928)			1	-18.1547	178.444				9.9		Viti_Levu	2015-05-05			Fiji							http://dx.doi.org/10.1098/rspb.2020.0045	SAMA
preservedSpecimen		CMR23_H02				Lasioglossum		Lasioglossum fijiense (Perkins and Cheesman, 1928)			1	-18.1547	178.444				9.9		Viti_Levu	2015-05-05			Fiji							http://dx.doi.org/10.1098/rspb.2020.0045	SAMA
preservedSpecimen		CMR24_A03				Lasioglossum		Lasioglossum groomi (Dorey, Schwarz and Stevens, 2019)			1	-17.5827	177.936				922.5		Viti_Levu	2015-05-05			Fiji							http://dx.doi.org/10.1098/rspb.2020.0045	SAMA
preservedSpecimen		CMR25_B03				Lasioglossum		Lasioglossum groomi (Dorey, Schwarz and Stevens, 2019)			1	-17.5827	177.936				922.5		Viti_Levu	2015-05-05			Fiji							http://dx.doi.org/10.1098/rspb.2020.0045	SAMA
preservedSpecimen		CMR27_D03				Lasioglossum		Lasioglossum groomi (Dorey, Schwarz and Stevens, 2019)			1	-17.5827	177.936				922.5		Viti_Levu	2015-05-05			Fiji							http://dx.doi.org/10.1098/rspb.2020.0045	SAMA
preservedSpecimen		CMR28_E03				Lasioglossum		Lasioglossum groomi (Dorey, Schwarz and Stevens, 2019)			1	-17.5827	177.936				922.5		Viti_Levu	2015-05-06			Fiji							http://dx.doi.org/10.1098/rspb.2020.0045	SAMA
preservedSpecimen		CMR29_F03				Lasioglossum		Lasioglossum groomi (Dorey, Schwarz and Stevens, 2019)			1	-17.5827	177.936				922.5		Viti_Levu	2015-05-07			Fiji							http://dx.doi.org/10.1098/rspb.2020.0045	SAMA
preservedSpecimen		CMR30_G03				Lasioglossum		Lasioglossum groomi (Dorey, Schwarz and Stevens, 2019)			1	-17.5827	177.936				922.5		Viti_Levu	2015-05-06			Fiji							http://dx.doi.org/10.1098/rspb.2020.0045	SAMA
preservedSpecimen		CMR33_B04				Lasioglossum		Lasioglossum groomi (Dorey, Schwarz and Stevens, 2019)			1	-17.5827	177.936				922.5		Viti_Levu	2015-05-06			Fiji							http://dx.doi.org/10.1098/rspb.2020.0045	SAMA
preservedSpecimen		CMR35_D04				Lasioglossum		Lasioglossum groomi (Dorey, Schwarz and Stevens, 2019)			1	-17.5709	177.943				855.8		Viti_Levu	2015-05-06			Fiji							http://dx.doi.org/10.1098/rspb.2020.0045	SAMA
preservedSpecimen		CMR36_E04				Lasioglossum		Lasioglossum atritergus (Dorey, Schwarz and Stevens, 2019)			1	-17.5709	177.943				855.8		Viti_Levu	2015-05-06			Fiji							http://dx.doi.org/10.1098/rspb.2020.0045	SAMA
preservedSpecimen		CMR37_F04				Lasioglossum		Lasioglossum groomi (Dorey, Schwarz and Stevens, 2019)			1	-17.5827	177.936				922.5		Viti_Levu	2015-05-06			Fiji							http://dx.doi.org/10.1098/rspb.2020.0045	SAMA
preservedSpecimen		CMR38_G04				Lasioglossum		Lasioglossum fijiense (Perkins and Cheesman, 1928)			1	-18.1649	178.221				58.9		Viti_Levu	2015-05-06			Fiji							http://dx.doi.org/10.1098/rspb.2020.0045	SAMA
preservedSpecimen		CMR39_H04				Lasioglossum		Lasioglossum fijiense (Perkins and Cheesman, 1928)			1	-18.1649	178.221				58.9		Viti_Levu	2015-05-06			Fiji							http://dx.doi.org/10.1098/rspb.2020.0045	SAMA
preservedSpecimen		CMR40_A05				Lasioglossum		Lasioglossum groomi (Dorey, Schwarz and Stevens, 2019)			1	-17.5827	177.936				922.5		Viti_Levu	2015-05-06			Fiji							http://dx.doi.org/10.1098/rspb.2020.0045	SAMA
preservedSpecimen		CMR41_B05				Lasioglossum		Lasioglossum groomi (Dorey, Schwarz and Stevens, 2019)			1	-17.5827	177.936				922.5		Viti_Levu	2015-05-06			Fiji							http://dx.doi.org/10.1098/rspb.2020.0045	SAMA
preservedSpecimen		CMR42_C05				Lasioglossum		Lasioglossum groomi (Dorey, Schwarz and Stevens, 2019)			1	-17.5827	177.936				922.5		Viti_Levu	2015-05-04			Fiji							http://dx.doi.org/10.1098/rspb.2020.0045	SAMA
preservedSpecimen		CMR43_D05				Lasioglossum		Lasioglossum groomi (Dorey, Schwarz and Stevens, 2019)			1	-17.5827	177.936				922.5		Viti_Levu	2015-05-04			Fiji							http://dx.doi.org/10.1098/rspb.2020.0045	SAMA
preservedSpecimen		CMR44_E05				Lasioglossum		Lasioglossum groomi (Dorey, Schwarz and Stevens, 2019)			1	-17.57	177.956				889.1		Viti_Levu	2015-05-05			Fiji							http://dx.doi.org/10.1098/rspb.2020.0045	SAMA
preservedSpecimen		CMR46_G05				Lasioglossum		Lasioglossum groomi (Dorey, Schwarz and Stevens, 2019)			1	-17.57	177.956				889.1		Viti_Levu	2015-05-05			Fiji							http://dx.doi.org/10.1098/rspb.2020.0045	SAMA
preservedSpecimen		CMR47_H05				Lasioglossum		Lasioglossum fijiense (Perkins and Cheesman, 1928)			1	-17.57	177.956				889.1		Viti_Levu	2015-05-05			Fiji							http://dx.doi.org/10.1098/rspb.2020.0045	SAMA
preservedSpecimen		CMR48_A06				Lasioglossum		Lasioglossum groomi (Dorey, Schwarz and Stevens, 2019)			1	-17.57	177.956				889.1		Viti_Levu	2015-05-12			Fiji							http://dx.doi.org/10.1098/rspb.2020.0045	SAMA
preservedSpecimen		CMR49_B06				Lasioglossum		Lasioglossum groomi (Dorey, Schwarz and Stevens, 2019)			1	-17.57	177.956				889.1		Viti_Levu	2015-05-05			Fiji							http://dx.doi.org/10.1098/rspb.2020.0045	SAMA
preservedSpecimen		CMR50_C06				Lasioglossum		Lasioglossum groomi (Dorey, Schwarz and Stevens, 2019)			1	-17.57	177.956				889.1		Viti_Levu	2015-05-05			Fiji							http://dx.doi.org/10.1098/rspb.2020.0045	SAMA
preservedSpecimen		CMR51_D06				Lasioglossum		Lasioglossum groomi (Dorey, Schwarz and Stevens, 2019)			1	-17.57	177.956				889.1		Viti_Levu	2015-05-05			Fiji							http://dx.doi.org/10.1098/rspb.2020.0045	SAMA
preservedSpecimen		CMR52_E06				Lasioglossum		Lasioglossum groomi (Dorey, Schwarz and Stevens, 2019)			1	-17.57	177.956				889.1		Viti_Levu	2015-05-05			Fiji							http://dx.doi.org/10.1098/rspb.2020.0045	SAMA
preservedSpecimen		CMR53_F06				Lasioglossum		Lasioglossum groomi (Dorey, Schwarz and Stevens, 2019)			1	-17.5827	177.936				922.5		Viti_Levu	2015-05-05			Fiji							http://dx.doi.org/10.1098/rspb.2020.0045	SAMA
preservedSpecimen		CMR54_G06				Lasioglossum		Lasioglossum groomi (Dorey, Schwarz and Stevens, 2019)			1	-17.5827	177.936				922.5		Viti_Levu	2015-05-05			Fiji							http://dx.doi.org/10.1098/rspb.2020.0045	SAMA
preservedSpecimen		CMR55_H06				Lasioglossum		Lasioglossum fijiense (Perkins and Cheesman, 1928)			1	-17.57	177.956				889.1		Viti_Levu	2015-05-04			Fiji							http://dx.doi.org/10.1098/rspb.2020.0045	SAMA
preservedSpecimen		CMR56_A07				Lasioglossum		Lasioglossum fijiense (Perkins and Cheesman, 1928)			1	-17.57	177.956				889.1		Viti_Levu	2015-05-12			Fiji							http://dx.doi.org/10.1098/rspb.2020.0045	SAMA
preservedSpecimen		CMR57_B07				Lasioglossum		Lasioglossum fijiense (Perkins and Cheesman, 1928)			1	-17.57	177.956				889.1		Viti_Levu	2015-05-05			Fiji							http://dx.doi.org/10.1098/rspb.2020.0045	SAMA
preservedSpecimen		CMR58_C07				Lasioglossum		Lasioglossum fijiense (Perkins and Cheesman, 1928)			1	-17.57	177.956				889.1		Viti_Levu	2015-05-06			Fiji							http://dx.doi.org/10.1098/rspb.2020.0045	SAMA
preservedSpecimen		CMR59_D07				Lasioglossum		Lasioglossum fijiense (Perkins and Cheesman, 1928)			1	-17.57	177.956				889.1		Viti_Levu	2015-05-06			Fiji							http://dx.doi.org/10.1098/rspb.2020.0045	SAMA
preservedSpecimen		CMR6_H10				Lasioglossum		Lasioglossum fijiense (Perkins and Cheesman, 1928)			1	-18.1649	178.221				58.9		Viti_Levu	2015-05-04			Fiji							http://dx.doi.org/10.1098/rspb.2020.0045	SAMA
preservedSpecimen		CMR60_E07				Lasioglossum		Lasioglossum fijiense (Perkins and Cheesman, 1928)			1	-17.57	177.956				889.1		Viti_Levu	2015-05-06			Fiji							http://dx.doi.org/10.1098/rspb.2020.0045	SAMA
preservedSpecimen		CMR61_F07				Lasioglossum		Lasioglossum fijiense (Perkins and Cheesman, 1928)			1	-17.57	177.956				889.1		Viti_Levu	2015-05-06			Fiji							http://dx.doi.org/10.1098/rspb.2020.0045	SAMA
preservedSpecimen		CMR62_G07				Lasioglossum		Lasioglossum fijiense (Perkins and Cheesman, 1928)			1	-17.57	177.956				889.1		Viti_Levu	2015-05-07			Fiji							http://dx.doi.org/10.1098/rspb.2020.0045	SAMA
preservedSpecimen		CMR63_H07				Lasioglossum		Lasioglossum fijiense (Perkins and Cheesman, 1928)			1	-17.57	177.956				889.1		Viti_Levu	2015-05-12			Fiji							http://dx.doi.org/10.1098/rspb.2020.0045	SAMA
preservedSpecimen		CMR65_B08				Lasioglossum		Lasioglossum fijiense (Perkins and Cheesman, 1928)			1	-17.5827	177.936				922.5		Viti_Levu	2015-05-04			Fiji							http://dx.doi.org/10.1098/rspb.2020.0045	SAMA
preservedSpecimen		CMR66_C08				Lasioglossum		Lasioglossum groomi (Dorey, Schwarz and Stevens, 2019)			1	-17.5827	177.936				922.5		Viti_Levu	2015-05-05			Fiji							http://dx.doi.org/10.1098/rspb.2020.0045	SAMA
preservedSpecimen		CMR67_D08				Lasioglossum		Lasioglossum tuiwawae (Dorey, Schwarz and Stevens, 2019)			1	-17.57	177.956				889.1		Viti_Levu	2015-05-05			Fiji							http://dx.doi.org/10.1098/rspb.2020.0045	SAMA
preservedSpecimen		CMR68_E08				Lasioglossum		Lasioglossum tuiwawae (Dorey, Schwarz and Stevens, 2019)			1	-17.57	177.956				889.1		Viti_Levu	2015-05-06			Fiji							http://dx.doi.org/10.1098/rspb.2020.0045	SAMA
preservedSpecimen		CMR69_F08				Lasioglossum		Lasioglossum tuiwawae (Dorey, Schwarz and Stevens, 2019)			1	-17.57	177.956				889.1		Viti_Levu	2015-05-06			Fiji							http://dx.doi.org/10.1098/rspb.2020.0045	SAMA
preservedSpecimen		CMR7_H07				Lasioglossum		Lasioglossum fijiense (Perkins and Cheesman, 1928)			1	-18.1649	178.221				58.9		Viti_Levu	2015-04-01			Fiji							http://dx.doi.org/10.1098/rspb.2020.0045	SAMA
preservedSpecimen		CMR70_G08				Lasioglossum		Lasioglossum fijiense (Perkins and Cheesman, 1928)			1	-17.57	177.956				889.1		Viti_Levu	2015-05-04			Fiji							http://dx.doi.org/10.1098/rspb.2020.0045	SAMA
preservedSpecimen		CMR71_H08				Lasioglossum		Lasioglossum fijiense (Perkins and Cheesman, 1928)			1	-17.57	177.956				889.1		Viti_Levu	2015-05-05			Fiji							http://dx.doi.org/10.1098/rspb.2020.0045	SAMA
preservedSpecimen		CMR72_A09				Lasioglossum		Lasioglossum tuiwawae (Dorey, Schwarz and Stevens, 2019)			1	-17.57	177.956				889.1		Viti_Levu	2015-05-05			Fiji							http://dx.doi.org/10.1098/rspb.2020.0045	SAMA
preservedSpecimen		CMR73_B09				Lasioglossum		Lasioglossum fijiense (Perkins and Cheesman, 1928)			1	-17.57	177.956				889.1		Viti_Levu	2015-05-11			Fiji							http://dx.doi.org/10.1098/rspb.2020.0045	SAMA
preservedSpecimen		CMR74_C09				Lasioglossum		Lasioglossum fijiense (Perkins and Cheesman, 1928)			1	-17.57	177.956				889.1		Viti_Levu	2015-04-01			Fiji							http://dx.doi.org/10.1098/rspb.2020.0045	SAMA
preservedSpecimen		CMR75_D09				Lasioglossum		Lasioglossum fijiense (Perkins and Cheesman, 1928)			1	-17.57	177.956				889.1		Viti_Levu	2015-04-01			Fiji							http://dx.doi.org/10.1098/rspb.2020.0045	SAMA
preservedSpecimen		CMR77_F09				Lasioglossum		Lasioglossum groomi (Dorey, Schwarz and Stevens, 2019)			1	-17.5827	177.936				922.5		Viti_Levu	2015-04-01			Fiji							http://dx.doi.org/10.1098/rspb.2020.0045	SAMA
preservedSpecimen		CMR8_H08				Lasioglossum		Lasioglossum fijiense (Perkins and Cheesman, 1928)			1	-18.1649	178.221				58.9		Viti_Levu	2015-04-01			Fiji							http://dx.doi.org/10.1098/rspb.2020.0045	SAMA
preservedSpecimen		CMR83_D10				Lasioglossum		Lasioglossum tuiwawae (Dorey, Schwarz and Stevens, 2019)			1	-17.57	177.956				889.1		Viti_Levu	2015-04-01			Fiji							http://dx.doi.org/10.1098/rspb.2020.0045	SAMA
preservedSpecimen		CMR84_E10				Lasioglossum		Lasioglossum tuiwawae (Dorey, Schwarz and Stevens, 2019)			1	-17.57	177.956				889.1		Viti_Levu	2015-04-01			Fiji							http://dx.doi.org/10.1098/rspb.2020.0045	SAMA
preservedSpecimen		CMR85_F10				Lasioglossum		Lasioglossum tuiwawae (Dorey, Schwarz and Stevens, 2019)			1	-17.57	177.956				889.1		Viti_Levu	2015-04-01			Fiji							http://dx.doi.org/10.1098/rspb.2020.0045	SAMA
preservedSpecimen		CMR86_G10				Lasioglossum		Lasioglossum tuiwawae (Dorey, Schwarz and Stevens, 2019)			1	-17.57	177.956				889.1		Viti_Levu	2015-04-01			Fiji							http://dx.doi.org/10.1098/rspb.2020.0045	SAMA
preservedSpecimen		CMR87_H10				Lasioglossum		Lasioglossum groomi (Dorey, Schwarz and Stevens, 2019)			1	-17.57	177.956				889.1		Viti_Levu	2015-04-01			Fiji							http://dx.doi.org/10.1098/rspb.2020.0045	SAMA
preservedSpecimen		CMR89_B11				Lasioglossum		Lasioglossum groomi (Dorey, Schwarz and Stevens, 2019)			1	-17.5827	177.936				922.5		Viti_Levu	2015-04-01			Fiji							http://dx.doi.org/10.1098/rspb.2020.0045	SAMA
preservedSpecimen		CMR9_A01				Lasioglossum		Lasioglossum fijiense (Perkins and Cheesman, 1928)			1	-18.1547	178.444				9.9		Viti_Levu	2015-04-01			Fiji							http://dx.doi.org/10.1098/rspb.2020.0045	SAMA
preservedSpecimen		CMR90_C11				Lasioglossum		Lasioglossum groomi (Dorey, Schwarz and Stevens, 2019)			1	-17.5827	177.936				922.5		Viti_Levu	2015-04-01			Fiji							http://dx.doi.org/10.1098/rspb.2020.0045	SAMA
preservedSpecimen		CMR91_D11				Lasioglossum		Lasioglossum tuiwawae (Dorey, Schwarz and Stevens, 2019)			1	-17.57	177.956				889.1		Viti_Levu	2015-04-01			Fiji							http://dx.doi.org/10.1098/rspb.2020.0045	SAMA
preservedSpecimen		CMR92_E11				Lasioglossum		Lasioglossum tuiwawae (Dorey, Schwarz and Stevens, 2019)			1	-17.57	177.956				889.1		Viti_Levu	2015-04-01			Fiji							http://dx.doi.org/10.1098/rspb.2020.0045	SAMA
preservedSpecimen		CMR93_F11				Lasioglossum		Lasioglossum tuiwawae (Dorey, Schwarz and Stevens, 2019)			1	-17.57	177.956				889.1		Viti_Levu	2015-04-01			Fiji							http://dx.doi.org/10.1098/rspb.2020.0045	SAMA
preservedSpecimen		CMR94_G11				Lasioglossum		Lasioglossum tuiwawae (Dorey, Schwarz and Stevens, 2019)			1	-17.57	177.956				889.1		Viti_Levu	2015-04-01			Fiji							http://dx.doi.org/10.1098/rspb.2020.0045	SAMA
preservedSpecimen		CMR96_A12				Lasioglossum		Lasioglossum tuiwawae (Dorey, Schwarz and Stevens, 2019)			1	-17.5827	177.936				922.5		Viti_Levu	2015-04-01			Fiji							http://dx.doi.org/10.1098/rspb.2020.0045	SAMA
preservedSpecimen		CMR97_B12				Lasioglossum		Lasioglossum groomi (Dorey, Schwarz and Stevens, 2019)			1	-17.5827	177.936				922.5		Viti_Levu	2015-04-01			Fiji							http://dx.doi.org/10.1098/rspb.2020.0045	SAMA
preservedSpecimen		CMR98_C12				Lasioglossum		Lasioglossum tuiwawae (Dorey, Schwarz and Stevens, 2019)			1	-17.57	177.956				889.1		Viti_Levu	2015-04-01			Fiji							http://dx.doi.org/10.1098/rspb.2020.0045	SAMA
preservedSpecimen		CMR99_D12				Lasioglossum		Lasioglossum tuiwawae (Dorey, Schwarz and Stevens, 2019)			1	-17.57	177.956				889.1		Viti_Levu	2015-04-01			Fiji							http://dx.doi.org/10.1098/rspb.2020.0045	SAMA
preservedSpecimen		Damk01				Lasioglossum		Lasioglossum kaicolo (Dorey, Schwarz and Stevens, 2019)			1	-17.7371	178.062				915.7		Viti_Levu	2015-04-01			Fiji							http://dx.doi.org/10.1098/rspb.2020.0045	SAMA
preservedSpecimen		Damp02				Lasioglossum		Lasioglossum kaicolo (Dorey, Schwarz and Stevens, 2019)			1	-17.7363	178.055				922.3		Viti_Levu	2015-04-01			Fiji							http://dx.doi.org/10.1098/rspb.2020.0045	SAMA
preservedSpecimen		ED1_C01				Lasioglossum		Lasioglossum tuiwawae (Dorey, Schwarz and Stevens, 2019)			1	-17.5827	177.936				922.5		Viti_Levu	2015-04-01			Fiji							http://dx.doi.org/10.1098/rspb.2020.0045	SAMA
preservedSpecimen		ED10_F10				Lasioglossum		Lasioglossum tuiwawae (Dorey, Schwarz and Stevens, 2019)			1	-17.5827	177.936				922.5		Viti_Levu	2015-04-01			Fiji							http://dx.doi.org/10.1098/rspb.2020.0045	SAMA
preservedSpecimen		ED11_F11				Lasioglossum		Lasioglossum tuiwawae (Dorey, Schwarz and Stevens, 2019)			1	-17.5827	177.936				922.5		Viti_Levu	2015-04-01			Fiji							http://dx.doi.org/10.1098/rspb.2020.0045	SAMA
preservedSpecimen		ED12_F12				Lasioglossum		Lasioglossum tuiwawae (Dorey, Schwarz and Stevens, 2019)			1	-17.5827	177.936				922.5		Viti_Levu	2015-04-01			Fiji							http://dx.doi.org/10.1098/rspb.2020.0045	SAMA
preservedSpecimen		ED2_C02				Lasioglossum		Lasioglossum tuiwawae (Dorey, Schwarz and Stevens, 2019)			1	-17.5827	177.936				922.5		Viti_Levu	2015-04-01			Fiji							http://dx.doi.org/10.1098/rspb.2020.0045	SAMA
preservedSpecimen		ED20_C10				Lasioglossum		Lasioglossum fijiense (Perkins and Cheesman, 1928)			1	-17.625	177.984				732.1		Viti_Levu	2015-04-01			Fiji							http://dx.doi.org/10.1098/rspb.2020.0045	SAMA
preservedSpecimen		ED24_D02				Lasioglossum		Lasioglossum tuiwawae (Dorey, Schwarz and Stevens, 2019)			1	-17.5827	177.936				922.5		Viti_Levu	2015-04-01			Fiji							http://dx.doi.org/10.1098/rspb.2020.0045	SAMA
preservedSpecimen		ED27_E12				Lasioglossum		Lasioglossum nadarivatu (Dorey, Schwarz and Stevens, 2019)			1	-17.5851	177.92				1004		Viti_Levu	2015-04-01			Fiji							http://dx.doi.org/10.1098/rspb.2020.0045	SAMA
preservedSpecimen		ED29_F02				Lasioglossum		Lasioglossum tuiwawae (Dorey, Schwarz and Stevens, 2019)			1	-17.5827	177.936				922.5		Viti_Levu	2015-04-01			Fiji							http://dx.doi.org/10.1098/rspb.2020.0045	SAMA
preservedSpecimen		ED3_C03				Lasioglossum		Lasioglossum tuiwawae (Dorey, Schwarz and Stevens, 2019)			1	-17.5827	177.936				922.5		Viti_Levu	2015-04-01			Fiji							http://dx.doi.org/10.1098/rspb.2020.0045	SAMA
preservedSpecimen		ED31_F04				Lasioglossum		Lasioglossum groomi (Dorey, Schwarz and Stevens, 2019)			1	-17.5851	177.92				1004		Viti_Levu	2015-04-01			Fiji							http://dx.doi.org/10.1098/rspb.2020.0045	SAMA
preservedSpecimen		ED32_F05				Lasioglossum		Lasioglossum tuiwawae (Dorey, Schwarz and Stevens, 2019)			1	-17.5808	177.939				925.8		Viti_Levu	2015-04-01			Fiji							http://dx.doi.org/10.1098/rspb.2020.0045	SAMA
preservedSpecimen		ED33_F06				Lasioglossum		Lasioglossum fijiense (Perkins and Cheesman, 1928)			1	-17.5861	177.964				735.7		Viti_Levu	2015-04-01			Fiji							http://dx.doi.org/10.1098/rspb.2020.0045	SAMA
preservedSpecimen		ED34_F07				Lasioglossum		Lasioglossum atritergus (Dorey, Schwarz and Stevens, 2019)			1	-17.5851	177.92				1004		Viti_Levu	2015-04-01			Fiji							http://dx.doi.org/10.1098/rspb.2020.0045	SAMA
preservedSpecimen		ED35_F08				Lasioglossum		Lasioglossum groomi (Dorey, Schwarz and Stevens, 2019)			1	-17.5851	177.92				1004		Viti_Levu	2015-04-01			Fiji							http://dx.doi.org/10.1098/rspb.2020.0045	SAMA
preservedSpecimen		ED36_F09				Lasioglossum		Lasioglossum tuiwawae (Dorey, Schwarz and Stevens, 2019)			1	-17.57	177.956				889.1		Viti_Levu	2015-04-01			Fiji							http://dx.doi.org/10.1098/rspb.2020.0045	SAMA
preservedSpecimen		ED37_F10				Lasioglossum		Lasioglossum tuiwawae (Dorey, Schwarz and Stevens, 2019)			1	-17.57	177.956				889.1		Viti_Levu	2015-04-01			Fiji							http://dx.doi.org/10.1098/rspb.2020.0045	SAMA
preservedSpecimen		ED38_F11				Lasioglossum		Lasioglossum tuiwawae (Dorey, Schwarz and Stevens, 2019)			1	-17.57	177.956				889.1		Viti_Levu	2015-04-01			Fiji							http://dx.doi.org/10.1098/rspb.2020.0045	SAMA
preservedSpecimen		ED39_C12				Lasioglossum		Lasioglossum nadarivatu (Dorey, Schwarz and Stevens, 2019)			1	-17.5851	177.92				1004		Viti_Levu	2015-04-01			Fiji							http://dx.doi.org/10.1098/rspb.2020.0045	SAMA
preservedSpecimen		ED4_C04				Lasioglossum		Lasioglossum tuiwawae (Dorey, Schwarz and Stevens, 2019)			1	-17.5827	177.936				922.5		Viti_Levu	2015-04-01			Fiji							http://dx.doi.org/10.1098/rspb.2020.0045	SAMA
preservedSpecimen		ED40_D01				Lasioglossum		Lasioglossum groomi (Dorey, Schwarz and Stevens, 2019)			1	-17.5851	177.92				1004		Viti_Levu	2015-04-01			Fiji							http://dx.doi.org/10.1098/rspb.2020.0045	SAMA
preservedSpecimen		ED42_D03				Lasioglossum		Lasioglossum tuiwawae (Dorey, Schwarz and Stevens, 2019)			1	-17.5827	177.936				922.5		Viti_Levu	2015-04-01			Fiji							http://dx.doi.org/10.1098/rspb.2020.0045	SAMA
preservedSpecimen		ED43_D04				Lasioglossum		Lasioglossum tuiwawae (Dorey, Schwarz and Stevens, 2019)			1	-17.5827	177.936				922.5		Viti_Levu	2015-04-01			Fiji							http://dx.doi.org/10.1098/rspb.2020.0045	SAMA
preservedSpecimen		ED44_D05				Lasioglossum		Lasioglossum tuiwawae (Dorey, Schwarz and Stevens, 2019)			1	-17.5851	177.92				1004		Viti_Levu	2015-04-01			Fiji							http://dx.doi.org/10.1098/rspb.2020.0045	SAMA
preservedSpecimen		ED48_D09				Lasioglossum		Lasioglossum tuiwawae (Dorey, Schwarz and Stevens, 2019)			1	-17.5851	177.92				1004		Viti_Levu	2015-04-01			Fiji							http://dx.doi.org/10.1098/rspb.2020.0045	SAMA
preservedSpecimen		ED5_C05				Lasioglossum		Lasioglossum tuiwawae (Dorey, Schwarz and Stevens, 2019)			1	-17.5827	177.936				922.5		Viti_Levu	2015-04-01			Fiji							http://dx.doi.org/10.1098/rspb.2020.0045	SAMA
preservedSpecimen		ED6_C06				Lasioglossum		Lasioglossum tuiwawae (Dorey, Schwarz and Stevens, 2019)			1	-17.5827	177.936				922.5		Viti_Levu	2015-04-01			Fiji							http://dx.doi.org/10.1098/rspb.2020.0045	SAMA
preservedSpecimen		ED7_F07				Lasioglossum		Lasioglossum tuiwawae (Dorey, Schwarz and Stevens, 2019)			1	-17.5827	177.936				922.5		Viti_Levu	2015-04-01			Fiji							http://dx.doi.org/10.1098/rspb.2020.0045	SAMA
preservedSpecimen		ED8_F08				Lasioglossum		Lasioglossum tuiwawae (Dorey, Schwarz and Stevens, 2019)			1	-17.5827	177.936				922.5		Viti_Levu	2015-04-01			Fiji							http://dx.doi.org/10.1098/rspb.2020.0045	SAMA
preservedSpecimen		ED9_F09				Lasioglossum		Lasioglossum tuiwawae (Dorey, Schwarz and Stevens, 2019)			1	-17.5827	177.936				922.5		Viti_Levu	2015-04-01			Fiji							http://dx.doi.org/10.1098/rspb.2020.0045	SAMA
preservedSpecimen		Mbtb01				Lasioglossum		Lasioglossum Species S			1	-17.6865	177.544				1100.1		Viti_Levu	2010-07-28			Fiji							http://dx.doi.org/10.1098/rspb.2020.0045	SAMA
preservedSpecimen		Mbtd18				Lasioglossum		Lasioglossum terminale (Dorey, Schwarz and Stevens, 2019)			1	-17.6865	177.544				1100.1		Viti_Levu	2010-07-28			Fiji							http://dx.doi.org/10.1098/rspb.2020.0045	SAMA
preservedSpecimen		Mbtd25				Lasioglossum		Lasioglossum terminale (Dorey, Schwarz and Stevens, 2019)			1	-17.6865	177.544				1100.1		Viti_Levu	2010-07-28			Fiji							http://dx.doi.org/10.1098/rspb.2020.0045	SAMA
preservedSpecimen		Mbte02				Lasioglossum		Lasioglossum terminale (Dorey, Schwarz and Stevens, 2019)			1	-17.6865	177.544				1100.1		Viti_Levu	2010-07-28			Fiji							http://dx.doi.org/10.1098/rspb.2020.0045	SAMA
preservedSpecimen		Mbte03				Lasioglossum		Lasioglossum terminale (Dorey, Schwarz and Stevens, 2019)			1	-17.6865	177.544				1100.1		Viti_Levu	2010-07-28			Fiji							http://dx.doi.org/10.1098/rspb.2020.0045	SAMA
preservedSpecimen		Mbtj01				Lasioglossum		Lasioglossum Species G			1	-17.6793	177.543				869		Viti_Levu	2010-07-28			Fiji							http://dx.doi.org/10.1098/rspb.2020.0045	SAMA
preservedSpecimen		MH_2				Lasioglossum		Lasioglossum fijiense (Perkins and Cheesman, 1928)			1	-17.8453	178.247				96.4		Viti_Levu	2010-07-28			Fiji							http://dx.doi.org/10.1098/rspb.2020.0045	SAMA
preservedSpecimen		MH_5				Lasioglossum		Lasioglossum fijiense (Perkins and Cheesman, 1928)			1	-17.8453	178.247				96.4		Viti_Levu	2010-07-28			Fiji							http://dx.doi.org/10.1098/rspb.2020.0045	SAMA
preservedSpecimen		MSAPB001_11_AAK004				Lasioglossum		Lasioglossum fijiense (Perkins and Cheesman, 1928)			1	-18.149	178.424				7.9		Viti_Levu	2010-07-29			Fiji							http://dx.doi.org/10.1098/rspb.2020.0045	SAMA
preservedSpecimen		MSAPB003_11_AAA003				Lasioglossum		Lasioglossum fijiense (Perkins and Cheesman, 1928)			1	-18.15	178.443				21		Viti_Levu	2010-07-28			Fiji							http://dx.doi.org/10.1098/rspb.2020.0045	SAMA
preservedSpecimen		MSAPB004_11_AAA004				Lasioglossum		Lasioglossum fijiense (Perkins and Cheesman, 1928)			1	-18.15	178.443				21		Viti_Levu	2010-07-28			Fiji							http://dx.doi.org/10.1098/rspb.2020.0045	SAMA
preservedSpecimen		MSAPB008_11_AAA009				Lasioglossum		Lasioglossum fijiense (Perkins and Cheesman, 1928)			1	-18.15	178.443				21		Viti_Levu	2010-07-28			Fiji							http://dx.doi.org/10.1098/rspb.2020.0045	SAMA
preservedSpecimen		MSAPB010_11_AAA011				Lasioglossum		Lasioglossum fijiense (Perkins and Cheesman, 1928)			1	-18.15	178.443				21		Viti_Levu	2010-07-28			Fiji							http://dx.doi.org/10.1098/rspb.2020.0045	SAMA
preservedSpecimen		MSAPB011_11_AAA012				Lasioglossum		Lasioglossum fijiense (Perkins and Cheesman, 1928)			1	-18.15	178.443				21		Viti_Levu	2010-07-28			Fiji							http://dx.doi.org/10.1098/rspb.2020.0045	SAMA
preservedSpecimen		MSAPB012_11_AAA013				Lasioglossum		Lasioglossum fijiense (Perkins and Cheesman, 1928)			1	-18.15	178.443				21		Viti_Levu	2010-07-28			Fiji							http://dx.doi.org/10.1098/rspb.2020.0045	SAMA
preservedSpecimen		MSAPB013_11_AAB013				Lasioglossum		Lasioglossum fijiense (Perkins and Cheesman, 1928)			1	-18.15	178.442				27		Viti_Levu	2010-07-28			Fiji							http://dx.doi.org/10.1098/rspb.2020.0045	SAMA
preservedSpecimen		MSAPB014_11_AAB014				Lasioglossum		Lasioglossum fijiense (Perkins and Cheesman, 1928)			1	-18.15	178.442				27		Viti_Levu	2010-07-28			Fiji							http://dx.doi.org/10.1098/rspb.2020.0045	SAMA
preservedSpecimen		MSAPB015_11_AAB015				Lasioglossum		Lasioglossum fijiense (Perkins and Cheesman, 1928)			1	-18.15	178.442				27		Viti_Levu	2010-07-28			Fiji							http://dx.doi.org/10.1098/rspb.2020.0045	SAMA
preservedSpecimen		MSAPB016_11_AAB016				Lasioglossum		Lasioglossum fijiense (Perkins and Cheesman, 1928)			1	-18.15	178.442				27		Viti_Levu	2010-07-28			Fiji							http://dx.doi.org/10.1098/rspb.2020.0045	SAMA
preservedSpecimen		MSAPB017_11_AAB017				Lasioglossum		Lasioglossum fijiense (Perkins and Cheesman, 1928)			1	-18.15	178.442				27		Viti_Levu	2010-07-28			Fiji							http://dx.doi.org/10.1098/rspb.2020.0045	SAMA
preservedSpecimen		MSAPB018_11_AAB002				Lasioglossum		Lasioglossum fijiense (Perkins and Cheesman, 1928)			1	-18.15	178.442				27		Viti_Levu	2010-07-28			Fiji							http://dx.doi.org/10.1098/rspb.2020.0045	SAMA
preservedSpecimen		MSAPB019_11_AAB004				Lasioglossum		Lasioglossum fijiense (Perkins and Cheesman, 1928)			1	-18.15	178.442				27		Viti_Levu	2010-07-28			Fiji							http://dx.doi.org/10.1098/rspb.2020.0045	SAMA
preservedSpecimen		MSAPB020_11_AAB005				Lasioglossum		Lasioglossum fijiense (Perkins and Cheesman, 1928)			1	-18.15	178.442				27		Viti_Levu	2010-07-28			Fiji							http://dx.doi.org/10.1098/rspb.2020.0045	SAMA
preservedSpecimen		MSAPB021_11_AAB006				Lasioglossum		Lasioglossum fijiense (Perkins and Cheesman, 1928)			1	-18.15	178.442				27		Viti_Levu	2010-07-28			Fiji							http://dx.doi.org/10.1098/rspb.2020.0045	SAMA
preservedSpecimen		MSAPB022_11_AAB007				Lasioglossum		Lasioglossum fijiense (Perkins and Cheesman, 1928)			1	-18.15	178.442				27		Viti_Levu	2010-07-28			Fiji							http://dx.doi.org/10.1098/rspb.2020.0045	SAMA
preservedSpecimen		MSAPB023_11_AAB008				Lasioglossum		Lasioglossum fijiense (Perkins and Cheesman, 1928)			1	-18.15	178.442				27		Viti_Levu	2010-07-28			Fiji							http://dx.doi.org/10.1098/rspb.2020.0045	SAMA
preservedSpecimen		MSAPB024_11_AAB001				Lasioglossum		Lasioglossum fijiense (Perkins and Cheesman, 1928)			1	-18.15	178.442				27		Viti_Levu	2010-07-28			Fiji							http://dx.doi.org/10.1098/rspb.2020.0045	SAMA
preservedSpecimen		MSAPB025_11_AAC011				Lasioglossum		Lasioglossum fijiense (Perkins and Cheesman, 1928)			1	-18.15	178.442				27		Viti_Levu	2010-07-28			Fiji							http://dx.doi.org/10.1098/rspb.2020.0045	SAMA
preservedSpecimen		MSAPB026_11_AAC013				Lasioglossum		Lasioglossum fijiense (Perkins and Cheesman, 1928)			1	-18.15	178.442				27		Viti_Levu	2010-07-28			Fiji							http://dx.doi.org/10.1098/rspb.2020.0045	SAMA
preservedSpecimen		MSAPB027_11_AAC001				Lasioglossum		Lasioglossum fijiense (Perkins and Cheesman, 1928)			1	-18.15	178.442				27		Viti_Levu	2010-07-28			Fiji							http://dx.doi.org/10.1098/rspb.2020.0045	SAMA
preservedSpecimen		MSAPB028_11_AAC002				Lasioglossum		Lasioglossum fijiense (Perkins and Cheesman, 1928)			1	-18.15	178.442				27		Viti_Levu	2010-07-28			Fiji							http://dx.doi.org/10.1098/rspb.2020.0045	SAMA
preservedSpecimen		MSAPB029_11_AAC003				Lasioglossum		Lasioglossum fijiense (Perkins and Cheesman, 1928)			1	-18.15	178.442				27		Viti_Levu	2010-07-28			Fiji							http://dx.doi.org/10.1098/rspb.2020.0045	SAMA
preservedSpecimen		MSAPB030_11_AAC004				Lasioglossum		Lasioglossum fijiense (Perkins and Cheesman, 1928)			1	-18.15	178.442				27		Viti_Levu	2010-07-28			Fiji							http://dx.doi.org/10.1098/rspb.2020.0045	SAMA
preservedSpecimen		MSAPB031_11_AAD001				Lasioglossum		Lasioglossum fijiense (Perkins and Cheesman, 1928)			1	-18.151	178.441				29.8		Viti_Levu	2010-07-28			Fiji							http://dx.doi.org/10.1098/rspb.2020.0045	SAMA
preservedSpecimen		MSAPB032_11_AAE001				Lasioglossum		Lasioglossum fijiense (Perkins and Cheesman, 1928)			1	-18.151	178.441				29.8		Viti_Levu	2010-07-28			Fiji							http://dx.doi.org/10.1098/rspb.2020.0045	SAMA
preservedSpecimen		MSAPB033_11_AAE002				Lasioglossum		Lasioglossum fijiense (Perkins and Cheesman, 1928)			1	-18.151	178.441				29.8		Viti_Levu	2010-07-28			Fiji							http://dx.doi.org/10.1098/rspb.2020.0045	SAMA
preservedSpecimen		MSAPB034_11_AAE003				Lasioglossum		Lasioglossum fijiense (Perkins and Cheesman, 1928)			1	-18.151	178.441				29.8		Viti_Levu	2010-07-28			Fiji							http://dx.doi.org/10.1098/rspb.2020.0045	SAMA
preservedSpecimen		MSAPB035_11_AAE004				Lasioglossum		Lasioglossum fijiense (Perkins and Cheesman, 1928)			1	-18.151	178.441				29.8		Viti_Levu	2010-07-28			Fiji							http://dx.doi.org/10.1098/rspb.2020.0045	SAMA
preservedSpecimen		MSAPB036_11_AAE005				Lasioglossum		Lasioglossum fijiense (Perkins and Cheesman, 1928)			1	-18.151	178.441				29.8		Viti_Levu	2010-07-28			Fiji							http://dx.doi.org/10.1098/rspb.2020.0045	SAMA
preservedSpecimen		MSAPB037_11_AAF001				Lasioglossum		Lasioglossum fijiense (Perkins and Cheesman, 1928)			1	-18.154	178.443				18.4		Viti_Levu	2010-07-28			Fiji							http://dx.doi.org/10.1098/rspb.2020.0045	SAMA
preservedSpecimen		MSAPB038_11_AAF002				Lasioglossum		Lasioglossum fijiense (Perkins and Cheesman, 1928)			1	-18.154	178.443				18.4		Viti_Levu	2010-07-28			Fiji							http://dx.doi.org/10.1098/rspb.2020.0045	SAMA
preservedSpecimen		MSAPB039_11_AAK005				Lasioglossum		Lasioglossum fijiense (Perkins and Cheesman, 1928)			1	-18.149	178.424				7.9		Viti_Levu	2010-07-29			Fiji							http://dx.doi.org/10.1098/rspb.2020.0045	SAMA
preservedSpecimen		MSAPB041_11_AAI002				Lasioglossum		Lasioglossum fijiense (Perkins and Cheesman, 1928)			1	-18.059	178.458				236.3		Viti_Levu	2010-07-29			Fiji							http://dx.doi.org/10.1098/rspb.2020.0045	SAMA
preservedSpecimen		MSAPB042_11_AAI003				Lasioglossum		Lasioglossum fijiense (Perkins and Cheesman, 1928)			1	-18.059	178.458				236.3		Viti_Levu	2010-07-29			Fiji							http://dx.doi.org/10.1098/rspb.2020.0045	SAMA
preservedSpecimen		MSAPB043_11_AAK006				Lasioglossum		Lasioglossum fijiense (Perkins and Cheesman, 1928)			1	-18.149	178.424				7.9		Viti_Levu	2010-07-29			Fiji							http://dx.doi.org/10.1098/rspb.2020.0045	SAMA
preservedSpecimen		MSAPB044_11_AAK007				Lasioglossum		Lasioglossum fijiense (Perkins and Cheesman, 1928)			1	-18.149	178.424				7.9		Viti_Levu	2010-07-29			Fiji							http://dx.doi.org/10.1098/rspb.2020.0045	SAMA
preservedSpecimen		MSAPB045_11_AAK008				Lasioglossum		Lasioglossum fijiense (Perkins and Cheesman, 1928)			1	-18.149	178.424				7.9		Viti_Levu	2010-07-29			Fiji							http://dx.doi.org/10.1098/rspb.2020.0045	SAMA
preservedSpecimen		MSAPB055_11_AAK019				Lasioglossum		Lasioglossum fijiense (Perkins and Cheesman, 1928)			1	-18.149	178.424				7.9		Viti_Levu	2010-07-29			Fiji							http://dx.doi.org/10.1098/rspb.2020.0045	SAMA
preservedSpecimen		MSAPB056_11_AAK020				Lasioglossum		Lasioglossum fijiense (Perkins and Cheesman, 1928)			1	-18.149	178.424				7.9		Viti_Levu	2010-07-29			Fiji							http://dx.doi.org/10.1098/rspb.2020.0045	SAMA
preservedSpecimen		MSAPB061_11_AAL008				Lasioglossum		Lasioglossum fijiense (Perkins and Cheesman, 1928)			1	-18.15	178.453				5.9		Viti_Levu	2010-07-31			Fiji							http://dx.doi.org/10.1098/rspb.2020.0045	SAMA
preservedSpecimen		MSAPB062_11_AAL017				Lasioglossum		Lasioglossum fijiense (Perkins and Cheesman, 1928)			1	-18.15	178.453				5.9		Viti_Levu	2010-07-31			Fiji							http://dx.doi.org/10.1098/rspb.2020.0045	SAMA
preservedSpecimen		MSAPB063_11_AAL009				Lasioglossum		Lasioglossum fijiense (Perkins and Cheesman, 1928)			1	-18.15	178.453				5.9		Viti_Levu	2010-07-31			Fiji							http://dx.doi.org/10.1098/rspb.2020.0045	SAMA
preservedSpecimen		MSAPB064_11_AAL014				Lasioglossum		Lasioglossum fijiense (Perkins and Cheesman, 1928)			1	-18.15	178.453				5.9		Viti_Levu	2010-07-31			Fiji							http://dx.doi.org/10.1098/rspb.2020.0045	SAMA
preservedSpecimen		MSAPB065_11_AAM001				Lasioglossum		Lasioglossum fijiense (Perkins and Cheesman, 1928)			1	-18.149	178.455				6.3		Viti_Levu	2010-07-31			Fiji							http://dx.doi.org/10.1098/rspb.2020.0045	SAMA
preservedSpecimen		MSAPB066_11_AAM002				Lasioglossum		Lasioglossum fijiense (Perkins and Cheesman, 1928)			1	-18.149	178.455				6.3		Viti_Levu	2010-07-31			Fiji							http://dx.doi.org/10.1098/rspb.2020.0045	SAMA
preservedSpecimen		MSAPB067_11_AAM003				Lasioglossum		Lasioglossum fijiense (Perkins and Cheesman, 1928)			1	-18.149	178.455				6.3		Viti_Levu	2010-07-31			Fiji							http://dx.doi.org/10.1098/rspb.2020.0045	SAMA
preservedSpecimen		MSAPB068_11_AAM004				Lasioglossum		Lasioglossum fijiense (Perkins and Cheesman, 1928)			1	-18.149	178.455				6.3		Viti_Levu	2010-07-31			Fiji							http://dx.doi.org/10.1098/rspb.2020.0045	SAMA
preservedSpecimen		MSAPB069_11_AAM005				Lasioglossum		Lasioglossum fijiense (Perkins and Cheesman, 1928)			1	-18.149	178.455				6.3		Viti_Levu	2010-07-31			Fiji							http://dx.doi.org/10.1098/rspb.2020.0045	SAMA
preservedSpecimen		MSAPB070_11_AAN001				Lasioglossum		Lasioglossum fijiense (Perkins and Cheesman, 1928)			1	-18.225	178.181				4.9		Viti_Levu	2010-07-31			Fiji							http://dx.doi.org/10.1098/rspb.2020.0045	SAMA
preservedSpecimen		MSAPB071_11_AAO001				Lasioglossum		Lasioglossum fijiense (Perkins and Cheesman, 1928)			1	-18.247	178.08				7.7		Viti_Levu	2010-07-31			Fiji							http://dx.doi.org/10.1098/rspb.2020.0045	SAMA
preservedSpecimen		MSAPB072_11_AAO008				Lasioglossum		Lasioglossum fijiense (Perkins and Cheesman, 1928)			1	-18.247	178.08				7.7		Viti_Levu	2010-07-31			Fiji							http://dx.doi.org/10.1098/rspb.2020.0045	SAMA
preservedSpecimen		MSAPB073_11_AAO009				Lasioglossum		Lasioglossum fijiense (Perkins and Cheesman, 1928)			1	-18.247	178.08				7.7		Viti_Levu	2010-07-31			Fiji							http://dx.doi.org/10.1098/rspb.2020.0045	SAMA
preservedSpecimen		MSAPB074_11_AAO010				Lasioglossum		Lasioglossum fijiense (Perkins and Cheesman, 1928)			1	-18.247	178.08				7.7		Viti_Levu	2010-07-31			Fiji							http://dx.doi.org/10.1098/rspb.2020.0045	SAMA
preservedSpecimen		MSAPB075_11_AAO011				Lasioglossum		Lasioglossum fijiense (Perkins and Cheesman, 1928)			1	-18.247	178.08				7.7		Viti_Levu	2010-07-31			Fiji							http://dx.doi.org/10.1098/rspb.2020.0045	SAMA
preservedSpecimen		MSAPB076_11_AAO012				Lasioglossum		Lasioglossum fijiense (Perkins and Cheesman, 1928)			1	-18.247	178.08				7.7		Viti_Levu	2010-07-31			Fiji							http://dx.doi.org/10.1098/rspb.2020.0045	SAMA
preservedSpecimen		MSAPB077_11_AAO013				Lasioglossum		Lasioglossum fijiense (Perkins and Cheesman, 1928)			1	-18.247	178.08				7.7		Viti_Levu	2010-07-31			Fiji							http://dx.doi.org/10.1098/rspb.2020.0045	SAMA
preservedSpecimen		MSAPB078_11_AAO014				Lasioglossum		Lasioglossum fijiense (Perkins and Cheesman, 1928)			1	-18.247	178.08				7.7		Viti_Levu	2010-07-31			Fiji							http://dx.doi.org/10.1098/rspb.2020.0045	SAMA
preservedSpecimen		MSAPB079_11_AAO015				Lasioglossum		Lasioglossum fijiense (Perkins and Cheesman, 1928)			1	-18.247	178.08				7.7		Viti_Levu	2010-07-31			Fiji							http://dx.doi.org/10.1098/rspb.2020.0045	SAMA
preservedSpecimen		MSAPB080_11_AAO016				Lasioglossum		Lasioglossum fijiense (Perkins and Cheesman, 1928)			1	-18.247	178.08				7.7		Viti_Levu	2010-07-31			Fiji							http://dx.doi.org/10.1098/rspb.2020.0045	SAMA
preservedSpecimen		MSAPB081_11_AAO017				Lasioglossum		Lasioglossum fijiense (Perkins and Cheesman, 1928)			1	-18.247	178.08				7.7		Viti_Levu	2010-07-31			Fiji							http://dx.doi.org/10.1098/rspb.2020.0045	SAMA
preservedSpecimen		MSAPB082_11_AAO018				Lasioglossum		Lasioglossum fijiense (Perkins and Cheesman, 1928)			1	-18.247	178.08				7.7		Viti_Levu	2010-07-31			Fiji							http://dx.doi.org/10.1098/rspb.2020.0045	SAMA
preservedSpecimen		MSAPB083_11_AAO019				Lasioglossum		Lasioglossum fijiense (Perkins and Cheesman, 1928)			1	-18.247	178.08				7.7		Viti_Levu	2010-07-31			Fiji							http://dx.doi.org/10.1098/rspb.2020.0045	SAMA
preservedSpecimen		MSAPB084_11_AAO020				Lasioglossum		Lasioglossum fijiense (Perkins and Cheesman, 1928)			1	-18.247	178.08				7.7		Viti_Levu	2010-07-31			Fiji							http://dx.doi.org/10.1098/rspb.2020.0045	SAMA
preservedSpecimen		MSAPB085_11_AAO021				Lasioglossum		Lasioglossum fijiense (Perkins and Cheesman, 1928)			1	-18.247	178.08				7.7		Viti_Levu	2010-07-31			Fiji							http://dx.doi.org/10.1098/rspb.2020.0045	SAMA
preservedSpecimen		MSAPB086_11_AAO022				Lasioglossum		Lasioglossum fijiense (Perkins and Cheesman, 1928)			1	-18.247	178.08				7.7		Viti_Levu	2010-07-31			Fiji							http://dx.doi.org/10.1098/rspb.2020.0045	SAMA
preservedSpecimen		MSAPB087_11_AAO023				Lasioglossum		Lasioglossum fijiense (Perkins and Cheesman, 1928)			1	-18.247	178.08				7.7		Viti_Levu	2010-07-31			Fiji							http://dx.doi.org/10.1098/rspb.2020.0045	SAMA
preservedSpecimen		MSAPB088_11_AAO039				Lasioglossum		Lasioglossum fijiense (Perkins and Cheesman, 1928)			1	-18.247	178.08				7.7		Viti_Levu	2010-07-31			Fiji							http://dx.doi.org/10.1098/rspb.2020.0045	SAMA
preservedSpecimen		MSAPB089_11_AAO040				Lasioglossum		Lasioglossum fijiense (Perkins and Cheesman, 1928)			1	-18.247	178.08				7.7		Viti_Levu	2010-07-31			Fiji							http://dx.doi.org/10.1098/rspb.2020.0045	SAMA
preservedSpecimen		MSAPB090_11_AAO041				Lasioglossum		Lasioglossum fijiense (Perkins and Cheesman, 1928)			1	-18.247	178.08				7.7		Viti_Levu	2010-07-31			Fiji							http://dx.doi.org/10.1098/rspb.2020.0045	SAMA
preservedSpecimen		MSAPB091_11_AAO042				Lasioglossum		Lasioglossum fijiense (Perkins and Cheesman, 1928)			1	-18.247	178.08				7.7		Viti_Levu	2010-07-31			Fiji							http://dx.doi.org/10.1098/rspb.2020.0045	SAMA
preservedSpecimen		MSAPB092_11_AAO043				Lasioglossum		Lasioglossum fijiense (Perkins and Cheesman, 1928)			1	-18.247	178.08				7.7		Viti_Levu	2010-07-31			Fiji							http://dx.doi.org/10.1098/rspb.2020.0045	SAMA
preservedSpecimen		MSAPB093_11_AAO044				Lasioglossum		Lasioglossum fijiense (Perkins and Cheesman, 1928)			1	-18.247	178.08				7.7		Viti_Levu	2010-07-31			Fiji							http://dx.doi.org/10.1098/rspb.2020.0045	SAMA
preservedSpecimen		MSAPB094_11_AAO002				Lasioglossum		Lasioglossum fijiense (Perkins and Cheesman, 1928)			1	-18.247	178.08				7.7		Viti_Levu	2010-07-31			Fiji							http://dx.doi.org/10.1098/rspb.2020.0045	SAMA
preservedSpecimen		MSAPB095_11_AAO003				Lasioglossum		Lasioglossum fijiense (Perkins and Cheesman, 1928)			1	-18.247	178.08				7.7		Viti_Levu	2010-07-31			Fiji							http://dx.doi.org/10.1098/rspb.2020.0045	SAMA
preservedSpecimen		MSAPB1000_12_ADC024				Lasioglossum		Lasioglossum fijiense (Perkins and Cheesman, 1928)			1	-20.663	-178.74				37.1		Ono-i-Lau	2011-07-07			Fiji							http://dx.doi.org/10.1098/rspb.2020.0045	SAMA
preservedSpecimen		MSAPB1002_12_ADE002				Lasioglossum		Lasioglossum fijiense (Perkins and Cheesman, 1928)			1	-20.6635	-178.725				15.9		Ono-i-Lau	2011-07-07			Fiji							http://dx.doi.org/10.1098/rspb.2020.0045	SAMA
preservedSpecimen		MSAPB1004_12_ADG001				Lasioglossum		Lasioglossum fijiense (Perkins and Cheesman, 1928)			1	-20.607	-178.682				3.3		Ono-i-Lau	2011-07-08			Fiji							http://dx.doi.org/10.1098/rspb.2020.0045	SAMA
preservedSpecimen		MSAPB1005				Lasioglossum		Lasioglossum fijiense (Perkins and Cheesman, 1928)			1	-20.607	-178.682				3.3		Ono-i-Lau	2011-07-08			Fiji							http://dx.doi.org/10.1098/rspb.2020.0045	SAMA
preservedSpecimen		MSAPB1006_12_ADG003				Lasioglossum		Lasioglossum fijiense (Perkins and Cheesman, 1928)			1	-20.607	-178.682				3.3		Ono-i-Lau	2011-07-08			Fiji							http://dx.doi.org/10.1098/rspb.2020.0045	SAMA
preservedSpecimen		MSAPB1007_12_ADG004				Lasioglossum		Lasioglossum fijiense (Perkins and Cheesman, 1928)			1	-20.607	-178.682				3.3		Ono-i-Lau	2011-07-08			Fiji							http://dx.doi.org/10.1098/rspb.2020.0045	SAMA
preservedSpecimen		MSAPB1008_12_ADG005				Lasioglossum		Lasioglossum fijiense (Perkins and Cheesman, 1928)			1	-20.607	-178.682				3.3		Ono-i-Lau	2011-07-08			Fiji							http://dx.doi.org/10.1098/rspb.2020.0045	SAMA
preservedSpecimen		MSAPB1009_12_ADH003				Lasioglossum		Lasioglossum fijiense (Perkins and Cheesman, 1928)			1	-20.6731	-178.696				4.8		Ono-i-Lau	2011-07-08			Fiji							http://dx.doi.org/10.1098/rspb.2020.0045	SAMA
preservedSpecimen		MSAPB1012_12_ADS001				Lasioglossum		Lasioglossum fijiense (Perkins and Cheesman, 1928)			1	-18.8493	-178.669				12.6		Namuka-i-Lau	2011-07-15			Fiji							http://dx.doi.org/10.1098/rspb.2020.0045	SAMA
preservedSpecimen		MSAPB1013_12_ADS002				Lasioglossum		Lasioglossum fijiense (Perkins and Cheesman, 1928)			1	-18.8493	-178.669				12.6		Namuka-i-Lau	2011-07-15			Fiji							http://dx.doi.org/10.1098/rspb.2020.0045	SAMA
preservedSpecimen		MSAPB1014				Lasioglossum		Lasioglossum fijiense (Perkins and Cheesman, 1928)			1	-18.8493	-178.669				12.6		Namuka-i-Lau	2011-07-15			Fiji							http://dx.doi.org/10.1098/rspb.2020.0045	SAMA
preservedSpecimen		MSAPB1015				Lasioglossum		Lasioglossum fijiense (Perkins and Cheesman, 1928)			1	-18.8493	-178.669				12.6		Namuka-i-Lau	2011-07-15			Fiji							http://dx.doi.org/10.1098/rspb.2020.0045	SAMA
preservedSpecimen		MSAPB1016_12_ADS005				Lasioglossum		Lasioglossum fijiense (Perkins and Cheesman, 1928)			1	-18.8493	-178.669				12.6		Namuka-i-Lau	2011-07-15			Fiji							http://dx.doi.org/10.1098/rspb.2020.0045	SAMA
preservedSpecimen		MSAPB1017_12_ADZ001				Lasioglossum		Lasioglossum fijiense (Perkins and Cheesman, 1928)			1	-19.1509	-178.58				12.9		Vuloga	2011-07-19			Fiji							http://dx.doi.org/10.1098/rspb.2020.0045	SAMA
preservedSpecimen		MSAPB1018_12_ADZ002				Lasioglossum		Lasioglossum fijiense (Perkins and Cheesman, 1928)			1	-19.1509	-178.58				12.9		Vuloga	2011-07-19			Fiji							http://dx.doi.org/10.1098/rspb.2020.0045	SAMA
preservedSpecimen		MSAPB1019_12_ADZ003				Lasioglossum		Lasioglossum fijiense (Perkins and Cheesman, 1928)			1	-19.1509	-178.58				12.9		Vuloga	2011-07-19			Fiji							http://dx.doi.org/10.1098/rspb.2020.0045	SAMA
preservedSpecimen		MSAPB1020_12_ADZ004				Lasioglossum		Lasioglossum fijiense (Perkins and Cheesman, 1928)			1	-19.1509	-178.58				12.9		Vuloga	2011-07-19			Fiji							http://dx.doi.org/10.1098/rspb.2020.0045	SAMA
preservedSpecimen		MSAPB1021_12_ADZ005				Lasioglossum		Lasioglossum fijiense (Perkins and Cheesman, 1928)			1	-19.1509	-178.58				12.9		Vuloga	2011-07-19			Fiji							http://dx.doi.org/10.1098/rspb.2020.0045	SAMA
preservedSpecimen		MSAPB1022_12_AEE001				Lasioglossum		Lasioglossum fijiense (Perkins and Cheesman, 1928)			1	-18.9353	-178.957				35.1		Kabara	2011-07-21			Fiji							http://dx.doi.org/10.1098/rspb.2020.0045	SAMA
preservedSpecimen		MSAPB1023				Lasioglossum		Lasioglossum fijiense (Perkins and Cheesman, 1928)			1	-18.9353	-178.957				35.1		Kabara	2011-07-21			Fiji							http://dx.doi.org/10.1098/rspb.2020.0045	SAMA
preservedSpecimen		MSAPB1024_12_AEE003				Lasioglossum		Lasioglossum fijiense (Perkins and Cheesman, 1928)			1	-18.9353	-178.957				35.1		Kabara	2011-07-21			Fiji							http://dx.doi.org/10.1098/rspb.2020.0045	SAMA
preservedSpecimen		MSAPB1025				Lasioglossum		Lasioglossum fijiense (Perkins and Cheesman, 1928)			1	-18.9353	-178.957				35.1		Kabara	2011-07-21			Fiji							http://dx.doi.org/10.1098/rspb.2020.0045	SAMA
preservedSpecimen		MSAPB1026				Lasioglossum		Lasioglossum fijiense (Perkins and Cheesman, 1928)			1	-18.9353	-178.957				35.1		Kabara	2011-07-21			Fiji							http://dx.doi.org/10.1098/rspb.2020.0045	SAMA
preservedSpecimen		MSAPB1027				Lasioglossum		Lasioglossum fijiense (Perkins and Cheesman, 1928)			1	-18.9681	-179.883				9		Totoya	2011-07-25			Fiji							http://dx.doi.org/10.1098/rspb.2020.0045	SAMA
preservedSpecimen		MSAPB1028				Lasioglossum		Lasioglossum fijiense (Perkins and Cheesman, 1928)			1	-18.9681	-179.883				9		Totoya	2011-07-25			Fiji							http://dx.doi.org/10.1098/rspb.2020.0045	SAMA
preservedSpecimen		MSAPB1030				Lasioglossum		Lasioglossum fijiense (Perkins and Cheesman, 1928)			1	-18.9681	-179.883				9		Totoya	2011-07-25			Fiji							http://dx.doi.org/10.1098/rspb.2020.0045	SAMA
preservedSpecimen		MSAPB1031				Lasioglossum		Lasioglossum fijiense (Perkins and Cheesman, 1928)			1	-18.9681	-179.883				9		Totoya	2011-07-25			Fiji							http://dx.doi.org/10.1098/rspb.2020.0045	SAMA
preservedSpecimen		MSAPB1033_12_AEN002				Lasioglossum		Lasioglossum fijiense (Perkins and Cheesman, 1928)			1	-19.1504	179.75				15.8		Matuku	2011-07-27			Fiji							http://dx.doi.org/10.1098/rspb.2020.0045	SAMA
preservedSpecimen		MSAPB1034				Lasioglossum		Lasioglossum fijiense (Perkins and Cheesman, 1928)			1	-19.1504	179.75				15.8		Matuku	2011-07-27			Fiji							http://dx.doi.org/10.1098/rspb.2020.0045	SAMA
preservedSpecimen		MSAPB1036_12_AER002				Lasioglossum		Lasioglossum fijiense (Perkins and Cheesman, 1928)			1	-19.1411	179.751				162.5		Matuku	2011-07-28			Fiji							http://dx.doi.org/10.1098/rspb.2020.0045	SAMA
preservedSpecimen		MSAPB1037_12_AET002				Lasioglossum		Lasioglossum fijiense (Perkins and Cheesman, 1928)			1	-18.3629	-179.278				17.3		Vanua_Vatu	2011-07-30			Fiji							http://dx.doi.org/10.1098/rspb.2020.0045	SAMA
preservedSpecimen		MSAPB1039_12_AEU001				Lasioglossum		Lasioglossum fijiense (Perkins and Cheesman, 1928)			1	-18.3647	-179.276				47.4		Vanua_Vatu	2011-07-30			Fiji							http://dx.doi.org/10.1098/rspb.2020.0045	SAMA
preservedSpecimen		MSAPB1040_12_AEW001				Lasioglossum		Lasioglossum fijiense (Perkins and Cheesman, 1928)			1	-18.3751	-179.27				73.5		Vanua_Vatu	2011-07-30			Fiji							http://dx.doi.org/10.1098/rspb.2020.0045	SAMA
preservedSpecimen		MSAPB1041_12_AEW006				Lasioglossum		Lasioglossum fijiense (Perkins and Cheesman, 1928)			1	-18.3751	-179.27				73.5		Vanua_Vatu	2011-07-30			Fiji							http://dx.doi.org/10.1098/rspb.2020.0045	SAMA
preservedSpecimen		MSAPB1042				Lasioglossum		Lasioglossum fijiense (Perkins and Cheesman, 1928)			1	-18.5583	179.929				16.3		Moala	2011-07-31			Fiji							http://dx.doi.org/10.1098/rspb.2020.0045	SAMA
preservedSpecimen		MSAPB1043_12_AEX002				Lasioglossum		Lasioglossum fijiense (Perkins and Cheesman, 1928)			1	-18.5583	179.929				16.3		Moala	2011-07-31			Fiji							http://dx.doi.org/10.1098/rspb.2020.0045	SAMA
preservedSpecimen		MSAPB1044				Lasioglossum		Lasioglossum fijiense (Perkins and Cheesman, 1928)			1	-18.5583	179.929				16.3		Moala	2011-07-31			Fiji							http://dx.doi.org/10.1098/rspb.2020.0045	SAMA
preservedSpecimen		MSAPB1045				Lasioglossum		Lasioglossum fijiense (Perkins and Cheesman, 1928)			1	-18.5617	179.928				85.9		Moala	2011-07-31			Fiji							http://dx.doi.org/10.1098/rspb.2020.0045	SAMA
preservedSpecimen		MSAPB1165				Lasioglossum		Lasioglossum fijiense (Perkins and Cheesman, 1928)			1	-18.5617	179.928				85.9		Moala	2011-07-31			Fiji							http://dx.doi.org/10.1098/rspb.2020.0045	SAMA
preservedSpecimen		MSAPB1166_12_AFG001				Lasioglossum		Lasioglossum concavum (Dorey, Schwarz and Stevens, 2019)			1	-16.8287	-179.981				702.6		Taveuni	2011-08-30			Fiji							http://dx.doi.org/10.1098/rspb.2020.0045	SAMA
preservedSpecimen		MSAPB1168_12_AFG003				Lasioglossum		Lasioglossum Species O			1	-16.8287	-179.981				702.6		Taveuni	2011-08-30			Fiji							http://dx.doi.org/10.1098/rspb.2020.0045	SAMA
preservedSpecimen		MSAPB1169_12_AFG004				Lasioglossum		Lasioglossum Species O			1	-16.8287	-179.981				702.6		Taveuni	2011-08-30			Fiji							http://dx.doi.org/10.1098/rspb.2020.0045	SAMA
preservedSpecimen		MSAPB1170				Lasioglossum		Lasioglossum concavum (Dorey, Schwarz and Stevens, 2019)			1	-16.8287	-179.981				702.6		Taveuni	2011-08-30			Fiji							http://dx.doi.org/10.1098/rspb.2020.0045	SAMA
preservedSpecimen		MSAPB1171_12_AFG006				Lasioglossum		Lasioglossum concavum (Dorey, Schwarz and Stevens, 2019)			1	-16.8287	-179.981				702.6		Taveuni	2011-08-30			Fiji							http://dx.doi.org/10.1098/rspb.2020.0045	SAMA
preservedSpecimen		MSAPB1173				Lasioglossum		Lasioglossum fijiense (Perkins and Cheesman, 1928)			1	-16.8261	-179.989				536.7		Taveuni	2011-08-30			Fiji							http://dx.doi.org/10.1098/rspb.2020.0045	SAMA
preservedSpecimen		MSAPB1174_12_AFH003				Lasioglossum		Lasioglossum fijiense (Perkins and Cheesman, 1928)			1	-16.8261	-179.989				536.7		Taveuni	2011-08-30			Fiji							http://dx.doi.org/10.1098/rspb.2020.0045	SAMA
preservedSpecimen		MSAPB1175_12_AFM002				Lasioglossum		Lasioglossum fijiense (Perkins and Cheesman, 1928)			1	-16.7728	179.33				6.1		Vanua_Levu	2011-09-03			Fiji							http://dx.doi.org/10.1098/rspb.2020.0045	SAMA
preservedSpecimen		MSAPB1176_12_AFM004				Lasioglossum		Lasioglossum fijiense (Perkins and Cheesman, 1928)			1	-16.7728	179.33				6.1		Vanua_Levu	2011-09-03			Fiji							http://dx.doi.org/10.1098/rspb.2020.0045	SAMA
preservedSpecimen		MSAPB1177_12_AFO025				Lasioglossum		Lasioglossum atritergus (Dorey, Schwarz and Stevens, 2019)			1	-17.5762	177.935				1040.7		Viti_Levu	2011-12-14			Fiji							http://dx.doi.org/10.1098/rspb.2020.0045	SAMA
preservedSpecimen		MSAPB1178_12_AFO028				Lasioglossum		Lasioglossum atritergus (Dorey, Schwarz and Stevens, 2019)			1	-17.5762	177.935				1040.7		Viti_Levu	2011-12-14			Fiji							http://dx.doi.org/10.1098/rspb.2020.0045	SAMA
preservedSpecimen		MSAPB1180				Lasioglossum		Lasioglossum atritergus (Dorey, Schwarz and Stevens, 2019)			1	-17.5762	177.935				1040.7		Viti_Levu	2011-12-14			Fiji							http://dx.doi.org/10.1098/rspb.2020.0045	SAMA
preservedSpecimen		MSAPB1181_12_AFO031				Lasioglossum		Lasioglossum atritergus (Dorey, Schwarz and Stevens, 2019)			1	-17.5762	177.935				1040.7		Viti_Levu	2011-12-14			Fiji							http://dx.doi.org/10.1098/rspb.2020.0045	SAMA
preservedSpecimen		MSAPB1183_12_AFO041				Lasioglossum		Lasioglossum nadarivatu (Dorey, Schwarz and Stevens, 2019)			1	-17.5762	177.935				1040.7		Viti_Levu	2011-12-14			Fiji							http://dx.doi.org/10.1098/rspb.2020.0045	SAMA
preservedSpecimen		MSAPB1185_12_AFO053				Lasioglossum		Lasioglossum atritergus (Dorey, Schwarz and Stevens, 2019)			1	-17.5762	177.935				1040.7		Viti_Levu	2011-12-14			Fiji							http://dx.doi.org/10.1098/rspb.2020.0045	SAMA
preservedSpecimen		MSAPB1187_12_AFO055				Lasioglossum		Lasioglossum achrostus (Michener, 1979)			1	-17.5762	177.935				1040.7		Viti_Levu	2011-12-14			Fiji							http://dx.doi.org/10.1098/rspb.2020.0045	SAMA
preservedSpecimen		MSAPB1188_12_AFO056				Lasioglossum		Lasioglossum achrostus (Michener, 1979)			1	-17.5762	177.935				1040.7		Viti_Levu	2011-12-14			Fiji							http://dx.doi.org/10.1098/rspb.2020.0045	SAMA
preservedSpecimen		MSAPB1189				Lasioglossum		Lasioglossum atritergus (Dorey, Schwarz and Stevens, 2019)			1	-17.5762	177.935				1040.7		Viti_Levu	2011-12-14			Fiji							http://dx.doi.org/10.1098/rspb.2020.0045	SAMA
preservedSpecimen		MSAPB1190_12_AFO071				Lasioglossum		Lasioglossum atritergus (Dorey, Schwarz and Stevens, 2019)			1	-17.5762	177.935				1040.7		Viti_Levu	2011-12-14			Fiji							http://dx.doi.org/10.1098/rspb.2020.0045	SAMA
preservedSpecimen		MSAPB1194				Lasioglossum		Lasioglossum atritergus (Dorey, Schwarz and Stevens, 2019)			1	-17.5772	177.943				884.4		Viti_Levu	2011-12-14			Fiji							http://dx.doi.org/10.1098/rspb.2020.0045	SAMA
preservedSpecimen		MSAPB1195				Lasioglossum		Lasioglossum atritergus (Dorey, Schwarz and Stevens, 2019)			1	-17.5707	177.944				850.1		Viti_Levu	2011-12-14			Fiji							http://dx.doi.org/10.1098/rspb.2020.0045	SAMA
preservedSpecimen		MSAPB1196				Lasioglossum		Lasioglossum atritergus (Dorey, Schwarz and Stevens, 2019)			1	-17.5707	177.944				850.1		Viti_Levu	2011-12-14			Fiji							http://dx.doi.org/10.1098/rspb.2020.0045	SAMA
preservedSpecimen		MSAPB1297_12_AFO023				Lasioglossum		Lasioglossum fijiense (Perkins and Cheesman, 1928)			1	-17.5762	177.935				1040.7		Viti_Levu	2011-12-14			Fiji							http://dx.doi.org/10.1098/rspb.2020.0045	SAMA
preservedSpecimen		MSAPB1298_12_AFO065				Lasioglossum		Lasioglossum nadarivatu (Dorey, Schwarz and Stevens, 2019)			1	-17.5762	177.935				1040.7		Viti_Levu	2011-12-14			Fiji							http://dx.doi.org/10.1098/rspb.2020.0045	SAMA
preservedSpecimen		MSAPB1299_12_AFO072				Lasioglossum		Lasioglossum fijiense (Perkins and Cheesman, 1928)			1	-17.5762	177.935				1040.7		Viti_Levu	2011-12-14			Fiji							http://dx.doi.org/10.1098/rspb.2020.0045	SAMA
preservedSpecimen		MSAPB1300_12_AFO002				Lasioglossum		Lasioglossum nadarivatu (Dorey, Schwarz and Stevens, 2019)			1	-17.5762	177.935				1040.7		Viti_Levu	2011-12-14			Fiji							http://dx.doi.org/10.1098/rspb.2020.0045	SAMA
preservedSpecimen		MSAPB1301_12_AFO004				Lasioglossum		Lasioglossum nadarivatu (Dorey, Schwarz and Stevens, 2019)			1	-17.5762	177.935				1040.7		Viti_Levu	2011-12-14			Fiji							http://dx.doi.org/10.1098/rspb.2020.0045	SAMA
preservedSpecimen		MSAPB1302_12_AFO040				Lasioglossum		Lasioglossum nadarivatu (Dorey, Schwarz and Stevens, 2019)			1	-17.5762	177.935				1040.7		Viti_Levu	2011-12-14			Fiji							http://dx.doi.org/10.1098/rspb.2020.0045	SAMA
preservedSpecimen		MSAPB1303_12_AFO046				Lasioglossum		Lasioglossum Species K			1	-17.5762	177.935				1040.7		Viti_Levu	2011-12-14			Fiji							http://dx.doi.org/10.1098/rspb.2020.0045	SAMA
preservedSpecimen		MSAPB1304_12_AFO049				Lasioglossum		Lasioglossum nadarivatu (Dorey, Schwarz and Stevens, 2019)			1	-17.5762	177.935				1040.7		Viti_Levu	2011-12-14			Fiji							http://dx.doi.org/10.1098/rspb.2020.0045	SAMA
preservedSpecimen		MSAPB144_11_ACL006				Lasioglossum		Lasioglossum fijiense (Perkins and Cheesman, 1928)			1	-16.43	179.373				7		Vanua_Levu	2010-08-15			Fiji							http://dx.doi.org/10.1098/rspb.2020.0045	SAMA
preservedSpecimen		MSAPB146_11_ACN003				Lasioglossum		Lasioglossum fijiense (Perkins and Cheesman, 1928)			1	-16.434	179.363				5.2		Vanua_Levu	2010-08-15			Fiji							http://dx.doi.org/10.1098/rspb.2020.0045	SAMA
preservedSpecimen		MSAPB147_11_ACN004				Lasioglossum		Lasioglossum fijiense (Perkins and Cheesman, 1928)			1	-16.434	179.363				5.2		Vanua_Levu	2010-08-15			Fiji							http://dx.doi.org/10.1098/rspb.2020.0045	SAMA
preservedSpecimen		MSAPB149_11_AAN006				Lasioglossum		Lasioglossum fijiense (Perkins and Cheesman, 1928)			1	-16.434	179.363				5.2		Vanua_Levu	2010-08-15			Fiji							http://dx.doi.org/10.1098/rspb.2020.0045	SAMA
preservedSpecimen		MSAPB150_11_ACN007				Lasioglossum		Lasioglossum fijiense (Perkins and Cheesman, 1928)			1	-16.434	179.363				5.2		Vanua_Levu	2010-08-15			Fiji							http://dx.doi.org/10.1098/rspb.2020.0045	SAMA
preservedSpecimen		MSAPB151_11_ACN008				Lasioglossum		Lasioglossum fijiense (Perkins and Cheesman, 1928)			1	-16.434	179.363				5.2		Vanua_Levu	2010-08-15			Fiji							http://dx.doi.org/10.1098/rspb.2020.0045	SAMA
preservedSpecimen		MSAPB162_11_ACQ001				Lasioglossum		Lasioglossum Species O			1	-16.967	179.997				15.6		Taveuni	2010-09-01			Fiji							http://dx.doi.org/10.1098/rspb.2020.0045	SAMA
preservedSpecimen		MSAPB163_11_ACQ002				Lasioglossum		Lasioglossum taveuni (Dorey, Schwarz and Stevens, 2019)			1	-16.967	179.997				15		Taveuni	2010-09-01			Fiji							http://dx.doi.org/10.1098/rspb.2020.0045	SAMA
preservedSpecimen		MSAPB164_11_ACQ003				Lasioglossum		Lasioglossum taveuni (Dorey, Schwarz and Stevens, 2019)			1	-16.967	179.997				15.6		Taveuni	2010-09-01			Fiji							http://dx.doi.org/10.1098/rspb.2020.0045	SAMA
preservedSpecimen		MSAPB165_11_ACQ004				Lasioglossum		Lasioglossum taveuni (Dorey, Schwarz and Stevens, 2019)			1	-16.967	179.997				15.6		Taveuni	2010-09-01			Fiji							http://dx.doi.org/10.1098/rspb.2020.0045	SAMA
preservedSpecimen		MSAPB180_11_AAA005				Lasioglossum		Lasioglossum fijiense (Perkins and Cheesman, 1928)			1	-18.15	178.443				21		Viti_Levu	2010-07-28			Fiji							http://dx.doi.org/10.1098/rspb.2020.0045	SAMA
preservedSpecimen		MSAPB181_11_AAC012				Lasioglossum		Lasioglossum fijiense (Perkins and Cheesman, 1928)			1	-18.15	178.442				27		Viti_Levu	2010-07-28			Fiji							http://dx.doi.org/10.1098/rspb.2020.0045	SAMA
preservedSpecimen		MSAPB188_11_ACT001				Lasioglossum		Lasioglossum groomi (Dorey, Schwarz and Stevens, 2019)			1	-17.987	178.157				255.4		Viti_Levu	2009-03-16			Fiji							http://dx.doi.org/10.1098/rspb.2020.0045	SAMA
preservedSpecimen		MSAPB189_11_ACU001				Lasioglossum		Lasioglossum Species I			1	-18.188	178.106				31.5		Viti_Levu	2009-03-16			Fiji							http://dx.doi.org/10.1098/rspb.2020.0045	SAMA
preservedSpecimen		MSAPB191_11_AAO004				Lasioglossum		Lasioglossum fijiense (Perkins and Cheesman, 1928)			1	-18.247	178.08				7.7		Viti_Levu	2010-07-31			Fiji							http://dx.doi.org/10.1098/rspb.2020.0045	SAMA
preservedSpecimen		MSAPB192_11_AAO005				Lasioglossum		Lasioglossum fijiense (Perkins and Cheesman, 1928)			1	-18.247	178.08				7.7		Viti_Levu	2010-07-31			Fiji							http://dx.doi.org/10.1098/rspb.2020.0045	SAMA
preservedSpecimen		MSAPB193_11_AAO006				Lasioglossum		Lasioglossum fijiense (Perkins and Cheesman, 1928)			1	-18.247	178.08				7.7		Viti_Levu	2010-07-31			Fiji							http://dx.doi.org/10.1098/rspb.2020.0045	SAMA
preservedSpecimen		MSAPB194_11_AAO007				Lasioglossum		Lasioglossum fijiense (Perkins and Cheesman, 1928)			1	-18.247	178.08				7.7		Viti_Levu	2010-07-31			Fiji							http://dx.doi.org/10.1098/rspb.2020.0045	SAMA
preservedSpecimen		MSAPB195_11_AAO024				Lasioglossum		Lasioglossum fijiense (Perkins and Cheesman, 1928)			1	-18.247	178.08				7.7		Viti_Levu	2010-07-31			Fiji							http://dx.doi.org/10.1098/rspb.2020.0045	SAMA
preservedSpecimen		MSAPB196_11_AAO025				Lasioglossum		Lasioglossum fijiense (Perkins and Cheesman, 1928)			1	-18.247	178.08				7.7		Viti_Levu	2010-07-31			Fiji							http://dx.doi.org/10.1098/rspb.2020.0045	SAMA
preservedSpecimen		MSAPB197_11_AAO026				Lasioglossum		Lasioglossum fijiense (Perkins and Cheesman, 1928)			1	-18.247	178.08				7.7		Viti_Levu	2010-07-31			Fiji							http://dx.doi.org/10.1098/rspb.2020.0045	SAMA
preservedSpecimen		MSAPB198_11_AAO027				Lasioglossum		Lasioglossum fijiense (Perkins and Cheesman, 1928)			1	-18.247	178.08				7.7		Viti_Levu	2010-07-31			Fiji							http://dx.doi.org/10.1098/rspb.2020.0045	SAMA
preservedSpecimen		MSAPB199_11_AAO028				Lasioglossum		Lasioglossum fijiense (Perkins and Cheesman, 1928)			1	-18.247	178.08				7.7		Viti_Levu	2010-07-31			Fiji							http://dx.doi.org/10.1098/rspb.2020.0045	SAMA
preservedSpecimen		MSAPB200_11_AAO029				Lasioglossum		Lasioglossum fijiense (Perkins and Cheesman, 1928)			1	-18.247	178.08				7.7		Viti_Levu	2010-07-31			Fiji							http://dx.doi.org/10.1098/rspb.2020.0045	SAMA
preservedSpecimen		MSAPB201_11_AAO030				Lasioglossum		Lasioglossum fijiense (Perkins and Cheesman, 1928)			1	-18.247	178.08				7.7		Viti_Levu	2010-07-31			Fiji							http://dx.doi.org/10.1098/rspb.2020.0045	SAMA
preservedSpecimen		MSAPB202_11_AAO031				Lasioglossum		Lasioglossum fijiense (Perkins and Cheesman, 1928)			1	-18.247	178.08				7.7		Viti_Levu	2010-07-31			Fiji							http://dx.doi.org/10.1098/rspb.2020.0045	SAMA
preservedSpecimen		MSAPB203_11_AAO032				Lasioglossum		Lasioglossum fijiense (Perkins and Cheesman, 1928)			1	-18.247	178.08				7.7		Viti_Levu	2010-07-31			Fiji							http://dx.doi.org/10.1098/rspb.2020.0045	SAMA
preservedSpecimen		MSAPB204_11_AAO033				Lasioglossum		Lasioglossum fijiense (Perkins and Cheesman, 1928)			1	-18.247	178.08				7.7		Viti_Levu	2010-07-31			Fiji							http://dx.doi.org/10.1098/rspb.2020.0045	SAMA
preservedSpecimen		MSAPB205_11_AAO034				Lasioglossum		Lasioglossum fijiense (Perkins and Cheesman, 1928)			1	-18.247	178.08				7.7		Viti_Levu	2010-07-31			Fiji							http://dx.doi.org/10.1098/rspb.2020.0045	SAMA
preservedSpecimen		MSAPB206_11_AAO035				Lasioglossum		Lasioglossum fijiense (Perkins and Cheesman, 1928)			1	-18.247	178.08				7.7		Viti_Levu	2010-07-31			Fiji							http://dx.doi.org/10.1098/rspb.2020.0045	SAMA
preservedSpecimen		MSAPB207_11_AAO036				Lasioglossum		Lasioglossum fijiense (Perkins and Cheesman, 1928)			1	-18.247	178.08				7.7		Viti_Levu	2010-07-31			Fiji							http://dx.doi.org/10.1098/rspb.2020.0045	SAMA
preservedSpecimen		MSAPB208_11_AAO037				Lasioglossum		Lasioglossum fijiense (Perkins and Cheesman, 1928)			1	-18.247	178.08				7.7		Viti_Levu	2010-07-31			Fiji							http://dx.doi.org/10.1098/rspb.2020.0045	SAMA
preservedSpecimen		MSAPB209_11_AAO038				Lasioglossum		Lasioglossum fijiense (Perkins and Cheesman, 1928)			1	-18.247	178.08				7.7		Viti_Levu	2010-07-31			Fiji							http://dx.doi.org/10.1098/rspb.2020.0045	SAMA
preservedSpecimen		MSAPB210_11_AAP001				Lasioglossum		Lasioglossum fijiense (Perkins and Cheesman, 1928)			1	-18.233	178.073				7.1		Viti_Levu	2010-07-31			Fiji							http://dx.doi.org/10.1098/rspb.2020.0045	SAMA
preservedSpecimen		MSAPB211_11_AAP002				Lasioglossum		Lasioglossum fijiense (Perkins and Cheesman, 1928)			1	-18.233	178.073				7.1		Viti_Levu	2010-07-31			Fiji							http://dx.doi.org/10.1098/rspb.2020.0045	SAMA
preservedSpecimen		MSAPB212_11_AAP003				Lasioglossum		Lasioglossum fijiense (Perkins and Cheesman, 1928)			1	-18.233	178.073				7.1		Viti_Levu	2010-07-31			Fiji							http://dx.doi.org/10.1098/rspb.2020.0045	SAMA
preservedSpecimen		MSAPB213_11_AAP004				Lasioglossum		Lasioglossum fijiense (Perkins and Cheesman, 1928)			1	-18.233	178.073				7.1		Viti_Levu	2010-07-31			Fiji							http://dx.doi.org/10.1098/rspb.2020.0045	SAMA
preservedSpecimen		MSAPB214_11_AAP005				Lasioglossum		Lasioglossum fijiense (Perkins and Cheesman, 1928)			1	-18.233	178.073				7.1		Viti_Levu	2010-07-31			Fiji							http://dx.doi.org/10.1098/rspb.2020.0045	SAMA
preservedSpecimen		MSAPB215_11_AAP006				Lasioglossum		Lasioglossum fijiense (Perkins and Cheesman, 1928)			1	-18.233	178.073				7.1		Viti_Levu	2010-07-31			Fiji							http://dx.doi.org/10.1098/rspb.2020.0045	SAMA
preservedSpecimen		MSAPB216_11_AAP007				Lasioglossum		Lasioglossum fijiense (Perkins and Cheesman, 1928)			1	-18.233	178.073				7.1		Viti_Levu	2010-07-31			Fiji							http://dx.doi.org/10.1098/rspb.2020.0045	SAMA
preservedSpecimen		MSAPB217_11_AAP008				Lasioglossum		Lasioglossum fijiense (Perkins and Cheesman, 1928)			1	-18.233	178.073				7.1		Viti_Levu	2010-07-31			Fiji							http://dx.doi.org/10.1098/rspb.2020.0045	SAMA
preservedSpecimen		MSAPB218_11_AAP009				Lasioglossum		Lasioglossum fijiense (Perkins and Cheesman, 1928)			1	-18.233	178.073				7.1		Viti_Levu	2010-07-31			Fiji							http://dx.doi.org/10.1098/rspb.2020.0045	SAMA
preservedSpecimen		MSAPB219_11_AAP010				Lasioglossum		Lasioglossum fijiense (Perkins and Cheesman, 1928)			1	-18.233	178.073				7.1		Viti_Levu	2010-07-31			Fiji							http://dx.doi.org/10.1098/rspb.2020.0045	SAMA
preservedSpecimen		MSAPB220_11_AAR001				Lasioglossum		Lasioglossum fijiense (Perkins and Cheesman, 1928)			1	-18.233	177.79				13		Viti_Levu	2010-07-31			Fiji							http://dx.doi.org/10.1098/rspb.2020.0045	SAMA
preservedSpecimen		MSAPB221_11_AAR002				Lasioglossum		Lasioglossum fijiense (Perkins and Cheesman, 1928)			1	-18.233	177.79				13		Viti_Levu	2010-07-31			Fiji							http://dx.doi.org/10.1098/rspb.2020.0045	SAMA
preservedSpecimen		MSAPB222_11_AAR003				Lasioglossum		Lasioglossum fijiense (Perkins and Cheesman, 1928)			1	-18.233	177.79				13		Viti_Levu	2010-07-31			Fiji							http://dx.doi.org/10.1098/rspb.2020.0045	SAMA
preservedSpecimen		MSAPB223_11_AAR004				Lasioglossum		Lasioglossum fijiense (Perkins and Cheesman, 1928)			1	-18.233	177.79				13		Viti_Levu	2010-07-31			Fiji							http://dx.doi.org/10.1098/rspb.2020.0045	SAMA
preservedSpecimen		MSAPB224_11_AAR005				Lasioglossum		Lasioglossum fijiense (Perkins and Cheesman, 1928)			1	-18.233	177.79				13		Viti_Levu	2010-07-31			Fiji							http://dx.doi.org/10.1098/rspb.2020.0045	SAMA
preservedSpecimen		MSAPB225_11_AAR006				Lasioglossum		Lasioglossum fijiense (Perkins and Cheesman, 1928)			1	-18.233	177.79				13		Viti_Levu	2010-07-31			Fiji							http://dx.doi.org/10.1098/rspb.2020.0045	SAMA
preservedSpecimen		MSAPB226_11_AAR007				Lasioglossum		Lasioglossum fijiense (Perkins and Cheesman, 1928)			1	-18.233	177.79				13		Viti_Levu	2010-07-31			Fiji							http://dx.doi.org/10.1098/rspb.2020.0045	SAMA
preservedSpecimen		MSAPB227_11_AAR008				Lasioglossum		Lasioglossum fijiense (Perkins and Cheesman, 1928)			1	-18.233	177.79				13		Viti_Levu	2010-07-31			Fiji							http://dx.doi.org/10.1098/rspb.2020.0045	SAMA
preservedSpecimen		MSAPB228_11_AAT001				Lasioglossum		Lasioglossum fijiense (Perkins and Cheesman, 1928)			1	-17.928	178.561				45.1		Viti_Levu	2010-08-01			Fiji							http://dx.doi.org/10.1098/rspb.2020.0045	SAMA
preservedSpecimen		MSAPB229_11_AAT002				Lasioglossum		Lasioglossum fijiense (Perkins and Cheesman, 1928)			1	-17.928	178.561				45.1		Viti_Levu	2010-08-01			Fiji							http://dx.doi.org/10.1098/rspb.2020.0045	SAMA
preservedSpecimen		MSAPB230_11_AAT003				Lasioglossum		Lasioglossum fijiense (Perkins and Cheesman, 1928)			1	-17.928	178.561				45.1		Viti_Levu	2010-08-01			Fiji							http://dx.doi.org/10.1098/rspb.2020.0045	SAMA
preservedSpecimen		MSAPB231_11_AAT004				Lasioglossum		Lasioglossum fijiense (Perkins and Cheesman, 1928)			1	-17.928	178.561				45.1		Viti_Levu	2010-08-01			Fiji							http://dx.doi.org/10.1098/rspb.2020.0045	SAMA
preservedSpecimen		MSAPB232_11_AAU001				Lasioglossum		Lasioglossum fijiense (Perkins and Cheesman, 1928)			1	-17.76	178.403				29.8		Viti_Levu	2010-08-01			Fiji							http://dx.doi.org/10.1098/rspb.2020.0045	SAMA
preservedSpecimen		MSAPB233_11_AAU002				Lasioglossum		Lasioglossum fijiense (Perkins and Cheesman, 1928)			1	-17.76	178.403				29.8		Viti_Levu	2010-08-01			Fiji							http://dx.doi.org/10.1098/rspb.2020.0045	SAMA
preservedSpecimen		MSAPB235_11_AAW002				Lasioglossum		Lasioglossum fijiense (Perkins and Cheesman, 1928)			1	-17.382	178.158				18.7		Viti_Levu	2010-08-03			Fiji							http://dx.doi.org/10.1098/rspb.2020.0045	SAMA
preservedSpecimen		MSAPB236_11_AAW003				Lasioglossum		Lasioglossum fijiense (Perkins and Cheesman, 1928)			1	-17.382	178.158				18.7		Viti_Levu	2010-08-03			Fiji							http://dx.doi.org/10.1098/rspb.2020.0045	SAMA
preservedSpecimen		MSAPB241_11_AAX004				Lasioglossum		Lasioglossum fijiense (Perkins and Cheesman, 1928)			1	-17.37	178.079				29.2		Viti_Levu	2010-08-03			Fiji							http://dx.doi.org/10.1098/rspb.2020.0045	SAMA
preservedSpecimen		MSAPB242_11_AAX001				Lasioglossum		Lasioglossum fijiense (Perkins and Cheesman, 1928)			1	-17.37	178.079				29.2		Viti_Levu	2010-08-03			Fiji							http://dx.doi.org/10.1098/rspb.2020.0045	SAMA
preservedSpecimen		MSAPB243_11_AAX002				Lasioglossum		Lasioglossum fijiense (Perkins and Cheesman, 1928)			1	-17.37	178.079				29.2		Viti_Levu	2010-08-03			Fiji							http://dx.doi.org/10.1098/rspb.2020.0045	SAMA
preservedSpecimen		MSAPB244_11_AAX003				Lasioglossum		Lasioglossum fijiense (Perkins and Cheesman, 1928)			1	-17.37	178.079				29.2		Viti_Levu	2010-08-03			Fiji							http://dx.doi.org/10.1098/rspb.2020.0045	SAMA
preservedSpecimen		MSAPB245_11_AAY001				Lasioglossum		Lasioglossum fijiense (Perkins and Cheesman, 1928)			1	-17.396	178.013				6.8		Viti_Levu	2010-08-03			Fiji							http://dx.doi.org/10.1098/rspb.2020.0045	SAMA
preservedSpecimen		MSAPB246_11_AAY002				Lasioglossum		Lasioglossum fijiense (Perkins and Cheesman, 1928)			1	-17.396	178.013				6.8		Viti_Levu	2010-08-03			Fiji							http://dx.doi.org/10.1098/rspb.2020.0045	SAMA
preservedSpecimen		MSAPB247_11_AAY003				Lasioglossum		Lasioglossum fijiense (Perkins and Cheesman, 1928)			1	-17.396	178.013				6.8		Viti_Levu	2010-08-03			Fiji							http://dx.doi.org/10.1098/rspb.2020.0045	SAMA
preservedSpecimen		MSAPB248_11_AAY004				Lasioglossum		Lasioglossum fijiense (Perkins and Cheesman, 1928)			1	-17.396	178.013				6.8		Viti_Levu	2010-08-03			Fiji							http://dx.doi.org/10.1098/rspb.2020.0045	SAMA
preservedSpecimen		MSAPB249_11_AAY005				Lasioglossum		Lasioglossum fijiense (Perkins and Cheesman, 1928)			1	-17.396	178.013				6.8		Viti_Levu	2010-08-03			Fiji							http://dx.doi.org/10.1098/rspb.2020.0045	SAMA
preservedSpecimen		MSAPB250_11_AAY006				Lasioglossum		Lasioglossum fijiense (Perkins and Cheesman, 1928)			1	-17.396	178.013				6.8		Viti_Levu	2010-08-03			Fiji							http://dx.doi.org/10.1098/rspb.2020.0045	SAMA
preservedSpecimen		MSAPB251_11_AAY007				Lasioglossum		Lasioglossum fijiense (Perkins and Cheesman, 1928)			1	-17.396	178.013				6.8		Viti_Levu	2010-08-03			Fiji							http://dx.doi.org/10.1098/rspb.2020.0045	SAMA
preservedSpecimen		MSAPB255_11_AAZ005				Lasioglossum		Lasioglossum fijiense (Perkins and Cheesman, 1928)			1	-17.422	177.996				7.8		Viti_Levu	2010-08-03			Fiji							http://dx.doi.org/10.1098/rspb.2020.0045	SAMA
preservedSpecimen		MSAPB256_11_AAZ006				Lasioglossum		Lasioglossum fijiense (Perkins and Cheesman, 1928)			1	-17.422	177.996				7.8		Viti_Levu	2010-08-03			Fiji							http://dx.doi.org/10.1098/rspb.2020.0045	SAMA
preservedSpecimen		MSAPB257_11_AAZ007				Lasioglossum		Lasioglossum fijiense (Perkins and Cheesman, 1928)			1	-17.422	177.996				7.8		Viti_Levu	2010-08-03			Fiji							http://dx.doi.org/10.1098/rspb.2020.0045	SAMA
preservedSpecimen		MSAPB258_11_AAZ008				Lasioglossum		Lasioglossum fijiense (Perkins and Cheesman, 1928)			1	-17.422	177.996				7.8		Viti_Levu	2010-08-03			Fiji							http://dx.doi.org/10.1098/rspb.2020.0045	SAMA
preservedSpecimen		MSAPB259_11_AAZ009				Lasioglossum		Lasioglossum fijiense (Perkins and Cheesman, 1928)			1	-17.422	177.996				7.8		Viti_Levu	2010-08-03			Fiji							http://dx.doi.org/10.1098/rspb.2020.0045	SAMA
preservedSpecimen		MSAPB260_11_AAZ010				Lasioglossum		Lasioglossum fijiense (Perkins and Cheesman, 1928)			1	-17.422	177.996				7.8		Viti_Levu	2010-08-03			Fiji							http://dx.doi.org/10.1098/rspb.2020.0045	SAMA
preservedSpecimen		MSAPB263_11_ABA002				Lasioglossum		Lasioglossum fijiense (Perkins and Cheesman, 1928)			1	-17.426	177.798				14.2		Viti_Levu	2010-08-03			Fiji							http://dx.doi.org/10.1098/rspb.2020.0045	SAMA
preservedSpecimen		MSAPB269_11_ABB001				Lasioglossum		Lasioglossum fijiense (Perkins and Cheesman, 1928)			1	-17.404	177.782				23.7		Viti_Levu	2010-08-03			Fiji							http://dx.doi.org/10.1098/rspb.2020.0045	SAMA
preservedSpecimen		MSAPB270_11_ABB002				Lasioglossum		Lasioglossum fijiense (Perkins and Cheesman, 1928)			1	-17.404	177.782				23.7		Viti_Levu	2010-08-03			Fiji							http://dx.doi.org/10.1098/rspb.2020.0045	SAMA
preservedSpecimen		MSAPB271_11_ABB003				Lasioglossum		Lasioglossum fijiense (Perkins and Cheesman, 1928)			1	-17.404	177.782				23.7		Viti_Levu	2010-08-03			Fiji							http://dx.doi.org/10.1098/rspb.2020.0045	SAMA
preservedSpecimen		MSAPB272_11_ABB004				Lasioglossum		Lasioglossum fijiense (Perkins and Cheesman, 1928)			1	-17.404	177.782				23.7		Viti_Levu	2010-08-03			Fiji							http://dx.doi.org/10.1098/rspb.2020.0045	SAMA
preservedSpecimen		MSAPB273_11_ABB005				Lasioglossum		Lasioglossum fijiense (Perkins and Cheesman, 1928)			1	-17.404	177.782				23.7		Viti_Levu	2010-08-03			Fiji							http://dx.doi.org/10.1098/rspb.2020.0045	SAMA
preservedSpecimen		MSAPB274_11_ABB006				Lasioglossum		Lasioglossum fijiense (Perkins and Cheesman, 1928)			1	-17.404	177.782				23.7		Viti_Levu	2010-08-03			Fiji							http://dx.doi.org/10.1098/rspb.2020.0045	SAMA
preservedSpecimen		MSAPB279_11_ABC006				Lasioglossum		Lasioglossum fijiense (Perkins and Cheesman, 1928)			1	-17.401	177.765				17.2		Viti_Levu	2010-08-03			Fiji							http://dx.doi.org/10.1098/rspb.2020.0045	SAMA
preservedSpecimen		MSAPB280_11_ABC007				Lasioglossum		Lasioglossum fijiense (Perkins and Cheesman, 1928)			1	-17.401	177.765				17.2		Viti_Levu	2010-08-03			Fiji							http://dx.doi.org/10.1098/rspb.2020.0045	SAMA
preservedSpecimen		MSAPB281_11_ABC008				Lasioglossum		Lasioglossum fijiense (Perkins and Cheesman, 1928)			1	-17.401	177.765				17.2		Viti_Levu	2010-08-03			Fiji							http://dx.doi.org/10.1098/rspb.2020.0045	SAMA
preservedSpecimen		MSAPB282_11_ABC009				Lasioglossum		Lasioglossum fijiense (Perkins and Cheesman, 1928)			1	-17.401	177.765				17.2		Viti_Levu	2010-08-03			Fiji							http://dx.doi.org/10.1098/rspb.2020.0045	SAMA
preservedSpecimen		MSAPB283_11_ABC010				Lasioglossum		Lasioglossum fijiense (Perkins and Cheesman, 1928)			1	-17.401	177.765				17.2		Viti_Levu	2010-08-03			Fiji							http://dx.doi.org/10.1098/rspb.2020.0045	SAMA
preservedSpecimen		MSAPB287_11_ABD005				Lasioglossum		Lasioglossum fijiense (Perkins and Cheesman, 1928)			1	-17.592	177.755				28.9		Viti_Levu	2010-08-03			Fiji							http://dx.doi.org/10.1098/rspb.2020.0045	SAMA
preservedSpecimen		MSAPB288_11_ABD006				Lasioglossum		Lasioglossum fijiense (Perkins and Cheesman, 1928)			1	-17.592	177.755				28.9		Viti_Levu	2010-08-03			Fiji							http://dx.doi.org/10.1098/rspb.2020.0045	SAMA
preservedSpecimen		MSAPB289_11_ABD007				Lasioglossum		Lasioglossum fijiense (Perkins and Cheesman, 1928)			1	-17.592	177.755				28.9		Viti_Levu	2010-08-03			Fiji							http://dx.doi.org/10.1098/rspb.2020.0045	SAMA
preservedSpecimen		MSAPB290_11_ABD008				Lasioglossum		Lasioglossum fijiense (Perkins and Cheesman, 1928)			1	-17.592	177.755				28.9		Viti_Levu	2010-08-03			Fiji							http://dx.doi.org/10.1098/rspb.2020.0045	SAMA
preservedSpecimen		MSAPB292_11_ABE004				Lasioglossum		Lasioglossum fijiense (Perkins and Cheesman, 1928)			1	-17.52	177.925				187.9		Viti_Levu	2010-08-04			Fiji							http://dx.doi.org/10.1098/rspb.2020.0045	SAMA
preservedSpecimen		MSAPB293_11_ABE005				Lasioglossum		Lasioglossum fijiense (Perkins and Cheesman, 1928)			1	-17.52	177.925				187.9		Viti_Levu	2010-08-04			Fiji							http://dx.doi.org/10.1098/rspb.2020.0045	SAMA
preservedSpecimen		MSAPB294_11_ABE006				Lasioglossum		Lasioglossum fijiense (Perkins and Cheesman, 1928)			1	-17.52	177.925				187.9		Viti_Levu	2010-08-04			Fiji							http://dx.doi.org/10.1098/rspb.2020.0045	SAMA
preservedSpecimen		MSAPB295_11_ABE007				Lasioglossum		Lasioglossum fijiense (Perkins and Cheesman, 1928)			1	-17.52	177.925				187.9		Viti_Levu	2010-08-04			Fiji							http://dx.doi.org/10.1098/rspb.2020.0045	SAMA
preservedSpecimen		MSAPB296_11_ABE008				Lasioglossum		Lasioglossum fijiense (Perkins and Cheesman, 1928)			1	-17.52	177.925				187.9		Viti_Levu	2010-08-04			Fiji							http://dx.doi.org/10.1098/rspb.2020.0045	SAMA
preservedSpecimen		MSAPB297_11_ABE009				Lasioglossum		Lasioglossum fijiense (Perkins and Cheesman, 1928)			1	-17.52	177.925				187.9		Viti_Levu	2010-08-04			Fiji							http://dx.doi.org/10.1098/rspb.2020.0045	SAMA
preservedSpecimen		MSAPB298_11_ABE010				Lasioglossum		Lasioglossum fijiense (Perkins and Cheesman, 1928)			1	-17.52	177.925				187.9		Viti_Levu	2010-08-04			Fiji							http://dx.doi.org/10.1098/rspb.2020.0045	SAMA
preservedSpecimen		MSAPB299_11_ABE011				Lasioglossum		Lasioglossum fijiense (Perkins and Cheesman, 1928)			1	-17.52	177.925				187.9		Viti_Levu	2010-08-04			Fiji							http://dx.doi.org/10.1098/rspb.2020.0045	SAMA
preservedSpecimen		MSAPB300_11_ABE012				Lasioglossum		Lasioglossum fijiense (Perkins and Cheesman, 1928)			1	-17.52	177.925				187.9		Viti_Levu	2010-08-04			Fiji							http://dx.doi.org/10.1098/rspb.2020.0045	SAMA
preservedSpecimen		MSAPB304_11_ABF004				Lasioglossum		Lasioglossum fijiense (Perkins and Cheesman, 1928)			1	-17.549	177.943				235		Viti_Levu	2010-08-04			Fiji							http://dx.doi.org/10.1098/rspb.2020.0045	SAMA
preservedSpecimen		MSAPB305_11_ABF005				Lasioglossum		Lasioglossum fijiense (Perkins and Cheesman, 1928)			1	-17.549	177.943				235		Viti_Levu	2010-08-04			Fiji							http://dx.doi.org/10.1098/rspb.2020.0045	SAMA
preservedSpecimen		MSAPB306_11_ABF006				Lasioglossum		Lasioglossum fijiense (Perkins and Cheesman, 1928)			1	-17.549	177.943				235		Viti_Levu	2010-08-04			Fiji							http://dx.doi.org/10.1098/rspb.2020.0045	SAMA
preservedSpecimen		MSAPB307_11_ABF007				Lasioglossum		Lasioglossum fijiense (Perkins and Cheesman, 1928)			1	-17.549	177.943				235		Viti_Levu	2010-08-04			Fiji							http://dx.doi.org/10.1098/rspb.2020.0045	SAMA
preservedSpecimen		MSAPB311_11_ABH001				Lasioglossum		Lasioglossum fijiense (Perkins and Cheesman, 1928)			1	-17.572	177.96				787.9		Viti_Levu	2010-08-04			Fiji							http://dx.doi.org/10.1098/rspb.2020.0045	SAMA
preservedSpecimen		MSAPB312_11_ABH002				Lasioglossum		Lasioglossum fijiense (Perkins and Cheesman, 1928)			1	-17.572	177.96				787.9		Viti_Levu	2010-08-04			Fiji							http://dx.doi.org/10.1098/rspb.2020.0045	SAMA
preservedSpecimen		MSAPB313_11_ABH003				Lasioglossum		Lasioglossum fijiense (Perkins and Cheesman, 1928)			1	-17.572	177.96				787.9		Viti_Levu	2010-08-04			Fiji							http://dx.doi.org/10.1098/rspb.2020.0045	SAMA
preservedSpecimen		MSAPB314_11_ABH004				Lasioglossum		Lasioglossum tuiwawae (Dorey, Schwarz and Stevens, 2019)			1	-17.572	177.96				787.9		Viti_Levu	2010-08-04			Fiji							http://dx.doi.org/10.1098/rspb.2020.0045	SAMA
preservedSpecimen		MSAPB315_11_ABH005				Lasioglossum		Lasioglossum fijiense (Perkins and Cheesman, 1928)			1	-17.572	177.96				787.9		Viti_Levu	2010-08-04			Fiji							http://dx.doi.org/10.1098/rspb.2020.0045	SAMA
preservedSpecimen		MSAPB316_11_ABH006				Lasioglossum		Lasioglossum tuiwawae (Dorey, Schwarz and Stevens, 2019)			1	-17.572	177.96				787.9		Viti_Levu	2010-08-04			Fiji							http://dx.doi.org/10.1098/rspb.2020.0045	SAMA
preservedSpecimen		MSAPB317_11_ABI001				Lasioglossum		Lasioglossum fijiense (Perkins and Cheesman, 1928)			1	-17.595	177.967				729.1		Viti_Levu	2010-08-04			Fiji							http://dx.doi.org/10.1098/rspb.2020.0045	SAMA
preservedSpecimen		MSAPB318_11_ABI002				Lasioglossum		Lasioglossum fijiense (Perkins and Cheesman, 1928)			1	-17.595	177.967				729.1		Viti_Levu	2010-08-04			Fiji							http://dx.doi.org/10.1098/rspb.2020.0045	SAMA
preservedSpecimen		MSAPB319_11_ABI003				Lasioglossum		Lasioglossum fijiense (Perkins and Cheesman, 1928)			1	-17.595	177.967				729.1		Viti_Levu	2010-08-04			Fiji							http://dx.doi.org/10.1098/rspb.2020.0045	SAMA
preservedSpecimen		MSAPB320_11_ABI004				Lasioglossum		Lasioglossum groomi (Dorey, Schwarz and Stevens, 2019)			1	-17.595	177.967				729.1		Viti_Levu	2010-08-04			Fiji							http://dx.doi.org/10.1098/rspb.2020.0045	SAMA
preservedSpecimen		MSAPB321_11_ABI005				Lasioglossum		Lasioglossum tuiwawae (Dorey, Schwarz and Stevens, 2019)			1	-17.595	177.967				729.1		Viti_Levu	2010-08-04			Fiji							http://dx.doi.org/10.1098/rspb.2020.0045	SAMA
preservedSpecimen		MSAPB322_11_ABI006				Lasioglossum		Lasioglossum fijiense (Perkins and Cheesman, 1928)			1	-17.595	177.967				729.1		Viti_Levu	2010-08-04			Fiji							http://dx.doi.org/10.1098/rspb.2020.0045	SAMA
preservedSpecimen		MSAPB323_11_ABI007				Lasioglossum		Lasioglossum fijiense (Perkins and Cheesman, 1928)			1	-17.595	177.967				729.1		Viti_Levu	2010-08-04			Fiji							http://dx.doi.org/10.1098/rspb.2020.0045	SAMA
preservedSpecimen		MSAPB324_11_ABI008				Lasioglossum		Lasioglossum fijiense (Perkins and Cheesman, 1928)			1	-17.595	177.967				729.1		Viti_Levu	2010-08-04			Fiji							http://dx.doi.org/10.1098/rspb.2020.0045	SAMA
preservedSpecimen		MSAPB325_11_ABJ001				Lasioglossum		Lasioglossum tuiwawae (Dorey, Schwarz and Stevens, 2019)			1	-17.612	177.986				712.3		Viti_Levu	2010-08-04			Fiji							http://dx.doi.org/10.1098/rspb.2020.0045	SAMA
preservedSpecimen		MSAPB326_11_ABJ002				Lasioglossum		Lasioglossum fijiense (Perkins and Cheesman, 1928)			1	-17.612	177.986				712.3		Viti_Levu	2010-08-04			Fiji							http://dx.doi.org/10.1098/rspb.2020.0045	SAMA
preservedSpecimen		MSAPB329_11_ABJ005				Lasioglossum		Lasioglossum fijiense (Perkins and Cheesman, 1928)			1	-17.612	177.986				712.3		Viti_Levu	2010-08-04			Fiji							http://dx.doi.org/10.1098/rspb.2020.0045	SAMA
preservedSpecimen		MSAPB330_11_ABJ006				Lasioglossum		Lasioglossum fijiense (Perkins and Cheesman, 1928)			1	-17.612	177.986				712.3		Viti_Levu	2010-08-04			Fiji							http://dx.doi.org/10.1098/rspb.2020.0045	SAMA
preservedSpecimen		MSAPB331_11_ABJ007				Lasioglossum		Lasioglossum fijiense (Perkins and Cheesman, 1928)			1	-17.612	177.986				712.3		Viti_Levu	2010-08-04			Fiji							http://dx.doi.org/10.1098/rspb.2020.0045	SAMA
preservedSpecimen		MSAPB332_11_ABJ008				Lasioglossum		Lasioglossum fijiense (Perkins and Cheesman, 1928)			1	-17.612	177.986				712.3		Viti_Levu	2010-08-04			Fiji							http://dx.doi.org/10.1098/rspb.2020.0045	SAMA
preservedSpecimen		MSAPB333_11_ABK001				Lasioglossum		Lasioglossum fijiense (Perkins and Cheesman, 1928)			1	-17.673	178				824.1		Viti_Levu	2010-08-04			Fiji							http://dx.doi.org/10.1098/rspb.2020.0045	SAMA
preservedSpecimen		MSAPB335_11_ABK003				Lasioglossum		Lasioglossum fijiense (Perkins and Cheesman, 1928)			1	-17.673	178				824.1		Viti_Levu	2010-08-04			Fiji							http://dx.doi.org/10.1098/rspb.2020.0045	SAMA
preservedSpecimen		MSAPB336_11_ABK004				Lasioglossum		Lasioglossum fijiense (Perkins and Cheesman, 1928)			1	-17.673	178				824.1		Viti_Levu	2010-08-04			Fiji							http://dx.doi.org/10.1098/rspb.2020.0045	SAMA
preservedSpecimen		MSAPB337_11_ABL001				Lasioglossum		Lasioglossum Species K			1	-17.678	178.001				841.9		Viti_Levu	2010-08-04			Fiji							http://dx.doi.org/10.1098/rspb.2020.0045	SAMA
preservedSpecimen		MSAPB338_11_ABL002				Lasioglossum		Lasioglossum tuiwawae (Dorey, Schwarz and Stevens, 2019)			1	-17.678	178.001				841.9		Viti_Levu	2010-08-04			Fiji							http://dx.doi.org/10.1098/rspb.2020.0045	SAMA
preservedSpecimen		MSAPB339_11_ABL003				Lasioglossum		Lasioglossum tuiwawae (Dorey, Schwarz and Stevens, 2019)			1	-17.678	178.001				841.9		Viti_Levu	2010-08-04			Fiji							http://dx.doi.org/10.1098/rspb.2020.0045	SAMA
preservedSpecimen		MSAPB340_11_ABN001				Lasioglossum		Lasioglossum tuiwawae (Dorey, Schwarz and Stevens, 2019)			1	-17.735	178.075				665.1		Viti_Levu	2010-08-04			Fiji							http://dx.doi.org/10.1098/rspb.2020.0045	SAMA
preservedSpecimen		MSAPB341_11_ABN002				Lasioglossum		Lasioglossum tuiwawae (Dorey, Schwarz and Stevens, 2019)			1	-17.735	178.075				665.1		Viti_Levu	2010-08-04			Fiji							http://dx.doi.org/10.1098/rspb.2020.0045	SAMA
preservedSpecimen		MSAPB342_11_ABN003				Lasioglossum		Lasioglossum tuiwawae (Dorey, Schwarz and Stevens, 2019)			1	-17.735	178.075				665.1		Viti_Levu	2010-08-04			Fiji							http://dx.doi.org/10.1098/rspb.2020.0045	SAMA
preservedSpecimen		MSAPB343_11_ABO001				Lasioglossum		Lasioglossum fijiense (Perkins and Cheesman, 1928)			1	-17.727	178.084				356.8		Viti_Levu	2010-08-04			Fiji							http://dx.doi.org/10.1098/rspb.2020.0045	SAMA
preservedSpecimen		MSAPB344_11_ABO002				Lasioglossum		Lasioglossum fijiense (Perkins and Cheesman, 1928)			1	-17.727	178.084				356.8		Viti_Levu	2010-08-04			Fiji							http://dx.doi.org/10.1098/rspb.2020.0045	SAMA
preservedSpecimen		MSAPB345_11_ABO003				Lasioglossum		Lasioglossum fijiense (Perkins and Cheesman, 1928)			1	-17.727	178.084				356.8		Viti_Levu	2010-08-04			Fiji							http://dx.doi.org/10.1098/rspb.2020.0045	SAMA
preservedSpecimen		MSAPB346_11_ABO004				Lasioglossum		Lasioglossum fijiense (Perkins and Cheesman, 1928)			1	-17.727	178.084				356.8		Viti_Levu	2010-08-04			Fiji							http://dx.doi.org/10.1098/rspb.2020.0045	SAMA
preservedSpecimen		MSAPB347_11_ABO005				Lasioglossum		Lasioglossum fijiense (Perkins and Cheesman, 1928)			1	-17.727	178.084				356.8		Viti_Levu	2010-08-04			Fiji							http://dx.doi.org/10.1098/rspb.2020.0045	SAMA
preservedSpecimen		MSAPB348_11_ABO006				Lasioglossum		Lasioglossum fijiense (Perkins and Cheesman, 1928)			1	-17.727	178.084				356.8		Viti_Levu	2010-08-04			Fiji							http://dx.doi.org/10.1098/rspb.2020.0045	SAMA
preservedSpecimen		MSAPB349_11_ABP001				Lasioglossum		Lasioglossum fijiense (Perkins and Cheesman, 1928)			1	-17.773	178.127				170.4		Viti_Levu	2010-08-04			Fiji							http://dx.doi.org/10.1098/rspb.2020.0045	SAMA
preservedSpecimen		MSAPB350_11_ABP002				Lasioglossum		Lasioglossum fijiense (Perkins and Cheesman, 1928)			1	-17.773	178.127				170.4		Viti_Levu	2010-08-04			Fiji							http://dx.doi.org/10.1098/rspb.2020.0045	SAMA
preservedSpecimen		MSAPB351_11_ABQ001				Lasioglossum		Lasioglossum fijiense (Perkins and Cheesman, 1928)			1	-19.047	178.165				26.5		Kadavu	2010-08-06			Fiji							http://dx.doi.org/10.1098/rspb.2020.0045	SAMA
preservedSpecimen		MSAPB352_11_ABQ002				Lasioglossum		Lasioglossum fijiense (Perkins and Cheesman, 1928)			1	-19.047	178.165				26.5		Kadavu	2010-08-06			Fiji							http://dx.doi.org/10.1098/rspb.2020.0045	SAMA
preservedSpecimen		MSAPB353_11_ABQ003				Lasioglossum		Lasioglossum fijiense (Perkins and Cheesman, 1928)			1	-19.047	178.165				26.5		Kadavu	2010-08-06			Fiji							http://dx.doi.org/10.1098/rspb.2020.0045	SAMA
preservedSpecimen		MSAPB354_11_ABQ004				Lasioglossum		Lasioglossum fijiense (Perkins and Cheesman, 1928)			1	-19.047	178.165				26.5		Kadavu	2010-08-06			Fiji							http://dx.doi.org/10.1098/rspb.2020.0045	SAMA
preservedSpecimen		MSAPB355_11_ABQ005				Lasioglossum		Lasioglossum fijiense (Perkins and Cheesman, 1928)			1	-19.047	178.165				26.5		Kadavu	2010-08-06			Fiji							http://dx.doi.org/10.1098/rspb.2020.0045	SAMA
preservedSpecimen		MSAPB356_11_ABQ006				Lasioglossum		Lasioglossum fijiense (Perkins and Cheesman, 1928)			1	-19.047	178.165				26.5		Kadavu	2010-08-06			Fiji							http://dx.doi.org/10.1098/rspb.2020.0045	SAMA
preservedSpecimen		MSAPB357_11_ABR001				Lasioglossum		Lasioglossum fijiense (Perkins and Cheesman, 1928)			1	-19.042	178.17				62.1		Kadavu	2010-08-06			Fiji							http://dx.doi.org/10.1098/rspb.2020.0045	SAMA
preservedSpecimen		MSAPB358_11_ABR002				Lasioglossum		Lasioglossum fijiense (Perkins and Cheesman, 1928)			1	-19.042	178.17				62.1		Kadavu	2010-08-06			Fiji							http://dx.doi.org/10.1098/rspb.2020.0045	SAMA
preservedSpecimen		MSAPB359_11_ABR003				Lasioglossum		Lasioglossum fijiense (Perkins and Cheesman, 1928)			1	-19.042	178.17				62.1		Kadavu	2010-08-06			Fiji							http://dx.doi.org/10.1098/rspb.2020.0045	SAMA
preservedSpecimen		MSAPB360_11_ABR004				Lasioglossum		Lasioglossum fijiense (Perkins and Cheesman, 1928)			1	-19.042	178.17				62.1		Kadavu	2010-08-06			Fiji							http://dx.doi.org/10.1098/rspb.2020.0045	SAMA
preservedSpecimen		MSAPB361_11_ABR005				Lasioglossum		Lasioglossum fijiense (Perkins and Cheesman, 1928)			1	-19.042	178.17				62.1		Kadavu	2010-08-06			Fiji							http://dx.doi.org/10.1098/rspb.2020.0045	SAMA
preservedSpecimen		MSAPB362_11_ABR006				Lasioglossum		Lasioglossum fijiense (Perkins and Cheesman, 1928)			1	-19.042	178.17				62.1		Kadavu	2010-08-06			Fiji							http://dx.doi.org/10.1098/rspb.2020.0045	SAMA
preservedSpecimen		MSAPB363_11_ABS001				Lasioglossum		Lasioglossum fijiense (Perkins and Cheesman, 1928)			1	-19.042	178.17				62.1		Kadavu	2010-08-06			Fiji							http://dx.doi.org/10.1098/rspb.2020.0045	SAMA
preservedSpecimen		MSAPB364_11_ABS002				Lasioglossum		Lasioglossum fijiense (Perkins and Cheesman, 1928)			1	-19.042	178.17				62.1		Kadavu	2010-08-06			Fiji							http://dx.doi.org/10.1098/rspb.2020.0045	SAMA
preservedSpecimen		MSAPB365_11_ABS003				Lasioglossum		Lasioglossum fijiense (Perkins and Cheesman, 1928)			1	-19.042	178.17				62.1		Kadavu	2010-08-06			Fiji							http://dx.doi.org/10.1098/rspb.2020.0045	SAMA
preservedSpecimen		MSAPB366_11_ABS004				Lasioglossum		Lasioglossum fijiense (Perkins and Cheesman, 1928)			1	-19.042	178.17				62.1		Kadavu	2010-08-06			Fiji							http://dx.doi.org/10.1098/rspb.2020.0045	SAMA
preservedSpecimen		MSAPB367_11_ABS005				Lasioglossum		Lasioglossum fijiense (Perkins and Cheesman, 1928)			1	-19.042	178.17				62.1		Kadavu	2010-08-06			Fiji							http://dx.doi.org/10.1098/rspb.2020.0045	SAMA
preservedSpecimen		MSAPB368_11_ABT001				Lasioglossum		Lasioglossum fijiense (Perkins and Cheesman, 1928)			1	-19.038	178.17				71.8		Kadavu	2010-08-06			Fiji							http://dx.doi.org/10.1098/rspb.2020.0045	SAMA
preservedSpecimen		MSAPB369_11_ABT002				Lasioglossum		Lasioglossum fijiense (Perkins and Cheesman, 1928)			1	-19.038	178.17				71.8		Kadavu	2010-08-06			Fiji							http://dx.doi.org/10.1098/rspb.2020.0045	SAMA
preservedSpecimen		MSAPB370_11_ABT003				Lasioglossum		Lasioglossum fijiense (Perkins and Cheesman, 1928)			1	-19.038	178.17				71.8		Kadavu	2010-08-06			Fiji							http://dx.doi.org/10.1098/rspb.2020.0045	SAMA
preservedSpecimen		MSAPB371_11_ABT004				Lasioglossum		Lasioglossum fijiense (Perkins and Cheesman, 1928)			1	-19.038	178.17				71.8		Kadavu	2010-08-06			Fiji							http://dx.doi.org/10.1098/rspb.2020.0045	SAMA
preservedSpecimen		MSAPB372_11_ABT005				Lasioglossum		Lasioglossum fijiense (Perkins and Cheesman, 1928)			1	-19.038	178.17				71.8		Kadavu	2010-08-06			Fiji							http://dx.doi.org/10.1098/rspb.2020.0045	SAMA
preservedSpecimen		MSAPB373_11_ABT006				Lasioglossum		Lasioglossum fijiense (Perkins and Cheesman, 1928)			1	-19.038	178.17				71.8		Kadavu	2010-08-06			Fiji							http://dx.doi.org/10.1098/rspb.2020.0045	SAMA
preservedSpecimen		MSAPB374_11_ABT007				Lasioglossum		Lasioglossum fijiense (Perkins and Cheesman, 1928)			1	-19.038	178.17				71.8		Kadavu	2010-08-06			Fiji							http://dx.doi.org/10.1098/rspb.2020.0045	SAMA
preservedSpecimen		MSAPB375_11_ABT008				Lasioglossum		Lasioglossum fijiense (Perkins and Cheesman, 1928)			1	-19.038	178.17				71.8		Kadavu	2010-08-06			Fiji							http://dx.doi.org/10.1098/rspb.2020.0045	SAMA
preservedSpecimen		MSAPB376_11_ABT009				Lasioglossum		Lasioglossum fijiense (Perkins and Cheesman, 1928)			1	-19.038	178.17				71.8		Kadavu	2010-08-06			Fiji							http://dx.doi.org/10.1098/rspb.2020.0045	SAMA
preservedSpecimen		MSAPB377_11_ABU001				Lasioglossum		Lasioglossum fijiense (Perkins and Cheesman, 1928)			1	-19.041	178.17				64.3		Kadavu	2010-08-06			Fiji							http://dx.doi.org/10.1098/rspb.2020.0045	SAMA
preservedSpecimen		MSAPB378_11_ABU002				Lasioglossum		Lasioglossum fijiense (Perkins and Cheesman, 1928)			1	-19.041	178.17				64.3		Kadavu	2010-08-06			Fiji							http://dx.doi.org/10.1098/rspb.2020.0045	SAMA
preservedSpecimen		MSAPB379_11_ABU003				Lasioglossum		Lasioglossum fijiense (Perkins and Cheesman, 1928)			1	-19.041	178.17				64.3		Kadavu	2010-08-06			Fiji							http://dx.doi.org/10.1098/rspb.2020.0045	SAMA
preservedSpecimen		MSAPB380_11_ABU004				Lasioglossum		Lasioglossum fijiense (Perkins and Cheesman, 1928)			1	-19.041	178.17				64.3		Kadavu	2010-08-06			Fiji							http://dx.doi.org/10.1098/rspb.2020.0045	SAMA
preservedSpecimen		MSAPB381_11_ABU005				Lasioglossum		Lasioglossum fijiense (Perkins and Cheesman, 1928)			1	-19.041	178.17				64.3		Kadavu	2010-08-06			Fiji							http://dx.doi.org/10.1098/rspb.2020.0045	SAMA
preservedSpecimen		MSAPB382_11_ABU006				Lasioglossum		Lasioglossum fijiense (Perkins and Cheesman, 1928)			1	-19.041	178.17				64.3		Kadavu	2010-08-06			Fiji							http://dx.doi.org/10.1098/rspb.2020.0045	SAMA
preservedSpecimen		MSAPB383_11_ABU007				Lasioglossum		Lasioglossum fijiense (Perkins and Cheesman, 1928)			1	-19.041	178.17				64.3		Kadavu	2010-08-06			Fiji							http://dx.doi.org/10.1098/rspb.2020.0045	SAMA
preservedSpecimen		MSAPB384_11_ABU008				Lasioglossum		Lasioglossum fijiense (Perkins and Cheesman, 1928)			1	-19.041	178.17				64.3		Kadavu	2010-08-06			Fiji							http://dx.doi.org/10.1098/rspb.2020.0045	SAMA
preservedSpecimen		MSAPB385_11_ABV001				Lasioglossum		Lasioglossum fijiense (Perkins and Cheesman, 1928)			1	-19.046	178.162				7.1		Kadavu	2010-08-06			Fiji							http://dx.doi.org/10.1098/rspb.2020.0045	SAMA
preservedSpecimen		MSAPB386_11_ABV002				Lasioglossum		Lasioglossum fijiense (Perkins and Cheesman, 1928)			1	-19.046	178.162				7.1		Kadavu	2010-08-06			Fiji							http://dx.doi.org/10.1098/rspb.2020.0045	SAMA
preservedSpecimen		MSAPB387_11_ABV003				Lasioglossum		Lasioglossum fijiense (Perkins and Cheesman, 1928)			1	-19.046	178.162				7.1		Kadavu	2010-08-06			Fiji							http://dx.doi.org/10.1098/rspb.2020.0045	SAMA
preservedSpecimen		MSAPB388_11_ABV004				Lasioglossum		Lasioglossum fijiense (Perkins and Cheesman, 1928)			1	-19.046	178.162				7.1		Kadavu	2010-08-06			Fiji							http://dx.doi.org/10.1098/rspb.2020.0045	SAMA
preservedSpecimen		MSAPB389_11_ABV005				Lasioglossum		Lasioglossum fijiense (Perkins and Cheesman, 1928)			1	-19.046	178.162				7.1		Kadavu	2010-08-06			Fiji							http://dx.doi.org/10.1098/rspb.2020.0045	SAMA
preservedSpecimen		MSAPB390_11_ABW002				Lasioglossum		Lasioglossum fijiense (Perkins and Cheesman, 1928)			1	-18.953	178.378				14.4		Kadavu	2010-08-07			Fiji							http://dx.doi.org/10.1098/rspb.2020.0045	SAMA
preservedSpecimen		MSAPB391_11_ABW003				Lasioglossum		Lasioglossum fijiense (Perkins and Cheesman, 1928)			1	-18.953	178.378				14.4		Kadavu	2010-08-07			Fiji							http://dx.doi.org/10.1098/rspb.2020.0045	SAMA
preservedSpecimen		MSAPB392_11_ABW004				Lasioglossum		Lasioglossum fijiense (Perkins and Cheesman, 1928)			1	-18.953	178.378				14.4		Kadavu	2010-08-07			Fiji							http://dx.doi.org/10.1098/rspb.2020.0045	SAMA
preservedSpecimen		MSAPB393_11_ABW005				Lasioglossum		Lasioglossum fijiense (Perkins and Cheesman, 1928)			1	-18.953	178.378				14.4		Kadavu	2010-08-07			Fiji							http://dx.doi.org/10.1098/rspb.2020.0045	SAMA
preservedSpecimen		MSAPB394_11_ABW006				Lasioglossum		Lasioglossum fijiense (Perkins and Cheesman, 1928)			1	-18.953	178.378				14.4		Kadavu	2010-08-07			Fiji							http://dx.doi.org/10.1098/rspb.2020.0045	SAMA
preservedSpecimen		MSAPB395_11_ABY001				Lasioglossum		Lasioglossum fijiense (Perkins and Cheesman, 1928)			1	-18.96	178.375				33.4		Kadavu	2010-08-08			Fiji							http://dx.doi.org/10.1098/rspb.2020.0045	SAMA
preservedSpecimen		MSAPB396_11_ABY002				Lasioglossum		Lasioglossum fijiense (Perkins and Cheesman, 1928)			1	-18.96	178.375				33.4		Kadavu	2010-08-08			Fiji							http://dx.doi.org/10.1098/rspb.2020.0045	SAMA
preservedSpecimen		MSAPB397_11_ABY003				Lasioglossum		Lasioglossum fijiense (Perkins and Cheesman, 1928)			1	-18.96	178.375				33.4		Kadavu	2010-08-08			Fiji							http://dx.doi.org/10.1098/rspb.2020.0045	SAMA
preservedSpecimen		MSAPB398_11_ABY004				Lasioglossum		Lasioglossum fijiense (Perkins and Cheesman, 1928)			1	-18.96	178.375				33.4		Kadavu	2010-08-08			Fiji							http://dx.doi.org/10.1098/rspb.2020.0045	SAMA
preservedSpecimen		MSAPB399_11_ABY005				Lasioglossum		Lasioglossum fijiense (Perkins and Cheesman, 1928)			1	-18.96	178.375				33.4		Kadavu	2010-08-08			Fiji							http://dx.doi.org/10.1098/rspb.2020.0045	SAMA
preservedSpecimen		MSAPB400_11_ABY011				Lasioglossum		Lasioglossum fijiense (Perkins and Cheesman, 1928)			1	-18.96	178.375				33.4		Kadavu	2010-08-08			Fiji							http://dx.doi.org/10.1098/rspb.2020.0045	SAMA
preservedSpecimen		MSAPB401_11_ABY012				Lasioglossum		Lasioglossum fijiense (Perkins and Cheesman, 1928)			1	-18.96	178.375				33.4		Kadavu	2010-08-08			Fiji							http://dx.doi.org/10.1098/rspb.2020.0045	SAMA
preservedSpecimen		MSAPB402_11_ABY013				Lasioglossum		Lasioglossum fijiense (Perkins and Cheesman, 1928)			1	-18.96	178.375				33.4		Kadavu	2010-08-08			Fiji							http://dx.doi.org/10.1098/rspb.2020.0045	SAMA
preservedSpecimen		MSAPB403_11_ABY014				Lasioglossum		Lasioglossum fijiense (Perkins and Cheesman, 1928)			1	-18.96	178.375				33.4		Kadavu	2010-08-08			Fiji							http://dx.doi.org/10.1098/rspb.2020.0045	SAMA
preservedSpecimen		MSAPB404_11_ABZ001				Lasioglossum		Lasioglossum fijiense (Perkins and Cheesman, 1928)			1	-18.957	178.375				16.6		Kadavu	2010-08-08			Fiji							http://dx.doi.org/10.1098/rspb.2020.0045	SAMA
preservedSpecimen		MSAPB405_11_ABZ002				Lasioglossum		Lasioglossum fijiense (Perkins and Cheesman, 1928)			1	-18.957	178.375				16.6		Kadavu	2010-08-08			Fiji							http://dx.doi.org/10.1098/rspb.2020.0045	SAMA
preservedSpecimen		MSAPB406_11_ABZ003				Lasioglossum		Lasioglossum fijiense (Perkins and Cheesman, 1928)			1	-18.957	178.375				16.6		Kadavu	2010-08-08			Fiji							http://dx.doi.org/10.1098/rspb.2020.0045	SAMA
preservedSpecimen		MSAPB407_11_ABZ004				Lasioglossum		Lasioglossum fijiense (Perkins and Cheesman, 1928)			1	-18.957	178.375				16.6		Kadavu	2010-08-08			Fiji							http://dx.doi.org/10.1098/rspb.2020.0045	SAMA
preservedSpecimen		MSAPB408_11_ABZ005				Lasioglossum		Lasioglossum fijiense (Perkins and Cheesman, 1928)			1	-18.957	178.375				16.6		Kadavu	2010-08-08			Fiji							http://dx.doi.org/10.1098/rspb.2020.0045	SAMA
preservedSpecimen		MSAPB410_11_ACA002				Lasioglossum		Lasioglossum fijiense (Perkins and Cheesman, 1928)			1	-18.984	178.408				4.3		Kadavu	2010-08-10			Fiji							http://dx.doi.org/10.1098/rspb.2020.0045	SAMA
preservedSpecimen		MSAPB411_11_ACA003				Lasioglossum		Lasioglossum fijiense (Perkins and Cheesman, 1928)			1	-18.984	178.408				4.3		Kadavu	2010-08-10			Fiji							http://dx.doi.org/10.1098/rspb.2020.0045	SAMA
preservedSpecimen		MSAPB412_11_ACA004				Lasioglossum		Lasioglossum fijiense (Perkins and Cheesman, 1928)			1	-18.984	178.408				4.3		Kadavu	2010-08-10			Fiji							http://dx.doi.org/10.1098/rspb.2020.0045	SAMA
preservedSpecimen		MSAPB413_11_ACA006				Lasioglossum		Lasioglossum fijiense (Perkins and Cheesman, 1928)			1	-18.984	178.408				4.3		Kadavu	2010-08-10			Fiji							http://dx.doi.org/10.1098/rspb.2020.0045	SAMA
preservedSpecimen		MSAPB414_11_ACA005				Lasioglossum		Lasioglossum fijiense (Perkins and Cheesman, 1928)			1	-18.984	178.408				4.3		Kadavu	2010-08-10			Fiji							http://dx.doi.org/10.1098/rspb.2020.0045	SAMA
preservedSpecimen		MSAPB415_11_ACA008				Lasioglossum		Lasioglossum fijiense (Perkins and Cheesman, 1928)			1	-18.984	178.408				4.3		Kadavu	2010-08-10			Fiji							http://dx.doi.org/10.1098/rspb.2020.0045	SAMA
preservedSpecimen		MSAPB416_11_ACA009				Lasioglossum		Lasioglossum fijiense (Perkins and Cheesman, 1928)			1	-18.984	178.408				4.3		Kadavu	2010-08-10			Fiji							http://dx.doi.org/10.1098/rspb.2020.0045	SAMA
preservedSpecimen		MSAPB417_11_ACA010				Lasioglossum		Lasioglossum fijiense (Perkins and Cheesman, 1928)			1	-18.984	178.408				4.3		Kadavu	2010-08-10			Fiji							http://dx.doi.org/10.1098/rspb.2020.0045	SAMA
preservedSpecimen		MSAPB418_11_ACA011				Lasioglossum		Lasioglossum fijiense (Perkins and Cheesman, 1928)			1	-18.984	178.408				4.3		Kadavu	2010-08-10			Fiji							http://dx.doi.org/10.1098/rspb.2020.0045	SAMA
preservedSpecimen		MSAPB419_11_ACA012				Lasioglossum		Lasioglossum fijiense (Perkins and Cheesman, 1928)			1	-18.984	178.408				4.3		Kadavu	2010-08-10			Fiji							http://dx.doi.org/10.1098/rspb.2020.0045	SAMA
preservedSpecimen		MSAPB420_11_ACB001				Lasioglossum		Lasioglossum fijiense (Perkins and Cheesman, 1928)			1	-18.994	178.411				26.4		Kadavu	2010-08-10			Fiji							http://dx.doi.org/10.1098/rspb.2020.0045	SAMA
preservedSpecimen		MSAPB421_11_ACB002				Lasioglossum		Lasioglossum fijiense (Perkins and Cheesman, 1928)			1	-18.994	178.411				26.4		Kadavu	2010-08-10			Fiji							http://dx.doi.org/10.1098/rspb.2020.0045	SAMA
preservedSpecimen		MSAPB422_11_ACB003				Lasioglossum		Lasioglossum fijiense (Perkins and Cheesman, 1928)			1	-18.994	178.411				26.4		Kadavu	2010-08-10			Fiji							http://dx.doi.org/10.1098/rspb.2020.0045	SAMA
preservedSpecimen		MSAPB423_11_ACB004				Lasioglossum		Lasioglossum fijiense (Perkins and Cheesman, 1928)			1	-18.994	178.411				26.4		Kadavu	2010-08-10			Fiji							http://dx.doi.org/10.1098/rspb.2020.0045	SAMA
preservedSpecimen		MSAPB424_11_ACB005				Lasioglossum		Lasioglossum fijiense (Perkins and Cheesman, 1928)			1	-18.994	178.411				26.4		Kadavu	2010-08-10			Fiji							http://dx.doi.org/10.1098/rspb.2020.0045	SAMA
preservedSpecimen		MSAPB426_11_ACB015				Lasioglossum		Lasioglossum fijiense (Perkins and Cheesman, 1928)			1	-18.994	178.411				26.4		Kadavu	2010-08-10			Fiji							http://dx.doi.org/10.1098/rspb.2020.0045	SAMA
preservedSpecimen		MSAPB427_11_ACB016				Lasioglossum		Lasioglossum fijiense (Perkins and Cheesman, 1928)			1	-18.994	178.411				26.4		Kadavu	2010-08-10			Fiji							http://dx.doi.org/10.1098/rspb.2020.0045	SAMA
preservedSpecimen		MSAPB428_11_ACB017				Lasioglossum		Lasioglossum fijiense (Perkins and Cheesman, 1928)			1	-18.994	178.411				26.4		Kadavu	2010-08-10			Fiji							http://dx.doi.org/10.1098/rspb.2020.0045	SAMA
preservedSpecimen		MSAPB429_11_ACB018				Lasioglossum		Lasioglossum fijiense (Perkins and Cheesman, 1928)			1	-18.994	178.411				26.4		Kadavu	2010-08-10			Fiji							http://dx.doi.org/10.1098/rspb.2020.0045	SAMA
preservedSpecimen		MSAPB430_11_ACC001				Lasioglossum		Lasioglossum fijiense (Perkins and Cheesman, 1928)			1	-18.991	178.418				27		Kadavu	2010-08-10			Fiji							http://dx.doi.org/10.1098/rspb.2020.0045	SAMA
preservedSpecimen		MSAPB431_11_ACC002				Lasioglossum		Lasioglossum fijiense (Perkins and Cheesman, 1928)			1	-18.991	178.418				27		Kadavu	2010-08-10			Fiji							http://dx.doi.org/10.1098/rspb.2020.0045	SAMA
preservedSpecimen		MSAPB432_11_ACD015				Lasioglossum		Lasioglossum fijiense (Perkins and Cheesman, 1928)			1	-18.983	178.429				11.8		Kadavu	2010-08-10			Fiji							http://dx.doi.org/10.1098/rspb.2020.0045	SAMA
preservedSpecimen		MSAPB433_11_ACD016				Lasioglossum		Lasioglossum fijiense (Perkins and Cheesman, 1928)			1	-18.983	178.429				11.8		Kadavu	2010-08-10			Fiji							http://dx.doi.org/10.1098/rspb.2020.0045	SAMA
preservedSpecimen		MSAPB434_11_ACD001				Lasioglossum		Lasioglossum fijiense (Perkins and Cheesman, 1928)			1	-18.983	178.429				11.8		Kadavu	2010-08-10			Fiji							http://dx.doi.org/10.1098/rspb.2020.0045	SAMA
preservedSpecimen		MSAPB435_11_ACD002				Lasioglossum		Lasioglossum fijiense (Perkins and Cheesman, 1928)			1	-18.983	178.429				11.8		Kadavu	2010-08-10			Fiji							http://dx.doi.org/10.1098/rspb.2020.0045	SAMA
preservedSpecimen		MSAPB436_11_ACD003				Lasioglossum		Lasioglossum fijiense (Perkins and Cheesman, 1928)			1	-18.983	178.429				11.8		Kadavu	2010-08-10			Fiji							http://dx.doi.org/10.1098/rspb.2020.0045	SAMA
preservedSpecimen		MSAPB437_11_ACD004				Lasioglossum		Lasioglossum fijiense (Perkins and Cheesman, 1928)			1	-18.983	178.429				11.8		Kadavu	2010-08-10			Fiji							http://dx.doi.org/10.1098/rspb.2020.0045	SAMA
preservedSpecimen		MSAPB438_11_ACD005				Lasioglossum		Lasioglossum fijiense (Perkins and Cheesman, 1928)			1	-18.983	178.429				11.8		Kadavu	2010-08-10			Fiji							http://dx.doi.org/10.1098/rspb.2020.0045	SAMA
preservedSpecimen		MSAPB439_11_ACE001				Lasioglossum		Lasioglossum fijiense (Perkins and Cheesman, 1928)			1	-18.983	178.434				19.7		Kadavu	2010-08-10			Fiji							http://dx.doi.org/10.1098/rspb.2020.0045	SAMA
preservedSpecimen		MSAPB440_11_ACE002				Lasioglossum		Lasioglossum fijiense (Perkins and Cheesman, 1928)			1	-18.983	178.434				19.7		Kadavu	2010-08-10			Fiji							http://dx.doi.org/10.1098/rspb.2020.0045	SAMA
preservedSpecimen		MSAPB441_11_ACE003				Lasioglossum		Lasioglossum fijiense (Perkins and Cheesman, 1928)			1	-18.983	178.434				19.7		Kadavu	2010-08-10			Fiji							http://dx.doi.org/10.1098/rspb.2020.0045	SAMA
preservedSpecimen		MSAPB442_11_ACE004				Lasioglossum		Lasioglossum fijiense (Perkins and Cheesman, 1928)			1	-18.983	178.434				19.7		Kadavu	2010-08-10			Fiji							http://dx.doi.org/10.1098/rspb.2020.0045	SAMA
preservedSpecimen		MSAPB443_11_ACE005				Lasioglossum		Lasioglossum fijiense (Perkins and Cheesman, 1928)			1	-18.983	178.434				19.7		Kadavu	2010-08-10			Fiji							http://dx.doi.org/10.1098/rspb.2020.0045	SAMA
preservedSpecimen		MSAPB444_11_ACE006				Lasioglossum		Lasioglossum fijiense (Perkins and Cheesman, 1928)			1	-18.983	178.434				19.7		Kadavu	2010-08-10			Fiji							http://dx.doi.org/10.1098/rspb.2020.0045	SAMA
preservedSpecimen		MSAPB445_11_ACE007				Lasioglossum		Lasioglossum fijiense (Perkins and Cheesman, 1928)			1	-18.983	178.434				19.7		Kadavu	2010-08-10			Fiji							http://dx.doi.org/10.1098/rspb.2020.0045	SAMA
preservedSpecimen		MSAPB446_11_ACE008				Lasioglossum		Lasioglossum fijiense (Perkins and Cheesman, 1928)			1	-18.983	178.434				19.7		Kadavu	2010-08-10			Fiji							http://dx.doi.org/10.1098/rspb.2020.0045	SAMA
preservedSpecimen		MSAPB447_11_ACF001				Lasioglossum		Lasioglossum fijiense (Perkins and Cheesman, 1928)			1	-18.982	178.447				158.1		Kadavu	2010-08-10			Fiji							http://dx.doi.org/10.1098/rspb.2020.0045	SAMA
preservedSpecimen		MSAPB448_11_ACG001				Lasioglossum		Lasioglossum fijiense (Perkins and Cheesman, 1928)			1	-18.998	178.464				21.9		Kadavu	2010-08-10			Fiji							http://dx.doi.org/10.1098/rspb.2020.0045	SAMA
preservedSpecimen		MSAPB449_11_ACG002				Lasioglossum		Lasioglossum fijiense (Perkins and Cheesman, 1928)			1	-18.998	178.464				21.9		Kadavu	2010-08-10			Fiji							http://dx.doi.org/10.1098/rspb.2020.0045	SAMA
preservedSpecimen		MSAPB450_11_ACH001				Lasioglossum		Lasioglossum fijiense (Perkins and Cheesman, 1928)			1	-18.993	178.474				29.4		Kadavu	2010-08-10			Fiji							http://dx.doi.org/10.1098/rspb.2020.0045	SAMA
preservedSpecimen		MSAPB451_11_ACH002				Lasioglossum		Lasioglossum fijiense (Perkins and Cheesman, 1928)			1	-18.993	178.474				29.4		Kadavu	2010-08-10			Fiji							http://dx.doi.org/10.1098/rspb.2020.0045	SAMA
preservedSpecimen		MSAPB452_11_ACH003				Lasioglossum		Lasioglossum fijiense (Perkins and Cheesman, 1928)			1	-18.993	178.474				29.4		Kadavu	2010-08-10			Fiji							http://dx.doi.org/10.1098/rspb.2020.0045	SAMA
preservedSpecimen		MSAPB453_11_ACH004				Lasioglossum		Lasioglossum fijiense (Perkins and Cheesman, 1928)			1	-18.993	178.474				29.4		Kadavu	2010-08-10			Fiji							http://dx.doi.org/10.1098/rspb.2020.0045	SAMA
preservedSpecimen		MSAPB454_11_ACH005				Lasioglossum		Lasioglossum fijiense (Perkins and Cheesman, 1928)			1	-18.993	178.474				29.4		Kadavu	2010-08-10			Fiji							http://dx.doi.org/10.1098/rspb.2020.0045	SAMA
preservedSpecimen		MSAPB455_11_ACH006				Lasioglossum		Lasioglossum fijiense (Perkins and Cheesman, 1928)			1	-18.993	178.474				29.4		Kadavu	2010-08-10			Fiji							http://dx.doi.org/10.1098/rspb.2020.0045	SAMA
preservedSpecimen		MSAPB456_11_ACI002				Lasioglossum		Lasioglossum fijiense (Perkins and Cheesman, 1928)			1	-18.987	178.475				10.9		Kadavu	2010-08-11			Fiji							http://dx.doi.org/10.1098/rspb.2020.0045	SAMA
preservedSpecimen		MSAPB457_11_ACI003				Lasioglossum		Lasioglossum fijiense (Perkins and Cheesman, 1928)			1	-18.987	178.475				10.9		Kadavu	2010-08-11			Fiji							http://dx.doi.org/10.1098/rspb.2020.0045	SAMA
preservedSpecimen		MSAPB460_11_ACI006				Lasioglossum		Lasioglossum fijiense (Perkins and Cheesman, 1928)			1	-18.987	178.475				10.9		Kadavu	2010-08-11			Fiji							http://dx.doi.org/10.1098/rspb.2020.0045	SAMA
preservedSpecimen		MSAPB461_11_ACJ002				Lasioglossum		Lasioglossum fijiense (Perkins and Cheesman, 1928)			1	-18.97	178.428				18.2		Kadavu	2010-08-12			Fiji							http://dx.doi.org/10.1098/rspb.2020.0045	SAMA
preservedSpecimen		MSAPB462_11_ACJ003				Lasioglossum		Lasioglossum fijiense (Perkins and Cheesman, 1928)			1	-18.97	178.428				18.2		Kadavu	2010-08-12			Fiji							http://dx.doi.org/10.1098/rspb.2020.0045	SAMA
preservedSpecimen		MSAPB463_11_ACJ004				Lasioglossum		Lasioglossum fijiense (Perkins and Cheesman, 1928)			1	-18.97	178.428				18.2		Kadavu	2010-08-12			Fiji							http://dx.doi.org/10.1098/rspb.2020.0045	SAMA
preservedSpecimen		MSAPB464_11_ACK004				Lasioglossum		Lasioglossum fijiense (Perkins and Cheesman, 1928)			1	-16.78	179.33				14.4		Vanua_Levu	2010-08-13			Fiji							http://dx.doi.org/10.1098/rspb.2020.0045	SAMA
preservedSpecimen		MSAPB471_11_ACL001				Lasioglossum		Lasioglossum fijiense (Perkins and Cheesman, 1928)			1	-16.43	179.373				7		Vanua_Levu	2010-08-15			Fiji							http://dx.doi.org/10.1098/rspb.2020.0045	SAMA
preservedSpecimen		MSAPB472_11_ACL002				Lasioglossum		Lasioglossum fijiense (Perkins and Cheesman, 1928)			1	-16.43	179.373				7		Vanua_Levu	2010-08-15			Fiji							http://dx.doi.org/10.1098/rspb.2020.0045	SAMA
preservedSpecimen		MSAPB473_11_ACL003				Lasioglossum		Lasioglossum fijiense (Perkins and Cheesman, 1928)			1	-16.43	179.373				7		Vanua_Levu	2010-08-15			Fiji							http://dx.doi.org/10.1098/rspb.2020.0045	SAMA
preservedSpecimen		MSAPB474_11_ACL004				Lasioglossum		Lasioglossum fijiense (Perkins and Cheesman, 1928)			1	-16.43	179.373				7		Vanua_Levu	2010-08-15			Fiji							http://dx.doi.org/10.1098/rspb.2020.0045	SAMA
preservedSpecimen		MSAPB475_11_ACL005				Lasioglossum		Lasioglossum fijiense (Perkins and Cheesman, 1928)			1	-16.43	179.373				7		Vanua_Levu	2010-08-15			Fiji							http://dx.doi.org/10.1098/rspb.2020.0045	SAMA
preservedSpecimen		MSAPB999_12_ADM001				Lasioglossum		Lasioglossum fijiense (Perkins and Cheesman, 1928)			1	-19.1605	-178.411				7.8		Ogea	2011-07-10			Fiji							http://dx.doi.org/10.1098/rspb.2020.0045	SAMA
preservedSpecimen		TelA03				Lasioglossum		Lasioglossum atritergus (Dorey, Schwarz and Stevens, 2019)			1	-17.5739	177.988				1026.4		Viti_Levu	2017-04-28			Fiji							http://dx.doi.org/10.1098/rspb.2020.0045	SAMA
preservedSpecimen		TelA09				Lasioglossum		Lasioglossum Species H			1	-17.5817	177.935				1026.4		Viti_Levu	2017-04-28			Fiji							http://dx.doi.org/10.1098/rspb.2020.0045	SAMA
preservedSpecimen		TH_07				Lasioglossum		Lasioglossum Species N			1	-16.8361	-179.972				882.6		Taveuni	2017-04-28			Fiji							http://dx.doi.org/10.1098/rspb.2020.0045	SAMA
preservedSpecimen		TH_1				Lasioglossum		Lasioglossum fijiense (Perkins and Cheesman, 1928)			1	-16.8361	-179.972				882.6		Viti_Levu	2017-04-27			Fiji							http://dx.doi.org/10.1098/rspb.2020.0045	SAMA
preservedSpecimen		TH_5				Lasioglossum		Lasioglossum fijiense (Perkins and Cheesman, 1928)			1	-16.8361	-179.972				882.6		Viti_Levu	2017-04-27			Fiji							http://dx.doi.org/10.1098/rspb.2020.0045	SAMA
preservedSpecimen	FBA 063182	FJVL6b_N02_16		Colletidae	Hylaeus	Prosopisteron	albaeus	Hylaeus albaeus Dorey, Davies, and Parslow, 2024	Karl Magnacca	female	1	-18.1694	177.485						Sigatoka Sand Dunes N.P.; 1.1 km SSW of Volivoli Vlg.	2003-12-15		E Schlinger, M Tokotaʻa	Fiji			Malaise				https://doi.org/10.3389/fevo.2024.1339446	BPBM
preservedSpecimen	FBA 063181	FJVL6b_M02_16		Colletidae	Hylaeus	Prosopisteron	albaeus	Hylaeus albaeus Dorey, Davies, and Parslow, 2024	Karl Magnacca	female	1	-18.1694	177.485						Sigatoka Sand Dunes N.P., malaise 1.1 km SSW of Volivoli Vlg.	2003-12-15		E Schlinger, M Tokotaʻa	Fiji			Malaise				https://doi.org/10.3389/fevo.2024.1339446	BPBM
preservedSpecimen	FBA 063184	FJVL6b_M02_16		Colletidae	Hylaeus	Prosopisteron	albaeus	Hylaeus albaeus Dorey, Davies, and Parslow, 2024	Karl Magnacca	female	1	-18.1694	177.485						Sigatoka Sand Dunes N.P., malaise 1.1 km SSW of Volivoli Vlg.	2003-12-15		E Schlinger, M Tokotaʻa	Fiji			Malaise				https://doi.org/10.3389/fevo.2024.1339446	BPBM
preservedSpecimen	FBA 063195	FJVL6b_M02_16		Colletidae	Hylaeus	Prosopisteron	albaeus	Hylaeus albaeus Dorey, Davies, and Parslow, 2024	Karl Magnacca	female	1	-18.1694	177.485						Sigatoka Sand Dunes N.P., malaise 1.1 km SSW of Volivoli Vlg.	2003-12-15		E Schlinger, M Tokotaʻa	Fiji			Malaise				https://doi.org/10.3389/fevo.2024.1339446	BPBM
preservedSpecimen	FBA 064760	FJVL6b_M02_19		Colletidae	Hylaeus	Prosopisteron	albaeus	Hylaeus albaeus Dorey, Davies, and Parslow, 2024	Karl Magnacca	female	1	-18.1694	177.485						Sigatoka Sand Dunes N.P., malaise 1.1 km SSW of Volivoli Vlg.	2004-05-17		E Schlinger, M Tokotaʻa	Fiji			Malaise				https://doi.org/10.3389/fevo.2024.1339446	BPBM
preservedSpecimen	18008	CFJRR_NH9		Colletidae	Hylaeus	Prosopisteron	albaeus	Hylaeus albaeus Dorey, Davies, and Parslow, 2024	James B Dorey	male	1	-17.3603	178.154			20			Rakiraki hotel	2016-04-01	14:28:00	MP Schwarz	Fiji			Sweep net	Metrosideros collina var. collina			https://doi.org/10.3389/fevo.2024.1339446	SAMA		Holotype
preservedSpecimen				Colletidae	Hylaeus	Prosopisteron	albaeus	Hylaeus albaeus Dorey, Davies, and Parslow, 2024	Karl Magnacca	female	1	-17.8	177.7			20000			Nausori Highlands	1970/10/01	14:28:00	NLH Krauss	Fiji							https://doi.org/10.3389/fevo.2024.1339446	BPBM
preservedSpecimen				Colletidae	Hylaeus	Prosopisteron	albaeus	Hylaeus albaeus Dorey, Davies, and Parslow, 2024	Karl Magnacca	female	1	-17.8	177.7			20000			Nausori Highlands	1970/10/01	14:28:00	NLH Krauss	Fiji							https://doi.org/10.3389/fevo.2024.1339446	BPBM
preservedSpecimen	FBA 026755	FJ-6B Malaise		Colletidae	Hylaeus	Prosopisteron	albaeus	Hylaeus albaeus Dorey, Davies, and Parslow, 2024	Karl Magnacca	female	1	-18.16	177.5						Sigatoka Prov., Sigatoka Sand Dunes N.P.	2002/12/13	14:45:00	M Irwin, E Schlinger, M Tokotaʻa	Fiji			Malaise				https://doi.org/10.3389/fevo.2024.1339446	BPBM
preservedSpecimen	FBA 026760	FJ-6B Malaise		Colletidae	Hylaeus	Prosopisteron	albaeus	Hylaeus albaeus Dorey, Davies, and Parslow, 2024	Karl Magnacca	male	1	-18.16	177.5						Sigatoka Prov., Sigatoka Sand Dunes N.P.	2002/12/13	14:45:00	M Irwin, E Schlinger, M Tokotaʻa	Fiji			Malaise				https://doi.org/10.3389/fevo.2024.1339446	BPBM
preservedSpecimen	FBA 035880	FJ-6C Malaise		Colletidae	Hylaeus	Prosopisteron	albaeus	Hylaeus albaeus Dorey, Davies, and Parslow, 2024	Karl Magnacca	female	1	-18.16	177.5						Sigatoka Sand Dunes N.P.	2003/12/13	14:45:00	M Irwin, E Schlinger, M Tokotaʻa	Fiji			Malaise				https://doi.org/10.3389/fevo.2024.1339446	BPBM
preservedSpecimen	FBA 035899	FJ-6C Malaise		Colletidae	Hylaeus	Prosopisteron	albaeus	Hylaeus albaeus Dorey, Davies, and Parslow, 2024	Karl Magnacca	male	1	-18.16	177.5						Sigatoka Sand Dunes N.P.	2003/12/13	14:45:00	M Irwin, E Schlinger, M Tokotaʻa	Fiji			Malaise				https://doi.org/10.3389/fevo.2024.1339446	BPBM
preservedSpecimen	SAMA 32-035985	GA19MCE76		Colletidae	Hylaeus	Prosopisteron	apertus	Hylaeus apertus Dorey, Davies, and Parslow, 2024	James B Dorey	female	1	-16.8362	-179.973			10	872		Taveuni - Des Voeux track	2019/04/29		JBDorey	Fiji	JBDorey noticed little red flowers at the top of a high tree and began sweeping with the long net. Tree was about 10-15 m tall and likely a Myrtaceae. After first sweep noticed some colletids, likely Hylaeus sp. And we continued sweeping for a while catching colletids and Homalictus. There were many plants near this tree that we did not find bees on, including Stachytarpheta urticifolia, Polygala…		General sweep	Metrosideros collina var. collina			https://doi.org/10.3389/fevo.2024.1339446	SAMA
preservedSpecimen	SAMA 32-035986	GA19MCE77		Colletidae	Hylaeus	Prosopisteron	apertus	Hylaeus apertus Dorey, Davies, and Parslow, 2024	James B Dorey	female	1	-16.8362	-179.973			10	872		Taveuni - Des Voeux track	2019/04/29		JBDorey	Fiji	JBDorey noticed little red flowers at the top of a high tree and began sweeping with the long net. Tree was about 10-15 m tall and likely a Myrtaceae. After first sweep noticed some colletids, likely Hylaeus sp. And we continued sweeping for a while catching colletids and Homalictus. There were many plants near this tree that we did not find bees on, including Stachytarpheta urticifolia, Polygala…		General sweep	Metrosideros collina var. collina			https://doi.org/10.3389/fevo.2024.1339446	SAMA
preservedSpecimen	SAMA 32-035987	GA19MCE77		Colletidae	Hylaeus	Prosopisteron	apertus	Hylaeus apertus Dorey, Davies, and Parslow, 2024	James B Dorey	female	1	-16.8362	-179.973			10	872		Taveuni - Des Voeux track	2019/04/29		JBDorey	Fiji	JBDorey noticed little red flowers at the top of a high tree and began sweeping with the long net. Tree was about 10-15 m tall and likely a Myrtaceae. After first sweep noticed some colletids, likely Hylaeus sp. And we continued sweeping for a while catching colletids and Homalictus. There were many plants near this tree that we did not find bees on, including Stachytarpheta urticifolia, Polygala…		General sweep	Metrosideros collina var. collina			https://doi.org/10.3389/fevo.2024.1339446	SAMA
preservedSpecimen	SAMA 32-035988	GA19MCE78		Colletidae	Hylaeus	Prosopisteron	apertus	Hylaeus apertus Dorey, Davies, and Parslow, 2024	James B Dorey	female	1	-16.8362	-179.973			10	872		Taveuni - Des Voeux track	2019/04/29		JBDorey	Fiji	JBDorey noticed little red flowers at the top of a high tree and began sweeping with the long net. Tree was about 10-15 m tall and likely a Myrtaceae. After first sweep noticed some colletids, likely Hylaeus sp. And we continued sweeping for a while catching colletids and Homalictus. There were many plants near this tree that we did not find bees on, including Stachytarpheta urticifolia, Polygala…		General sweep	Metrosideros collina var. collina			https://doi.org/10.3389/fevo.2024.1339446	SAMA
preservedSpecimen	SAMA 32-035989	GA19MCE81		Colletidae	Hylaeus	Prosopisteron	apertus	Hylaeus apertus Dorey, Davies, and Parslow, 2024	James B Dorey	female	1	-16.8362	-179.973			10	872		Taveuni - Des Voeux track	2019/04/29	15:35:00	JBDorey	Fiji	JBDorey noticed little red flowers at the top of a high tree and began sweeping with the long net. Tree was about 10-15 m tall and likely a Myrtaceae. After first sweep noticed some colletids, likely Hylaeus sp. And we continued sweeping for a while catching colletids and Homalictus. There were many plants near this tree that we did not find bees on, including Stachytarpheta urticifolia, Polygala…		General sweep	Metrosideros collina var. collina			https://doi.org/10.3389/fevo.2024.1339446	SAMA
preservedSpecimen	SAMA 32-035990	GA19MCE76		Colletidae	Hylaeus	Prosopisteron	apertus	Hylaeus apertus Dorey, Davies, and Parslow, 2024	James B Dorey	female	1	-16.8362	-179.973			10	872		Taveuni - Des Veoux track	2019/04/29		JBDorey	Fiji	JBDorey noticed little red flowers at the top of a high tree and began sweeping with the long net. Tree was about 10-15 m tall and likely a Myrtaceae. After first sweep noticed some colletids, likely Hylaeus sp. And we continued sweeping for a while catching colletids and Homalictus. There were many plants near this tree that we did not find bees on, including Stachytarpheta urticifolia, Polygala…		General sweep	Metrosideros collina var. collina			https://doi.org/10.3389/fevo.2024.1339446	SAMA
preservedSpecimen		GA19MCE77		Colletidae	Hylaeus	Prosopisteron	apertus	Hylaeus apertus Dorey, Davies, and Parslow, 2024	James B Dorey	female	1	-16.8362	-179.973			10	872		Taveuni - Des Veoux track	2019/04/29		JBDorey	Fiji	JBDorey noticed little red flowers at the top of a high tree and began sweeping with the long net. Tree was about 10-15 m tall and likely a Myrtaceae. After first sweep noticed some colletids, likely Hylaeus sp. And we continued sweeping for a while catching colletids and Homalictus. There were many plants near this tree that we did not find bees on, including Stachytarpheta urticifolia, Polygala…		General sweep	Metrosideros collina var. collina			https://doi.org/10.3389/fevo.2024.1339446	SAMA
preservedSpecimen		GA19MCE77		Colletidae	Hylaeus	Prosopisteron	apertus	Hylaeus apertus Dorey, Davies, and Parslow, 2024	James B Dorey	female	1	-16.8362	-179.973			10	872		Taveuni - Des Veoux track	2019/04/29		JBDorey	Fiji	JBDorey noticed little red flowers at the top of a high tree and began sweeping with the long net. Tree was about 10-15 m tall and likely a Myrtaceae. After first sweep noticed some colletids, likely Hylaeus sp. And we continued sweeping for a while catching colletids and Homalictus. There were many plants near this tree that we did not find bees on, including Stachytarpheta urticifolia, Polygala…		General sweep	Metrosideros collina var. collina			https://doi.org/10.3389/fevo.2024.1339446	SAMA
preservedSpecimen		GA19MCE78		Colletidae	Hylaeus	Prosopisteron	apertus	Hylaeus apertus Dorey, Davies, and Parslow, 2024	James B Dorey	female	1	-16.8362	-179.973			10	872		Taveuni - Des Veoux track	2019/04/29		JBDorey	Fiji	JBDorey noticed little red flowers at the top of a high tree and began sweeping with the long net. Tree was about 10-15 m tall and likely a Myrtaceae. After first sweep noticed some colletids, likely Hylaeus sp. And we continued sweeping for a while catching colletids and Homalictus. There were many plants near this tree that we did not find bees on, including Stachytarpheta urticifolia, Polygala…		General sweep	Metrosideros collina var. collina			https://doi.org/10.3389/fevo.2024.1339446	SAMA
preservedSpecimen		GA19MCE79		Colletidae	Hylaeus	Prosopisteron	apertus	Hylaeus apertus Dorey, Davies, and Parslow, 2024	James B Dorey	female	1	-16.8362	-179.973			10	872		Taveuni - Des Veoux track	2019/04/29		MIStevens, MCElmer	Fiji	JBDorey noticed little red flowers at the top of a high tree and began sweeping with the long net. Tree was about 10-15 m tall and likely a Myrtaceae. After first sweep noticed some colletids, likely Hylaeus sp. And we continued sweeping for a while catching colletids and Homalictus. There were many plants near this tree that we did not find bees on, including Stachytarpheta urticifolia, Polygala…		General sweep	Metrosideros collina var. collina			https://doi.org/10.3389/fevo.2024.1339446	SAMA
preservedSpecimen		GA19MCE80		Colletidae	Hylaeus	Prosopisteron	apertus	Hylaeus apertus Dorey, Davies, and Parslow, 2024	James B Dorey	female	1	-16.8362	-179.973			10	872		Taveuni - Des Veoux track	2019/04/29		JBDorey	Fiji	JBDorey noticed little red flowers at the top of a high tree and began sweeping with the long net. Tree was about 10-15 m tall and likely a Myrtaceae. After first sweep noticed some colletids, likely Hylaeus sp. And we continued sweeping for a while catching colletids and Homalictus. There were many plants near this tree that we did not find bees on, including Stachytarpheta urticifolia, Polygala…		General sweep	Metrosideros collina var. collina			https://doi.org/10.3389/fevo.2024.1339446	SAMA
preservedSpecimen		GA19MCE81		Colletidae	Hylaeus	Prosopisteron	apertus	Hylaeus apertus Dorey, Davies, and Parslow, 2024	James B Dorey	female	1	-16.8362	-179.973			10	872		Taveuni - Des Veoux track	2019/04/29		JBDorey	Fiji	JBDorey noticed little red flowers at the top of a high tree and began sweeping with the long net. Tree was about 10-15 m tall and likely a Myrtaceae. After first sweep noticed some colletids, likely Hylaeus sp. And we continued sweeping for a while catching colletids and Homalictus. There were many plants near this tree that we did not find bees on, including Stachytarpheta urticifolia, Polygala…		General sweep	Metrosideros collina var. collina			https://doi.org/10.3389/fevo.2024.1339446	SAMA
preservedSpecimen		GA19MCE81		Colletidae	Hylaeus	Prosopisteron	apertus	Hylaeus apertus Dorey, Davies, and Parslow, 2024	James B Dorey	female	1	-16.8362	-179.973			10	872		Taveuni - Des Veoux track	2019/04/29		JBDorey	Fiji	JBDorey noticed little red flowers at the top of a high tree and began sweeping with the long net. Tree was about 10-15 m tall and likely a Myrtaceae. After first sweep noticed some colletids, likely Hylaeus sp. And we continued sweeping for a while catching colletids and Homalictus. There were many plants near this tree that we did not find bees on, including Stachytarpheta urticifolia, Polygala…		General sweep	Metrosideros collina var. collina			https://doi.org/10.3389/fevo.2024.1339446	SAMA
preservedSpecimen	18009	GA19MCE76		Colletidae	Hylaeus	Prosopisteron	apertus	Hylaeus apertus Dorey, Davies, and Parslow, 2024	James B Dorey	male	1	-16.8362	-179.973			10	872		Taveuni - Des Voeux track	2019/04/29		JBDorey	Fiji	JBDorey noticed little red flowers at the top of a high tree and began sweeping with the long net. Tree was about 10-15 m tall and likely a Myrtaceae. After first sweep noticed some colletids, likely Hylaeus sp. And we continued sweeping for a while catching colletids and Homalictus. There were many plants near this tree that we did not find bees on, including Stachytarpheta urticifolia, Polygala…		General sweep	Metrosideros collina var. collina			https://doi.org/10.3389/fevo.2024.1339446	SAMA		Holotype
preservedSpecimen	SAMA 32-035991	GA19MCE77		Colletidae	Hylaeus	Prosopisteron	apertus	Hylaeus apertus Dorey, Davies, and Parslow, 2024	James B Dorey	male	1	-16.8362	-179.973			10	872		Taveuni - Des Voeux track	2019/04/29		JBDorey	Fiji	JBDorey noticed little red flowers at the top of a high tree and began sweeping with the long net. Tree was about 10-15 m tall and likely a Myrtaceae. After first sweep noticed some colletids, likely Hylaeus sp. And we continued sweeping for a while catching colletids and Homalictus. There were many plants near this tree that we did not find bees on, including Stachytarpheta urticifolia, Polygala…		General sweep	Metrosideros collina var. collina			https://doi.org/10.3389/fevo.2024.1339446	SAMA
preservedSpecimen	SAMA 32-035992	GA19MCE77		Colletidae	Hylaeus	Prosopisteron	apertus	Hylaeus apertus Dorey, Davies, and Parslow, 2024	James B Dorey	male	1	-16.8362	-179.973			10	872		Taveuni - Des Voeux track	2019/04/29		JBDorey	Fiji	JBDorey noticed little red flowers at the top of a high tree and began sweeping with the long net. Tree was about 10-15 m tall and likely a Myrtaceae. After first sweep noticed some colletids, likely Hylaeus sp. And we continued sweeping for a while catching colletids and Homalictus. There were many plants near this tree that we did not find bees on, including Stachytarpheta urticifolia, Polygala…		General sweep	Metrosideros collina var. collina			https://doi.org/10.3389/fevo.2024.1339446	SAMA
preservedSpecimen	SAMA 32-035993	GA19MCE78		Colletidae	Hylaeus	Prosopisteron	apertus	Hylaeus apertus Dorey, Davies, and Parslow, 2024	James B Dorey	male	1	-16.8362	-179.973			10	872		Taveuni - Des Voeux track	2019/04/29		JBDorey	Fiji	JBDorey noticed little red flowers at the top of a high tree and began sweeping with the long net. Tree was about 10-15 m tall and likely a Myrtaceae. After first sweep noticed some colletids, likely Hylaeus sp. And we continued sweeping for a while catching colletids and Homalictus. There were many plants near this tree that we did not find bees on, including Stachytarpheta urticifolia, Polygala…		General sweep	Metrosideros collina var. collina			https://doi.org/10.3389/fevo.2024.1339446	SAMA
preservedSpecimen	SAMA 32-035994	GA19MCE79		Colletidae	Hylaeus	Prosopisteron	apertus	Hylaeus apertus Dorey, Davies, and Parslow, 2024	James B Dorey	male	1	-16.8362	-179.973			10	872		Taveuni - Des Voeux track	2019/04/29		MIStevens, MCElmer	Fiji	JBDorey noticed little red flowers at the top of a high tree and began sweeping with the long net. Tree was about 10-15 m tall and likely a Myrtaceae. After first sweep noticed some colletids, likely Hylaeus sp. And we continued sweeping for a while catching colletids and Homalictus. There were many plants near this tree that we did not find bees on, including Stachytarpheta urticifolia, Polygala…		General sweep	Metrosideros collina var. collina			https://doi.org/10.3389/fevo.2024.1339446	SAMA
preservedSpecimen		GA19MCE77		Colletidae	Hylaeus	Prosopisteron	apertus	Hylaeus apertus Dorey, Davies, and Parslow, 2024	James B Dorey	male	1	-16.8362	-179.973			10	872		Taveuni - Des Veoux track	2019/04/29		JBDorey	Fiji	JBDorey noticed little red flowers at the top of a high tree and began sweeping with the long net. Tree was about 10-15 m tall and likely a Myrtaceae. After first sweep noticed some colletids, likely Hylaeus sp. And we continued sweeping for a while catching colletids and Homalictus. There were many plants near this tree that we did not find bees on, including Stachytarpheta urticifolia, Polygala…		General sweep	Metrosideros collina var. collina			https://doi.org/10.3389/fevo.2024.1339446	SAMA
preservedSpecimen		GA19MCE77		Colletidae	Hylaeus	Prosopisteron	apertus	Hylaeus apertus Dorey, Davies, and Parslow, 2024	James B Dorey	male	1	-16.8362	-179.973			10	872		Taveuni - Des Veoux track	2019/04/29		JBDorey	Fiji	JBDorey noticed little red flowers at the top of a high tree and began sweeping with the long net. Tree was about 10-15 m tall and likely a Myrtaceae. After first sweep noticed some colletids, likely Hylaeus sp. And we continued sweeping for a while catching colletids and Homalictus. There were many plants near this tree that we did not find bees on, including Stachytarpheta urticifolia, Polygala…		General sweep	Metrosideros collina var. collina			https://doi.org/10.3389/fevo.2024.1339446	SAMA
preservedSpecimen		GA19MCE79		Colletidae	Hylaeus	Prosopisteron	apertus	Hylaeus apertus Dorey, Davies, and Parslow, 2024	James B Dorey	male	1	-16.8362	-179.973			10	872		Taveuni - Des Veoux track	2019/04/29	13:37:00	MIStevens, MCElmer	Fiji	JBDorey noticed little red flowers at the top of a high tree and began sweeping with the long net. Tree was about 10-15 m tall and likely a Myrtaceae. After first sweep noticed some colletids, likely Hylaeus sp. And we continued sweeping for a while catching colletids and Homalictus. There were many plants near this tree that we did not find bees on, including Stachytarpheta urticifolia, Polygala…		General sweep	Metrosideros collina var. collina			https://doi.org/10.3389/fevo.2024.1339446	SAMA
preservedSpecimen		GA19MCE80		Colletidae	Hylaeus	Prosopisteron	apertus	Hylaeus apertus Dorey, Davies, and Parslow, 2024	James B Dorey	male	1	-16.8362	-179.973			10	872		Taveuni - Des Veoux track	2019/04/29	13:42:00	JBDorey	Fiji	JBDorey noticed little red flowers at the top of a high tree and began sweeping with the long net. Tree was about 10-15 m tall and likely a Myrtaceae. After first sweep noticed some colletids, likely Hylaeus sp. And we continued sweeping for a while catching colletids and Homalictus. There were many plants near this tree that we did not find bees on, including Stachytarpheta urticifolia, Polygala…		General sweep	Metrosideros collina var. collina			https://doi.org/10.3389/fevo.2024.1339446	SAMA
preservedSpecimen	1983.25			Colletidae	Hylaeus	Prosopisteron	aureaviridis	Hylaeus aureaviridis Dorey, Magnacca, and Parslow, 2024	Karl Magnacca	female	1	-17.6	-149.5			2000			Fare Ata, Aorai Trail	1977/03/09	13:42:00	WC Gagne	French Polynesia							https://doi.org/10.3389/fevo.2024.1339446	BPBM
preservedSpecimen	1983.25			Colletidae	Hylaeus	Prosopisteron	aureaviridis	Hylaeus aureaviridis Dorey, Magnacca, and Parslow, 2024	Karl Magnacca	male	1	-17.6	-149.5			2000			Fare Ata, Aorai Trail	1977/03/09		WC Gagne	French Polynesia							https://doi.org/10.3389/fevo.2024.1339446	BPBM
preservedSpecimen	1983.25			Colletidae	Hylaeus	Prosopisteron	aureaviridis	Hylaeus aureaviridis Dorey, Magnacca, and Parslow, 2024	Karl Magnacca	female	1	-17.6	-149.5						Mt. Marau	1977/06/29		PD Ashlock	French Polynesia				Weinmannia			https://doi.org/10.3389/fevo.2024.1339446	BPBM
preservedSpecimen	1985.69			Colletidae	Hylaeus	Prosopisteron	aureaviridis	Hylaeus aureaviridis Dorey, Magnacca, and Parslow, 2024	Karl Magnacca	female	1	-17.6	-149.5						Mt. Marau	1984/08/28		G Paulay	French Polynesia							https://doi.org/10.3389/fevo.2024.1339446	BPBM
preservedSpecimen		PFnG9Gf		Colletidae	Hylaeus	Prosopisteron	aureaviridis	Hylaeus aureaviridis Dorey, Magnacca, and Parslow, 2024	James B Dorey	female	1	-17.609	-149.533			10	1409 m		Tahiti, Near the summit of the Mt Marau	2017/08/27		T Ramage	French Polynesia	Visiting the flowers of an introduced Solanum (Solanum nigrum or close species), and one specimen in a yellow pan trap I set for the few hours I spent there this day, very close to the Solanum specimens.		Sweep net	Solanum nigrum			https://doi.org/10.3389/fevo.2024.1339446	SAMA
preservedSpecimen	18010	PFnG9Gm		Colletidae	Hylaeus	Prosopisteron	aureaviridis	Hylaeus aureaviridis Dorey, Magnacca, and Parslow, 2024	James B Dorey	male	1	-17.609	-149.533			10	1409 m		Tahiti, Near the summit of the Mt Marau	2017/08/27		T Ramage	French Polynesia	Visiting the flowers of an introduced Solanum (Solanum nigrum or close species), and one specimen in a yellow pan trap I set for the few hours I spent there this day, very close to the Solanum specimens.		Sweep net	Solanum nigrum			https://doi.org/10.3389/fevo.2024.1339446	SAMA		Holotype
preservedSpecimen	18011			Colletidae	Hylaeus	Prosopisteron	breviflavus	Hylaeus breviflavus Magnacca, 2024	Karl Magnacca	male	1	-17.8	177.7			20000			Nausori Highlands	1970/10/01		NLH Krauss	Fiji							https://doi.org/10.3389/fevo.2024.1339446	BPBM
preservedSpecimen	SAMA 32-38373	FSM_AI006		Colletidae	Hylaeus	Euprosopoides	chuukensis	Hylaeus chuukensis Dorey, Davies, and Parslow, 2024	Olivia K. Davies and James B Dorey	female	1	7.362	151.923			20			Chuuk, Fono Mu Islet	2014-04-14		SVC Groom	Micronesia			Sweep net				https://doi.org/10.3389/fevo.2024.1339446	SAMA
preservedSpecimen	18007	FSM_AI003		Colletidae	Hylaeus	Euprosopoides	chuukensis	Hylaeus chuukensis Dorey, Davies, and Parslow, 2024	Olivia K. Davies and James B Dorey	male	1	7.447	151.887			20			Chuuk, Weno, Xavier College Campus	2014-04-14		SVC Groom	Micronesia			Sweep net				https://doi.org/10.3389/fevo.2024.1339446	SAMA		Holotype
preservedSpecimen	SAMA 32-38374	FSM_AI008		Colletidae	Hylaeus	Euprosopoides	chuukensis	Hylaeus chuukensis Dorey, Davies, and Parslow, 2024	Olivia K. Davies and James B Dorey	male	1	7.362	151.923			20			Chuuk, Fono Mu Islet	2014-04-14		SVC Groom	Micronesia			Sweep net				https://doi.org/10.3389/fevo.2024.1339446	SAMA
preservedSpecimen	SAMA 32-035995	19JDFJ1		Colletidae	Hylaeus	Prosopisteron	derectus	Hylaeus derectus Dorey, Davies, and Parslow, 2024	James B Dorey	female	1	-17.5682	177.953			10			Near Nadarivatu	2019/10/14		JB Dorey	Fiji	Swept off mistletoe sp. - severl other of these in broad area, but not terribly common or large plants. Ones side of road is forest while tho ther is cleared pasture land. Sunny/overcast and warm		Sweep net	Mistletoe sp. - Decaisnina forsteriana?			https://doi.org/10.3389/fevo.2024.1339446	SAMA
preservedSpecimen	SAMA 32-035996	19JDFJ1		Colletidae	Hylaeus	Prosopisteron	derectus	Hylaeus derectus Dorey, Davies, and Parslow, 2024	James B Dorey	female	1	-17.5682	177.953			10			Near Nadarivatu	2019/10/14		JB Dorey	Fiji	Swept off mistletoe sp. - severl other of these in broad area, but not terribly common or large plants. Ones side of road is forest while tho ther is cleared pasture land. Sunny/overcast and warm		Sweep net	Mistletoe sp. - Decaisnina forsteriana?			https://doi.org/10.3389/fevo.2024.1339446	SAMA
preservedSpecimen	SAMA 32-035997	19JDFJ1		Colletidae	Hylaeus	Prosopisteron	derectus	Hylaeus derectus Dorey, Davies, and Parslow, 2024	James B Dorey	male	1	-17.5682	177.953			10			Near Nadarivatu	2019/10/14		JB Dorey	Fiji	Swept off mistletoe sp. - severl other of these in broad area, but not terribly common or large plants. Ones side of road is forest while tho ther is cleared pasture land. Sunny/overcast and warm		Sweep net	Mistletoe sp. - Decaisnina forsteriana?			https://doi.org/10.3389/fevo.2024.1339446	SAMA
preservedSpecimen		19JDFJ5		Colletidae	Hylaeus	Prosopisteron	derectus	Hylaeus derectus Dorey, Davies, and Parslow, 2024	James B Dorey	female	1	-17.5682	177.953			10			Near Nadarivatu	2019/10/18		JB Dorey	Fiji	Swept off mistletoe sp. - several other of these in broad area, but not terribly common or large plants. Ones side of road is forest while tho ther is cleared pasture land. Mostly overcast, became active with small bit of sunlight, +2ii		Sweep net	Mistletoe sp. - Decaisnina forsteriana?			https://doi.org/10.3389/fevo.2024.1339446	SAMA
preservedSpecimen		19JDFJ5		Colletidae	Hylaeus	Prosopisteron	derectus	Hylaeus derectus Dorey, Davies, and Parslow, 2024	James B Dorey	female	1	-17.5682	177.953			10			Near Nadarivatu	2019/10/18		JB Dorey	Fiji	Swept off mistletoe sp. - several other of these in broad area, but not terribly common or large plants. Ones side of road is forest while tho ther is cleared pasture land. Mostly overcast, became active with small bit of sunlight, +2ii		Sweep net	Mistletoe sp. - Decaisnina forsteriana?			https://doi.org/10.3389/fevo.2024.1339446	SAMA
preservedSpecimen		19JDFJ5		Colletidae	Hylaeus	Prosopisteron	derectus	Hylaeus derectus Dorey, Davies, and Parslow, 2024	James B Dorey	female	1	-17.5682	177.953			10			Near Nadarivatu	2019/10/18		JB Dorey	Fiji	Swept off mistletoe sp. - several other of these in broad area, but not terribly common or large plants. Ones side of road is forest while tho ther is cleared pasture land. Mostly overcast, became active with small bit of sunlight, +2ii		Sweep net	Mistletoe sp. - Decaisnina forsteriana?			https://doi.org/10.3389/fevo.2024.1339446	SAMA
preservedSpecimen		19JDFJ4		Colletidae	Hylaeus	Prosopisteron	derectus	Hylaeus derectus Dorey, Davies, and Parslow, 2024	James B Dorey	male	1	-17.5682	177.953			10			Near Nadarivatu	2019/10/18		JB Dorey	Fiji	Swept off mistletoe sp. - several other of these in broad area, but not terribly common or large plants. Ones side of road is forest while tho ther is cleared pasture land. Mostly overcast, became active with small bit of sunlight, +2ii		Sweep net	Mistletoe sp. - Decaisnina forsteriana?			https://doi.org/10.3389/fevo.2024.1339446	SAMA
preservedSpecimen	18012	DE18		Colletidae	Hylaeus	Prosopisteron	derectus	Hylaeus derectus Dorey, Davies, and Parslow, 2024	James B Dorey	male	1	-17.568	177.953			10			Near Nadarivatu	2019/10/19		JB Dorey	Fiji			Sweep net				https://doi.org/10.3389/fevo.2024.1339446	SAMA		Holotype
preservedSpecimen	FBA 134592	Malaise 3		Colletidae	Hylaeus	Prosopisteron	navai	Hylaeus navai Dorey, Davies, and Parslow, 2024	Karl Magnacca	female	1	-16.841	-179.968						Cakaudrove Prov., 5.3 km SE Tavuki Vlg. Mt. Devo	2002/11/17		Schlinger, M Tokotaʻa	Fiji			Malaise				https://doi.org/10.3389/fevo.2024.1339446	BPBM
preservedSpecimen	FBA 099896	Malaise 1		Colletidae	Hylaeus	Prosopisteron	navai	Hylaeus navai Dorey, Davies, and Parslow, 2024	Karl Magnacca	female	1	-16.833	-180						Cakaudrove Prov., Soqulu House in Soqulu Estate	2002/11/21		EI Schlinger	Fiji			Malaise				https://doi.org/10.3389/fevo.2024.1339446	BPBM
preservedSpecimen	FBA 029757	FJ-11A Malaise		Colletidae	Hylaeus	Prosopisteron	navai	Hylaeus navai Dorey, Davies, and Parslow, 2024	Karl Magnacca	female	1	-17.616	177.983						Naitasiri Prov., Navai Village	2003/07/15		M Irwin, E Schlinger, M Tokotaʻa	Fiji			Malaise				https://doi.org/10.3389/fevo.2024.1339446	BPBM
preservedSpecimen	18013	19JDFJ7i		Colletidae	Hylaeus	Prosopisteron	navai	Hylaeus navai Dorey, Davies, and Parslow, 2024	James B Dorey	female	1	-17.5682	177.953			10			Near Nadarivatu	2019/10/18		JB Dorey	Fiji	Swept off mistletoe sp. - severl other of these in broad area, but not terribly common or large plants. Ones side of road is forest while tho ther is cleared pasture land.		Sweep net	Mistletoe sp. - Decaisnina forsteriana?			https://doi.org/10.3389/fevo.2024.1339446	SAMA		Holotype
preservedSpecimen		DE146		Colletidae	Hylaeus	Prosopisteron	navai	Hylaeus navai Dorey, Davies, and Parslow, 2024	James B Dorey	female	1	-17.576	177.935			10			Nadarivatu tel towers	2019/10/19		JB Dorey	Fiji	Notes from memory (Dec. 2021). Sight-swept from the mistletoe, Decaisnina forsteriana, on top of the mountiain. The plant was on the edge of the cleared area and the forest at the top. It was partly sunny and cloudy, and also breezy. There were not many bees present. However, the area had a reasonable amount of flowering plants active, and two Malaise traps that did not collect any Hylaeus						https://doi.org/10.3389/fevo.2024.1339446	SAMA
preservedSpecimen	SAMA 32-035998	DE149		Colletidae	Hylaeus	Prosopisteron	navai	Hylaeus navai Dorey, Davies, and Parslow, 2024	James B Dorey	female	1	-17.5762	177.935			10			Nadarivatu tel towers	2019/10/19		JB Dorey	Fiji	Notes from memory (Dec. 2021). Sight-swept from the mistletoe, Decaisnina forsteriana, on top of the mountiain. The plant was on the edge of the cleared area and the forest at the top. It was partly sunny and cloudy, and also breezy. There were not many bees present. However, the area had a reasonable amount of flowering plants active, and two Malaise traps that did not collect any Hylaeus		Sweep net				https://doi.org/10.3389/fevo.2024.1339446	SAMA
preservedSpecimen				Colletidae	Hylaeus	Prosopisteron	tuamotuensis	Hylaeus tuamotuensis Michener, 1965		male	1	-17.3	-145.5			10000			Tukuhora	1934-05-13		EC Zimmerman	French Polynesia							https://doi.org/10.3389/fevo.2024.1339446	BPBM		Holotype
preservedSpecimen				Colletidae	Hylaeus	Prosopisteron	tuamotuensis	Hylaeus tuamotuensis Michener, 1965		female	1	-18.1	-140.9			10000			Boring Bay	1934-05-19		EC Zimmerman	French Polynesia							https://doi.org/10.3389/fevo.2024.1339446	BPBM
preservedSpecimen				Colletidae	Hylaeus	Prosopisteron	tuamotuensis	Hylaeus tuamotuensis Michener, 1965	R.R. Snelling 1997	male	1	-14.47	-145.04			5000			Teavaroa to Opakari	1984-06-29		G.A. Samuelson	French Polynesia				mostly on Euphorbia atoto			https://doi.org/10.3389/fevo.2024.1339446	BPBM
preservedSpecimen				Colletidae	Hylaeus	Prosopisteron	tuamotuensis	Hylaeus tuamotuensis Michener, 1965	R.R. Snelling 1997	male	1	-14.47	-145.04			5000			Teavaroa to Opakari	1984-06-29		G.A. Samuelson	French Polynesia				mostly on Euphorbia atoto			https://doi.org/10.3389/fevo.2024.1339446	BPBM
preservedSpecimen				Colletidae	Hylaeus	Prosopisteron	tuamotuensis	Hylaeus tuamotuensis Michener, 1965	R.R. Snelling 1997	male	1	-14.47	-145.04			5000			Teavaroa to Opakari	1984-06-29		G.A. Samuelson	French Polynesia				mostly on Euphorbia atoto			https://doi.org/10.3389/fevo.2024.1339446	BPBM
preservedSpecimen				Colletidae	Hylaeus	Prosopisteron	tuamotuensis	Hylaeus tuamotuensis Michener, 1965	R.R. Snelling 1997	male	1	-14.47	-145.04			5000			Teavaroa to Opakari	1984-06-29		G.A. Samuelson	French Polynesia				mostly on Euphorbia atoto			https://doi.org/10.3389/fevo.2024.1339446	BPBM
preservedSpecimen				Colletidae	Hylaeus	Prosopisteron	tuamotuensis	Hylaeus tuamotuensis Michener, 1965	R.R. Snelling 1997	male	1	-14.47	-145.04			5000			Teavaroa to Opakari	1984-06-29		G.A. Samuelson	French Polynesia				mostly on Euphorbia atoto			https://doi.org/10.3389/fevo.2024.1339446	BPBM
preservedSpecimen				Colletidae	Hylaeus	Prosopisteron	tuamotuensis	Hylaeus tuamotuensis Michener, 1965	R.R. Snelling 1997	male	1	-14.47	-145.04			5000			Teavaroa to Opakari	1984-06-29		G.A. Samuelson	French Polynesia				mostly on Euphorbia atoto			https://doi.org/10.3389/fevo.2024.1339446	BPBM
preservedSpecimen				Colletidae	Hylaeus	Prosopisteron	tuamotuensis	Hylaeus tuamotuensis Michener, 1965	R.R. Snelling 1997	male	1	-14.47	-145.04			5000			Teavaroa to Opakari	1984-06-29		G.A. Samuelson	French Polynesia				mostly on Euphorbia atoto			https://doi.org/10.3389/fevo.2024.1339446	BPBM
preservedSpecimen				Colletidae	Hylaeus	Prosopisteron	tuamotuensis	Hylaeus tuamotuensis Michener, 1965	R.R. Snelling 1997	male	1	-14.47	-145.04			5000			Teavaroa to Opakari	1984-06-29		G.A. Samuelson	French Polynesia				mostly on Euphorbia atoto			https://doi.org/10.3389/fevo.2024.1339446	BPBM
preservedSpecimen				Colletidae	Hylaeus	Prosopisteron	tuamotuensis	Hylaeus tuamotuensis Michener, 1965	R.R. Snelling 1997	male	1	-14.47	-145.04			5000			Teavaroa to Opakari	1984-06-29		G.A. Samuelson	French Polynesia				mostly on Euphorbia atoto			https://doi.org/10.3389/fevo.2024.1339446	BPBM
preservedSpecimen				Colletidae	Hylaeus	Prosopisteron	tuamotuensis	Hylaeus tuamotuensis Michener, 1965	R.R. Snelling 1997	male	1	-14.47	-145.04			5000			Teavaroa to Opakari	1984-06-29		G.A. Samuelson	French Polynesia				mostly on Euphorbia atoto			https://doi.org/10.3389/fevo.2024.1339446	BPBM
preservedSpecimen				Colletidae	Hylaeus	Prosopisteron	tuamotuensis	Hylaeus tuamotuensis Michener, 1965	R.R. Snelling 1997	female	1	-14.47	-145.04			5000			Teavaroa to Opakari	1984-06-29		G.A. Samuelson	French Polynesia				mostly on Euphorbia atoto			https://doi.org/10.3389/fevo.2024.1339446	BPBM
preservedSpecimen	18014	GA19MCE79		Colletidae	Hylaeus	Prosopisteron	veli	Hylaeus veli Dorey, Davies, and Parslow, 2024	James B Dorey	male	1	-16.8362	-179.973			10	872		Taveuni - Des Veoux track	2019/04/29		MIStevens, MCElmer	Fiji	JBDorey noticed little red flowers at the top of a high tree and began sweeping with the long net. Tree was about 10-15 m tall and likely a Myrtaceae. After first sweep noticed some colletids, likely Hylaeus sp. And we continued sweeping for a while catching colletids and Homalictus. There were many plants near this tree that we did not find bees on, including Stachytarpheta urticifolia, Polygala…		General sweep	Metrosideros collina var. collina			https://doi.org/10.3389/fevo.2024.1339446	SAMA		Holotype
preservedSpecimen	SAMA 32-035999	GA19MCE80		Colletidae	Hylaeus	Prosopisteron	veli	Hylaeus veli Dorey, Davies, and Parslow, 2024	James B Dorey	male	1	-16.8362	-179.973			10	872		Taveuni - Des Veoux track	2019/04/29		JBDorey	Fiji	JBDorey noticed little red flowers at the top of a high tree and began sweeping with the long net. Tree was about 10-15 m tall and likely a Myrtaceae. After first sweep noticed some colletids, likely Hylaeus sp. And we continued sweeping for a while catching colletids and Homalictus. There were many plants near this tree that we did not find bees on, including Stachytarpheta urticifolia, Polygala…		General sweep	Metrosideros collina var. collina			https://doi.org/10.3389/fevo.2024.1339446	SAMA
preservedSpecimen		GA19MCE80		Colletidae	Hylaeus	Prosopisteron	veli	Hylaeus veli Dorey, Davies, and Parslow, 2024	James B Dorey	male	1	-16.8362	-179.973			10	872		Taveuni - Des Veoux track	2019/04/29		JBDorey	Fiji	JBDorey noticed little red flowers at the top of a high tree and began sweeping with the long net. Tree was about 10-15 m tall and likely a Myrtaceae. After first sweep noticed some colletids, likely Hylaeus sp. And we continued sweeping for a while catching colletids and Homalictus. There were many plants near this tree that we did not find bees on, including Stachytarpheta urticifolia, Polygala…		General sweep	Metrosideros collina var. collina			https://doi.org/10.3389/fevo.2024.1339446	SAMA
preservedSpecimen		L6275				Amegilla	xylocopoides n.sp.	Amegilla xylocopoides Leijs, 2020		Male legs	1	-15.6705	144.588					Qld	19 km SE of Laura	2017-03-11		R. Leijs	Australia							https://doi.org/10.3897/zookeys.908.47375	ABTC		paratype
preservedSpecimen		L6249				Amegilla	calva	Amegilla calva (Rayment, 1935)		female	1	-26.2081	117.841					WA	25 km NW Belele	2005-10-20		R.Leijs	Australia							https://doi.org/10.3897/zookeys.908.47375	ABTC
preservedSpecimen		L6257				Amegilla	albiceps	Amegilla albiceps (Rayment, 1951)		male	1	-31.0984	138.665					SA	3km W of Blinman	2005-01-27		R.Leijs	Australia							https://doi.org/10.3897/zookeys.908.47375	ABTC
preservedSpecimen		L6258				Amegilla	albiceps	Amegilla albiceps (Rayment, 1951)		female	1	-31.0984	138.665					SA	3km W of Blinman	2005-01-27		R.Leijs	Australia							https://doi.org/10.3897/zookeys.908.47375	ABTC
preservedSpecimen		L6278				Amegilla	scoparia n.sp.	Amegilla scoparia Leijs, 2020		Male legs	1	-30.7263	137.201					SA	Andamooka HS	2016-08-29		R. Leijs	Australia							https://doi.org/10.3897/zookeys.908.47375	ABTC		paratype
preservedSpecimen		L6279				Amegilla	scoparia n.sp.	Amegilla scoparia Leijs, 2020		female legs	1	-30.7263	137.201					SA	Andamooka HS	2016-08-29		R. Leijs	Australia							https://doi.org/10.3897/zookeys.908.47375	ABTC		paratype
preservedSpecimen		L6250				Amegilla	griseocincta n.sp.	Amegilla griseocincta Leijs, 2020		female	1	-29.0719	135.831					SA	Anna Creek	2006-04-06		RL	Australia							https://doi.org/10.3897/zookeys.908.47375	ABTC
preservedSpecimen		L6251				Amegilla	griseocincta n.sp.	Amegilla griseocincta Leijs, 2020		female	1	-29.1287	135.7					SA	Anna Creek	2006-04-06		RL	Australia							https://doi.org/10.3897/zookeys.908.47375	ABTC
preservedSpecimen		L6252				Amegilla	griseocincta n.sp.	Amegilla griseocincta Leijs, 2020		female	1	-29.1287	135.7					SA	Anna Creek	2006-04-06		RL	Australia							https://doi.org/10.3897/zookeys.908.47375	ABTC
preservedSpecimen		L6253				Amegilla	griseocincta n.sp.	Amegilla griseocincta Leijs, 2020		male	1	-29.14	135.682					SA	Anna Creek	2006-04-06		RL	Australia							https://doi.org/10.3897/zookeys.908.47375	ABTC
preservedSpecimen		L6263				Amegilla	scoparia n.sp.	Amegilla scoparia Leijs, 2020		male	1	-30.6179	139.321					SA	Beltana Stn	2009-06-15		R. & P. Leijs	Australia							https://doi.org/10.3897/zookeys.908.47375	ABTC
preservedSpecimen		L6264				Amegilla	scoparia n.sp.	Amegilla scoparia Leijs, 2020		male	1	-30.6179	139.321					SA	Beltana Stn	2009-06-15		R. & P. Leijs	Australia							https://doi.org/10.3897/zookeys.908.47375	ABTC
preservedSpecimen		L6277				Amegilla	albigenella	Amegilla albigenella Michener, 1965		male legs	1	-30.2934	135.418					SA	Bon Bon Stn	2010-10-26		R.Leijs	Australia							https://doi.org/10.3897/zookeys.908.47375	ABTC
preservedSpecimen		L6274				Amegilla	scoparia n.sp.	Amegilla scoparia Leijs, 2020		female	1	-29.3333	129.533					SA	Great Victoria Desert , 1km N Business Rd on BMR6	2017-09-06		J.A. Forrest	Australia							https://doi.org/10.3897/zookeys.908.47375	ABTC
preservedSpecimen		L6276				Amegilla	youngi n.sp.	Amegilla youngi Leijs, 2020		female legs	1	-13.481	130.699					NT	Litchfield	2006-02-18		D.A.Young	Australia							https://doi.org/10.3897/zookeys.908.47375	ABTC		holotype
preservedSpecimen		L6270				Amegilla	bombiformis	Amegilla bombiformis (Smith, 1854)		female	1	-27.9667	153.183						Mt Tamborine	1997-02-22		R.Leijs	Australia							https://doi.org/10.3897/zookeys.908.47375	ABTC
preservedSpecimen		L6273				Amegilla	flava	Amegilla flava (Friese, 1911)		male legs	1	-33.4689	135.159					SA	near Mt Wedge	2007-12-19		R. & P. Leijs	Australia							https://doi.org/10.3897/zookeys.908.47375	ABTC
preservedSpecimen		L6254				Amegilla	scoparia n.sp.	Amegilla scoparia Leijs, 2020		female	1	-32.463	137.743					SA	Port Augusta arid garden	2007-10-01		R.Leijs	Australia							https://doi.org/10.3897/zookeys.908.47375	ABTC
preservedSpecimen		L6255				Amegilla	scoparia n.sp.	Amegilla scoparia Leijs, 2020		female	1	-32.463	137.743					SA	Port Augusta arid garden	2007-10-01		R.Leijs	Australia							https://doi.org/10.3897/zookeys.908.47375	ABTC
preservedSpecimen		L6256				Amegilla	scoparia n.sp.	Amegilla scoparia Leijs, 2020		female	1	-32.463	137.743					SA	Port Augusta arid garden	2007-10-01		R.Leijs	Australia							https://doi.org/10.3897/zookeys.908.47375	ABTC
preservedSpecimen		L6268				Amegilla	bombiformis	Amegilla bombiformis (Smith, 1854)		female	1	-28.1	153.2					QLD	Southwest rd, Beechmont 4211	2003-04-12			Australia							https://doi.org/10.3897/zookeys.908.47375	ABTC
preservedSpecimen		L6269				Amegilla	bombiformis	Amegilla bombiformis (Smith, 1854)		female	1	-27.5833	153.317					QLD	Victoria Point	2003-04-18			Australia							https://doi.org/10.3897/zookeys.908.47375	ABTC
preservedSpecimen		L6271				Amegilla	bombiformis	Amegilla bombiformis (Smith, 1854)		female	1	-27.5833	153.317					QLD	Victoria Point	2003-04-13		J. Klampp	Australia							https://doi.org/10.3897/zookeys.908.47375	ABTC
preservedSpecimen		L6259				Amegilla	albigenella	Amegilla albigenella Michener, 1965		male	1	-27.2558	117.434					WA	Walbo Rock	2005-10-18		R.Leijs	Australia							https://doi.org/10.3897/zookeys.908.47375	ABTC
preservedSpecimen		L6260				Amegilla	albigenella	Amegilla albigenella Michener, 1965		male	1	-27.2558	117.434					WA	Walbo Rock	2005-10-18		R.Leijs	Australia							https://doi.org/10.3897/zookeys.908.47375	ABTC
preservedSpecimen		L6261				Amegilla	albigenella	Amegilla albigenella Michener, 1965		male	1	-27.2558	117.434					WA	Walbo Rock	2005-10-18		R.Leijs	Australia							https://doi.org/10.3897/zookeys.908.47375	ABTC
preservedSpecimen		L6262				Amegilla	albigenella	Amegilla albigenella Michener, 1965		male	1	-27.2558	117.434					WA	Walbo Rock	2005-10-18		R.Leijs	Australia							https://doi.org/10.3897/zookeys.908.47375	ABTC
preservedSpecimen		L6272				Amegilla	albigenella	Amegilla albigenella Michener, 1965		male legs	1	-27.2558	117.434					WA	Walbo Rock	2005-10-18		R.Leijs	Australia							https://doi.org/10.3897/zookeys.908.47375	ABTC
preservedSpecimen		L6265				Amegilla	bombiformis	Amegilla bombiformis (Smith, 1854)		female	1	-33.7833	151.2					NSW	Willoughby	2003-03-21		M.Bell	Australia							https://doi.org/10.3897/zookeys.908.47375	ABTC
preservedSpecimen		L6266				Amegilla	bombiformis	Amegilla bombiformis (Smith, 1854)		female	1	-33.7833	151.2					NSW	Willoughby	2003-03-21		M.Bell	Australia							https://doi.org/10.3897/zookeys.908.47375	ABTC
preservedSpecimen		L6267				Amegilla	bombiformis	Amegilla bombiformis (Smith, 1854)		female	1	-33.7833	151.2					NSW	Willoughby	2003-03-21		M.Bell	Australia							https://doi.org/10.3897/zookeys.908.47375	ABTC
preservedSpecimen						Amegilla	flava	Amegilla flava (Friese, 1911)		male	1	-31.95	115.88					WA	Swan River				Australia							https://doi.org/10.3897/zookeys.908.47375	ADWA		Holotype cygni
preservedSpecimen		K.470157				Amegilla	bombiformis	Amegilla bombiformis (Smith, 1854)		Female	1	-31.77	152.57					NSW	"Lorien", Lansdowne	1985-12-01		G. & T. Williams	Australia							https://doi.org/10.3897/zookeys.908.47375	AM
preservedSpecimen		K.470103				Amegilla	scoparia n.sp.	Amegilla scoparia Leijs, 2020		Female	1	-31.314	144.414					NSW	100m W Tilpilly Homestead, Paroo-Darling NP	2010-09-21		D.R. Britton, J. Recsei	Australia							https://doi.org/10.3897/zookeys.908.47375	AM
preservedSpecimen		K.470110				Amegilla	scoparia n.sp.	Amegilla scoparia Leijs, 2020		Female	1	-25.622	146.6					QLD	20 km N Augathella	1987-08-02		N.W. Rodd	Australia							https://doi.org/10.3897/zookeys.908.47375	AM
preservedSpecimen		K.470108				Amegilla	scoparia n.sp.	Amegilla scoparia Leijs, 2020		Male	1	-23.274	144.121					QLD	24 km N of Longreach	1987-08-03		N.W. Rodd	Australia							https://doi.org/10.3897/zookeys.908.47375	AM
preservedSpecimen		K.470109				Amegilla	scoparia n.sp.	Amegilla scoparia Leijs, 2020		Male	1	-23.274	144.121					QLD	24 km N of Longreach	1987-08-03		N.W. Rodd	Australia							https://doi.org/10.3897/zookeys.908.47375	AM
preservedSpecimen		K.361435				Amegilla	bombiformis	Amegilla bombiformis (Smith, 1854)		Female	1	-28.8089	153.03					NSW	24 km W Lismore	2007-01-17		M. Batley	Australia							https://doi.org/10.3897/zookeys.908.47375	AM
preservedSpecimen		K.470178				Amegilla	calva	Amegilla calva (Rayment, 1935)		Male	1	-24.267	145.338					QLD	25 km N Blackall	1988-09-13		N.W. Rodd	Australia							https://doi.org/10.3897/zookeys.908.47375	AM
preservedSpecimen		K.470179				Amegilla	calva	Amegilla calva (Rayment, 1935)		Male	1	-24.267	145.338					QLD	25 km N Blackall	1988-09-13		N.W. Rodd	Australia							https://doi.org/10.3897/zookeys.908.47375	AM
preservedSpecimen		K.470105				Amegilla	scoparia n.sp.	Amegilla scoparia Leijs, 2020		Female	1	-23.266	144.115					QLD	25 km N of Longreach	1989-06-12		N.W. Rodd	Australia							https://doi.org/10.3897/zookeys.908.47375	AM
preservedSpecimen		K.362658				Amegilla	scoparia n.sp.	Amegilla scoparia Leijs, 2020		Female	1	-29.8358	146.016					NSW	32 km N Bourke	2007-09-05		M. Batley	Australia							https://doi.org/10.3897/zookeys.908.47375	AM
preservedSpecimen		K.470087				Amegilla	calva	Amegilla calva (Rayment, 1935)		Male	1	-25.3939	142.676					QLD	4 km E of Windorah	1984-10-02		J. Sankey	Australia							https://doi.org/10.3897/zookeys.908.47375	AM
preservedSpecimen		K.470088				Amegilla	calva	Amegilla calva (Rayment, 1935)		Male	1	-25.3939	142.676					QLD	4 km E of Windorah	1984-10-02		J. Sankey	Australia							https://doi.org/10.3897/zookeys.908.47375	AM
preservedSpecimen		K.470089				Amegilla	calva	Amegilla calva (Rayment, 1935)		Male	1	-25.3939	142.676					QLD	4 km E of Windorah	1984-10-02		J. Sankey	Australia							https://doi.org/10.3897/zookeys.908.47375	AM
preservedSpecimen		K.470090				Amegilla	calva	Amegilla calva (Rayment, 1935)		Male	1	-25.3939	142.676					QLD	4 km E of Windorah	1984-10-02		J. Sankey	Australia							https://doi.org/10.3897/zookeys.908.47375	AM
preservedSpecimen		K.470091				Amegilla	calva	Amegilla calva (Rayment, 1935)		Male	1	-25.3939	142.676					QLD	4 km E of Windorah	1984-10-02		J. Sankey	Australia							https://doi.org/10.3897/zookeys.908.47375	AM
preservedSpecimen		K.470092				Amegilla	calva	Amegilla calva (Rayment, 1935)		Male	1	-25.3939	142.676					QLD	4 km E of Windorah	1984-10-02		J. Sankey	Australia							https://doi.org/10.3897/zookeys.908.47375	AM
preservedSpecimen		K.470093				Amegilla	calva	Amegilla calva (Rayment, 1935)		Male	1	-25.3939	142.676					QLD	4 km E of Windorah	1984-10-02		J. Sankey	Australia							https://doi.org/10.3897/zookeys.908.47375	AM
preservedSpecimen		K.362659				Amegilla	scoparia n.sp.	Amegilla scoparia Leijs, 2020		Female	1	-29.5269	145.825					NSW	67 km N Bourke	2007-09-05		M. Batley	Australia							https://doi.org/10.3897/zookeys.908.47375	AM
preservedSpecimen		K.361599				Amegilla	batleyi n.sp.	Amegilla batleyi Leijs, 2020		Male	1	-19.6697	135.768					NT	7 km NW Barkly Rdhse	2008-05-14		M. Batley	Australia							https://doi.org/10.3897/zookeys.908.47375	AM		holotype
preservedSpecimen		K.470170				Amegilla	bombiformis	Amegilla bombiformis (Smith, 1854)		Male	1	-31.7535	152.538					NSW	about 3km North of Lansdowne	1985-02-15		G.A. Williams	Australia							https://doi.org/10.3897/zookeys.908.47375	AM
preservedSpecimen		K.470172				Amegilla	bombiformis	Amegilla bombiformis (Smith, 1854)		Female	1	-33.87	151.17					NSW	Annandale	1978-03-06			Australia							https://doi.org/10.3897/zookeys.908.47375	AM
preservedSpecimen		K.470173				Amegilla	bombiformis	Amegilla bombiformis (Smith, 1854)		Male	1	-33.87	151.17					NSW	Annandale	1979-02-26			Australia							https://doi.org/10.3897/zookeys.908.47375	AM
preservedSpecimen		K.470129				Amegilla	bombiformis	Amegilla bombiformis (Smith, 1854)		Male	1	-34.2	150.78					NSW	Appin	1962-03-10			Australia							https://doi.org/10.3897/zookeys.908.47375	AM
preservedSpecimen		K.105237				Amegilla	bombiformis	Amegilla bombiformis (Smith, 1854)		female	1	-33.8894	151.127					NSW	Ashfield	1947-03-04			Australia							https://doi.org/10.3897/zookeys.908.47375	AM
preservedSpecimen		K.59977				Amegilla	bombiformis	Amegilla bombiformis (Smith, 1854)			1	-33.8894	151.127					NSW	Ashfield			L. Cheel	Australia							https://doi.org/10.3897/zookeys.908.47375	AM
preservedSpecimen		K.108225				Amegilla	bombiformis	Amegilla bombiformis (Smith, 1854)		Male	1	-33.8744	151.213					NSW	Australian Museum	1982-02-20		A. Griffiths	Australia							https://doi.org/10.3897/zookeys.908.47375	AM
preservedSpecimen		K.361430				Amegilla	bombiformis	Amegilla bombiformis (Smith, 1854)		Female	1	-28.8756	151.743					QLD	Ballandean	2007-01-24		M. Batley	Australia							https://doi.org/10.3897/zookeys.908.47375	AM
preservedSpecimen		K.361437				Amegilla	rhodoscymna	Amegilla rhodoscymna (Cockerell, 1905)		Male	1	-28.8756	151.743					QLD	Ballandean	2007-01-24		M. Batley	Australia							https://doi.org/10.3897/zookeys.908.47375	AM
preservedSpecimen		K.470184				Amegilla	bombiformis	Amegilla bombiformis (Smith, 1854)		Female	1	-28.87	153.57					NSW	Ballina District	1926-03-01		W.S. Pender	Australia							https://doi.org/10.3897/zookeys.908.47375	AM
preservedSpecimen		K.470162				Amegilla	bombiformis	Amegilla bombiformis (Smith, 1854)		Female	1	-33.92	151.08					NSW	Belmore	1975-09-19		G. Walters	Australia							https://doi.org/10.3897/zookeys.908.47375	AM
preservedSpecimen		K.105253				Amegilla	bombiformis	Amegilla bombiformis (Smith, 1854)		female	1	-35.2271	150.49					NSW	Bendalong	1969-01-05		G. Daniels	Australia							https://doi.org/10.3897/zookeys.908.47375	AM
preservedSpecimen		K.470164				Amegilla	bombiformis	Amegilla bombiformis (Smith, 1854)		Female	1	-33.63	151.3					NSW	Bilgola Plateau, Sydney	1975-03-30		FW	Australia							https://doi.org/10.3897/zookeys.908.47375	AM
preservedSpecimen		K.470137				Amegilla	bombiformis	Amegilla bombiformis (Smith, 1854)		Female	1	-34	151.1					NSW	Blakehurst	1964-09-22		W. Lester	Australia							https://doi.org/10.3897/zookeys.908.47375	AM
preservedSpecimen		K.105245				Amegilla	bombiformis	Amegilla bombiformis (Smith, 1854)		female	1	-32.317	152.522					NSW	Booti Booti	1952-01-09			Australia							https://doi.org/10.3897/zookeys.908.47375	AM
preservedSpecimen		K.470095				Amegilla	rhodoscymna	Amegilla rhodoscymna (Cockerell, 1905)		Male	1	-24.58	151.68					QLD	Bundaberg	1987-12-24			Australia							https://doi.org/10.3897/zookeys.908.47375	AM
preservedSpecimen		K.105244				Amegilla	bombiformis	Amegilla bombiformis (Smith, 1854)		female	1	-26.8583	151.606					QLD	Bunya Mountains National Park	1940-02-12		N. Geary	Australia							https://doi.org/10.3897/zookeys.908.47375	AM
preservedSpecimen		K.470117				Amegilla	bombiformis	Amegilla bombiformis (Smith, 1854)		Female	1	-26.8583	151.606					QLD	Bunya Mountains National Park	1940-02-12		N. Geary	Australia							https://doi.org/10.3897/zookeys.908.47375	AM
preservedSpecimen		K.470083				Amegilla	xylocopoides n.sp.	Amegilla xylocopoides Leijs, 2020		Male	1	-15.5081	143.508					QLD	Cape Yorke	1985-06-04		N.W. Rodd	Australia							https://doi.org/10.3897/zookeys.908.47375	AM		paratype
preservedSpecimen		K.470084				Amegilla	xylocopoides n.sp.	Amegilla xylocopoides Leijs, 2020		Male	1	-15.5081	143.508					QLD	Cape Yorke	1985-06-04		N.W. Rodd	Australia							https://doi.org/10.3897/zookeys.908.47375	AM		paratype
preservedSpecimen		K.470085				Amegilla	xylocopoides n.sp.	Amegilla xylocopoides Leijs, 2020		Male	1	-15.5081	143.508					QLD	Cape Yorke	1985-06-04		N.W. Rodd	Australia							https://doi.org/10.3897/zookeys.908.47375	AM		paratype
preservedSpecimen		K.470086				Amegilla	xylocopoides n.sp.	Amegilla xylocopoides Leijs, 2020		Male	1	-15.5081	143.508					QLD	Cape Yorke	1985-06-04		N.W. Rodd	Australia							https://doi.org/10.3897/zookeys.908.47375	AM		paratype
preservedSpecimen		K.470152				Amegilla	bombiformis	Amegilla bombiformis (Smith, 1854)		Female	1	-33.97	151.12					NSW	Carlton	1999-03-23		K. Phan-Thien	Australia							https://doi.org/10.3897/zookeys.908.47375	AM
preservedSpecimen		K.105249				Amegilla	bombiformis	Amegilla bombiformis (Smith, 1854)		Male	1	-33.757	151.085					NSW	Cheltenham	1952-02-17			Australia							https://doi.org/10.3897/zookeys.908.47375	AM
preservedSpecimen		K.105241				Amegilla	bombiformis	Amegilla bombiformis (Smith, 1854)		female	1	-33.92	151.28					NSW	Clovelly	1933-03-11		P. Whitley	Australia							https://doi.org/10.3897/zookeys.908.47375	AM
preservedSpecimen		K.470185				Amegilla	bombiformis	Amegilla bombiformis (Smith, 1854)		Female	1	-33.92	151.25					NSW	Clovelly, Sydney			B. McLoughlin	Australia							https://doi.org/10.3897/zookeys.908.47375	AM
preservedSpecimen		K.470154				Amegilla	bombiformis	Amegilla bombiformis (Smith, 1854)		Female	1	-31.5	145.83					NSW	Cobar	1981-12-01		F. Ignacz	Australia							https://doi.org/10.3897/zookeys.908.47375	AM
preservedSpecimen		K.470097				Amegilla	rhodoscymna	Amegilla rhodoscymna (Cockerell, 1905)		Male	1	-15.47	145.25					QLD	Cooktown	1982-07-16		R.W. Rodd	Australia							https://doi.org/10.3897/zookeys.908.47375	AM
preservedSpecimen		K.470176				Amegilla	bombiformis	Amegilla bombiformis (Smith, 1854)		Female	1	-33.89	151.25					NSW	Coopers Park	1965-02-21		J. Varley	Australia							https://doi.org/10.3897/zookeys.908.47375	AM
preservedSpecimen		K.470106				Amegilla	scoparia n.sp.	Amegilla scoparia Leijs, 2020		Female	1	-23.1129	113.873					WA	Coral Bay Turnoff, south of Exmouth	1978-07-31		G.A. Holloway	Australia							https://doi.org/10.3897/zookeys.908.47375	AM
preservedSpecimen		K.470134				Amegilla	bombiformis	Amegilla bombiformis (Smith, 1854)		Female	1	-34.0485	151.151					NSW	Cronulla	2004-07-29		J. Norfolk	Australia							https://doi.org/10.3897/zookeys.908.47375	AM
preservedSpecimen		K.470135				Amegilla	bombiformis	Amegilla bombiformis (Smith, 1854)		Female	1	-34.0485	151.151					NSW	Cronulla	2004-07-29		J. Norfolk	Australia							https://doi.org/10.3897/zookeys.908.47375	AM
preservedSpecimen		K.108226				Amegilla	calva	Amegilla calva (Rayment, 1935)		Female	1	-32.17	151.15					NSW	Davis Creek	1931-12-02		F.H. Macartney	Australia							https://doi.org/10.3897/zookeys.908.47375	AM
preservedSpecimen		K.108227				Amegilla	calva	Amegilla calva (Rayment, 1935)		female	1	-32.17	151.15					NSW	Davis Creek	1931-12-02		F.H. Macartney	Australia							https://doi.org/10.3897/zookeys.908.47375	AM
preservedSpecimen		K.470100				Amegilla	calva	Amegilla calva (Rayment, 1935)		Female	1	-32.17	151.15					NSW	Davis Creek	1931-12-02		F.H. Macartney	Australia							https://doi.org/10.3897/zookeys.908.47375	AM
preservedSpecimen		K.470101				Amegilla	calva	Amegilla calva (Rayment, 1935)		Female	1	-32.17	151.15					NSW	Davis Creek	1931-12-02		F.H. Macartney	Australia							https://doi.org/10.3897/zookeys.908.47375	AM
preservedSpecimen		K.108229				Amegilla	calva	Amegilla calva (Rayment, 1935)			1	-33.5558	115.561					WA	district	1957-01-07		A. Snell	Australia							https://doi.org/10.3897/zookeys.908.47375	AM
preservedSpecimen		K.105255				Amegilla	bombiformis	Amegilla bombiformis (Smith, 1854)		female	1	-28.87	153.58					NSW	East Ballina	1930-02-09		C. Chadwick	Australia							https://doi.org/10.3897/zookeys.908.47375	AM
preservedSpecimen		K.470153				Amegilla	bombiformis	Amegilla bombiformis (Smith, 1854)		Female	1	-33.7858	151.077					NSW	Eastwood	2003-03-10		R. Ascoli	Australia							https://doi.org/10.3897/zookeys.908.47375	AM
preservedSpecimen		K.470143				Amegilla	bombiformis	Amegilla bombiformis (Smith, 1854)		Male	1	-33.6983	151.27					NSW	Elanora Heights	1987-02-28		T. Robinson	Australia							https://doi.org/10.3897/zookeys.908.47375	AM
preservedSpecimen		K.108224				Amegilla	bombiformis	Amegilla bombiformis (Smith, 1854)		female	1	-28.7596	153.408					NSW	Eltham	1931-03-20		C. Chadwick	Australia							https://doi.org/10.3897/zookeys.908.47375	AM
preservedSpecimen		K.470119				Amegilla	bombiformis	Amegilla bombiformis (Smith, 1854)		Female	1	-28.7596	153.408					NSW	Eltham	1929-08-10		C. Chadwick	Australia							https://doi.org/10.3897/zookeys.908.47375	AM
preservedSpecimen		K.470132				Amegilla	bombiformis	Amegilla bombiformis (Smith, 1854)		Female	1	-28.7596	153.408					NSW	Eltham	1929-03-23		C. Chadwick	Australia							https://doi.org/10.3897/zookeys.908.47375	AM
preservedSpecimen		K.470133				Amegilla	bombiformis	Amegilla bombiformis (Smith, 1854)		Female	1	-28.7596	153.408					NSW	Eltham	1929-02-11		C. Chadwick	Australia							https://doi.org/10.3897/zookeys.908.47375	AM
preservedSpecimen		K.470181				Amegilla	bombiformis	Amegilla bombiformis (Smith, 1854)		Male	1	-33.77	151.08					NSW	Epping	1975-03-27		T. Tripack	Australia							https://doi.org/10.3897/zookeys.908.47375	AM
preservedSpecimen		K.470131				Amegilla	bombiformis	Amegilla bombiformis (Smith, 1854)		Female	1	-34.43	150.87					NSW	Figtree, Wollongong	2005-03-01		J. Gollan	Australia							https://doi.org/10.3897/zookeys.908.47375	AM
preservedSpecimen		K.470082				Amegilla	xylocopoides n.sp.	Amegilla xylocopoides Leijs, 2020		Female	1	-12.72	143.3					QLD	Iron Range, Cape York	1966		C. O'Reilly	Australia							https://doi.org/10.3897/zookeys.908.47375	AM		allotype
preservedSpecimen		K.361436				Amegilla	bombiformis	Amegilla bombiformis (Smith, 1854)		Female	1	-31.1019	152.833					NSW	Kempsey	2007-01-17		M. Batley	Australia							https://doi.org/10.3897/zookeys.908.47375	AM
preservedSpecimen		K.470112				Amegilla	dawsoni	Amegilla dawsoni (Rayment, 1951)		Male	1	-24.58	114.67					WA	Kennedy Range	2006-07-18		L.C. Brooker, M.G. Brooker	Australia							https://doi.org/10.3897/zookeys.908.47375	AM
preservedSpecimen		K.470107				Amegilla	flava	Amegilla flava (Friese, 1911)		Female	1	-35.049	117.934					WA	King George Sound				Australia							https://doi.org/10.3897/zookeys.908.47375	AM
preservedSpecimen		K.361431				Amegilla	flava	Amegilla flava (Friese, 1911)		male	1	-33.0214	136.816					SA	Lake Gilles NP	2006-03-03		M. Batley	Australia							https://doi.org/10.3897/zookeys.908.47375	AM
preservedSpecimen		K.105243				Amegilla	bombiformis	Amegilla bombiformis (Smith, 1854)		female	1	-31.782	152.535					NSW	Landsdowne	1981-02-25		G. Williams, T. Williams	Australia							https://doi.org/10.3897/zookeys.908.47375	AM
preservedSpecimen		K.105246				Amegilla	bombiformis	Amegilla bombiformis (Smith, 1854)		Male	1	-33.8157	151.167					NSW	Lane Cove	1949-02-26			Australia							https://doi.org/10.3897/zookeys.908.47375	AM
preservedSpecimen		K.105247				Amegilla	bombiformis	Amegilla bombiformis (Smith, 1854)		female	1	-33.8157	151.167					NSW	Lane Cove	1947-02-23			Australia							https://doi.org/10.3897/zookeys.908.47375	AM
preservedSpecimen		K.105248				Amegilla	bombiformis	Amegilla bombiformis (Smith, 1854)		female	1	-33.8157	151.167					NSW	Lane Cove	1944-02-18			Australia							https://doi.org/10.3897/zookeys.908.47375	AM
preservedSpecimen		K.470113				Amegilla	bombiformis	Amegilla bombiformis (Smith, 1854)		Male	1	-33.8157	151.167					NSW	Lane Cove	1946-03-23			Australia							https://doi.org/10.3897/zookeys.908.47375	AM
preservedSpecimen		K.470114				Amegilla	bombiformis	Amegilla bombiformis (Smith, 1854)		Male	1	-33.8157	151.167					NSW	Lane Cove	1944-03-19			Australia							https://doi.org/10.3897/zookeys.908.47375	AM
preservedSpecimen		K.470115				Amegilla	bombiformis	Amegilla bombiformis (Smith, 1854)		Male	1	-33.8157	151.167					NSW	Lane Cove	1948-04-18			Australia							https://doi.org/10.3897/zookeys.908.47375	AM
preservedSpecimen		K.470116				Amegilla	bombiformis	Amegilla bombiformis (Smith, 1854)		Female	1	-33.8157	151.167					NSW	Lane Cove	1944-04-13			Australia							https://doi.org/10.3897/zookeys.908.47375	AM
preservedSpecimen		K.470156				Amegilla	bombiformis	Amegilla bombiformis (Smith, 1854)		Female	1	-31.77	152.53					NSW	Lansdowne, 3km N Lansdowne, Nne Taree	1985-02-21		G. Williams	Australia							https://doi.org/10.3897/zookeys.908.47375	AM
preservedSpecimen		K.105240				Amegilla	bombiformis	Amegilla bombiformis (Smith, 1854)		female	1	-33.88	151.17					NSW	Leichardt	1934-01-18			Australia							https://doi.org/10.3897/zookeys.908.47375	AM
preservedSpecimen		K.470160				Amegilla	bombiformis	Amegilla bombiformis (Smith, 1854)		Female	1	-33.78	151.17					NSW	Lindfield	1976-04-04		FW	Australia							https://doi.org/10.3897/zookeys.908.47375	AM
preservedSpecimen		K.470127				Amegilla	bombiformis	Amegilla bombiformis (Smith, 1854)		Female	1	-33.35	151.5					NSW	Long Jetty	1951-03-01		A.R. Campbell	Australia							https://doi.org/10.3897/zookeys.908.47375	AM
preservedSpecimen		K.470158				Amegilla	bombiformis	Amegilla bombiformis (Smith, 1854)		Female	1	-28.0772	153.248					QLD	Lower Beechmont	1984-10-05		N.W. Rodd	Australia							https://doi.org/10.3897/zookeys.908.47375	AM
preservedSpecimen		K.470163				Amegilla	bombiformis	Amegilla bombiformis (Smith, 1854)		Female	1	-33.8583	151.288					NSW	Manly	1980-02-10			Australia							https://doi.org/10.3897/zookeys.908.47375	AM
preservedSpecimen		K.361433				Amegilla	bombiformis	Amegilla bombiformis (Smith, 1854)		Male	1	-33.5539	151.069					NSW	Marramarra NP	2001-02-04		M. Batley	Australia							https://doi.org/10.3897/zookeys.908.47375	AM
preservedSpecimen		K.105236				Amegilla	bombiformis	Amegilla bombiformis (Smith, 1854)		female	1	-33.912	151.16					NSW	Marrickville	1922-01-04		E. Mitchell	Australia							https://doi.org/10.3897/zookeys.908.47375	AM
preservedSpecimen		K.105238				Amegilla	bombiformis	Amegilla bombiformis (Smith, 1854)		female	1	-32.93	151.75					NSW	Merewether	1970-04-18		M. Saltone	Australia							https://doi.org/10.3897/zookeys.908.47375	AM
preservedSpecimen		K.470098				Amegilla	rhodoscymna	Amegilla rhodoscymna (Cockerell, 1905)		Female	1	-12.712	143.29					QLD	Middle Claudie River	1974-10-04		M.S. Moulds	Australia							https://doi.org/10.3897/zookeys.908.47375	AM
preservedSpecimen		K.105234				Amegilla	bombiformis	Amegilla bombiformis (Smith, 1854)		Male	1	-33.8275	151.243					NSW	Mosman	1900-01-03			Australia							https://doi.org/10.3897/zookeys.908.47375	AM
preservedSpecimen		K.105239				Amegilla	bombiformis	Amegilla bombiformis (Smith, 1854)		Male	1	-33.8275	151.243					NSW	Mosman	1957-01-28			Australia							https://doi.org/10.3897/zookeys.908.47375	AM
preservedSpecimen		K.470120				Amegilla	bombiformis	Amegilla bombiformis (Smith, 1854)		Male	1	-33.8275	151.243					NSW	Mosman	1957-02-03		W.W. Wirth	Australia							https://doi.org/10.3897/zookeys.908.47375	AM
preservedSpecimen		K.470138				Amegilla	bombiformis	Amegilla bombiformis (Smith, 1854)		Female	1	-33.5485	150.418					NSW	Mount Tomah	1981-03-09		N.W. Rodd	Australia							https://doi.org/10.3897/zookeys.908.47375	AM
preservedSpecimen		K.470111				Amegilla	albiceps	Amegilla albiceps (Rayment, 1951)		male	1	-37.1246	145.081					VIC	Mt Hope, Tallarook	1993-02-25		D.R. Britton	Australia							https://doi.org/10.3897/zookeys.908.47375	AM
preservedSpecimen		K.470147				Amegilla	bombiformis	Amegilla bombiformis (Smith, 1854)		Female	1	-33.55	150.42					NSW	Mt Tomah, Blue Mtns	1981-03-09		N.W. Rodd	Australia							https://doi.org/10.3897/zookeys.908.47375	AM
preservedSpecimen		K.470182				Amegilla	bombiformis	Amegilla bombiformis (Smith, 1854)		Female	1	-33.55	150.42					NSW	Mt Tomah, Blue Mtns	1983-03-02		N.W. Rodd	Australia							https://doi.org/10.3897/zookeys.908.47375	AM
preservedSpecimen		K.105242				Amegilla	bombiformis	Amegilla bombiformis (Smith, 1854)		female	1	-32.932	151.785					NSW	Newcastle	1948		V.A. Wardell	Australia							https://doi.org/10.3897/zookeys.908.47375	AM
preservedSpecimen		K.361432				Amegilla	bombiformis	Amegilla bombiformis (Smith, 1854)		Male	1	-33.7644	151.106					NSW	North Ryde	1999-02-07		M. Batley	Australia							https://doi.org/10.3897/zookeys.908.47375	AM
preservedSpecimen		K.470126				Amegilla	bombiformis	Amegilla bombiformis (Smith, 1854)		Female	1	-33.8355	151.209					NSW	North Sydney	1918-12-01		A. Musgrave	Australia							https://doi.org/10.3897/zookeys.908.47375	AM
preservedSpecimen		K.470187				Amegilla	bombiformis	Amegilla bombiformis (Smith, 1854)			1	-33.8355	151.209					NSW	North Sydney	1920-02-26		A. Musgrave	Australia							https://doi.org/10.3897/zookeys.908.47375	AM
preservedSpecimen		K.470104				Amegilla	scoparia n.sp.	Amegilla scoparia Leijs, 2020		Female	1	-31.3698	138.715					SA	Oraparinna, Flinders Range NP	1982-10-02		R. GREEN	Australia							https://doi.org/10.3897/zookeys.908.47375	AM
preservedSpecimen		K.105235				Amegilla	bombiformis	Amegilla bombiformis (Smith, 1854)		female	1	-33.6	151.32					NSW	Palm Beach Sydney	1934-03-15		Blaxland	Australia							https://doi.org/10.3897/zookeys.908.47375	AM
preservedSpecimen		K.470174				Amegilla	bombiformis	Amegilla bombiformis (Smith, 1854)		Female	1	-33.5479	151.307					NSW	Pearl Beach	1974-03-17		C. Morris	Australia							https://doi.org/10.3897/zookeys.908.47375	AM
preservedSpecimen		K.470175				Amegilla	bombiformis	Amegilla bombiformis (Smith, 1854)		Female	1	-33.5479	151.307					NSW	Pearl Beach	1974-03-16		C. Morris	Australia							https://doi.org/10.3897/zookeys.908.47375	AM
preservedSpecimen		K.470121				Amegilla	bombiformis	Amegilla bombiformis (Smith, 1854)		Female	1	-33.95	151.08					NSW	Penshurst	2008-02-23		D.J. Smith	Australia							https://doi.org/10.3897/zookeys.908.47375	AM
preservedSpecimen		K.360438				Amegilla	scoparia n.sp.	Amegilla scoparia Leijs, 2020		Female	1	-32.4622	137.744					SA	Port Augusta	2004-09-14		M. Batley	Australia							https://doi.org/10.3897/zookeys.908.47375	AM
preservedSpecimen		K.360439				Amegilla	scoparia n.sp.	Amegilla scoparia Leijs, 2020		Male	1	-32.4622	137.744					SA	Port Augusta	2004-09-14		M. Batley	Australia							https://doi.org/10.3897/zookeys.908.47375	AM
preservedSpecimen		K360439				Amegilla	scoparia n.sp.	Amegilla scoparia Leijs, 2020			1	-32.4624	137.744					SA	Port Augusta	2004-09-14		M.Batley	Australia							https://doi.org/10.3897/zookeys.908.47375	AM
preservedSpecimen		K.470155				Amegilla	bombiformis	Amegilla bombiformis (Smith, 1854)		Female	1	-33.95	151.05					NSW	Riverwood	1991-01-08		F. Ignacz	Australia							https://doi.org/10.3897/zookeys.908.47375	AM
preservedSpecimen		K.470177				Amegilla	bombiformis	Amegilla bombiformis (Smith, 1854)		Female	1	-33.78	151.2					NSW	Roseville Chase	1968-08-16		J. Hun	Australia							https://doi.org/10.3897/zookeys.908.47375	AM
preservedSpecimen		K.105250				Amegilla	bombiformis	Amegilla bombiformis (Smith, 1854)		female	1	-33.88	151.22					NSW	Royal Botanical Gardens, Sydney	1968-03-04		R. Coveney	Australia							https://doi.org/10.3897/zookeys.908.47375	AM
preservedSpecimen		K.105251				Amegilla	bombiformis	Amegilla bombiformis (Smith, 1854)		female	1	-33.88	151.22					NSW	Royal Botanical Gardens, Sydney	1968-03-05		R. Coveney	Australia							https://doi.org/10.3897/zookeys.908.47375	AM
preservedSpecimen		K.105252				Amegilla	bombiformis	Amegilla bombiformis (Smith, 1854)		Male	1	-33.88	151.22					NSW	Royal Botanical Gardens, Sydney	1968-03-15		R. Coveney	Australia							https://doi.org/10.3897/zookeys.908.47375	AM
preservedSpecimen		K.470180				Amegilla	bombiformis	Amegilla bombiformis (Smith, 1854)		Female	1	-33.65	151.28					NSW	Scotland Island	1997-03-23		J. Lowry	Australia							https://doi.org/10.3897/zookeys.908.47375	AM
preservedSpecimen		K.470183				Amegilla	bombiformis	Amegilla bombiformis (Smith, 1854)		Female	1	-33.65	151.28					NSW	Scotland Island	1997-03-23		J. Lowry	Australia							https://doi.org/10.3897/zookeys.908.47375	AM
preservedSpecimen		K.470145				Amegilla	albiceps	Amegilla albiceps (Rayment, 1951)		Female	1	-37.051	145.171					VIC	Seymour Busland Reserve, Goulbourn Valley Hwy	1993-02-18			Australia							https://doi.org/10.3897/zookeys.908.47375	AM
preservedSpecimen		K.470168				Amegilla	bombiformis	Amegilla bombiformis (Smith, 1854)		Male	1	-35.08	150.6					NSW	St. George's Basin	1980-02-12		N.W. Rodd	Australia							https://doi.org/10.3897/zookeys.908.47375	AM
preservedSpecimen		K.470169				Amegilla	bombiformis	Amegilla bombiformis (Smith, 1854)		Male	1	-35.08	150.6					NSW	St. George's Basin	1980-02-12		N.W. Rodd	Australia							https://doi.org/10.3897/zookeys.908.47375	AM
preservedSpecimen		K.470140				Amegilla	bombiformis	Amegilla bombiformis (Smith, 1854)		Female	1	-33.88	151.07					NSW	Strathfield, Sydney	1975-03-07		Noble	Australia							https://doi.org/10.3897/zookeys.908.47375	AM
preservedSpecimen		K.470144				Amegilla	bombiformis	Amegilla bombiformis (Smith, 1854)		Male	1	-32.329	152.266					NSW	Sullivans Gap, Bulladelah	1987-01-05		G & A Holloway	Australia							https://doi.org/10.3897/zookeys.908.47375	AM
preservedSpecimen		K.105254				Amegilla	bombiformis	Amegilla bombiformis (Smith, 1854)		female	1	-33.8652	151.21					NSW	Sydney	1960-12-01		J.W. Evens	Australia							https://doi.org/10.3897/zookeys.908.47375	AM
preservedSpecimen		K.470122				Amegilla	bombiformis	Amegilla bombiformis (Smith, 1854)		Female	1	-33.8652	151.21					NSW	Sydney				Australia							https://doi.org/10.3897/zookeys.908.47375	AM
preservedSpecimen		K.470123				Amegilla	bombiformis	Amegilla bombiformis (Smith, 1854)		Female	1	-33.8652	151.21					NSW	Sydney				Australia							https://doi.org/10.3897/zookeys.908.47375	AM
preservedSpecimen		K.470124				Amegilla	bombiformis	Amegilla bombiformis (Smith, 1854)		Female	1	-33.8652	151.21					NSW	Sydney				Australia							https://doi.org/10.3897/zookeys.908.47375	AM
preservedSpecimen		K.470125				Amegilla	bombiformis	Amegilla bombiformis (Smith, 1854)		Female	1	-33.8652	151.21					NSW	Sydney				Australia							https://doi.org/10.3897/zookeys.908.47375	AM
preservedSpecimen		K.470141				Amegilla	bombiformis	Amegilla bombiformis (Smith, 1854)		Female	1	-33.8756	151.21					NSW	Sydney, Hyde Park	1982-03-11		B.J. Day	Australia							https://doi.org/10.3897/zookeys.908.47375	AM
preservedSpecimen		K.108228				Amegilla	calva	Amegilla calva (Rayment, 1935)		female	1	-29.58	148.7					NSW	Taroo, near Pokataroo	1958-11-01		K.R. Black	Australia							https://doi.org/10.3897/zookeys.908.47375	AM
preservedSpecimen		K.470102				Amegilla	calva	Amegilla calva (Rayment, 1935)		Male	1	-29.58	148.7					NSW	Taroo, near Pokataroo	1958-11-01		K.R. Black	Australia							https://doi.org/10.3897/zookeys.908.47375	AM
preservedSpecimen		K.470102				Amegilla	calva	Amegilla calva (Rayment, 1935)		Female	1	-29.58	148.7					NSW	Taroo, near Pokataroo	1958-11-01		K.R. Black	Australia							https://doi.org/10.3897/zookeys.908.47375	AM
preservedSpecimen		K.470146				Amegilla	bombiformis	Amegilla bombiformis (Smith, 1854)		Female	1	-34.38	150.89					NSW	Tarrawanna	1999-06-25		J. Zealey	Australia							https://doi.org/10.3897/zookeys.908.47375	AM
preservedSpecimen		K.470165				Amegilla	bombiformis	Amegilla bombiformis (Smith, 1854)		Male	1	-35.07	150.67					NSW	Vincentia	1987-02-17		N.W. Rodd	Australia							https://doi.org/10.3897/zookeys.908.47375	AM
preservedSpecimen		K.470166				Amegilla	bombiformis	Amegilla bombiformis (Smith, 1854)		Male	1	-35.07	150.67					NSW	Vincentia	1987-02-17		N.W. Rodd	Australia							https://doi.org/10.3897/zookeys.908.47375	AM
preservedSpecimen		K.470167				Amegilla	bombiformis	Amegilla bombiformis (Smith, 1854)		Male	1	-35.07	150.67					NSW	Vincentia	1987-02-17		N.W. Rodd	Australia							https://doi.org/10.3897/zookeys.908.47375	AM
preservedSpecimen		K.470148				Amegilla	bombiformis	Amegilla bombiformis (Smith, 1854)		Female	1	-33.7568	151.129					NSW	West Pymble	1969-03-08		D.J. Scambler	Australia							https://doi.org/10.3897/zookeys.908.47375	AM
preservedSpecimen		K.470159				Amegilla	bombiformis	Amegilla bombiformis (Smith, 1854)		Female	1	-33.75	151.13					NSW	West Pymble	1986-03-20		P. Cantwell	Australia							https://doi.org/10.3897/zookeys.908.47375	AM
preservedSpecimen		K.470139				Amegilla	bombiformis	Amegilla bombiformis (Smith, 1854)		Female	1	-34.02	151.05					NSW	Woronora	1982-03-23		M.L. Bason	Australia							https://doi.org/10.3897/zookeys.908.47375	AM
preservedSpecimen		K.470094				Amegilla	rhodoscymna	Amegilla rhodoscymna (Cockerell, 1905)		Female	1	-15.5081	143.508					QLD		1986-08-04		N.W. Rodd	Australia							https://doi.org/10.3897/zookeys.908.47375	AM
preservedSpecimen		K.470096				Amegilla	rhodoscymna	Amegilla rhodoscymna (Cockerell, 1905)		Male	1	-27.471	153.024					QLD					Australia							https://doi.org/10.3897/zookeys.908.47375	AM
preservedSpecimen		K.470099				Amegilla	rhodoscymna	Amegilla rhodoscymna (Cockerell, 1905)		Male	1	-15.5081	143.508					QLD		1986-08-06		N.W. Rodd	Australia							https://doi.org/10.3897/zookeys.908.47375	AM
preservedSpecimen		K.470118				Amegilla	bombiformis	Amegilla bombiformis (Smith, 1854)		Female	1	-21.1412	149.186					QLD		1905-04-30		P. Marriage	Australia							https://doi.org/10.3897/zookeys.908.47375	AM
preservedSpecimen		K.470128				Amegilla	bombiformis	Amegilla bombiformis (Smith, 1854)		Female	1	-33.8652	151.21					NSW				F.A.A. Skuse	Australia							https://doi.org/10.3897/zookeys.908.47375	AM
preservedSpecimen		K.470130				Amegilla	bombiformis	Amegilla bombiformis (Smith, 1854)		Male	1							NSW		1957-01-28		W.W. Wirth	Australia							https://doi.org/10.3897/zookeys.908.47375	AM
preservedSpecimen		K.470136				Amegilla	bombiformis	Amegilla bombiformis (Smith, 1854)		Female	1	-33.4652	151.435					NSW		1985-12-08		S. Hunter	Australia							https://doi.org/10.3897/zookeys.908.47375	AM
preservedSpecimen		K.470142				Amegilla	bombiformis	Amegilla bombiformis (Smith, 1854)		Male	1	-33.4652	151.435					NSW		1987-11-25		S.G. Hunter	Australia							https://doi.org/10.3897/zookeys.908.47375	AM
preservedSpecimen		K.470149				Amegilla	bombiformis	Amegilla bombiformis (Smith, 1854)		Female	1	-33.5438	150.421					NSW		1984-03-06		N.W. Rodd	Australia							https://doi.org/10.3897/zookeys.908.47375	AM
preservedSpecimen		K.470150				Amegilla	bombiformis	Amegilla bombiformis (Smith, 1854)		Female	1	-33.5438	150.421					NSW		1984-03-15		N.W. Rodd	Australia							https://doi.org/10.3897/zookeys.908.47375	AM
preservedSpecimen		K.470151				Amegilla	bombiformis	Amegilla bombiformis (Smith, 1854)		Female	1	-33.5438	150.421					NSW		1981-03-13		N.W. Rodd	Australia							https://doi.org/10.3897/zookeys.908.47375	AM
preservedSpecimen		K.470161				Amegilla	bombiformis	Amegilla bombiformis (Smith, 1854)		Female	1	-33.4652	151.435					NSW		1983-01-01		S. Hunter	Australia							https://doi.org/10.3897/zookeys.908.47375	AM
preservedSpecimen		K.470171				Amegilla	bombiformis	Amegilla bombiformis (Smith, 1854)		Female	1	-33.4652	151.435					NSW		1989-02-16		S. Hunter	Australia							https://doi.org/10.3897/zookeys.908.47375	AM
preservedSpecimen		K.470186				Amegilla	bombiformis	Amegilla bombiformis (Smith, 1854)		Female	1	-27.471	153.024					QLD				McGregor	Australia							https://doi.org/10.3897/zookeys.908.47375	AM
preservedSpecimen		K.470188				Amegilla	bombiformis	Amegilla bombiformis (Smith, 1854)		Female	1	-16.8198	145.637					QLD				H.J. Carter	Australia							https://doi.org/10.3897/zookeys.908.47375	AM
preservedSpecimen		32-111744				Amegilla	scoparia n.sp.	Amegilla scoparia Leijs, 2020		female	1	-28.1405	144.879					QLD	10 mls W of Eulo	1963-07-29		A.L. Dyce	Australia							https://doi.org/10.3897/zookeys.908.47375	ANIC
preservedSpecimen		32-111833				Amegilla	rhodoscymna	Amegilla rhodoscymna (Cockerell, 1905)		male	1	-15.2667	144.983					QLD	14 km WbyN of Hope Vale Mission	1981-05-10		I.D. Naumann	Australia							https://doi.org/10.3897/zookeys.908.47375	ANIC
preservedSpecimen		32-111694				Amegilla	crenata n.sp.	Amegilla crenata Leijs, 2020		female	1	-18.9167	123.45					WA	145km SE by E Broome	1976-08-06		I.F.B. Common	Australia							https://doi.org/10.3897/zookeys.908.47375	ANIC
preservedSpecimen		32-111880				Amegilla	epaphrodita	Amegilla epaphrodita Brooks, 1988		female	1	-12.867	132.847					NT	15 km E of Mt. Cahill	1978-03-09		M.S. Upton	Australia							https://doi.org/10.3897/zookeys.908.47375	ANIC		Holotype
preservedSpecimen		32-111701				Amegilla	crenata n.sp.	Amegilla crenata Leijs, 2020		male	1	-12.7833	132.85					NT	19km NE by E of Mt Cahill	1972-11-16		J.C. Cardale	Australia							https://doi.org/10.3897/zookeys.908.47375	ANIC
preservedSpecimen		32-111779				Amegilla	bombiformis	Amegilla bombiformis (Smith, 1854)		male	1	-17.3134	145.493					QLD	2 km S of Atherton, Wongabel SF	1998-11-02		R.W. Matthews	Australia							https://doi.org/10.3897/zookeys.908.47375	ANIC
preservedSpecimen		32-111704				Amegilla	crenata n.sp.	Amegilla crenata Leijs, 2020		female	1	-12.3833	132.95					NT	5km NW by N of Cahill Crossing, East Alligator River	1973-06-09		J.C. Cardale	Australia							https://doi.org/10.3897/zookeys.908.47375	ANIC
preservedSpecimen		32-111702				Amegilla	crenata n.sp.	Amegilla crenata Leijs, 2020		male	1	-12.3833	132.933					NT	7km NW by N of Cahill Crossing, East Alligator River	1972-11-13		J.C. Cardale	Australia							https://doi.org/10.3897/zookeys.908.47375	ANIC
preservedSpecimen		32-111703				Amegilla	crenata n.sp.	Amegilla crenata Leijs, 2020		male	1	-12.3833	132.933					NT	7km NW by N of Cahill Crossing, East Alligator River	1972-11-13		J.C. Cardale	Australia							https://doi.org/10.3897/zookeys.908.47375	ANIC
preservedSpecimen		32-111795				Amegilla	scoparia n.sp.	Amegilla scoparia Leijs, 2020		female	1	-25.7667	133.283					NT	8km N of Kulgera	1978-09-21		J.C. Cardale	Australia							https://doi.org/10.3897/zookeys.908.47375	ANIC
preservedSpecimen		32-111705				Amegilla	crenata n.sp.	Amegilla crenata Leijs, 2020		male	1	-12.5167	132.9					NT	9km N by E of Mudginberry HS	1973-06-10		J.C. Cardale	Australia							https://doi.org/10.3897/zookeys.908.47375	ANIC
preservedSpecimen		32-111755				Amegilla	bombiformis	Amegilla bombiformis (Smith, 1854)		female	1	-32.9329	151.734					NSW	Adamstown	1964-03-23		L. Hill	Australia							https://doi.org/10.3897/zookeys.908.47375	ANIC
preservedSpecimen		32-111723				Amegilla	bombiformis	Amegilla bombiformis (Smith, 1854)		female	1	-33.7665	151.159					NSW	Allowrie, Killara	1929-01-20			Australia							https://doi.org/10.3897/zookeys.908.47375	ANIC
preservedSpecimen		32-111742				Amegilla	scoparia n.sp.	Amegilla scoparia Leijs, 2020		female	1	-24.3333	131.583					NT	Amadeus Basin, nr Reedy Rockhole	1962-08-23		P. Ranford	Australia							https://doi.org/10.3897/zookeys.908.47375	ANIC
preservedSpecimen		32-111675				Amegilla	dawsoni	Amegilla dawsoni (Rayment, 1951)		male	1	-22.5431	115.499					WA	Ashburton River			French	Australia							https://doi.org/10.3897/zookeys.908.47375	ANIC
preservedSpecimen		32-111760				Amegilla	bombiformis	Amegilla bombiformis (Smith, 1854)		female	1	-34.3047	150.929					NSW	Austinmer	1962-04-21		A.K. Mallise	Australia							https://doi.org/10.3897/zookeys.908.47375	ANIC
preservedSpecimen		32-111763				Amegilla	bombiformis	Amegilla bombiformis (Smith, 1854)		female	1	-34.3047	150.929					NSW	Austinmer	1962-04-20		A.K. Mallise	Australia							https://doi.org/10.3897/zookeys.908.47375	ANIC
preservedSpecimen		32-111762				Amegilla	bombiformis	Amegilla bombiformis (Smith, 1854)		female	1	-28.2159	153.556					NSW	Banora Pt Tweedheads	1964-02-15		G.M. Hoy	Australia							https://doi.org/10.3897/zookeys.908.47375	ANIC
preservedSpecimen		32-111715				Amegilla	preissi	Amegilla preissi (Cockerell, 1910)		female	1							WA	between Cape Town & Bonnybrook	1955-03-10		Snell	Australia							https://doi.org/10.3897/zookeys.908.47375	ANIC
preservedSpecimen		32-111695				Amegilla	rhodoscymna	Amegilla rhodoscymna (Cockerell, 1905)		male	1	-25.5918	150.018					QLD	Biggenden, Bluff Range	9-20/12/1972		H. Frauca	Australia							https://doi.org/10.3897/zookeys.908.47375	ANIC
preservedSpecimen		32-111696				Amegilla	rhodoscymna	Amegilla rhodoscymna (Cockerell, 1905)		male	1	-25.5918	150.018					QLD	Biggenden, Bluff Range	1-19/12/1971		H. Frauca	Australia							https://doi.org/10.3897/zookeys.908.47375	ANIC
preservedSpecimen		32-111697				Amegilla	rhodoscymna	Amegilla rhodoscymna (Cockerell, 1905)		male	1	-25.5918	150.018					QLD	Biggenden, Bluff Range	1-19/12/1971		H. Frauca	Australia							https://doi.org/10.3897/zookeys.908.47375	ANIC
preservedSpecimen		32-111698				Amegilla	rhodoscymna	Amegilla rhodoscymna (Cockerell, 1905)		female	1	-25.6	152.05					QLD	Biggenden, Bluff Range	1971-01-11		H. Frauca	Australia							https://doi.org/10.3897/zookeys.908.47375	ANIC
preservedSpecimen		32-111721				Amegilla	bombiformis	Amegilla bombiformis (Smith, 1854)		female	1	-25.5918	150.018					QLD	Biggenden, Bluff Range	1973-01-01		H. Frauca	Australia							https://doi.org/10.3897/zookeys.908.47375	ANIC
preservedSpecimen		32-111692				Amegilla	rhodoscymna	Amegilla rhodoscymna (Cockerell, 1905)		male	1	-25.5735	150.051					QLD	Biggenden, Mt Walsh, 2200ft.	1971-12-15		H. Frauca	Australia							https://doi.org/10.3897/zookeys.908.47375	ANIC
preservedSpecimen		32-111805				Amegilla	albigenella	Amegilla albigenella Michener, 1965		male	1	-31.2746	116.504					WA	Bolgart	1933-01-12			Australia							https://doi.org/10.3897/zookeys.908.47375	ANIC
preservedSpecimen		32-111886				Amegilla	flava	Amegilla flava (Friese, 1911)		female	1	-31.2663	116.501					WA	Bolgart	00/05/1909			Australia							https://doi.org/10.3897/zookeys.908.47375	ANIC		type rickae
preservedSpecimen		32-111718				Amegilla	frogatti	Amegilla froggatti (Cockerell, 1914)		female	1	-29.9611	146.861					NSW	Brewarrina	1905-03-28		W.W. Frogatt	Australia							https://doi.org/10.3897/zookeys.908.47375	ANIC
preservedSpecimen		32-111719				Amegilla	frogatti	Amegilla froggatti (Cockerell, 1914)		female	1	-29.9611	146.861					NSW	Brewarrina	1905-03-28		W.W. Frogatt	Australia							https://doi.org/10.3897/zookeys.908.47375	ANIC
preservedSpecimen		32-111720				Amegilla	frogatti	Amegilla froggatti (Cockerell, 1914)		male	1	-29.9611	146.861					NSW	Brewarrina	1905-03-28		W.W. Frogatt	Australia							https://doi.org/10.3897/zookeys.908.47375	ANIC
preservedSpecimen		32-111686				Amegilla	flava	Amegilla flava (Friese, 1911)		male	1	-27.4667	153.017					QLD	Brisbane	1923-03-03			Australia							https://doi.org/10.3897/zookeys.908.47375	ANIC
preservedSpecimen		32-111738				Amegilla	bombiformis	Amegilla bombiformis (Smith, 1854)		female	1	-27.4667	153.017					QLD	Brisbane	1965-12-05		R. Sands	Australia							https://doi.org/10.3897/zookeys.908.47375	ANIC
preservedSpecimen		32-111822				Amegilla	bombiformis	Amegilla bombiformis (Smith, 1854)		female	1	-27.4667	153.017					QLD	Brisbane				Australia							https://doi.org/10.3897/zookeys.908.47375	ANIC
preservedSpecimen		32-111860				Amegilla	bombiformis	Amegilla bombiformis (Smith, 1854)		male	1	-27.4667	153.017					QLD	Brisbane	1915-04-13		H. Hacker	Australia							https://doi.org/10.3897/zookeys.908.47375	ANIC
preservedSpecimen		32-111863				Amegilla	bombiformis	Amegilla bombiformis (Smith, 1854)		male	1	-27.4667	153.017					QLD	Brisbane	1915-04-13		H. Hacker	Australia							https://doi.org/10.3897/zookeys.908.47375	ANIC
preservedSpecimen		32-111728				Amegilla	bombiformis	Amegilla bombiformis (Smith, 1854)		male	1	-24.5494	151.366					Qld	Bulburin State Forest via Many Peaks	1974-04-14		S.R. Monteith	Australia							https://doi.org/10.3897/zookeys.908.47375	ANIC
preservedSpecimen		32-111741				Amegilla	bombiformis	Amegilla bombiformis (Smith, 1854)		male	1	-24.5494	151.366					Qld	Bulburin State Forest via Many Peaks	1974-04-14		S.R. Monteith	Australia							https://doi.org/10.3897/zookeys.908.47375	ANIC
preservedSpecimen		32-111724				Amegilla	bombiformis	Amegilla bombiformis (Smith, 1854)		female	1	-24.5494	151.366					Qld	Bulburin State Forest via Many Peaks, Forrest Sation	1972-04-05		S.R. Monteith	Australia							https://doi.org/10.3897/zookeys.908.47375	ANIC
preservedSpecimen		32-111716				Amegilla	preissi	Amegilla preissi (Cockerell, 1910)		male	1	-33.3656	115.64					WA	Bunbury	1954-02-18			Australia							https://doi.org/10.3897/zookeys.908.47375	ANIC
preservedSpecimen		32-111691				Amegilla	rhodoscymna	Amegilla rhodoscymna (Cockerell, 1905)		male	1	-24.87	152.37					Qld	Bundaberg E., Baldwin Swamp	1958-04-20		H. Frauca	Australia							https://doi.org/10.3897/zookeys.908.47375	ANIC
preservedSpecimen		32-111839				Amegilla	bombiformis	Amegilla bombiformis (Smith, 1854)		male	1	-26.8333	151.549					QLD	Bunya Mrs	1926-01-08		E.O. Dummigan	Australia							https://doi.org/10.3897/zookeys.908.47375	ANIC
preservedSpecimen		32-111757				Amegilla	bombiformis	Amegilla bombiformis (Smith, 1854)		female	1	-28.1003	153.447					QLD	Burleigh Hds NP	1962-04-01		L. Sinclair	Australia							https://doi.org/10.3897/zookeys.908.47375	ANIC
preservedSpecimen		32-111759				Amegilla	bombiformis	Amegilla bombiformis (Smith, 1854)		female	1	-28.1003	153.447					QLD	Burleigh Hds NP	1962-04-01		L. Sinclair	Australia							https://doi.org/10.3897/zookeys.908.47375	ANIC
preservedSpecimen		32-111881				Amegilla	epaphrodita	Amegilla epaphrodita Brooks, 1988		female	1	-13.4666	131.416					NT	Burnside Brocks Creek	1932-02-14		T.G. Campbell	Australia							https://doi.org/10.3897/zookeys.908.47375	ANIC		Paratype
preservedSpecimen		32-111882				Amegilla	epaphrodita	Amegilla epaphrodita Brooks, 1988		female	1	-13.4666	131.416					NT	Burnside Brocks Creek	1932-02-14		T.G. Campbell	Australia							https://doi.org/10.3897/zookeys.908.47375	ANIC		Paratype
preservedSpecimen		32-111883				Amegilla	epaphrodita	Amegilla epaphrodita Brooks, 1988		female	1	-13.4666	131.416					NT	Burnside Brocks Creek	1932-02-15		T.G. Campbell	Australia							https://doi.org/10.3897/zookeys.908.47375	ANIC		Paratype
preservedSpecimen		32-111796				Amegilla	crenata n.sp.	Amegilla crenata Leijs, 2020		female	1	-13.4666	131.416					NT	Burnside St Brocks Creek	1932-01-14		T.G. Campbell	Australia							https://doi.org/10.3897/zookeys.908.47375	ANIC
preservedSpecimen		32-111817				Amegilla	bombiformis	Amegilla bombiformis (Smith, 1854)		female	1	-28.439	153.481					NSW	Burringbar	1957-03-12		P. Holland	Australia							https://doi.org/10.3897/zookeys.908.47375	ANIC
preservedSpecimen		32-111736				Amegilla	bombiformis	Amegilla bombiformis (Smith, 1854)		female	1	-35.2919	149.069					ACT	Canberra				Australia							https://doi.org/10.3897/zookeys.908.47375	ANIC
preservedSpecimen		32-111827				Amegilla	rhodoscymna	Amegilla rhodoscymna (Cockerell, 1905)		male	1							QLD	Cape York	1911-01-01		Elgner	Australia							https://doi.org/10.3897/zookeys.908.47375	ANIC
preservedSpecimen		32-111683				Amegilla	dawsoni	Amegilla dawsoni (Rayment, 1951)		female	1	-24.8913	113.658					WA	Carnarvon	1954-09-10			Australia							https://doi.org/10.3897/zookeys.908.47375	ANIC
preservedSpecimen		32-111684				Amegilla	dawsoni	Amegilla dawsoni (Rayment, 1951)		male	1	-24.8913	113.658					WA	Carnarvon	1954-09-11			Australia							https://doi.org/10.3897/zookeys.908.47375	ANIC
preservedSpecimen		32-111750				Amegilla	dawsoni	Amegilla dawsoni (Rayment, 1951)		female	1	-24.8913	113.658					WA	Carnarvon	1980-04-05		K. & E. Carnaby	Australia							https://doi.org/10.3897/zookeys.908.47375	ANIC
preservedSpecimen		32-111765				Amegilla	bombiformis	Amegilla bombiformis (Smith, 1854)		female	1	-28.8664	153.051					NSW	Casino	1969-04-10		C.W. Frazier	Australia							https://doi.org/10.3897/zookeys.908.47375	ANIC
preservedSpecimen		32-111797				Amegilla	crenata n.sp.	Amegilla crenata Leijs, 2020		male	1	-16.3667	125.2					WA	Charnley River, 2 km SW Rolly Hill, CALM site	1988-06-20		I.D. Naumann	Australia							https://doi.org/10.3897/zookeys.908.47375	ANIC
preservedSpecimen		32-111707				Amegilla	calva	Amegilla calva (Rayment, 1935)		male	1	-29.6145	142.565					VIC	Clifton Downs	1949-10-31		E.F. Riek	Australia							https://doi.org/10.3897/zookeys.908.47375	ANIC
preservedSpecimen		32-111708				Amegilla	calva	Amegilla calva (Rayment, 1935)		male	1	-29.6145	142.565					VIC	Clifton Downs	1949-10-31		E.F. Riek	Australia							https://doi.org/10.3897/zookeys.908.47375	ANIC
preservedSpecimen		32-111709				Amegilla	calva	Amegilla calva (Rayment, 1935)		female	1	-29.6145	142.565					VIC	Clifton Downs	1949-10-31		E.F. Riek	Australia							https://doi.org/10.3897/zookeys.908.47375	ANIC
preservedSpecimen		32-111710				Amegilla	calva	Amegilla calva (Rayment, 1935)		female	1	-29.6145	142.565					VIC	Clifton Downs	1949-10-31		E.F. Riek	Australia							https://doi.org/10.3897/zookeys.908.47375	ANIC
preservedSpecimen		32-111844				Amegilla	bombiformis	Amegilla bombiformis (Smith, 1854)		male	1	-33.7336	151.299					NSW	Collaroy	1928-03-02		M. Fuller	Australia							https://doi.org/10.3897/zookeys.908.47375	ANIC
preservedSpecimen		32-111861				Amegilla	bombiformis	Amegilla bombiformis (Smith, 1854)		male	1	-33.7336	151.299					NSW	Collaroy	1958-12-31		K.R. Norris	Australia							https://doi.org/10.3897/zookeys.908.47375	ANIC
preservedSpecimen		32-111865				Amegilla	bombiformis	Amegilla bombiformis (Smith, 1854)		male	1	-33.7336	151.299					NSW	Collaroy	1958-12-31		K.R. Norris	Australia							https://doi.org/10.3897/zookeys.908.47375	ANIC
preservedSpecimen		32-111812				Amegilla	bombiformis	Amegilla bombiformis (Smith, 1854)		female	1	-34	151.07					NSW	Como	1940-04-04			Australia							https://doi.org/10.3897/zookeys.908.47375	ANIC
preservedSpecimen		32-111770				Amegilla	bombiformis	Amegilla bombiformis (Smith, 1854)		female	1	-35.9667	150.15					NSW	Congo, 8km SE by E of Moruya	1984-02-17		M.S. Upton	Australia							https://doi.org/10.3897/zookeys.908.47375	ANIC
preservedSpecimen		32-111889				Amegilla	calva	Amegilla calva (Rayment, 1935)		female	1	-32.17	151.15					NSW	Davis Creek	1931-12-02		F.H. Macartney	Australia							https://doi.org/10.3897/zookeys.908.47375	ANIC
preservedSpecimen		32-111890				Amegilla	calva	Amegilla calva (Rayment, 1935)		female	1	-32.17	151.15					NSW	Davis Creek	1931-12-02		F.H. Macartney	Australia							https://doi.org/10.3897/zookeys.908.47375	ANIC
preservedSpecimen		32-111688				Amegilla	flava	Amegilla flava (Friese, 1911)		female	1	-31.0833	120.7					WA	Dedari, 54-553			A. Douglas	Australia							https://doi.org/10.3897/zookeys.908.47375	ANIC
preservedSpecimen		32-111689				Amegilla	flava	Amegilla flava (Friese, 1911)		female	1	-31.0833	120.7					WA	Dedari, 54-554			A. Douglas	Australia							https://doi.org/10.3897/zookeys.908.47375	ANIC
preservedSpecimen		32-111687				Amegilla	flava	Amegilla flava (Friese, 1911)		female	1	-31.0833	120.7					WA	Dedari, 54-555			A. Douglas	Australia							https://doi.org/10.3897/zookeys.908.47375	ANIC
preservedSpecimen		32-111793				Amegilla	rhodoscymna	Amegilla rhodoscymna (Cockerell, 1905)		female	1	-23.7164	149.851					QLD	Edungalba	1941-01-12			Australia							https://doi.org/10.3897/zookeys.908.47375	ANIC
preservedSpecimen		32-111693				Amegilla	rhodoscymna	Amegilla rhodoscymna (Cockerell, 1905)		female	1	-25.3664	151.133					Qld	Eidsvold				Australia							https://doi.org/10.3897/zookeys.908.47375	ANIC
preservedSpecimen		32-111749				Amegilla	dawsoni	Amegilla dawsoni (Rayment, 1951)		male	1	-21.9336	114.134					WA	Exmouth	1975-08-13		K. & E. Carnaby	Australia							https://doi.org/10.3897/zookeys.908.47375	ANIC
preservedSpecimen		32-111761				Amegilla	bombiformis	Amegilla bombiformis (Smith, 1854)		female	1							NSW	Falconbridge	1964-04-10		C.W. Frazier	Australia							https://doi.org/10.3897/zookeys.908.47375	ANIC
preservedSpecimen		32-111851				Amegilla	bombiformis	Amegilla bombiformis (Smith, 1854)		female	1	-18.8369	145.887					QLD	Forrestry Rd 22 mls SW Ingham	1961-04-21		R. Straatman	Australia							https://doi.org/10.3897/zookeys.908.47375	ANIC
preservedSpecimen		32-111854				Amegilla	bombiformis	Amegilla bombiformis (Smith, 1854)		female	1	-18.8369	145.887					QLD	Forrestry Rd 22 mls SW Ingham	1961-04-21		R. Straatman	Australia							https://doi.org/10.3897/zookeys.908.47375	ANIC
preservedSpecimen		32-111855				Amegilla	bombiformis	Amegilla bombiformis (Smith, 1854)		female	1	-18.8369	145.887					QLD	Forrestry Rd 22 mls SW Ingham	1961-04-21		R. Straatman	Australia							https://doi.org/10.3897/zookeys.908.47375	ANIC
preservedSpecimen		32-111856				Amegilla	bombiformis	Amegilla bombiformis (Smith, 1854)		female	1	-18.8369	145.887					QLD	Forrestry Rd 22 mls SW Ingham	1961-04-21		R. Straatman	Australia							https://doi.org/10.3897/zookeys.908.47375	ANIC
preservedSpecimen		32-111756				Amegilla	bombiformis	Amegilla bombiformis (Smith, 1854)		female	1								French Hill	1902-03-10		L.J. Aldous	Australia							https://doi.org/10.3897/zookeys.908.47375	ANIC
preservedSpecimen		32-111884				Amegilla	preissi	Amegilla preissi (Cockerell, 1910)		male	1	-28.78	114.613					WA	Geraldton			L.J.Newman	Australia							https://doi.org/10.3897/zookeys.908.47375	ANIC
preservedSpecimen		32-111888				Amegilla	preissi	Amegilla preissi (Cockerell, 1910)		female	1	-28.78	114.613					WA	Geraldton				Australia							https://doi.org/10.3897/zookeys.908.47375	ANIC
preservedSpecimen		32-111803				Amegilla	preissi	Amegilla preissi (Cockerell, 1910)		female	1	-32.0827	115.999					WA	Gosnells	February		Handrenartha(?)	Australia							https://doi.org/10.3897/zookeys.908.47375	ANIC
preservedSpecimen		32-111847				Amegilla	bombiformis	Amegilla bombiformis (Smith, 1854)		female	1	-29.6822	152.933					NSW	Grafton			B.C. Law	Australia							https://doi.org/10.3897/zookeys.908.47375	ANIC
preservedSpecimen		32-111789				Amegilla	rhodoscymna	Amegilla rhodoscymna (Cockerell, 1905)		female	1	-11.75	142.583					QLD	Heathlands	1992-03-21		P. Feehney	Australia							https://doi.org/10.3897/zookeys.908.47375	ANIC
preservedSpecimen		32-111775				Amegilla	bombiformis	Amegilla bombiformis (Smith, 1854)		female	1	-17.38	145.39					QLD	Herberton	1993-12-08		T. Woodger	Australia							https://doi.org/10.3897/zookeys.908.47375	ANIC
preservedSpecimen		32-111722				Amegilla	bombiformis	Amegilla bombiformis (Smith, 1854)		male	1	33.833	151.141					NSW	Hunters Hill	1940-03-20			Australia							https://doi.org/10.3897/zookeys.908.47375	ANIC
preservedSpecimen		32-111781				Amegilla	bombiformis	Amegilla bombiformis (Smith, 1854)		male	1	33.833	151.141					NSW	Hunters Hill	1940-03-20			Australia							https://doi.org/10.3897/zookeys.908.47375	ANIC
preservedSpecimen		32-111787				Amegilla	bombiformis	Amegilla bombiformis (Smith, 1854)		male	1	33.833	151.141					NSW	Hunters Hill	1940-03-20			Australia							https://doi.org/10.3897/zookeys.908.47375	ANIC
preservedSpecimen		32-111807				Amegilla	bombiformis	Amegilla bombiformis (Smith, 1854)		male	1	33.833	151.141					NSW	Hunters Hill	1940-03-20			Australia							https://doi.org/10.3897/zookeys.908.47375	ANIC
preservedSpecimen		32-111818				Amegilla	bombiformis	Amegilla bombiformis (Smith, 1854)		male	1	33.833	151.141					NSW	Hunters Hill	1940-03-20			Australia							https://doi.org/10.3897/zookeys.908.47375	ANIC
preservedSpecimen		32-111852				Amegilla	bombiformis	Amegilla bombiformis (Smith, 1854)		male	1	33.833	151.141					NSW	Hunters Hill	1940-03-20			Australia							https://doi.org/10.3897/zookeys.908.47375	ANIC
preservedSpecimen		32-111853				Amegilla	bombiformis	Amegilla bombiformis (Smith, 1854)		male	1	33.833	151.141					NSW	Hunters Hill	1940-03-20			Australia							https://doi.org/10.3897/zookeys.908.47375	ANIC
preservedSpecimen		32-111780				Amegilla	bombiformis	Amegilla bombiformis (Smith, 1854)		female	1	-16.6055	145.344					QLD	Julatten	1987-01-08		H. Howden & R. Storey	Australia							https://doi.org/10.3897/zookeys.908.47375	ANIC
preservedSpecimen		32-111838				Amegilla	bombiformis	Amegilla bombiformis (Smith, 1854)		male	1	-33.765	151.163					NSW	Killara	1936-01-25		M.F. Day	Australia							https://doi.org/10.3897/zookeys.908.47375	ANIC
preservedSpecimen		32-111837				Amegilla	bombiformis	Amegilla bombiformis (Smith, 1854)		male	1	-28.3362	152.293					NSW	Killarney	1922-01-12		E.O. Dummigan	Australia							https://doi.org/10.3897/zookeys.908.47375	ANIC
preservedSpecimen		32-111743				Amegilla	scoparia n.sp.	Amegilla scoparia Leijs, 2020		male	1	-33.1877	118.083					WA	Kukerin			A. Douglas	Australia							https://doi.org/10.3897/zookeys.908.47375	ANIC
preservedSpecimen		32-111753				Amegilla	bombiformis	Amegilla bombiformis (Smith, 1854)		female	1	-16.8167	145.6					QLD	Kuranda	1965-04-24		C.W. Frazier	Australia							https://doi.org/10.3897/zookeys.908.47375	ANIC
preservedSpecimen		32-111771				Amegilla	bombiformis	Amegilla bombiformis (Smith, 1854)		male	1	-33.78	151.17					NSW	Lindfield	1983-02-26		M. Stevens	Australia							https://doi.org/10.3897/zookeys.908.47375	ANIC
preservedSpecimen		32-111725				Amegilla	bombiformis	Amegilla bombiformis (Smith, 1854)		female	1	-28.8167	153.267					NSW	Lismore	1940-02-20			Australia							https://doi.org/10.3897/zookeys.908.47375	ANIC
preservedSpecimen		32-111726				Amegilla	bombiformis	Amegilla bombiformis (Smith, 1854)		female	1	-28.8167	153.267					NSW	Lismore	1942-02-20			Australia							https://doi.org/10.3897/zookeys.908.47375	ANIC
preservedSpecimen		32-111727				Amegilla	bombiformis	Amegilla bombiformis (Smith, 1854)		female	1	-28.8167	153.267					NSW	Lismore	1940-03-01			Australia							https://doi.org/10.3897/zookeys.908.47375	ANIC
preservedSpecimen		32-111730				Amegilla	bombiformis	Amegilla bombiformis (Smith, 1854)		female	1	-28.8167	153.267					NSW	Lismore	1941-01-19			Australia							https://doi.org/10.3897/zookeys.908.47375	ANIC
preservedSpecimen		32-111732				Amegilla	bombiformis	Amegilla bombiformis (Smith, 1854)		female	1	-28.8167	153.267					NSW	Lismore	1940-03-01			Australia							https://doi.org/10.3897/zookeys.908.47375	ANIC
preservedSpecimen		32-111733				Amegilla	bombiformis	Amegilla bombiformis (Smith, 1854)		female	1	-28.8167	153.267					NSW	Lismore	1942-02-20			Australia							https://doi.org/10.3897/zookeys.908.47375	ANIC
preservedSpecimen		32-111734				Amegilla	bombiformis	Amegilla bombiformis (Smith, 1854)		male	1	-28.8167	153.267					NSW	Lismore	1942-05-20			Australia							https://doi.org/10.3897/zookeys.908.47375	ANIC
preservedSpecimen		32-111782				Amegilla	bombiformis	Amegilla bombiformis (Smith, 1854)		male	1	-28.8167	153.267					NSW	Lismore	1942-01-10			Australia							https://doi.org/10.3897/zookeys.908.47375	ANIC
preservedSpecimen		32-111783				Amegilla	bombiformis	Amegilla bombiformis (Smith, 1854)		male	1	-28.8167	153.267					NSW	Lismore	1940-03-01			Australia							https://doi.org/10.3897/zookeys.908.47375	ANIC
preservedSpecimen		32-111809				Amegilla	bombiformis	Amegilla bombiformis (Smith, 1854)		male	1	-28.8167	153.267					NSW	Lismore	1940-03-01			Australia							https://doi.org/10.3897/zookeys.908.47375	ANIC
preservedSpecimen		32-111811				Amegilla	bombiformis	Amegilla bombiformis (Smith, 1854)		female	1	-28.8167	153.267					NSW	Lismore	1940-03-01			Australia							https://doi.org/10.3897/zookeys.908.47375	ANIC
preservedSpecimen		32-111813				Amegilla	bombiformis	Amegilla bombiformis (Smith, 1854)		male	1	-28.8167	153.267					NSW	Lismore	1940-03-01			Australia							https://doi.org/10.3897/zookeys.908.47375	ANIC
preservedSpecimen		32-111819				Amegilla	bombiformis	Amegilla bombiformis (Smith, 1854)		female	1	-28.8167	153.267					NSW	Lismore	1940-01-04			Australia							https://doi.org/10.3897/zookeys.908.47375	ANIC
preservedSpecimen		32-111823				Amegilla	bombiformis	Amegilla bombiformis (Smith, 1854)		female	1	-28.8167	153.267					NSW	Lismore	1940-03-01			Australia							https://doi.org/10.3897/zookeys.908.47375	ANIC
preservedSpecimen		32-111824				Amegilla	bombiformis	Amegilla bombiformis (Smith, 1854)		male	1	-28.8167	153.267					NSW	Lismore	1940-03-01			Australia							https://doi.org/10.3897/zookeys.908.47375	ANIC
preservedSpecimen		32-111840				Amegilla	bombiformis	Amegilla bombiformis (Smith, 1854)		female	1	-28.8167	153.267					NSW	Lismore	1940-03-01			Australia							https://doi.org/10.3897/zookeys.908.47375	ANIC
preservedSpecimen		32-111841				Amegilla	bombiformis	Amegilla bombiformis (Smith, 1854)		female	1	-28.8167	153.267					NSW	Lismore	1940-02-20			Australia							https://doi.org/10.3897/zookeys.908.47375	ANIC
preservedSpecimen		32-111842				Amegilla	bombiformis	Amegilla bombiformis (Smith, 1854)		female	1	-28.8167	153.267					NSW	Lismore	1940-03-01			Australia							https://doi.org/10.3897/zookeys.908.47375	ANIC
preservedSpecimen		32-111862				Amegilla	bombiformis	Amegilla bombiformis (Smith, 1854)		male	1	-28.8167	153.267					NSW	Lismore	1940-02-20			Australia							https://doi.org/10.3897/zookeys.908.47375	ANIC
preservedSpecimen		32-111700				Amegilla	rhodoscymna	Amegilla rhodoscymna (Cockerell, 1905)		female	1	-21.1288	149.189					Qld	Mackay			W.W. Frogatt	Australia							https://doi.org/10.3897/zookeys.908.47375	ANIC
preservedSpecimen		32-111784				Amegilla	bombiformis	Amegilla bombiformis (Smith, 1854)		male	1	-19.15	146.867					QLD	Magnetic Isl	1946-05-04			Australia							https://doi.org/10.3897/zookeys.908.47375	ANIC
preservedSpecimen		32-111808				Amegilla	bombiformis	Amegilla bombiformis (Smith, 1854)		female	1	-19.15	146.867					QLD	Magnetic Isl	1946-05-04			Australia							https://doi.org/10.3897/zookeys.908.47375	ANIC
preservedSpecimen		32-111810				Amegilla	bombiformis	Amegilla bombiformis (Smith, 1854)		female	1	-19.15	146.867					QLD	Magnetic Isl	1946-05-04			Australia							https://doi.org/10.3897/zookeys.908.47375	ANIC
preservedSpecimen		32-111790				Amegilla	rhodoscymna	Amegilla rhodoscymna (Cockerell, 1905)		female	1	-19.15	146.867					QLD	Magnetic Isl, Arcadia	1998-10-06		R.W. Matthews	Australia							https://doi.org/10.3897/zookeys.908.47375	ANIC
preservedSpecimen		32-111801				Amegilla	albiceps	Amegilla albiceps (Rayment, 1951)		male	1	-35.0494	142.884					VIC	Manangatang	1933-03-10			Australia							https://doi.org/10.3897/zookeys.908.47375	ANIC
preservedSpecimen		32-111859				Amegilla	bombiformis	Amegilla bombiformis (Smith, 1854)		male	1	-33.912	151.16						Marrickville			Whiteley	Australia							https://doi.org/10.3897/zookeys.908.47375	ANIC
preservedSpecimen		32-111751				Amegilla	dawsoni	Amegilla dawsoni (Rayment, 1951)		female	1	-27.7666	114.684					WA	Mary Springs	1974-08-26		K. & E. Carnaby	Australia							https://doi.org/10.3897/zookeys.908.47375	ANIC
preservedSpecimen		32-111747				Amegilla	dawsoni	Amegilla dawsoni (Rayment, 1951)		female	1	-26.3731	117.335					WA	Mileura Station, NW of Cue	1966-09-21		S.J.J.F. Davies	Australia							https://doi.org/10.3897/zookeys.908.47375	ANIC
preservedSpecimen		32-111778				Amegilla	bombiformis	Amegilla bombiformis (Smith, 1854)		female	1	-17.8333	146.1					QLD	Mission Beach	1996-01-29		M. Cermak	Australia							https://doi.org/10.3897/zookeys.908.47375	ANIC
preservedSpecimen		32-111815				Amegilla	bombiformis	Amegilla bombiformis (Smith, 1854)		male	1	-15.7833	145.283					QLD	Moses Ck 4km NbyE Mt Finnigan	1980-10-16		J.C. Cardale	Australia							https://doi.org/10.3897/zookeys.908.47375	ANIC
preservedSpecimen		32-111768				Amegilla	bombiformis	Amegilla bombiformis (Smith, 1854)		male	1	-27.9667	153.2					QLD	Mt Tamborine	1960-02-27		C.W. Frazier	Australia							https://doi.org/10.3897/zookeys.908.47375	ANIC
preservedSpecimen		32-111769				Amegilla	bombiformis	Amegilla bombiformis (Smith, 1854)		male	1	-27.9667	153.2					QLD	Mt Tamborine	1960-02-28		C.W. Frazier	Australia							https://doi.org/10.3897/zookeys.908.47375	ANIC
preservedSpecimen		32-111816				Amegilla	bombiformis	Amegilla bombiformis (Smith, 1854)		male	1	-25.5735	150.051					QLD	Mt Walsh NP nr Biggenden	1979-11-24		H. Frauca	Australia							https://doi.org/10.3897/zookeys.908.47375	ANIC
preservedSpecimen		32-111791				Amegilla	rhodoscymna	Amegilla rhodoscymna (Cockerell, 1905)		female	1	-25.5735	152.051					QLD	Mt Walsh NP via Biggenden	1980-02-01		H. Frauca	Australia							https://doi.org/10.3897/zookeys.908.47375	ANIC
preservedSpecimen		32-111829				Amegilla	rhodoscymna	Amegilla rhodoscymna (Cockerell, 1905)		male	1	-25.5601	152.055					QLD	N slope Bluff Ra. Biggenden	1973-12-16		H. Frauca	Australia							https://doi.org/10.3897/zookeys.908.47375	ANIC
preservedSpecimen		32-111850				Amegilla	bombiformis	Amegilla bombiformis (Smith, 1854)		female	1								N. Guinea (?)	1921-02-01		G. Mussing (?)	Australia							https://doi.org/10.3897/zookeys.908.47375	ANIC
preservedSpecimen		32-111845				Amegilla	bombiformis	Amegilla bombiformis (Smith, 1854)		female	1							NSW	National Park	1928-02-14		Mackerras	Australia							https://doi.org/10.3897/zookeys.908.47375	ANIC
preservedSpecimen		32-111712				Amegilla	calva	Amegilla calva (Rayment, 1935)		male	1	-27.8128	142.589					Qld	near Noccundra	1949-11-10		S.J. Paramonov	Australia							https://doi.org/10.3897/zookeys.908.47375	ANIC
preservedSpecimen		32-111713				Amegilla	calva	Amegilla calva (Rayment, 1935)		female	1	-27.8128	142.589					Qld	near Noccundra	1949-11-10		S.J. Paramonov	Australia							https://doi.org/10.3897/zookeys.908.47375	ANIC
preservedSpecimen		32-111699				Amegilla	rhodoscymna	Amegilla rhodoscymna (Cockerell, 1905)		female	1								no locality data			W.W. Frogatt	Australia							https://doi.org/10.3897/zookeys.908.47375	ANIC
preservedSpecimen		32-111729				Amegilla	bombiformis	Amegilla bombiformis (Smith, 1854)		male	1								no locality data				Australia							https://doi.org/10.3897/zookeys.908.47375	ANIC
preservedSpecimen		32-111731				Amegilla	bombiformis	Amegilla bombiformis (Smith, 1854)		male	1								no locality data				Australia							https://doi.org/10.3897/zookeys.908.47375	ANIC
preservedSpecimen		32-111737				Amegilla	bombiformis	Amegilla bombiformis (Smith, 1854)		female	1								no locality data				Australia							https://doi.org/10.3897/zookeys.908.47375	ANIC
preservedSpecimen		32-111739				Amegilla	bombiformis	Amegilla bombiformis (Smith, 1854)		male	1								no locality data				Australia							https://doi.org/10.3897/zookeys.908.47375	ANIC
preservedSpecimen		32-111740				Amegilla	bombiformis	Amegilla bombiformis (Smith, 1854)		female	1								no locality data				Australia							https://doi.org/10.3897/zookeys.908.47375	ANIC
preservedSpecimen		32-111754				Amegilla	bombiformis	Amegilla bombiformis (Smith, 1854)		female	1								no locality data	1964-03-30		L.R. McIlwain	Australia							https://doi.org/10.3897/zookeys.908.47375	ANIC
preservedSpecimen		32-111773				Amegilla	bombiformis	Amegilla bombiformis (Smith, 1854)		male	1								no locality data				Australia							https://doi.org/10.3897/zookeys.908.47375	ANIC
preservedSpecimen		32-111785				Amegilla	bombiformis	Amegilla bombiformis (Smith, 1854)		female	1								no locality data				Australia							https://doi.org/10.3897/zookeys.908.47375	ANIC
preservedSpecimen		32-111834				Amegilla	rhodoscymna	Amegilla rhodoscymna (Cockerell, 1905)		female	1								no locality data				Australia							https://doi.org/10.3897/zookeys.908.47375	ANIC
preservedSpecimen		32-111835				Amegilla	rhodoscymna	Amegilla rhodoscymna (Cockerell, 1905)		male	1								no locality data				Australia							https://doi.org/10.3897/zookeys.908.47375	ANIC
preservedSpecimen		32-111843				Amegilla	bombiformis	Amegilla bombiformis (Smith, 1854)		female	1								no locality data				Australia							https://doi.org/10.3897/zookeys.908.47375	ANIC
preservedSpecimen		32-111798				Amegilla	crenata n.sp.	Amegilla crenata Leijs, 2020		male	1	-12.85	132.8					NT	Nourlangie Rk, Kakadu NP	1999-05-20		R. Matthews	Australia							https://doi.org/10.3897/zookeys.908.47375	ANIC
preservedSpecimen		32-111799				Amegilla	crenata n.sp.	Amegilla crenata Leijs, 2020		male	1	-12.85	132.8					NT	Nourlangie Rk, Kakadu NP	1999-05-20		R. Matthews	Australia							https://doi.org/10.3897/zookeys.908.47375	ANIC
preservedSpecimen		32-111677				Amegilla	dawsoni	Amegilla dawsoni (Rayment, 1951)		male	1	-22.4357	115.112					WA	Onslow	1944-08-02		O. Dawson	Australia							https://doi.org/10.3897/zookeys.908.47375	ANIC
preservedSpecimen		32-111680				Amegilla	dawsoni	Amegilla dawsoni (Rayment, 1951)		male	1	-22.4357	115.112					WA	Onslow	1944-08-02		O. Dawson	Australia							https://doi.org/10.3897/zookeys.908.47375	ANIC
preservedSpecimen		32-111682				Amegilla	dawsoni	Amegilla dawsoni (Rayment, 1951)		male	1	-22.4357	115.112					WA	Onslow	1944-08-02		O. Dawson	Australia							https://doi.org/10.3897/zookeys.908.47375	ANIC
preservedSpecimen		32-111800				Amegilla	albiceps	Amegilla albiceps (Rayment, 1951)		male	1	-31.35	138.7					SA	Oraparinna Ck Dingly Dell camp	1987-11-10		I. Naumann & J. Cardale	Australia							https://doi.org/10.3897/zookeys.908.47375	ANIC
preservedSpecimen		32-111706				Amegilla	calva	Amegilla calva (Rayment, 1935)		male	1	-30.5784	141.976					VIC	Pack Saddle Mt	1949-11-18		E.F. Riek	Australia							https://doi.org/10.3897/zookeys.908.47375	ANIC
preservedSpecimen		32-111836				Amegilla	bombiformis	Amegilla bombiformis (Smith, 1854)		female	1							QLD	Palm Isl.			M.J. Mackerras	Australia							https://doi.org/10.3897/zookeys.908.47375	ANIC
preservedSpecimen		32-111814				Amegilla	bombiformis	Amegilla bombiformis (Smith, 1854)		female	1	-19	146.2					QLD	Paluma	1971-01-21		D.W. Frith	Australia							https://doi.org/10.3897/zookeys.908.47375	ANIC
preservedSpecimen		32-111735				Amegilla	bombiformis	Amegilla bombiformis (Smith, 1854)		female	1							NSW	Paramatta	1933-02-01		N.A. Hall	Australia							https://doi.org/10.3897/zookeys.908.47375	ANIC
preservedSpecimen		32-111794				Amegilla	scoparia n.sp.	Amegilla scoparia Leijs, 2020		female	1							WA	Pinjarra			Goerling collection	Australia							https://doi.org/10.3897/zookeys.908.47375	ANIC
preservedSpecimen		32-111802				Amegilla	flava	Amegilla flava (Friese, 1911)		male	1	-32.6344	115.881					WA	Pinjarra			Goerling collection	Australia							https://doi.org/10.3897/zookeys.908.47375	ANIC
preservedSpecimen		32-111831				Amegilla	rhodoscymna	Amegilla rhodoscymna (Cockerell, 1905)		female	1	-13.2181	142.849					QLD	Pinnacle Ck 27 km N of Archer crossing	1975-06-29		G. Monteith	Australia							https://doi.org/10.3897/zookeys.908.47375	ANIC
preservedSpecimen		32-111849				Amegilla	bombiformis	Amegilla bombiformis (Smith, 1854)		female	1	-31.45	152.917					NSW	Port Macquarie	1958-03-11		I.F.B. Common	Australia							https://doi.org/10.3897/zookeys.908.47375	ANIC
preservedSpecimen		32-111864				Amegilla	bombiformis	Amegilla bombiformis (Smith, 1854)		female	1	-31.45	152.917					NSW	Port Macquarie	1958-03-11		I.F.B. Common	Australia							https://doi.org/10.3897/zookeys.908.47375	ANIC
preservedSpecimen		32-111786				Amegilla	bombiformis	Amegilla bombiformis (Smith, 1854)		female	1							NSW	Robertson	1940-03-09			Australia							https://doi.org/10.3897/zookeys.908.47375	ANIC
preservedSpecimen		32-111792				Amegilla	rhodoscymna	Amegilla rhodoscymna (Cockerell, 1905)		female	1	-25.6395	152.089					QLD	Rockpool Gorge Bluff Rg via Biggenden	1975-03-21		H. Frauca	Australia							https://doi.org/10.3897/zookeys.908.47375	ANIC
preservedSpecimen		32-111830				Amegilla	rhodoscymna	Amegilla rhodoscymna (Cockerell, 1905)		male	1	-25.6395	152.089					QLD	Rockpool Gorge Bluff Rg via Biggenden	1977-01-13		H. Frauca	Australia							https://doi.org/10.3897/zookeys.908.47375	ANIC
preservedSpecimen		32-111690				Amegilla	flava	Amegilla flava (Friese, 1911)		male	1	-32.9813	121.643					WA	Salmon Gums, 44-60				Australia							https://doi.org/10.3897/zookeys.908.47375	ANIC
preservedSpecimen		32-111764				Amegilla	bombiformis	Amegilla bombiformis (Smith, 1854)		female	1							NSW	Sawtell (?)	1966-04-11		C.W. Frazier	Australia							https://doi.org/10.3897/zookeys.908.47375	ANIC
preservedSpecimen		32-111766				Amegilla	bombiformis	Amegilla bombiformis (Smith, 1854)		female	1							NSW	Sawtell (?)	1966-04-11		C.W. Frazier	Australia							https://doi.org/10.3897/zookeys.908.47375	ANIC
preservedSpecimen		32-111878				Amegilla	epaphrodita	Amegilla epaphrodita Brooks, 1988		male	1	-15.39	144.31					QLD	Split Rock	1994-01-17		P. Zborowski & E.D. Edwards	Australia							https://doi.org/10.3897/zookeys.908.47375	ANIC		allotype(to be)
preservedSpecimen		32-111879				Amegilla	epaphrodita	Amegilla epaphrodita Brooks, 1988		male	1	-15.39	144.31					QLD	Split Rock	1994-01-18		P. Zborowski & E.D. Edwards	Australia							https://doi.org/10.3897/zookeys.908.47375	ANIC
preservedSpecimen		32-111758				Amegilla	bombiformis	Amegilla bombiformis (Smith, 1854)		female	1							QLD	St Bernard's Mt Tamborine	31/1//1961		C.W. Frazier	Australia							https://doi.org/10.3897/zookeys.908.47375	ANIC
preservedSpecimen		32-111832				Amegilla	rhodoscymna	Amegilla rhodoscymna (Cockerell, 1905)		male	1	-25.5744	152.05					QLD	Summit Mt Walsh	1996-12-11		H. Frauca	Australia							https://doi.org/10.3897/zookeys.908.47375	ANIC
preservedSpecimen		32-111493				Amegilla	preissi	Amegilla preissi (Cockerell, 1910)		male	1	-31.9453	115.898					WA	Swan River			L.J. Newman	Australia							https://doi.org/10.3897/zookeys.908.47375	ANIC
preservedSpecimen		32-111804				Amegilla	preissi	Amegilla preissi (Cockerell, 1910)		male	1	-31.9453	115.898					WA	Swan River			L.J. Newman	Australia							https://doi.org/10.3897/zookeys.908.47375	ANIC
preservedSpecimen		32-111806				Amegilla	bombiformis	Amegilla bombiformis (Smith, 1854)		male	1	-33.8652	151.21					NSW	Sydney	1931-01-06			Australia							https://doi.org/10.3897/zookeys.908.47375	ANIC
preservedSpecimen		32-111820				Amegilla	bombiformis	Amegilla bombiformis (Smith, 1854)		male	1	-33.8652	151.21					NSW	Sydney	1931-01-06			Australia							https://doi.org/10.3897/zookeys.908.47375	ANIC
preservedSpecimen		32-111821				Amegilla	bombiformis	Amegilla bombiformis (Smith, 1854)		female	1	-33.8652	151.21					NSW	Sydney				Australia							https://doi.org/10.3897/zookeys.908.47375	ANIC
preservedSpecimen		32-111848				Amegilla	bombiformis	Amegilla bombiformis (Smith, 1854)		female	1	-33.8652	151.21					NSW	Sydney	1907-09-05			Australia							https://doi.org/10.3897/zookeys.908.47375	ANIC
preservedSpecimen		32-111885				Amegilla	bombiformis	Amegilla bombiformis (Smith, 1854)		male	1	-33.8652	151.21					NSW	Sydney	1943-02-07		O. Dawson	Australia							https://doi.org/10.3897/zookeys.908.47375	ANIC
preservedSpecimen		32-111776				Amegilla	bombiformis	Amegilla bombiformis (Smith, 1854)		female	1	-33.8	151.3					NSW	Sydney, Manly, Kangaroo Park	1987-02-15		D.S. Horning jr.	Australia							https://doi.org/10.3897/zookeys.908.47375	ANIC
preservedSpecimen		32-111777				Amegilla	bombiformis	Amegilla bombiformis (Smith, 1854)		female	1	-33.8	151.3					NSW	Sydney, Manly, Kangaroo Park	1993-04-01		D.S. Horning jr.	Australia							https://doi.org/10.3897/zookeys.908.47375	ANIC
preservedSpecimen		32-111772				Amegilla	bombiformis	Amegilla bombiformis (Smith, 1854)		male	1	-33.8333	151.28					NSW	Sydney, South Hd, The Gap Park	1993-10-01		A. Sundholm	Australia							https://doi.org/10.3897/zookeys.908.47375	ANIC
preservedSpecimen		32-111825				Amegilla	bombiformis	Amegilla bombiformis (Smith, 1854)		female	1	-27.9667	153.2					QLD	Tamborine Mt	1960-01-17		R. Straatman	Australia							https://doi.org/10.3897/zookeys.908.47375	ANIC
preservedSpecimen		32-111826				Amegilla	bombiformis	Amegilla bombiformis (Smith, 1854)		male	1	-27.9667	153.2					QLD	Tamborine Mt	1960-01-17		R. Straatman	Australia							https://doi.org/10.3897/zookeys.908.47375	ANIC
preservedSpecimen		32-111846				Amegilla	bombiformis	Amegilla bombiformis (Smith, 1854)		female	1	-27.9667	153.2					QLD	Tamborine Mt	1916-05-18		Davidson	Australia							https://doi.org/10.3897/zookeys.908.47375	ANIC
preservedSpecimen		32-111857				Amegilla	bombiformis	Amegilla bombiformis (Smith, 1854)		female	1	-27.9667	153.2					QLD	Tamborine Mt	1960-01-17		R. Straatman	Australia							https://doi.org/10.3897/zookeys.908.47375	ANIC
preservedSpecimen		32-111858				Amegilla	bombiformis	Amegilla bombiformis (Smith, 1854)		female	1	-27.9667	153.2					QLD	Tamborine Mt	1960-01-17		R. Straatman	Australia							https://doi.org/10.3897/zookeys.908.47375	ANIC
preservedSpecimen		32-111681				Amegilla	dawsoni	Amegilla dawsoni (Rayment, 1951)		male	1								type' no other label data				Australia							https://doi.org/10.3897/zookeys.908.47375	ANIC
preservedSpecimen		32-111685				Amegilla	preissi	Amegilla preissi (Cockerell, 1910)		male	1								type' no other label data	1923-03-02			Australia							https://doi.org/10.3897/zookeys.908.47375	ANIC
preservedSpecimen		32-111714				Amegilla	preissi	Amegilla preissi (Cockerell, 1910)		male	1	-32.8462	115.924					WA	Waroona	1909-02-15		G.F. Berthoud	Australia							https://doi.org/10.3897/zookeys.908.47375	ANIC
preservedSpecimen		32-111717				Amegilla	preissi	Amegilla preissi (Cockerell, 1910)		male	1	-32.8462	115.924					WA	Waroona	1909-02-23		G.F. Berthoud	Australia							https://doi.org/10.3897/zookeys.908.47375	ANIC
preservedSpecimen		32-111828				Amegilla	rhodoscymna	Amegilla rhodoscymna (Cockerell, 1905)		male	1	-24.6728	151.962					QLD	Watalgan Ra. via Rosedale	1975-04-01		H. Frauca	Australia							https://doi.org/10.3897/zookeys.908.47375	ANIC
preservedSpecimen		32-111767				Amegilla	bombiformis	Amegilla bombiformis (Smith, 1854)		male	1							NSW	Waterfall	1964-02-01		G. William	Australia							https://doi.org/10.3897/zookeys.908.47375	ANIC
preservedSpecimen		32-111774				Amegilla	bombiformis	Amegilla bombiformis (Smith, 1854)		female	1							NSW	Wilton CSIRO Exp Farm	1982-01-12		V.J. Robinson	Australia							https://doi.org/10.3897/zookeys.908.47375	ANIC
preservedSpecimen		32-111679				Amegilla	dawsoni	Amegilla dawsoni (Rayment, 1951)		female	1	-23.1502	114.534					WA	Winning Station, NW Basin	1950-08-01		G. Thomas	Australia							https://doi.org/10.3897/zookeys.908.47375	ANIC
preservedSpecimen		32-111745				Amegilla	dawsoni	Amegilla dawsoni (Rayment, 1951)		female	1	-23.1502	114.534					WA	Winning Station, NW Basin	1950-08-01		G. Thomas	Australia							https://doi.org/10.3897/zookeys.908.47375	ANIC
preservedSpecimen		32-111746				Amegilla	dawsoni	Amegilla dawsoni (Rayment, 1951)		female	1	-23.1502	114.534					WA	Winning Station, NW Basin	1950-08-01		G. Thomas	Australia							https://doi.org/10.3897/zookeys.908.47375	ANIC
preservedSpecimen		32-111748				Amegilla	dawsoni	Amegilla dawsoni (Rayment, 1951)		female	1	-23.1502	114.534					WA	Winning Station, NW Basin	1950-08-01		G. Thomas	Australia							https://doi.org/10.3897/zookeys.908.47375	ANIC
preservedSpecimen		32-111788				Amegilla	bombiformis	Amegilla bombiformis (Smith, 1854)		female	1							NSW	Wollongong	1969-01-20		V.J. Robinson	Australia							https://doi.org/10.3897/zookeys.908.47375	ANIC
preservedSpecimen		32-111676				Amegilla	dawsoni	Amegilla dawsoni (Rayment, 1951)		female	1	-21.617	118.952					WA	Woodstock Station	1905-05-08		E.H.M. Ealy	Australia							https://doi.org/10.3897/zookeys.908.47375	ANIC
preservedSpecimen		32-111752				Amegilla	bombiformis	Amegilla bombiformis (Smith, 1854)		female	1							NSW	Woolhara	1924-01-01			Australia							https://doi.org/10.3897/zookeys.908.47375	ANIC
preservedSpecimen		32-111678				Amegilla	dawsoni	Amegilla dawsoni (Rayment, 1951)		female	1	-25.7569	114.276					WA	Wooramel River Crossing	10/8/1854			Australia							https://doi.org/10.3897/zookeys.908.47375	ANIC
preservedSpecimen		32-111711				Amegilla	calva	Amegilla calva (Rayment, 1935)		male	1	-28.5842	141.898					NSW	Yanko	8/11/1049		E.F. Riek	Australia							https://doi.org/10.3897/zookeys.908.47375	ANIC
preservedSpecimen		32-111887				Amegilla	bombiformis	Amegilla bombiformis (Smith, 1854)		female	1							NSW					Australia							https://doi.org/10.3897/zookeys.908.47375	ANIC
preservedSpecimen						Amegilla	rhodoscymna	Amegilla rhodoscymna (Cockerell, 1905)		male	1	-21.1288	149.189					QLD	Mackay	00/3/1899		Turner	Australia							https://doi.org/10.3897/zookeys.908.47375	BM		holotype rufescens (Friese)
preservedSpecimen		I-004967				Amegilla	crenata n.sp.	Amegilla crenata Leijs, 2020		male	1	-12.7167	132.9					NT	14km EbyN of Mudginberri HS	1973-06-11		T. Weir & A. Allwood	Australia							https://doi.org/10.3897/zookeys.908.47375	MAGNT
preservedSpecimen		I-004966				Amegilla	crenata n.sp.	Amegilla crenata Leijs, 2020		female	1	-12.8333	132.85					NT	16km EbyN of Mt Cahill	1972-09-16		T. Weir & A. Allwood	Australia							https://doi.org/10.3897/zookeys.908.47375	MAGNT
preservedSpecimen		I-004963				Amegilla	calva	Amegilla calva (Rayment, 1935)		female	1	-22.9694	119.769					WA	40km N of Newman, Marble Rd	1995-10-27		J. O'Grady	Australia							https://doi.org/10.3897/zookeys.908.47375	MAGNT
preservedSpecimen		I-004964				Amegilla	crenata n.sp.	Amegilla crenata Leijs, 2020		female	1	-13.4321	132.416					NT	67 mls E. Of Pine Creek, U.D.P. Falls	1971-07-08		T. Weir & A. Allwood	Australia							https://doi.org/10.3897/zookeys.908.47375	MAGNT
preservedSpecimen		I-004969				Amegilla	crenata n.sp.	Amegilla crenata Leijs, 2020		female	1	-13.4321	132.416					NT	67 mls E. Of Pine Creek, U.D.P. Falls	1971-07-08		T. Weir & A. Allwood	Australia							https://doi.org/10.3897/zookeys.908.47375	MAGNT
preservedSpecimen		I-004965				Amegilla	crenata n.sp.	Amegilla crenata Leijs, 2020		male	1	-12.5167	132.9					NT	9km EbyN of Mudginberri HS	1973-05-26		T. Weir & A. Allwood	Australia							https://doi.org/10.3897/zookeys.908.47375	MAGNT
preservedSpecimen		I-004968				Amegilla	crenata n.sp.	Amegilla crenata Leijs, 2020		male	1	-12.5167	132.9					NT	9km EbyN of Mudginberri HS	1973-06-10		T. Weir & A. Allwood	Australia							https://doi.org/10.3897/zookeys.908.47375	MAGNT
preservedSpecimen		I-004961				Amegilla	scoparia n.sp.	Amegilla scoparia Leijs, 2020		female	1	-23.6966	133.858					NT	Alice Springs	1980-08-04		G. Griffin	Australia							https://doi.org/10.3897/zookeys.908.47375	MAGNT
preservedSpecimen		I-004962				Amegilla	scoparia n.sp.	Amegilla scoparia Leijs, 2020		male	1	-24.0566	132.759					NT	Finke Gorge NP Palm Valley	1977-06-19		G. Griffin	Australia							https://doi.org/10.3897/zookeys.908.47375	MAGNT
preservedSpecimen		I-004959				Amegilla	crenata n.sp.	Amegilla crenata Leijs, 2020		female	1	-12.6713	132.842					NT	Jabiru, Jabiru Lake	1996-02-24		Brown & McAlpine	Australia							https://doi.org/10.3897/zookeys.908.47375	MAGNT
preservedSpecimen		I-004960				Amegilla	crenata n.sp.	Amegilla crenata Leijs, 2020		female	1	-12.432	132.967					NT	Kakadu NP, Bardedjilidji	1996-06-17		G. R. Brown	Australia							https://doi.org/10.3897/zookeys.908.47375	MAGNT
preservedSpecimen		I-004970				Amegilla	epaphrodita	Amegilla epaphrodita Brooks, 1988		female	1	-12.4181	132.968					NT	Kakadu NP, Ubir Rock Area	1980-03-29		M. B. Malipatil	Australia							https://doi.org/10.3897/zookeys.908.47375	MAGNT
preservedSpecimen		T238466				Amegilla	calva	Amegilla calva (Rayment, 1935)		male	1	-25.4189	142.656					QLD	"Mayfield" nr Windorah	1984-09-01		W. Smith & G. Lithgow	Australia							https://doi.org/10.3897/zookeys.908.47375	QM
preservedSpecimen		T238467				Amegilla	calva	Amegilla calva (Rayment, 1935)		female	1	-25.4189	142.656					QLD	"Mayfield" nr Windorah	1984-09-01		W. Smith & G. Lithgow	Australia							https://doi.org/10.3897/zookeys.908.47375	QM
preservedSpecimen		UQIC92277				Amegilla	scoparia n.sp.	Amegilla scoparia Leijs, 2020		female	1	-24.8667	144.767					QLD	1.5 km N Idalia Homestead Idalia Nat. Pk	1991-07-15		R. C. Willian	Australia							https://doi.org/10.3897/zookeys.908.47375	QM
preservedSpecimen		UQIC93027				Amegilla	flava	Amegilla flava (Friese, 1911)		male	1	-31.2833	119.583					WA	16 miles E of Southern Cross	1973-01-28		E.M. Exley	Australia							https://doi.org/10.3897/zookeys.908.47375	QM
preservedSpecimen		T238475				Amegilla	xylocopoides n.sp.	Amegilla xylocopoides Leijs, 2020		Male	1	-15.6705	144.588					Qld	19 km SE of Laura	2017-03-11		R. Leijs	Australia							https://doi.org/10.3897/zookeys.908.47375	QM		paratype
preservedSpecimen		T238476				Amegilla	xylocopoides n.sp.	Amegilla xylocopoides Leijs, 2020		Male	1	-15.6705	144.588					Qld	19 km SE of Laura	2017-03-11		R. Leijs	Australia							https://doi.org/10.3897/zookeys.908.47375	QM		holotype
preservedSpecimen		UQIC92912				Amegilla	calva	Amegilla calva (Rayment, 1935)		male	1	-26.6153	144.611					QLD	34.2 km E of Quilpie	1990-09-20		M.P Zalucki & G.V Maynard	Australia							https://doi.org/10.3897/zookeys.908.47375	QM
preservedSpecimen		UQIC92898				Amegilla	calva	Amegilla calva (Rayment, 1935)		female	1	-25.6667	143.2					QLD	68 km S of Windorah	1990-09-18		M.P Zalucki & G.V Maynard	Australia							https://doi.org/10.3897/zookeys.908.47375	QM
preservedSpecimen		UQIC92899				Amegilla	calva	Amegilla calva (Rayment, 1935)		female	1	-25.6667	143.2					QLD	68 km S of Windorah	1990-09-18		M.P Zalucki & G.V Maynard	Australia							https://doi.org/10.3897/zookeys.908.47375	QM
preservedSpecimen		UQIC92900				Amegilla	calva	Amegilla calva (Rayment, 1935)		male	1	-25.6667	143.2					QLD	68 km S of Windorah	1990-09-18		M.P Zalucki & G.V Maynard	Australia							https://doi.org/10.3897/zookeys.908.47375	QM
preservedSpecimen		UQIC92901				Amegilla	calva	Amegilla calva (Rayment, 1935)		male	1	-25.6667	143.2					QLD	68 km S of Windorah	1990-09-18		M.P Zalucki & G.V Maynard	Australia							https://doi.org/10.3897/zookeys.908.47375	QM
preservedSpecimen		UQIC92902				Amegilla	calva	Amegilla calva (Rayment, 1935)		male	1	-25.6667	143.2					QLD	68 km S of Windorah	1990-09-18		M.P Zalucki & G.V Maynard	Australia							https://doi.org/10.3897/zookeys.908.47375	QM
preservedSpecimen		UQIC92903				Amegilla	calva	Amegilla calva (Rayment, 1935)		male	1	-25.6667	143.2					QLD	68 km S of Windorah	1990-09-18		M.P Zalucki & G.V Maynard	Australia							https://doi.org/10.3897/zookeys.908.47375	QM
preservedSpecimen		UQIC92904				Amegilla	calva	Amegilla calva (Rayment, 1935)		male	1	-25.6667	143.2					QLD	68 km S of Windorah	1990-09-18		M.P Zalucki & G.V Maynard	Australia							https://doi.org/10.3897/zookeys.908.47375	QM
preservedSpecimen		UQIC92905				Amegilla	calva	Amegilla calva (Rayment, 1935)		female	1	-25.6667	143.2					QLD	68 km S of Windorah	1990-09-18		M.P Zalucki & G.V Maynard	Australia							https://doi.org/10.3897/zookeys.908.47375	QM
preservedSpecimen		UQIC92906				Amegilla	calva	Amegilla calva (Rayment, 1935)		female	1	-25.6667	143.2					QLD	68 km S of Windorah	1990-09-18		M.P Zalucki & G.V Maynard	Australia							https://doi.org/10.3897/zookeys.908.47375	QM
preservedSpecimen		UQIC92907				Amegilla	calva	Amegilla calva (Rayment, 1935)		male	1	-25.6667	143.2					QLD	68 km S of Windorah	1990-09-18		M.P Zalucki & G.V Maynard	Australia							https://doi.org/10.3897/zookeys.908.47375	QM
preservedSpecimen		UQIC92908				Amegilla	calva	Amegilla calva (Rayment, 1935)		female	1	-25.6667	143.2					QLD	68 km S of Windorah	1990-09-18		M.P Zalucki & G.V Maynard	Australia							https://doi.org/10.3897/zookeys.908.47375	QM
preservedSpecimen		UQIC92909				Amegilla	calva	Amegilla calva (Rayment, 1935)		male	1	-25.6667	143.2					QLD	68 km S of Windorah	1990-09-18		M.P Zalucki & G.V Maynard	Australia							https://doi.org/10.3897/zookeys.908.47375	QM
preservedSpecimen		UQIC92910				Amegilla	calva	Amegilla calva (Rayment, 1935)		female	1	-25.6667	143.2					QLD	68 km S of Windorah	1990-09-18		M.P Zalucki & G.V Maynard	Australia							https://doi.org/10.3897/zookeys.908.47375	QM
preservedSpecimen		UQIC92911				Amegilla	calva	Amegilla calva (Rayment, 1935)		male	1	-25.6667	143.2					QLD	68 km S of Windorah	1990-09-18		M.P Zalucki & G.V Maynard	Australia							https://doi.org/10.3897/zookeys.908.47375	QM
preservedSpecimen		UQIC92274				Amegilla	scoparia n.sp.	Amegilla scoparia Leijs, 2020		female	1	-25.3732	142.718					QLD	8 miles NE of Windora	1968-08-18		J.C. & T.F. Houston	Australia							https://doi.org/10.3897/zookeys.908.47375	QM
preservedSpecimen		UQIC92275				Amegilla	scoparia n.sp.	Amegilla scoparia Leijs, 2020		female	1	-25.3732	142.718					QLD	8 miles NE of Windora	1968-08-18		J.C. & T.F. Houston	Australia							https://doi.org/10.3897/zookeys.908.47375	QM
preservedSpecimen		UQIC92276				Amegilla	scoparia n.sp.	Amegilla scoparia Leijs, 2020		male	1	-25.3732	142.718					QLD	8 miles NE of Windora	1968-08-18		J.C. & T.F. Houston	Australia							https://doi.org/10.3897/zookeys.908.47375	QM
preservedSpecimen		UQIC92262				Amegilla	bombiformis	Amegilla bombiformis (Smith, 1854)		female	1	-28.5333	153.117					NSW	Barkers Vale	1985-02-22		V. Layton	Australia							https://doi.org/10.3897/zookeys.908.47375	QM
preservedSpecimen		UQIC92264				Amegilla	rhodoscymna	Amegilla rhodoscymna (Cockerell, 1905)		male	1	-26.85	152.933					QLD	Beerwah	1967-03-23		J.C. Cardale	Australia							https://doi.org/10.3897/zookeys.908.47375	QM
preservedSpecimen		UQIC92746				Amegilla	bombiformis	Amegilla bombiformis (Smith, 1854)		male	1	-27.6667	152.95					Qld	Blunder Ck, Brisbane	1979-06-19		H.E. & M.A. Evans & A. Hook	Australia							https://doi.org/10.3897/zookeys.908.47375	QM
preservedSpecimen		UQIC92747				Amegilla	bombiformis	Amegilla bombiformis (Smith, 1854)		female	1	-28.4	151.9					Qld	Braeside Range Warwick	1993-02-13		G. and A. Daniels	Australia							https://doi.org/10.3897/zookeys.908.47375	QM
preservedSpecimen		T238473				Amegilla	frogatti	Amegilla froggatti (Cockerell, 1914)		male	1	-29.9611	146.861					NSW	Brewarrina	1914-01-01		W. W. Frogatt	Australia							https://doi.org/10.3897/zookeys.908.47375	QM
preservedSpecimen		T207499				Amegilla	rhodoscymna	Amegilla rhodoscymna (Cockerell, 1905)		female	1	-27.4667	153.017					QLD	Brisbane	1912-12-05		H. Hacker	Australia							https://doi.org/10.3897/zookeys.908.47375	QM
preservedSpecimen		T238400				Amegilla	bombiformis	Amegilla bombiformis (Smith, 1854)		female	1	-27.4667	153.017					QLD	Brisbane	1914-02-10		H. Hacker	Australia							https://doi.org/10.3897/zookeys.908.47375	QM
preservedSpecimen		T238401				Amegilla	bombiformis	Amegilla bombiformis (Smith, 1854)		female	1	-27.4667	153.017					QLD	Brisbane	1914-02-11		H. Hacker	Australia							https://doi.org/10.3897/zookeys.908.47375	QM
preservedSpecimen		T238402				Amegilla	bombiformis	Amegilla bombiformis (Smith, 1854)		female	1	-27.4667	153.017					QLD	Brisbane	1914-12-22		H. Hacker	Australia							https://doi.org/10.3897/zookeys.908.47375	QM
preservedSpecimen		T238403				Amegilla	bombiformis	Amegilla bombiformis (Smith, 1854)		female	1	-27.4667	153.017					QLD	Brisbane	1915-04-07		H. Hacker	Australia							https://doi.org/10.3897/zookeys.908.47375	QM
preservedSpecimen		T238404				Amegilla	bombiformis	Amegilla bombiformis (Smith, 1854)		male	1	-27.4667	153.017					QLD	Brisbane	1912-12-10		H. Hacker	Australia							https://doi.org/10.3897/zookeys.908.47375	QM
preservedSpecimen		T238405				Amegilla	bombiformis	Amegilla bombiformis (Smith, 1854)		female	1	-27.4667	153.017					QLD	Brisbane	1913-12-02		H. Hacker	Australia							https://doi.org/10.3897/zookeys.908.47375	QM
preservedSpecimen		T238406				Amegilla	bombiformis	Amegilla bombiformis (Smith, 1854)		female	1	-27.4667	153.017					QLD	Brisbane	1913-11-09		H. Hacker	Australia							https://doi.org/10.3897/zookeys.908.47375	QM
preservedSpecimen		T238407				Amegilla	bombiformis	Amegilla bombiformis (Smith, 1854)		male	1	-27.4667	153.017					QLD	Brisbane	1912-03-18		H. Hacker	Australia							https://doi.org/10.3897/zookeys.908.47375	QM
preservedSpecimen		T238408				Amegilla	bombiformis	Amegilla bombiformis (Smith, 1854)		male	1	-27.4667	153.017					QLD	Brisbane	1912-12-22		H. Hacker	Australia							https://doi.org/10.3897/zookeys.908.47375	QM
preservedSpecimen		T238409				Amegilla	bombiformis	Amegilla bombiformis (Smith, 1854)		female	1	-27.4667	153.017					QLD	Brisbane	1912-04-07		H. Hacker	Australia							https://doi.org/10.3897/zookeys.908.47375	QM
preservedSpecimen		T238410				Amegilla	bombiformis	Amegilla bombiformis (Smith, 1854)		female	1	-27.4667	153.017					QLD	Brisbane	1916-03-08		H. Hacker	Australia							https://doi.org/10.3897/zookeys.908.47375	QM
preservedSpecimen		T238411				Amegilla	bombiformis	Amegilla bombiformis (Smith, 1854)		female	1	-27.4667	153.017					QLD	Brisbane	1934-04-08		M.Powell	Australia							https://doi.org/10.3897/zookeys.908.47375	QM
preservedSpecimen		T238412				Amegilla	bombiformis	Amegilla bombiformis (Smith, 1854)		female	1	-27.4667	153.017					QLD	Brisbane	1912-03-18		H. Hacker	Australia							https://doi.org/10.3897/zookeys.908.47375	QM
preservedSpecimen		T238413				Amegilla	bombiformis	Amegilla bombiformis (Smith, 1854)		female	1	-27.4667	153.017					QLD	Brisbane	1913-03-30		H. Hacker	Australia							https://doi.org/10.3897/zookeys.908.47375	QM
preservedSpecimen		T238414				Amegilla	bombiformis	Amegilla bombiformis (Smith, 1854)		female	1	-27.4667	153.017					QLD	Brisbane	1917-03-20		H. Hacker	Australia							https://doi.org/10.3897/zookeys.908.47375	QM
preservedSpecimen		T238415				Amegilla	bombiformis	Amegilla bombiformis (Smith, 1854)		female	1	-27.4667	153.017					QLD	Brisbane	1915-04-07		H. Hacker	Australia							https://doi.org/10.3897/zookeys.908.47375	QM
preservedSpecimen		T238416				Amegilla	bombiformis	Amegilla bombiformis (Smith, 1854)		female	1	-27.4667	153.017					QLD	Brisbane	1912-03-18		H. Hacker	Australia							https://doi.org/10.3897/zookeys.908.47375	QM
preservedSpecimen		T238417				Amegilla	bombiformis	Amegilla bombiformis (Smith, 1854)		female	1	-27.4667	153.017					QLD	Brisbane	1916-03-08		H. Hacker	Australia							https://doi.org/10.3897/zookeys.908.47375	QM
preservedSpecimen		T238418				Amegilla	bombiformis	Amegilla bombiformis (Smith, 1854)		female	1	-27.4667	153.017					QLD	Brisbane	1912-03-18		H. Hacker	Australia							https://doi.org/10.3897/zookeys.908.47375	QM
preservedSpecimen		T238419				Amegilla	bombiformis	Amegilla bombiformis (Smith, 1854)		male	1	-27.4667	153.017					QLD	Brisbane	1912-03-18		H. Hacker	Australia							https://doi.org/10.3897/zookeys.908.47375	QM
preservedSpecimen		T238421				Amegilla	bombiformis	Amegilla bombiformis (Smith, 1854)		female	1	-27.4667	153.017					QLD	Brisbane	1957-04-01		D. B. Jones	Australia							https://doi.org/10.3897/zookeys.908.47375	QM
preservedSpecimen		T238422				Amegilla	bombiformis	Amegilla bombiformis (Smith, 1854)		female	1	-27.4667	153.017					QLD	Brisbane	1969-01-07		B. H. Kay	Australia							https://doi.org/10.3897/zookeys.908.47375	QM
preservedSpecimen		T238423				Amegilla	bombiformis	Amegilla bombiformis (Smith, 1854)		female	1	-27.4667	153.017					QLD	Brisbane	1912-01-01		H. Hacker	Australia							https://doi.org/10.3897/zookeys.908.47375	QM
preservedSpecimen		T238424				Amegilla	bombiformis	Amegilla bombiformis (Smith, 1854)		female	1	-27.4667	153.017					QLD	Brisbane	1917-03-25		H. Hacker	Australia							https://doi.org/10.3897/zookeys.908.47375	QM
preservedSpecimen		T238432				Amegilla	bombiformis	Amegilla bombiformis (Smith, 1854)		female	1	-27.4667	153.017					QLD	Brisbane			T.C. Marshall	Australia							https://doi.org/10.3897/zookeys.908.47375	QM
preservedSpecimen		T238438				Amegilla	bombiformis	Amegilla bombiformis (Smith, 1854)		female	1	-27.4667	153.017					QLD	Brisbane	1923-03-01		H. Hacker	Australia							https://doi.org/10.3897/zookeys.908.47375	QM
preservedSpecimen		T238442				Amegilla	bombiformis	Amegilla bombiformis (Smith, 1854)		female	1	-27.4667	153.017					QLD	Brisbane	1916-01-28		H. Hacker	Australia							https://doi.org/10.3897/zookeys.908.47375	QM
preservedSpecimen		T238443				Amegilla	bombiformis	Amegilla bombiformis (Smith, 1854)		male	1	-27.4667	153.017					QLD	Brisbane	1912-03-18		H. Hacker	Australia							https://doi.org/10.3897/zookeys.908.47375	QM
preservedSpecimen		T238444				Amegilla	bombiformis	Amegilla bombiformis (Smith, 1854)		male	1	-27.4667	153.017					QLD	Brisbane	1917-12-10		H. Hacker	Australia							https://doi.org/10.3897/zookeys.908.47375	QM
preservedSpecimen		T238445				Amegilla	bombiformis	Amegilla bombiformis (Smith, 1854)		male	1	-27.4667	153.017					QLD	Brisbane	1912-11-12		H. Hacker	Australia							https://doi.org/10.3897/zookeys.908.47375	QM
preservedSpecimen		T238447				Amegilla	rhodoscymna	Amegilla rhodoscymna (Cockerell, 1905)		male	1	-27.4667	153.017					QLD	Brisbane	1911-12-02		H. Hacker	Australia							https://doi.org/10.3897/zookeys.908.47375	QM
preservedSpecimen		T238451				Amegilla	rhodoscymna	Amegilla rhodoscymna (Cockerell, 1905)		female	1	-27.4667	153.017					QLD	Brisbane	1914-01-20		H. Hacker	Australia							https://doi.org/10.3897/zookeys.908.47375	QM
preservedSpecimen		T238452				Amegilla	rhodoscymna	Amegilla rhodoscymna (Cockerell, 1905)		male	1	-27.4667	153.017					QLD	Brisbane	1913-02-21		H. Hacker	Australia							https://doi.org/10.3897/zookeys.908.47375	QM
preservedSpecimen		T238453				Amegilla	rhodoscymna	Amegilla rhodoscymna (Cockerell, 1905)		male	1	-27.4667	153.017					QLD	Brisbane	1914-02-10		H. Hacker	Australia							https://doi.org/10.3897/zookeys.908.47375	QM
preservedSpecimen		T238454				Amegilla	rhodoscymna	Amegilla rhodoscymna (Cockerell, 1905)		male	1	-27.4667	153.017					QLD	Brisbane	1914-02-10		H. Hacker	Australia							https://doi.org/10.3897/zookeys.908.47375	QM
preservedSpecimen		T238455				Amegilla	rhodoscymna	Amegilla rhodoscymna (Cockerell, 1905)		female	1	-27.4667	153.017					QLD	Brisbane	1914-02-10		H. Hacker	Australia							https://doi.org/10.3897/zookeys.908.47375	QM
preservedSpecimen		UQIC92250				Amegilla	bombiformis	Amegilla bombiformis (Smith, 1854)		male	1	-27.4667	153.017					Qld	Brisbane	1967-01-06		J.C. Cardale	Australia							https://doi.org/10.3897/zookeys.908.47375	QM
preservedSpecimen		UQIC92251				Amegilla	bombiformis	Amegilla bombiformis (Smith, 1854)		female	1	-27.4667	153.017					Qld	Brisbane	1967-02-02		J.C. Cardale	Australia							https://doi.org/10.3897/zookeys.908.47375	QM
preservedSpecimen		UQIC92252				Amegilla	bombiformis	Amegilla bombiformis (Smith, 1854)		female	1	-27.4667	153.017					Qld	Brisbane	1967-01-16		J.C. Cardale	Australia							https://doi.org/10.3897/zookeys.908.47375	QM
preservedSpecimen		UQIC92253				Amegilla	bombiformis	Amegilla bombiformis (Smith, 1854)		female	1	-27.4667	153.017					Qld	Brisbane	1967-01-10		J.C. Cardale	Australia							https://doi.org/10.3897/zookeys.908.47375	QM
preservedSpecimen		UQIC92254				Amegilla	bombiformis	Amegilla bombiformis (Smith, 1854)		female	1	-27.4667	153.017					Qld	Brisbane	1967-02-14		J.C. Cardale	Australia							https://doi.org/10.3897/zookeys.908.47375	QM
preservedSpecimen		UQIC92255				Amegilla	bombiformis	Amegilla bombiformis (Smith, 1854)		female	1	-27.4667	153.017					Qld	Brisbane	1967-02-10		J.C. Cardale	Australia							https://doi.org/10.3897/zookeys.908.47375	QM
preservedSpecimen		UQIC92256				Amegilla	bombiformis	Amegilla bombiformis (Smith, 1854)		female	1	-27.4667	153.017					Qld	Brisbane	1962-10-19		R. J. Elder	Australia							https://doi.org/10.3897/zookeys.908.47375	QM
preservedSpecimen		UQIC92257				Amegilla	bombiformis	Amegilla bombiformis (Smith, 1854)		female	1	-27.4667	153.017					Qld	Brisbane	1975-04-29		T. McRae	Australia							https://doi.org/10.3897/zookeys.908.47375	QM
preservedSpecimen		UQIC92258				Amegilla	bombiformis	Amegilla bombiformis (Smith, 1854)		female	1	-27.4667	153.017					Qld	Brisbane	1962-03-10		J. Barnes	Australia							https://doi.org/10.3897/zookeys.908.47375	QM
preservedSpecimen		UQIC92259				Amegilla	bombiformis	Amegilla bombiformis (Smith, 1854)		female	1	-27.4667	153.017					Qld	Brisbane	1937-05-08		P. W. Grogan	Australia							https://doi.org/10.3897/zookeys.908.47375	QM
preservedSpecimen		UQIC92265				Amegilla	rhodoscymna	Amegilla rhodoscymna (Cockerell, 1905)		female	1	-27.4667	153.017					QLD	Brisbane	1959-12-07		Haseler	Australia							https://doi.org/10.3897/zookeys.908.47375	QM
preservedSpecimen		UQIC92271				Amegilla	bombiformis	Amegilla bombiformis (Smith, 1854)		male	1	-27.4667	153.017					Qld	Brisbane	1946-04-07		Daenham	Australia							https://doi.org/10.3897/zookeys.908.47375	QM
preservedSpecimen		T238426				Amegilla	bombiformis	Amegilla bombiformis (Smith, 1854)		female	1	-27.4667	153.017					QLD	Brisbane-Gordon Park	29/4//1953		E. Duffy	Australia							https://doi.org/10.3897/zookeys.908.47375	QM
preservedSpecimen		T238429				Amegilla	bombiformis	Amegilla bombiformis (Smith, 1854)		female	1	-27.4667	153.017					QLD	Brisbane-Gordon Park	29/4//1953		E. Duffy	Australia							https://doi.org/10.3897/zookeys.908.47375	QM
preservedSpecimen		T238425				Amegilla	bombiformis	Amegilla bombiformis (Smith, 1854)		female	1	-27.4667	153.017					QLD	Brisbane-Museum Building	1958-04-29		S. Deller	Australia							https://doi.org/10.3897/zookeys.908.47375	QM
preservedSpecimen		T238434				Amegilla	bombiformis	Amegilla bombiformis (Smith, 1854)		male	1	-27.4333	153.017					QLD	Brisbane-Windsor	1997-03-08		C. J. Burwell & S. Evans	Australia							https://doi.org/10.3897/zookeys.908.47375	QM
preservedSpecimen		T238436				Amegilla	bombiformis	Amegilla bombiformis (Smith, 1854)		female	1	-27.4333	153.017					QLD	Brisbane-Windsor	1939-01-25		R. A. Dow	Australia							https://doi.org/10.3897/zookeys.908.47375	QM
preservedSpecimen		T238430				Amegilla	bombiformis	Amegilla bombiformis (Smith, 1854)		male	1	-26.6833	153.05					QLD	Buderim Mt	7/4//1912		H. Hacker	Australia							https://doi.org/10.3897/zookeys.908.47375	QM
preservedSpecimen		UQIC92261				Amegilla	bombiformis	Amegilla bombiformis (Smith, 1854)		female	1	-26.8333	151.55					Qld	Bunya Mtns	1969-01-31		T.F. Houston	Australia							https://doi.org/10.3897/zookeys.908.47375	QM
preservedSpecimen		T238474				Amegilla	A. (Zonamegilla) pulchra	Amegilla pulchra (Smith, 1854)		female	1	-16.7669	145.676					QLD	Cairns-Clifton Beach	1986-12-12		J. Gallon	Australia							https://doi.org/10.3897/zookeys.908.47375	QM
preservedSpecimen		T238435				Amegilla	albiceps	Amegilla albiceps (Rayment, 1951)		male	1	-26.7493	150.633					QLD	Chinchilla-"Allinga'	1985-03-15			Australia							https://doi.org/10.3897/zookeys.908.47375	QM
preservedSpecimen		UQIC92745				Amegilla	rhodoscymna	Amegilla rhodoscymna (Cockerell, 1905)		female	1	-15.4667	145.25					QLD	Cooktown	1978-11-13		E. M. Exley and K. Walker	Australia							https://doi.org/10.3897/zookeys.908.47375	QM
preservedSpecimen		T238457				Amegilla	calva	Amegilla calva (Rayment, 1935)		male	1	-23.5067	144.706					QLD	Dartmouth	1955-10-01		M. E. McAnna	Australia							https://doi.org/10.3897/zookeys.908.47375	QM
preservedSpecimen		T238458				Amegilla	calva	Amegilla calva (Rayment, 1935)		male	1	-23.5067	144.706					QLD	Dartmouth	1955-10-01		M. E. McAnna	Australia							https://doi.org/10.3897/zookeys.908.47375	QM
preservedSpecimen		T238459				Amegilla	calva	Amegilla calva (Rayment, 1935)		male	1	-23.5067	144.706					QLD	Dartmouth	1955-10-01		M. E. McAnna	Australia							https://doi.org/10.3897/zookeys.908.47375	QM
preservedSpecimen		T238460				Amegilla	calva	Amegilla calva (Rayment, 1935)		female	1	-23.5067	144.706					QLD	Dartmouth	1955-10-01		M. E. McAnna	Australia							https://doi.org/10.3897/zookeys.908.47375	QM
preservedSpecimen		T238461				Amegilla	calva	Amegilla calva (Rayment, 1935)		male	1	-23.5067	144.706					QLD	Dartmouth	1955-10-01		M. E. McAnna	Australia							https://doi.org/10.3897/zookeys.908.47375	QM
preservedSpecimen		T238462				Amegilla	calva	Amegilla calva (Rayment, 1935)		female	1	-23.5067	144.706					QLD	Dartmouth	1955-10-01		M. E. McAnna	Australia							https://doi.org/10.3897/zookeys.908.47375	QM
preservedSpecimen		T238463				Amegilla	calva	Amegilla calva (Rayment, 1935)		male	1	-23.5067	144.706					QLD	Dartmouth	1955-10-01		M. E. McAnna	Australia							https://doi.org/10.3897/zookeys.908.47375	QM
preservedSpecimen		T238464				Amegilla	calva	Amegilla calva (Rayment, 1935)		male	1	-23.5067	144.706					QLD	Dartmouth	1955-10-01		M. E. McAnna	Australia							https://doi.org/10.3897/zookeys.908.47375	QM
preservedSpecimen		T238465				Amegilla	calva	Amegilla calva (Rayment, 1935)		female	1	-23.5067	144.706					QLD	Dartmouth	1955-10-01		M. E. McAnna	Australia							https://doi.org/10.3897/zookeys.908.47375	QM
preservedSpecimen		UQIC92266				Amegilla	rhodoscymna	Amegilla rhodoscymna (Cockerell, 1905)		female	1	-25.6167	151.617					QLD	Gayndah	1959-02-10		H. A. Rose	Australia							https://doi.org/10.3897/zookeys.908.47375	QM
preservedSpecimen		T238456				Amegilla	crenata n.sp.	Amegilla crenata Leijs, 2020		female	1	-13.0833	133.083					NT	Gorge NE of Mt Gilruth	1979-07-13		G. Monteith & D. Cook	Australia							https://doi.org/10.3897/zookeys.908.47375	QM
preservedSpecimen		T238420				Amegilla	bombiformis	Amegilla bombiformis (Smith, 1854)		female	1							QLD	Highvale	1962-04-14		B. Bateman	Australia							https://doi.org/10.3897/zookeys.908.47375	QM
preservedSpecimen		T238441				Amegilla	A. (Notomegilla) aeruginosa	Amegilla aeruginosa (Smith, 1854)		female	1	-15.7306	136.812					NT	Horn Islet-Sir Edward Pellew group	1968-01-31		B. Cantrell	Australia							https://doi.org/10.3897/zookeys.908.47375	QM
preservedSpecimen		UQIC92516				Amegilla	bombiformis	Amegilla bombiformis (Smith, 1854)		female	1	-27.5	152.967					Qld	Indooroopilly Brisbane	1981-03-17		S.W. De Beer	Australia							https://doi.org/10.3897/zookeys.908.47375	QM
preservedSpecimen		UQIC92260				Amegilla	bombiformis	Amegilla bombiformis (Smith, 1854)		female	1	-27.6167	152.783					Qld	Ipswich	1975-03-18		C. Wild	Australia							https://doi.org/10.3897/zookeys.908.47375	QM
preservedSpecimen		UQIC92734				Amegilla	crenata n.sp.	Amegilla crenata Leijs, 2020		male	1	-14.3167	132.467					NT	Katherine Gorge Nat. Pk	1992-12-30		G. & A. Daniels	Australia							https://doi.org/10.3897/zookeys.908.47375	QM
preservedSpecimen											1												Australia							https://doi.org/10.3897/zookeys.908.47375
preservedSpecimen		T238468					nitidiventris n.sp.	Amegilla nitidiventris Leijs, 2020		m	1	-15.5583	144.446					Qld	Laura General Store	2017-03-11		R. Leijs	Australia							https://doi.org/10.3897/zookeys.908.47375	QM		paratype
preservedSpecimen		T238477					nitidiventris n.sp.	Amegilla nitidiventris Leijs, 2020		m	1	-15.5657	144.449					Qld	Laura Roadhouse	2017-03-10		R. Leijs	Australia							https://doi.org/10.3897/zookeys.908.47375	QM		holotype
preservedSpecimen		T238478					nitidiventris n.sp.	Amegilla nitidiventris Leijs, 2020		f	1	-15.5657	144.449					Qld	Laura Roadhouse	2017-03-10		R. Leijs	Australia							https://doi.org/10.3897/zookeys.908.47375	QM		Allotype
preservedSpecimen		UQIC92272					bombiformis	Amegilla bombiformis (Smith, 1854)		male	1	-27.5667	152.333					Qld	Lawes	1948-12-05		Milford	Australia							https://doi.org/10.3897/zookeys.908.47375	QM
preservedSpecimen		UQIC92268					dawsoni	Amegilla dawsoni (Rayment, 1951)		female	1	-22.241	114.081					WA	Learmonth	1973-08-26			Australia							https://doi.org/10.3897/zookeys.908.47375	QM
preservedSpecimen		UQIC92269					dawsoni	Amegilla dawsoni (Rayment, 1951)		male	1	-22.241	114.081					WA	Learmonth	1973-07-15			Australia							https://doi.org/10.3897/zookeys.908.47375	QM
preservedSpecimen		UQIC92270					dawsoni	Amegilla dawsoni (Rayment, 1951)		male	1	-22.241	114.081					WA	Learmonth	1973-07-15			Australia							https://doi.org/10.3897/zookeys.908.47375	QM
preservedSpecimen		UQIC92267					rhodoscymna	Amegilla rhodoscymna (Cockerell, 1905)		male	1	-15.1833	145.017					QLD	Miller's Crossing, 30 miles N of Cooktown	1965-11-25		G. Monteith	Australia							https://doi.org/10.3897/zookeys.908.47375	QM
preservedSpecimen		T238433					bombiformis	Amegilla bombiformis (Smith, 1854)		male	1	-24.9333	148.067					QLD	Mt Moffad NP-Peawaddy Gorge	1996-02-25		C. J. Burwell	Australia							https://doi.org/10.3897/zookeys.908.47375	QM
preservedSpecimen		UQIC92739					rhodoscymna	Amegilla rhodoscymna (Cockerell, 1905)		male	1	-13.9667	143.183					QLD	Mt White Coen	1982-06-11		D. Sands	Australia							https://doi.org/10.3897/zookeys.908.47375	QM
preservedSpecimen		T238439					bombiformis	Amegilla bombiformis (Smith, 1854)		male	1							QLD	National Pk	1923-12-01		H. Hacker	Australia							https://doi.org/10.3897/zookeys.908.47375	QM
preservedSpecimen		T238449					rhodoscymna	Amegilla rhodoscymna (Cockerell, 1905)		male	1							QLD	no locality data			H. Hacker	Australia							https://doi.org/10.3897/zookeys.908.47375	QM
preservedSpecimen		T238450					rhodoscymna	Amegilla rhodoscymna (Cockerell, 1905)		male	1							QLD	no locality data			H. Hacker	Australia							https://doi.org/10.3897/zookeys.908.47375	QM
preservedSpecimen		T238440					preissi	Amegilla preissi (Cockerell, 1910)		male	1	-31.9555	115.839					WA	Perth			G.H. Hardy	Australia							https://doi.org/10.3897/zookeys.908.47375	QM
preservedSpecimen		T238448					rhodoscymna	Amegilla rhodoscymna (Cockerell, 1905)		female	1	-25.3013	152.834					QLD	Pialba	1909-01-01		H. Harris	Australia							https://doi.org/10.3897/zookeys.908.47375	QM
preservedSpecimen		UQIC92742					bombiformis	Amegilla bombiformis (Smith, 1854)		male	1	-31.45	152.917					NSW	Port Macquarie	1985-03-08		R. Eastwood	Australia							https://doi.org/10.3897/zookeys.908.47375	QM
preservedSpecimen		UQIC92743					bombiformis	Amegilla bombiformis (Smith, 1854)		male	1	-31.45	152.917					NSW	Port Macquarie	1985-03-08		R. Eastwood	Australia							https://doi.org/10.3897/zookeys.908.47375	QM
preservedSpecimen		T238470					frogatti	Amegilla froggatti (Cockerell, 1914)		female	1	-27.8367	-150.112					QLD	Southwood NP - 12464	2005-12-09		S. Wright	Australia							https://doi.org/10.3897/zookeys.908.47375	QM
preservedSpecimen		T238471					frogatti	Amegilla froggatti (Cockerell, 1914)		male	1	-27.8367	150.112					QLD	Southwood NP - 12464	2005-12-10		S. Wright	Australia							https://doi.org/10.3897/zookeys.908.47375	QM
preservedSpecimen		T238472					frogatti	Amegilla froggatti (Cockerell, 1914)		male	1	-27.8367	150.112					QLD	Southwood NP - 12464	2005-12-11		S. Wright	Australia							https://doi.org/10.3897/zookeys.908.47375	QM
preservedSpecimen		T238431					bombiformis	Amegilla bombiformis (Smith, 1854)		female	1	-27.9667	153.2					QLD	Tamborine Mt			W. H. Davidson	Australia							https://doi.org/10.3897/zookeys.908.47375	QM
preservedSpecimen		T238446					bombiformis	Amegilla bombiformis (Smith, 1854)		male	1							NSW	Tooloom	1926-01-01		H. Hacker	Australia							https://doi.org/10.3897/zookeys.908.47375	QM
preservedSpecimen		T238427					bombiformis	Amegilla bombiformis (Smith, 1854)		male	1	-27.5833	151.617					QLD	Toowoomba	1907-12-09		H. Harris	Australia							https://doi.org/10.3897/zookeys.908.47375	QM
preservedSpecimen		T238428					bombiformis	Amegilla bombiformis (Smith, 1854)		male	1	-27.5833	151.617					QLD	Toowoomba	1907-12-10		H. Harris	Australia							https://doi.org/10.3897/zookeys.908.47375	QM
preservedSpecimen		UQIC92263					bombiformis	Amegilla bombiformis (Smith, 1854)		female	1	-27.5833	151.617					Qld	Toowoomba	1916-02-06		J.A. Beck	Australia							https://doi.org/10.3897/zookeys.908.47375	QM
preservedSpecimen		T238437					bombiformis	Amegilla bombiformis (Smith, 1854)		female	1	-27.3835	153.066					QLD	Virginia	1955-01-22		R. Woodcroft	Australia							https://doi.org/10.3897/zookeys.908.47375	QM
preservedSpecimen		UQIC92744					bombiformis	Amegilla bombiformis (Smith, 1854)		female	1	-26.5333	153.083					Qld	W of Coolum	1986-03-08		R. Eastwood	Australia							https://doi.org/10.3897/zookeys.908.47375	QM
preservedSpecimen		UQIC92273					bombiformis	Amegilla bombiformis (Smith, 1854)		male	1	-28.2167	152.033					Qld	Warwick	1961-01-04		J.B. Ritsch	Australia							https://doi.org/10.3897/zookeys.908.47375	QM
preservedSpecimen		T238468									1												Australia							https://doi.org/10.3897/zookeys.908.47375	QM
preservedSpecimen		T238469									1												Australia							https://doi.org/10.3897/zookeys.908.47375	QM
preservedSpecimen		32-033500					calva	Amegilla calva (Rayment, 1935)		male	1	-23.2339	119.904					WA	14 mls NE of Newman	1971-08-28		T.F. Houston	Australia							https://doi.org/10.3897/zookeys.908.47375	SAMA
preservedSpecimen		32-033501					calva	Amegilla calva (Rayment, 1935)		male	1	-23.2339	119.904					WA	14 mls NE of Newman	1971-08-28		T.F. Houston	Australia							https://doi.org/10.3897/zookeys.908.47375	SAMA
preservedSpecimen		32-033502					calva	Amegilla calva (Rayment, 1935)		male	1	-23.2339	119.904					WA	14 mls NE of Newman	1971-08-28		T.F. Houston	Australia							https://doi.org/10.3897/zookeys.908.47375	SAMA
preservedSpecimen		32-033503					calva	Amegilla calva (Rayment, 1935)		male	1	-23.2339	119.904					WA	14 mls NE of Newman	1971-08-28		T.F. Houston	Australia							https://doi.org/10.3897/zookeys.908.47375	SAMA
preservedSpecimen		32-033504					calva	Amegilla calva (Rayment, 1935)		male	1	-23.2339	119.904					WA	14 mls NE of Newman	1971-08-28		T.F. Houston	Australia							https://doi.org/10.3897/zookeys.908.47375	SAMA
preservedSpecimen		32-033505					calva	Amegilla calva (Rayment, 1935)		female	1	-23.2339	119.904					WA	14 mls NE of Newman	1971-08-28		T.F. Houston	Australia							https://doi.org/10.3897/zookeys.908.47375	SAMA
preservedSpecimen		32-033506					calva	Amegilla calva (Rayment, 1935)		female	1	-23.2339	119.904					WA	14 mls NE of Newman	1971-08-28		T.F. Houston	Australia							https://doi.org/10.3897/zookeys.908.47375	SAMA
preservedSpecimen		32-033507					calva	Amegilla calva (Rayment, 1935)		female	1	-23.2339	119.904					WA	14 mls NE of Newman	1971-08-28		T.F. Houston	Australia							https://doi.org/10.3897/zookeys.908.47375	SAMA
preservedSpecimen		32-033508					calva	Amegilla calva (Rayment, 1935)		female	1	-23.2339	119.904					WA	14 mls NE of Newman	1971-08-28		T.F. Houston	Australia							https://doi.org/10.3897/zookeys.908.47375	SAMA
preservedSpecimen		32-033509					calva	Amegilla calva (Rayment, 1935)		female	1	-23.2339	119.904					WA	14 mls NE of Newman	1971-08-28		T.F. Houston	Australia							https://doi.org/10.3897/zookeys.908.47375	SAMA
preservedSpecimen		32-033510					calva	Amegilla calva (Rayment, 1935)		female	1	-23.2339	119.904					WA	14 mls NE of Newman	1971-08-29		T.F. Houston	Australia							https://doi.org/10.3897/zookeys.908.47375	SAMA
preservedSpecimen		32-033511					calva	Amegilla calva (Rayment, 1935)		female	1	-23.2339	119.904					WA	14 mls NE of Newman	1971-08-29		T.F. Houston	Australia							https://doi.org/10.3897/zookeys.908.47375	SAMA
preservedSpecimen		32-033512					calva	Amegilla calva (Rayment, 1935)		female	1	-23.2339	119.904					WA	14 mls NE of Newman	1971-08-28		T.F. Houston	Australia							https://doi.org/10.3897/zookeys.908.47375	SAMA
preservedSpecimen		32-033570					dawsoni	Amegilla dawsoni (Rayment, 1951)		female	1	-23.2339	119.904					WA	14 mls NE of Newman	1971-08-28		T.F. Houston	Australia							https://doi.org/10.3897/zookeys.908.47375	SAMA
preservedSpecimen		32-033577					dawsoni	Amegilla dawsoni (Rayment, 1951)		female	1	-23.2339	119.904					WA	14 mls NE of Newman	1971-08-28		T.F. Houston	Australia							https://doi.org/10.3897/zookeys.908.47375	SAMA
preservedSpecimen		32-033562					dawsoni	Amegilla dawsoni (Rayment, 1951)		male	1	-23.8835	114.714					WA	160 mls NE Carnarvon, Manilya River	1960-08-01		H.E. Owen-Smyth	Australia							https://doi.org/10.3897/zookeys.908.47375	SAMA
preservedSpecimen		32-033563					dawsoni	Amegilla dawsoni (Rayment, 1951)		male	1	-23.8835	114.714					WA	160 mls NE Carnarvon, Manilya River	1960-08-01		H.E. Owen-Smyth	Australia							https://doi.org/10.3897/zookeys.908.47375	SAMA
preservedSpecimen		32-033564					dawsoni	Amegilla dawsoni (Rayment, 1951)		female	1	-23.8835	114.714					WA	160 mls NE Carnarvon, Manilya River	1960-08-01		H.E. Owen-Smyth	Australia							https://doi.org/10.3897/zookeys.908.47375	SAMA
preservedSpecimen		32-033540					scoparia n.sp.	Amegilla scoparia Leijs, 2020		female	1	-29.0741	130.28					SA	170 km N of Cook	1980-08-21		M. Barrett	Australia							https://doi.org/10.3897/zookeys.908.47375	SAMA
preservedSpecimen		32-033603					xylocopoides n.sp.	Amegilla xylocopoides Leijs, 2020		Male	1	-15.6609	144.575					Qld	18 km SE of Laura	2017-03-15		R. Leijs	Australia							https://doi.org/10.3897/zookeys.908.47375	SAMA		paratype
preservedSpecimen		32-033604					xylocopoides n.sp.	Amegilla xylocopoides Leijs, 2020		Male	1	-15.6609	144.575					Qld	18 km SE of Laura	2017-03-15		R. Leijs	Australia							https://doi.org/10.3897/zookeys.908.47375	SAMA		paratype
preservedSpecimen		32-033525					flava	Amegilla flava (Friese, 1911)		female	1	-35.437	141.197					VIC	19 km S of Murrayville	1977-03-02		C. & T. Houston	Australia							https://doi.org/10.3897/zookeys.908.47375	SAMA
preservedSpecimen		32-033605					xylocopoides n.sp.	Amegilla xylocopoides Leijs, 2020		Male	1	-15.6705	144.588					Qld	19 km SE of Laura	2017-03-11		R. Leijs	Australia							https://doi.org/10.3897/zookeys.908.47375	SAMA		paratype
preservedSpecimen		32-033606					xylocopoides n.sp.	Amegilla xylocopoides Leijs, 2020		Male	1	-15.6705	144.588					Qld	19 km SE of Laura	2017-03-11		R. Leijs	Australia							https://doi.org/10.3897/zookeys.908.47375	SAMA		paratype
preservedSpecimen		32-033521					albiceps	Amegilla albiceps (Rayment, 1951)		male	1	-32.9557	139.147					SA	19 mls NE of Terowie	1971-02-01		T.F. Houston	Australia							https://doi.org/10.3897/zookeys.908.47375	SAMA
preservedSpecimen		32-033522					albiceps	Amegilla albiceps (Rayment, 1951)		male	1	-32.9557	139.147					SA	19 mls NE of Terowie	1971-02-01		T.F. Houston	Australia							https://doi.org/10.3897/zookeys.908.47375	SAMA
preservedSpecimen		32-033523					albiceps	Amegilla albiceps (Rayment, 1951)		male	1	-32.9557	139.147					SA	19 mls NE of Terowie	1971-02-01		T.F. Houston	Australia							https://doi.org/10.3897/zookeys.908.47375	SAMA
preservedSpecimen		32-033568					dawsoni	Amegilla dawsoni (Rayment, 1951)		male	1	-24.6079	113.887					WA	24 mls NE Carnarvon	1971-08-21		T.F.Houston	Australia							https://doi.org/10.3897/zookeys.908.47375	SAMA
preservedSpecimen		32-033573					dawsoni	Amegilla dawsoni (Rayment, 1951)		male	1	-24.6079	113.887					WA	24 mls NE Carnarvon	1971-08-21		T.F.Houston	Australia							https://doi.org/10.3897/zookeys.908.47375	SAMA
preservedSpecimen		32-033584					dawsoni	Amegilla dawsoni (Rayment, 1951)		male	1	-24.6079	113.887					WA	24 mls NE Carnarvon	1971-08-21		T.F.Houston	Australia							https://doi.org/10.3897/zookeys.908.47375	SAMA
preservedSpecimen		32-033585					dawsoni	Amegilla dawsoni (Rayment, 1951)		male	1	-24.6079	113.887					WA	24 mls NE Carnarvon	1971-08-21		T.F.Houston	Australia							https://doi.org/10.3897/zookeys.908.47375	SAMA
preservedSpecimen		32-033586					dawsoni	Amegilla dawsoni (Rayment, 1951)		male	1	-24.6079	113.887					WA	24 mls NE Carnarvon	1971-08-21		T.F.Houston	Australia							https://doi.org/10.3897/zookeys.908.47375	SAMA
preservedSpecimen		32-036287					calva	Amegilla calva (Rayment, 1935)		female	1	-26.2081	117.841					WA	25 km NW Belele	2005-10-20		R.Leijs	Australia							https://doi.org/10.3897/zookeys.908.47375	SAMA
preservedSpecimen		32-033513					batleyi n.sp.	Amegilla batleyi Leijs, 2020		female	1	-20.0681	134.208					NT	29 km S of Tennant Creek	1973-05-20		T.F. Houston	Australia							https://doi.org/10.3897/zookeys.908.47375	SAMA
preservedSpecimen		32-033514					batleyi n.sp.	Amegilla batleyi Leijs, 2020		female	1	-20.0681	134.208					NT	29 km S of Tennant Creek	1973-05-20		T.F. Houston	Australia							https://doi.org/10.3897/zookeys.908.47375	SAMA
preservedSpecimen		32-033515					batleyi n.sp.	Amegilla batleyi Leijs, 2020		female	1	-20.0681	134.208					NT	29 km S of Tennant Creek	1973-05-20		T.F. Houston	Australia							https://doi.org/10.3897/zookeys.908.47375	SAMA
preservedSpecimen		32-033516					batleyi n.sp.	Amegilla batleyi Leijs, 2020		female	1	-20.0681	134.208					NT	29 km S of Tennant Creek	1973-05-20		T.F. Houston	Australia							https://doi.org/10.3897/zookeys.908.47375	SAMA
preservedSpecimen		32-033565					dawsoni	Amegilla dawsoni (Rayment, 1951)		female	1	-24.3937	114.01					WA	40 mls NE Carnarvon	1971-08-22		T.F.Houston	Australia							https://doi.org/10.3897/zookeys.908.47375	SAMA
preservedSpecimen		32-033566					dawsoni	Amegilla dawsoni (Rayment, 1951)		female	1	-24.3937	114.01					WA	40 mls NE Carnarvon	1971-08-22		T.F.Houston	Australia							https://doi.org/10.3897/zookeys.908.47375	SAMA
preservedSpecimen		32-033567					dawsoni	Amegilla dawsoni (Rayment, 1951)		female	1	-24.3937	114.01					WA	40 mls NE Carnarvon	1971-08-22		T.F.Houston	Australia							https://doi.org/10.3897/zookeys.908.47375	SAMA
preservedSpecimen		32-033569					dawsoni	Amegilla dawsoni (Rayment, 1951)		female	1	-24.3937	114.01					WA	40 mls NE Carnarvon	1971-08-22		T.F.Houston	Australia							https://doi.org/10.3897/zookeys.908.47375	SAMA
preservedSpecimen		32-033572					dawsoni	Amegilla dawsoni (Rayment, 1951)		female	1	-24.3937	114.01					WA	40 mls NE Carnarvon	1971-08-22		T.F.Houston	Australia							https://doi.org/10.3897/zookeys.908.47375	SAMA
preservedSpecimen		32-033574					dawsoni	Amegilla dawsoni (Rayment, 1951)		female	1	-24.3937	114.01					WA	40 mls NE Carnarvon	1971-08-22		T.F.Houston	Australia							https://doi.org/10.3897/zookeys.908.47375	SAMA
preservedSpecimen		32-033575					dawsoni	Amegilla dawsoni (Rayment, 1951)		female	1	-24.3937	114.01					WA	40 mls NE Carnarvon	1971-08-22		T.F.Houston	Australia							https://doi.org/10.3897/zookeys.908.47375	SAMA
preservedSpecimen		32-033578					dawsoni	Amegilla dawsoni (Rayment, 1951)		female	1	-24.3937	114.01					WA	40 mls NE Carnarvon	1971-08-22		T.F.Houston	Australia							https://doi.org/10.3897/zookeys.908.47375	SAMA
preservedSpecimen		32-033579					dawsoni	Amegilla dawsoni (Rayment, 1951)		male	1	-24.3937	114.01					WA	40 mls NE Carnarvon	1971-08-22		T.F.Houston	Australia							https://doi.org/10.3897/zookeys.908.47375	SAMA
preservedSpecimen		32-033580					dawsoni	Amegilla dawsoni (Rayment, 1951)		female	1	-24.3937	114.01					WA	40 mls NE Carnarvon	1971-08-22		T.F.Houston	Australia							https://doi.org/10.3897/zookeys.908.47375	SAMA
preservedSpecimen		32-033581					dawsoni	Amegilla dawsoni (Rayment, 1951)		female	1	-24.3937	114.01					WA	40 mls NE Carnarvon	1971-08-22		T.F.Houston	Australia							https://doi.org/10.3897/zookeys.908.47375	SAMA
preservedSpecimen		32-033582					dawsoni	Amegilla dawsoni (Rayment, 1951)		male	1	-24.3937	114.01					WA	40 mls NE Carnarvon	1971-08-22		T.F.Houston	Australia							https://doi.org/10.3897/zookeys.908.47375	SAMA
preservedSpecimen		32-033583					dawsoni	Amegilla dawsoni (Rayment, 1951)		male	1	-24.3937	114.01					WA	40 mls NE Carnarvon	1971-08-22		T.F.Houston	Australia							https://doi.org/10.3897/zookeys.908.47375	SAMA
preservedSpecimen		32-002678					nitidiventris n.sp.	Amegilla nitidiventris Leijs, 2020		m	1	-15.5011	144.484					Qld	6.7 km NE of Laura	2017-03-07		R. Leijs	Australia							https://doi.org/10.3897/zookeys.908.47375	SAMA		paratype
preservedSpecimen		32-033602					xylocopoides n.sp.	Amegilla xylocopoides Leijs, 2020		Male	1	-15.5011	144.484					Qld	6.7 km NE of Laura	2017-03-15		R. Leijs	Australia							https://doi.org/10.3897/zookeys.908.47375	SAMA		paratype
preservedSpecimen		32-033589					scoparia n.sp.	Amegilla scoparia Leijs, 2020		female	1	-26.0808	118.692					WA	60 km N of Meekatharra	2002-06-12		R. Leijs	Australia							https://doi.org/10.3897/zookeys.908.47375	SAMA
preservedSpecimen		32-033590					scoparia n.sp.	Amegilla scoparia Leijs, 2020		female	1	-26.0808	118.692					WA	60 km N of Meekatharra	2002-06-12		R. Leijs	Australia							https://doi.org/10.3897/zookeys.908.47375	SAMA
preservedSpecimen		32-033571					dawsoni	Amegilla dawsoni (Rayment, 1951)		female	1	-24.1092	119.707					WA	83 mls S of Newman	1971-08-28		T.F. Houston	Australia							https://doi.org/10.3897/zookeys.908.47375	SAMA
preservedSpecimen		32-033576					dawsoni	Amegilla dawsoni (Rayment, 1951)		male	1	-24.1092	119.707					WA	83 mls S of Newman	1971-08-28		T.F. Houston	Australia							https://doi.org/10.3897/zookeys.908.47375	SAMA
preservedSpecimen		32-033614					scoparia n.sp.	Amegilla scoparia Leijs, 2020		female	1	-30.7263	137.201					SA	Andamooka HS	2016-08-29		R. Leijs	Australia							https://doi.org/10.3897/zookeys.908.47375	SAMA		Allotype
preservedSpecimen		32-036280					scoparia n.sp.	Amegilla scoparia Leijs, 2020		male	1	-30.7263	137.201					SA	Andamooka HS	2016-08-29		R. Leijs	Australia							https://doi.org/10.3897/zookeys.908.47375	SAMA		paratype
preservedSpecimen		32-036281					scoparia n.sp.	Amegilla scoparia Leijs, 2020		female	1	-30.7263	137.201					SA	Andamooka HS	2016-08-29		R. Leijs	Australia							https://doi.org/10.3897/zookeys.908.47375	SAMA		paratype
preservedSpecimen		32-036282					scoparia n.sp.	Amegilla scoparia Leijs, 2020		female	1	-30.7263	137.201					SA	Andamooka HS	2016-08-29		R. Leijs	Australia							https://doi.org/10.3897/zookeys.908.47375	SAMA		paratype
preservedSpecimen		32-036283					scoparia n.sp.	Amegilla scoparia Leijs, 2020		male	1	-30.7263	137.201					SA	Andamooka HS	2016-08-29		R. Leijs	Australia							https://doi.org/10.3897/zookeys.908.47375	SAMA		paratype
preservedSpecimen		32-033613					scoparia n.sp.	Amegilla scoparia Leijs, 2020		1m	1	-30.6179	139.321					SA	Beltana Stn	2009-06-15		R. & P. Leijs	Australia							https://doi.org/10.3897/zookeys.908.47375	SAMA		holotype
preservedSpecimen		32-033552					calva	Amegilla calva (Rayment, 1935)		male	1	-27.0167	129.867					SA	between Makiri Bore and Freegon	1996-10-26		Pitlands survey	Australia							https://doi.org/10.3897/zookeys.908.47375	SAMA
preservedSpecimen		32-033599					albigenella	Amegilla albigenella Michener, 1965		male	1	-30.2934	135.418					SA	Bon Bon Stn	2010-10-26		R.Leijs	Australia							https://doi.org/10.3897/zookeys.908.47375	SAMA
preservedSpecimen		32-033527					bombiformis	Amegilla bombiformis (Smith, 1854)		male	1	-27.4667	153.017					QLD	Brisbane			T.C. Marshall	Australia							https://doi.org/10.3897/zookeys.908.47375	SAMA
preservedSpecimen		32-033532					bombiformis	Amegilla bombiformis (Smith, 1854)		male	1	-27.4667	153.017					QLD	Brisbane	1923-02-08			Australia							https://doi.org/10.3897/zookeys.908.47375	SAMA
preservedSpecimen		32-033536					bombiformis	Amegilla bombiformis (Smith, 1854)		female	1	-27.4667	153.017					QLD	Brisbane			T.C. Marshall	Australia							https://doi.org/10.3897/zookeys.908.47375	SAMA
preservedSpecimen		32-036285					bombiformis	Amegilla bombiformis (Smith, 1854)		male	1	-27.482	153.02					QLD	Brisbane, West End, Vulture Rd	2013-11-07		R.Leijs&K.Hogendoorn	Australia							https://doi.org/10.3897/zookeys.908.47375	SAMA
preservedSpecimen		32-033554					scoparia n.sp.	Amegilla scoparia Leijs, 2020		male	1	-31.9594	141.462					NSW	Broken Hill	1960-06-04		R. Hmew	Australia							https://doi.org/10.3897/zookeys.908.47375	SAMA
preservedSpecimen		32-033526					bombiformis	Amegilla bombiformis (Smith, 1854)		female	1							PNG	Bulolo	1989-12-22		G. Furness	Papua New Guinea							https://doi.org/10.3897/zookeys.908.47375	SAMA
preservedSpecimen		32-033524					albiceps	Amegilla albiceps (Rayment, 1951)		male	1	-35.1154	138.633					SA	Clarendon	1938-02-01		E. Ashby	Australia							https://doi.org/10.3897/zookeys.908.47375	SAMA
preservedSpecimen		32-033587					albigenella	Amegilla albigenella Michener, 1965		male	1	-29.7857	134.152					SA	Commonwealth Hill 45 Bore	2002-10-18		R. Leijs & D. Peani	Australia							https://doi.org/10.3897/zookeys.908.47375	SAMA
preservedSpecimen		32-033588					scoparia n.sp.	Amegilla scoparia Leijs, 2020		female	1	-29.7857	134.152					SA	Commonwealth Hill 45 Bore	2002-10-19		R. Leijs & D. Peani	Australia							https://doi.org/10.3897/zookeys.908.47375	SAMA
preservedSpecimen		32-033531					bombiformis	Amegilla bombiformis (Smith, 1854)		female	1	-30.3333	152.701					QLD	Dorrigo			W. Heron	Australia							https://doi.org/10.3897/zookeys.908.47375	SAMA
preservedSpecimen		32-033537					bombiformis	Amegilla bombiformis (Smith, 1854)		female	1	-30.3333	152.701						Dorrigo			W. Heron	Australia							https://doi.org/10.3897/zookeys.908.47375	SAMA
preservedSpecimen		32-033534					bombiformis	Amegilla bombiformis (Smith, 1854)		female	1							PNG	Finch Haven			Rev. L. Wagner	Papua New Guinea							https://doi.org/10.3897/zookeys.908.47375	SAMA
preservedSpecimen		32-002053					griseocincta n.sp.	Amegilla griseocincta Leijs, 2020		male	1	-30.6175	139.402					SA	Gammon Rg NP between Lake Frome and Balcanoona	1989-05-09		J.A. Forrest	Australia							https://doi.org/10.3897/zookeys.908.47375	SAMA
preservedSpecimen		32-033615					scoparia n.sp.	Amegilla scoparia Leijs, 2020		female	1	-28.9503	130.144					SA	Great Victoria Desert	2015-09-01		R. Leijs	Australia							https://doi.org/10.3897/zookeys.908.47375	SAMA		paratype
preservedSpecimen		32-033616					scoparia n.sp.	Amegilla scoparia Leijs, 2020		female	1	-28.9503	130.144					SA	Great Victoria Desert	2015-09-01		R. Leijs	Australia							https://doi.org/10.3897/zookeys.908.47375	SAMA		paratype
preservedSpecimen		32-033617					scoparia n.sp.	Amegilla scoparia Leijs, 2020		female	1	-28.9503	130.144					SA	Great Victoria Desert	2015-09-01		R. Leijs	Australia							https://doi.org/10.3897/zookeys.908.47375	SAMA		paratype
preservedSpecimen		32-036278					scoparia n.sp.	Amegilla scoparia Leijs, 2020		male	1	-29.3329	130.197					SA	Great Victoria Desert	2015-08-26		R. Leijs	Australia							https://doi.org/10.3897/zookeys.908.47375	SAMA		paratype
preservedSpecimen		32-036279					scoparia n.sp.	Amegilla scoparia Leijs, 2020		female	1	-29.0067	130.26					SA	Great Victoria Desert	2015-08-26		R. Leijs	Australia							https://doi.org/10.3897/zookeys.908.47375	SAMA		paratype
preservedSpecimen		32-033550					albiceps	Amegilla albiceps (Rayment, 1951)		male	1	-34.0824	138.516					VIC	Halbury			A.D. Connan	Australia							https://doi.org/10.3897/zookeys.908.47375	SAMA
preservedSpecimen		32-033547					scoparia n.sp.	Amegilla scoparia Leijs, 2020		male	1	-26.7333	134.983					SA	Hamilton Ck	1992-08-22		P.R. Birks	Australia							https://doi.org/10.3897/zookeys.908.47375	SAMA
preservedSpecimen		32-033548					scoparia n.sp.	Amegilla scoparia Leijs, 2020		male	1	-26.7333	134.983					SA	Hamilton Ck	1992-08-22		P.R. Birks	Australia							https://doi.org/10.3897/zookeys.908.47375	SAMA
preservedSpecimen		32-033608					griseocincta n.sp.	Amegilla griseocincta Leijs, 2020		female	1	-24.4415	133.336					NT	Henbury Station	2013-05-18		R.Leijs&K.Hogendoorn	Australia							https://doi.org/10.3897/zookeys.908.47375	SAMA		Allotype
preservedSpecimen		32-033609					griseocincta n.sp.	Amegilla griseocincta Leijs, 2020		male	1	-24.598	133.503					NT	Henbury Station Gloaming Dam	2013-05-22		R.Leijs&K.Hogendoorn	Australia							https://doi.org/10.3897/zookeys.908.47375	SAMA		holotype
preservedSpecimen		32-033558					flava	Amegilla flava (Friese, 1911)		male	1								Keuvel East (?)	25/10/1889		Jus. Hillviet	Australia							https://doi.org/10.3897/zookeys.908.47375	SAMA
preservedSpecimen		32-033559					flava	Amegilla flava (Friese, 1911)		male	1								Keuvel East (?)	25/10/1889		Jus. Hillviet	Australia							https://doi.org/10.3897/zookeys.908.47375	SAMA
preservedSpecimen		32-002672					nitidiventris n.sp.	Amegilla nitidiventris Leijs, 2020		f	1	-15.5583	144.446					Qld	Laura General Store	2017-03-15		R. Leijs	Australia							https://doi.org/10.3897/zookeys.908.47375	SAMA		paratype
preservedSpecimen		32-002673					nitidiventris n.sp.	Amegilla nitidiventris Leijs, 2020		f	1	-15.5583	144.446					Qld	Laura General Store	2017-03-15		R. Leijs	Australia							https://doi.org/10.3897/zookeys.908.47375	SAMA		paratype
preservedSpecimen		32-002674					nitidiventris n.sp.	Amegilla nitidiventris Leijs, 2020		m	1	-15.5583	144.446					Qld	Laura General Store	2017-03-11		R. Leijs	Australia							https://doi.org/10.3897/zookeys.908.47375	SAMA		paratype
preservedSpecimen		32-002676					nitidiventris n.sp.	Amegilla nitidiventris Leijs, 2020		m	1	-15.5583	144.446					Qld	Laura General Store	2017-03-15		R. Leijs	Australia							https://doi.org/10.3897/zookeys.908.47375	SAMA		paratype
preservedSpecimen		32-002677					nitidiventris n.sp.	Amegilla nitidiventris Leijs, 2020		m	1	-15.5583	144.446					Qld	Laura General Store	2017-03-15		R. Leijs	Australia							https://doi.org/10.3897/zookeys.908.47375	SAMA		paratype
preservedSpecimen		32-002679					nitidiventris n.sp.	Amegilla nitidiventris Leijs, 2020		f	1	-15.5583	144.446					Qld	Laura General Store	2017-03-15		R. Leijs	Australia							https://doi.org/10.3897/zookeys.908.47375	SAMA		paratype
preservedSpecimen		32-002680					nitidiventris n.sp.	Amegilla nitidiventris Leijs, 2020		m	1	-15.5583	144.446					Qld	Laura General Store	2017-03-15		R. Leijs	Australia							https://doi.org/10.3897/zookeys.908.47375	SAMA		paratype
preservedSpecimen		32-002670					nitidiventris n.sp.	Amegilla nitidiventris Leijs, 2020		f	1	-15.5657	144.449					Qld	Laura Roadhouse	2017-03-06		R. Leijs	Australia							https://doi.org/10.3897/zookeys.908.47375	SAMA		paratype
preservedSpecimen		32-002671					nitidiventris n.sp.	Amegilla nitidiventris Leijs, 2020		f	1	-15.5657	144.449					Qld	Laura Roadhouse	2017-03-12		R. Leijs	Australia							https://doi.org/10.3897/zookeys.908.47375	SAMA		paratype
preservedSpecimen		32-002675					nitidiventris n.sp.	Amegilla nitidiventris Leijs, 2020		m	1	-15.5657	144.449					Qld	Laura Roadhouse	2017-03-12		R. Leijs	Australia							https://doi.org/10.3897/zookeys.908.47375	SAMA		paratype
preservedSpecimen		32-002681					nitidiventris n.sp.	Amegilla nitidiventris Leijs, 2020		m	1	-15.5657	144.449					Qld	Laura Roadhouse	2017-03-10		R. Leijs	Australia							https://doi.org/10.3897/zookeys.908.47375	SAMA		paratype
preservedSpecimen		32-033601					youngi n.sp.	Amegilla youngi Leijs, 2020		female	1	-13.481	130.699					NT	Litchfield	2006-02-18		D.A.Young	Australia							https://doi.org/10.3897/zookeys.908.47375	SAMA		holotype
preservedSpecimen		32-033561					flava	Amegilla flava (Friese, 1911)		female	1							SA	locality?	9/2/1880			Australia							https://doi.org/10.3897/zookeys.908.47375	SAMA
preservedSpecimen		32-036290					albiceps	Amegilla albiceps (Rayment, 1951)		male	1	-34.8657	143.344					VIC	Major Mitchell Lagoon	2007-01-07		R.Leijs&K.Hogendoorn	Australia							https://doi.org/10.3897/zookeys.908.47375	SAMA
preservedSpecimen		32-033600					scoparia n.sp.	Amegilla scoparia Leijs, 2020		female	1	-29.6457	138.07					SA	Maree	2018-08-09		G.P. Beaver	Australia							https://doi.org/10.3897/zookeys.908.47375	SAMA
preservedSpecimen		32-033542					scoparia n.sp.	Amegilla scoparia Leijs, 2020		female	1	-29.6917	121.025					WA	Menzies			N.G. Stores	Australia							https://doi.org/10.3897/zookeys.908.47375	SAMA
preservedSpecimen		32-033528					bombiformis	Amegilla bombiformis (Smith, 1854)		male	1	-26.6919	152.896					QLD	Montville	1930-02-06			Australia							https://doi.org/10.3897/zookeys.908.47375	SAMA
preservedSpecimen		32-033529					bombiformis	Amegilla bombiformis (Smith, 1854)		female	1	-26.6919	152.896					QLD	Montville	1930-02-06			Australia							https://doi.org/10.3897/zookeys.908.47375	SAMA
preservedSpecimen		32-033530					bombiformis	Amegilla bombiformis (Smith, 1854)		female	1	-26.6919	152.896					QLD	Montville	1930-02-06			Australia							https://doi.org/10.3897/zookeys.908.47375	SAMA
preservedSpecimen		32-033553					rhodoscymna	Amegilla rhodoscymna (Cockerell, 1905)		male	1	-26.6919	152.896					QLD	Montville	1930-02-06			Australia							https://doi.org/10.3897/zookeys.908.47375	SAMA
preservedSpecimen		32-033538					scoparia n.sp.	Amegilla scoparia Leijs, 2020		male	1	-30.1722	135.665					SA	Mt Eba to Stuarts Sn	1904-05-25		H.V.Z. Braun(?)	Australia							https://doi.org/10.3897/zookeys.908.47375	SAMA
preservedSpecimen		32-033539					scoparia n.sp.	Amegilla scoparia Leijs, 2020		male	1	-30.1722	135.665					SA	Mt Eba to Stuarts Sn	1904-05-25		H.V.Z. Braun(?)	Australia							https://doi.org/10.3897/zookeys.908.47375	SAMA
preservedSpecimen		32-033551					calva	Amegilla calva (Rayment, 1935)		female	1	-27.0204	129.894					SA	Mt Lindsay (Wartaru)	1996-10-21		Pitlands survey, J.A. Forrest	Australia							https://doi.org/10.3897/zookeys.908.47375	SAMA
preservedSpecimen		32-033543					scoparia n.sp.	Amegilla scoparia Leijs, 2020		female	1	-26.2271	127.456					WA	Mt Squiries(?)	27/8/1891		R. Helms(?)	Australia							https://doi.org/10.3897/zookeys.908.47375	SAMA
preservedSpecimen		32-036286					bombiformis	Amegilla bombiformis (Smith, 1854)		male	1	-27.9667	153.183						Mt Tamborine	1997-02-22		R.Leijs	Australia							https://doi.org/10.3897/zookeys.908.47375	SAMA
preservedSpecimen		32-033545					scoparia n.sp.	Amegilla scoparia Leijs, 2020		male	1	-29.5891	139.061					SA	Murnpeowie St	1953-08-27		G.F. Gross	Australia							https://doi.org/10.3897/zookeys.908.47375	SAMA
preservedSpecimen		32-033546					scoparia n.sp.	Amegilla scoparia Leijs, 2020		male	1	-29.5891	139.061					SA	Murnpeowie St	1953-08-27		G.F. Gross	Australia							https://doi.org/10.3897/zookeys.908.47375	SAMA
preservedSpecimen		32-036284					rhodoscymna	Amegilla rhodoscymna (Cockerell, 1905)		female	1	-10.7501	142.609					QLD	near Jardine's Well	2007-06-29		R.Leijs	Australia							https://doi.org/10.3897/zookeys.908.47375	SAMA
preservedSpecimen		32-036288					flava	Amegilla flava (Friese, 1911)		female	1	-33.4689	135.159					SA	near Mt Wedge	2007-12-19		R. & P. Leijs	Australia							https://doi.org/10.3897/zookeys.908.47375	SAMA
preservedSpecimen		32-036289					flava	Amegilla flava (Friese, 1911)		male	1	-33.4689	135.159					SA	near Mt Wedge	2007-12-19		R. & P. Leijs	Australia							https://doi.org/10.3897/zookeys.908.47375	SAMA
preservedSpecimen		32-033549					flava	Amegilla flava (Friese, 1911)		female	1	-35.6435	140.387					SA	Ngarket CP 4 km S of Box Flat	1992-03-18		E.G. Mathews & J.A. Forrest	Australia							https://doi.org/10.3897/zookeys.908.47375	SAMA
preservedSpecimen		32-033541					scoparia n.sp.	Amegilla scoparia Leijs, 2020		male	1	-32.2778	140.327					SA	Olary	16/11/1889		G.R. Howden	Australia							https://doi.org/10.3897/zookeys.908.47375	SAMA
preservedSpecimen		32-033555					calva	Amegilla calva (Rayment, 1935)		male	1	-30.4449	138.949					SA	Owieandana, N Flinders Ra	1924-11-01		Hale & Tindale	Australia							https://doi.org/10.3897/zookeys.908.47375	SAMA
preservedSpecimen		32-033607					griseocincta n.sp.	Amegilla griseocincta Leijs, 2020		male	1	-32.463	137.743					SA	Port Augusta arid garden	2015-03-13		R. Leijs	Australia							https://doi.org/10.3897/zookeys.908.47375	SAMA
preservedSpecimen		32-033610					scoparia n.sp.	Amegilla scoparia Leijs, 2020		female	1	-32.463	137.743					SA	Port Augusta arid garden	2014-09-25		R. Leijs	Australia							https://doi.org/10.3897/zookeys.908.47375	SAMA		paratype
preservedSpecimen		32-033611					scoparia n.sp.	Amegilla scoparia Leijs, 2020		female	1	-32.463	137.743					SA	Port Augusta arid garden	2014-09-25		R. Leijs	Australia							https://doi.org/10.3897/zookeys.908.47375	SAMA		paratype
preservedSpecimen		32-033612					scoparia n.sp.	Amegilla scoparia Leijs, 2020		female	1	-32.463	137.743					SA	Port Augusta arid garden	2014-09-25		R. Leijs	Australia							https://doi.org/10.3897/zookeys.908.47375	SAMA		paratype
preservedSpecimen		32-033544					scoparia n.sp.	Amegilla scoparia Leijs, 2020		female	1							SA	SW of SA			H. Basedow	Australia							https://doi.org/10.3897/zookeys.908.47375	SAMA
preservedSpecimen		32-033560					flava	Amegilla flava (Friese, 1911)		female	1								Sydney ??				Australia							https://doi.org/10.3897/zookeys.908.47375	SAMA
preservedSpecimen		32-033598					albigenella	Amegilla albigenella Michener, 1965		male	1	-27.2558	117.434					WA	Walbo Rock	2005-10-18		R.Leijs	Australia							https://doi.org/10.3897/zookeys.908.47375	SAMA
preservedSpecimen		32-002682					crenata n.sp.	Amegilla crenata Leijs, 2020		male	1	14.1347	134.187					NT	Wongalara ST, Australian Wildlife Conservacy	2012-05-31		M.Braby	Australia							https://doi.org/10.3897/zookeys.908.47375	SAMA
preservedSpecimen		32-002683					crenata n.sp.	Amegilla crenata Leijs, 2020		female	1	-14.2042	134.188					NT	Wongalara ST, Australian Wildlife Conservacy	2012-05-30		R.Leijs	Australia							https://doi.org/10.3897/zookeys.908.47375	SAMA
preservedSpecimen		32-002684					crenata n.sp.	Amegilla crenata Leijs, 2020		male	1	-14.2042	134.188					NT	Wongalara ST, Australian Wildlife Conservacy	2012-05-30		R.Leijs	Australia							https://doi.org/10.3897/zookeys.908.47375	SAMA		holotype
preservedSpecimen		32-002685					crenata n.sp.	Amegilla crenata Leijs, 2020		female	1	-14.2042	134.188					NT	Wongalara ST, Australian Wildlife Conservacy	2012-05-30		R.Leijs	Australia							https://doi.org/10.3897/zookeys.908.47375	SAMA		Allotype
preservedSpecimen		32-033517					albiceps	Amegilla albiceps (Rayment, 1951)		male	1	-32.5772	139.564					SA	Yunta	1971-02-01		T.F. Houston	Australia							https://doi.org/10.3897/zookeys.908.47375	SAMA
preservedSpecimen		32-033518					albiceps	Amegilla albiceps (Rayment, 1951)		male	1	-32.5772	139.564					SA	Yunta	1971-02-01		T.F. Houston	Australia							https://doi.org/10.3897/zookeys.908.47375	SAMA
preservedSpecimen		32-033519					albiceps	Amegilla albiceps (Rayment, 1951)		male	1	-32.5772	139.564					SA	Yunta	1971-02-01		T.F. Houston	Australia							https://doi.org/10.3897/zookeys.908.47375	SAMA
preservedSpecimen		32-033520					albiceps	Amegilla albiceps (Rayment, 1951)		female	1	-32.5772	139.564					SA	Yunta	1971-02-01		T.F. Houston	Australia							https://doi.org/10.3897/zookeys.908.47375	SAMA
preservedSpecimen		32-033533					bombiformis	Amegilla bombiformis (Smith, 1854)		female	1							NSW					Australia							https://doi.org/10.3897/zookeys.908.47375	SAMA
preservedSpecimen		32-033535					bombiformis	Amegilla bombiformis (Smith, 1854)		female	1							QLD					Australia							https://doi.org/10.3897/zookeys.908.47375	SAMA
preservedSpecimen		32-033556					flava	Amegilla flava (Friese, 1911)		male	1							SA					Australia							https://doi.org/10.3897/zookeys.908.47375	SAMA
preservedSpecimen		32-033557					flava	Amegilla flava (Friese, 1911)		male	1							SA					Australia							https://doi.org/10.3897/zookeys.908.47375	SAMA
preservedSpecimen		35799					bombiformis	Amegilla bombiformis (Smith, 1854)		female	1	-27.4667	153.017					QLD	Brisbane	1954-04-03			Australia							https://doi.org/10.3897/zookeys.908.47375	VM
preservedSpecimen		35904					bombiformis	Amegilla bombiformis (Smith, 1854)		male	1	-27.4667	153.017					QLD	Brisbane	1923-02-09			Australia							https://doi.org/10.3897/zookeys.908.47375	VM
preservedSpecimen		42612					dawsoni	Amegilla dawsoni (Rayment, 1951)		female	1	-24.8167	114.367					WA	75km E Carnarvon	1997-09-25		K. Sparks & K. Walker	Australia							https://doi.org/10.3897/zookeys.908.47375	VM
preservedSpecimen		42613					dawsoni	Amegilla dawsoni (Rayment, 1951)		female	1	-24.8167	114.367					WA	75km E Carnarvon	1997-09-25		K. Sparks & K. Walker	Australia							https://doi.org/10.3897/zookeys.908.47375	VM
preservedSpecimen		42650					dawsoni	Amegilla dawsoni (Rayment, 1951)		female	1	-24.8167	114.367					WA	75km E Carnarvon	1997-09-25		K. Sparks & K. Walker	Australia							https://doi.org/10.3897/zookeys.908.47375	VM
preservedSpecimen		35362									1	-10.1667	142.25					QLD	Banks (Moa) Island Torres Strait	1969-06-01			Australia							https://doi.org/10.3897/zookeys.908.47375	VM
preservedSpecimen		35955					preissi	Amegilla preissi (Cockerell, 1910)		male	1	-33.5667	115.85					WA	Beelerup	1957-02-25			Australia							https://doi.org/10.3897/zookeys.908.47375	VM
preservedSpecimen		35956					preissi	Amegilla preissi (Cockerell, 1910)		male	1	-33.5667	115.85					WA	Beelerup	1957-02-25			Australia							https://doi.org/10.3897/zookeys.908.47375	VM
preservedSpecimen		35957					preissi	Amegilla preissi (Cockerell, 1910)		male	1	-33.5667	115.85					WA	Beelerup	1957-02-25			Australia							https://doi.org/10.3897/zookeys.908.47375	VM
preservedSpecimen		35958					preissi	Amegilla preissi (Cockerell, 1910)		male	1	-33.5667	115.85					WA	Beelerup	1957-02-25			Australia							https://doi.org/10.3897/zookeys.908.47375	VM
preservedSpecimen		35959					preissi	Amegilla preissi (Cockerell, 1910)		male	1	-33.5667	115.85					WA	Beelerup	1957-02-25			Australia							https://doi.org/10.3897/zookeys.908.47375	VM
preservedSpecimen		35960					preissi	Amegilla preissi (Cockerell, 1910)		male	1	-33.5667	115.85					WA	Beelerup	1957-02-25			Australia							https://doi.org/10.3897/zookeys.908.47375	VM
preservedSpecimen		35961					preissi	Amegilla preissi (Cockerell, 1910)		male	1	-33.5667	115.85					WA	Beelerup	1957-02-25			Australia							https://doi.org/10.3897/zookeys.908.47375	VM
preservedSpecimen		35962					preissi	Amegilla preissi (Cockerell, 1910)		male	1	-33.5667	115.85					WA	Beelerup	1958-02-25			Australia							https://doi.org/10.3897/zookeys.908.47375	VM
preservedSpecimen		35968					preissi	Amegilla preissi (Cockerell, 1910)		female	1	-33.5667	115.85					WA	Beelerup	1957-02-25			Australia							https://doi.org/10.3897/zookeys.908.47375	VM
preservedSpecimen		35969					preissi	Amegilla preissi (Cockerell, 1910)		female	1	-33.5667	115.85					WA	Beelerup	1957-02-25			Australia							https://doi.org/10.3897/zookeys.908.47375	VM
preservedSpecimen		35970					preissi	Amegilla preissi (Cockerell, 1910)		female	1	-33.5667	115.85					WA	Beelerup	1957-02-25			Australia							https://doi.org/10.3897/zookeys.908.47375	VM
preservedSpecimen		35971					preissi	Amegilla preissi (Cockerell, 1910)		female	1	-33.5667	115.85					WA	Beelerup	1957-02-25			Australia							https://doi.org/10.3897/zookeys.908.47375	VM
preservedSpecimen		35972					preissi	Amegilla preissi (Cockerell, 1910)		female	1	-33.5667	115.85					WA	Beelerup	1957-02-25			Australia							https://doi.org/10.3897/zookeys.908.47375	VM
preservedSpecimen		35973					preissi	Amegilla preissi (Cockerell, 1910)		female	1	-33.5667	115.85					WA	Beelerup	1957-02-25			Australia							https://doi.org/10.3897/zookeys.908.47375	VM
preservedSpecimen		35974					preissi	Amegilla preissi (Cockerell, 1910)		female	1	-33.5667	115.85					WA	Beelerup	1957-02-25			Australia							https://doi.org/10.3897/zookeys.908.47375	VM
preservedSpecimen		35975					preissi	Amegilla preissi (Cockerell, 1910)		female	1	-33.5667	115.85					WA	Beelerup	1957-02-25			Australia							https://doi.org/10.3897/zookeys.908.47375	VM
preservedSpecimen		35976					preissi	Amegilla preissi (Cockerell, 1910)		female	1	-33.5667	115.85					WA	Beelerup	1957-02-25			Australia							https://doi.org/10.3897/zookeys.908.47375	VM
preservedSpecimen		36208					preissi	Amegilla preissi (Cockerell, 1910)		male	1	-33.5667	115.85					WA	Beelerup	1957-02-25			Australia							https://doi.org/10.3897/zookeys.908.47375	VM
preservedSpecimen		35901					bombiformis	Amegilla bombiformis (Smith, 1854)		male	1	-33.0333	151.667					NSW	Belmont	1946-12-23			Australia							https://doi.org/10.3897/zookeys.908.47375	VM
preservedSpecimen		35823					bombiformis	Amegilla bombiformis (Smith, 1854)		female	1	-30.35	153.1					NSW	Boambee	1952-03-25			Australia							https://doi.org/10.3897/zookeys.908.47375	VM
preservedSpecimen		35731					bombiformis	Amegilla bombiformis (Smith, 1854)		female	1	-27.4667	153.017					QLD	Brisbane	1954-03-27			Australia							https://doi.org/10.3897/zookeys.908.47375	VM
preservedSpecimen		35732					bombiformis	Amegilla bombiformis (Smith, 1854)		female	1	-27.4667	153.017					QLD	Brisbane	1954-03-20			Australia							https://doi.org/10.3897/zookeys.908.47375	VM
preservedSpecimen		35734					bombiformis	Amegilla bombiformis (Smith, 1854)		female	1	-27.4667	153.017					QLD	Brisbane	1923-03-02			Australia							https://doi.org/10.3897/zookeys.908.47375	VM
preservedSpecimen		35735					bombiformis	Amegilla bombiformis (Smith, 1854)		female	1	-27.4667	153.017					QLD	Brisbane	1953-11-10			Australia							https://doi.org/10.3897/zookeys.908.47375	VM
preservedSpecimen		35736					bombiformis	Amegilla bombiformis (Smith, 1854)		male	1	-27.4667	153.017					QLD	Brisbane	1923-01-20			Australia							https://doi.org/10.3897/zookeys.908.47375	VM
preservedSpecimen		35737					bombiformis	Amegilla bombiformis (Smith, 1854)		male	1	-27.4667	153.017					QLD	Brisbane	1954-03-20			Australia							https://doi.org/10.3897/zookeys.908.47375	VM
preservedSpecimen		35738					bombiformis	Amegilla bombiformis (Smith, 1854)		female	1	-27.4667	153.017					QLD	Brisbane	1953-11-10			Australia							https://doi.org/10.3897/zookeys.908.47375	VM
preservedSpecimen		35739					bombiformis	Amegilla bombiformis (Smith, 1854)		female	1	-27.4667	153.017					QLD	Brisbane	1954-03-13			Australia							https://doi.org/10.3897/zookeys.908.47375	VM
preservedSpecimen		35740					bombiformis	Amegilla bombiformis (Smith, 1854)		male	1	-27.4667	153.017					QLD	Brisbane	1954-03-27			Australia							https://doi.org/10.3897/zookeys.908.47375	VM
preservedSpecimen		35741					bombiformis	Amegilla bombiformis (Smith, 1854)		female	1	-27.4667	153.017					QLD	Brisbane	1954-03-27			Australia							https://doi.org/10.3897/zookeys.908.47375	VM
preservedSpecimen		35742					bombiformis	Amegilla bombiformis (Smith, 1854)		female	1	-27.4667	153.017					QLD	Brisbane	1954-04-01			Australia							https://doi.org/10.3897/zookeys.908.47375	VM
preservedSpecimen		35743					bombiformis	Amegilla bombiformis (Smith, 1854)		female	1	-27.4667	153.017					QLD	Brisbane	1954-04-01			Australia							https://doi.org/10.3897/zookeys.908.47375	VM
preservedSpecimen		35744					bombiformis	Amegilla bombiformis (Smith, 1854)		female	1	-27.4667	153.017					QLD	Brisbane	1954-04-01			Australia							https://doi.org/10.3897/zookeys.908.47375	VM
preservedSpecimen		35745					bombiformis	Amegilla bombiformis (Smith, 1854)		female	1	-27.4667	153.017					QLD	Brisbane	1954-04-01			Australia							https://doi.org/10.3897/zookeys.908.47375	VM
preservedSpecimen		35746					bombiformis	Amegilla bombiformis (Smith, 1854)		female	1	-27.4667	153.017					QLD	Brisbane	1954-04-03			Australia							https://doi.org/10.3897/zookeys.908.47375	VM
preservedSpecimen		35747					bombiformis	Amegilla bombiformis (Smith, 1854)		female	1	-27.4667	153.017					QLD	Brisbane	1954-04-03			Australia							https://doi.org/10.3897/zookeys.908.47375	VM
preservedSpecimen		35748					bombiformis	Amegilla bombiformis (Smith, 1854)		female	1	-27.4667	153.017					QLD	Brisbane	1954-04-03			Australia							https://doi.org/10.3897/zookeys.908.47375	VM
preservedSpecimen		35749					bombiformis	Amegilla bombiformis (Smith, 1854)		female	1	-27.4667	153.017					QLD	Brisbane	1954-04-03			Australia							https://doi.org/10.3897/zookeys.908.47375	VM
preservedSpecimen		35750					bombiformis	Amegilla bombiformis (Smith, 1854)		female	1	-27.4667	153.017					QLD	Brisbane	1954-04-03			Australia							https://doi.org/10.3897/zookeys.908.47375	VM
preservedSpecimen		35751					bombiformis	Amegilla bombiformis (Smith, 1854)		female	1	-27.4667	153.017					QLD	Brisbane	1954-04-03			Australia							https://doi.org/10.3897/zookeys.908.47375	VM
preservedSpecimen		35752					bombiformis	Amegilla bombiformis (Smith, 1854)		female	1	-27.4667	153.017					QLD	Brisbane	1954-04-03			Australia							https://doi.org/10.3897/zookeys.908.47375	VM
preservedSpecimen		35753					bombiformis	Amegilla bombiformis (Smith, 1854)		female	1	-27.4667	153.017					QLD	Brisbane	1954-04-03			Australia							https://doi.org/10.3897/zookeys.908.47375	VM
preservedSpecimen		35754					bombiformis	Amegilla bombiformis (Smith, 1854)		female	1	-27.4667	153.017					QLD	Brisbane	1954-03-21			Australia							https://doi.org/10.3897/zookeys.908.47375	VM
preservedSpecimen		35755					bombiformis	Amegilla bombiformis (Smith, 1854)		male	1	-27.4667	153.017					QLD	Brisbane	1954-03-21			Australia							https://doi.org/10.3897/zookeys.908.47375	VM
preservedSpecimen		35756					bombiformis	Amegilla bombiformis (Smith, 1854)		female	1	-27.4667	153.017					QLD	Brisbane	1954-03-21			Australia							https://doi.org/10.3897/zookeys.908.47375	VM
preservedSpecimen		35757					bombiformis	Amegilla bombiformis (Smith, 1854)		female	1	-27.4667	153.017					QLD	Brisbane	1954-03-21			Australia							https://doi.org/10.3897/zookeys.908.47375	VM
preservedSpecimen		35758					bombiformis	Amegilla bombiformis (Smith, 1854)		male	1	-27.4667	153.017					QLD	Brisbane	1954-03-21			Australia							https://doi.org/10.3897/zookeys.908.47375	VM
preservedSpecimen		35763					bombiformis	Amegilla bombiformis (Smith, 1854)		male	1	-27.4667	153.017					QLD	Brisbane	1954-03-27			Australia							https://doi.org/10.3897/zookeys.908.47375	VM
preservedSpecimen		35764					bombiformis	Amegilla bombiformis (Smith, 1854)		male	1	-27.4667	153.017					QLD	Brisbane	1954-03-27			Australia							https://doi.org/10.3897/zookeys.908.47375	VM
preservedSpecimen		35765					bombiformis	Amegilla bombiformis (Smith, 1854)		female	1	-27.4667	153.017					QLD	Brisbane	1954-03-20			Australia							https://doi.org/10.3897/zookeys.908.47375	VM
preservedSpecimen		35766					bombiformis	Amegilla bombiformis (Smith, 1854)		female	1	-27.4667	153.017					QLD	Brisbane	1954-03-20			Australia							https://doi.org/10.3897/zookeys.908.47375	VM
preservedSpecimen		35767					bombiformis	Amegilla bombiformis (Smith, 1854)		female	1	-27.4667	153.017					QLD	Brisbane	1954-03-27			Australia							https://doi.org/10.3897/zookeys.908.47375	VM
preservedSpecimen		35768					bombiformis	Amegilla bombiformis (Smith, 1854)		female	1	-27.4667	153.017					QLD	Brisbane	1954-03-27			Australia							https://doi.org/10.3897/zookeys.908.47375	VM
preservedSpecimen		35769					bombiformis	Amegilla bombiformis (Smith, 1854)		male	1	-27.4667	153.017					QLD	Brisbane	1954-03-27			Australia							https://doi.org/10.3897/zookeys.908.47375	VM
preservedSpecimen		35770					bombiformis	Amegilla bombiformis (Smith, 1854)		female	1	-27.4667	153.017					QLD	Brisbane	1954-04-03			Australia							https://doi.org/10.3897/zookeys.908.47375	VM
preservedSpecimen		35771					bombiformis	Amegilla bombiformis (Smith, 1854)		female	1	-27.4667	153.017					QLD	Brisbane	1954-04-03			Australia							https://doi.org/10.3897/zookeys.908.47375	VM
preservedSpecimen		35772					bombiformis	Amegilla bombiformis (Smith, 1854)		female	1	-27.4667	153.017					QLD	Brisbane	1954-04-03			Australia							https://doi.org/10.3897/zookeys.908.47375	VM
preservedSpecimen		35773					bombiformis	Amegilla bombiformis (Smith, 1854)		female	1	-27.4667	153.017					QLD	Brisbane	1954-04-03			Australia							https://doi.org/10.3897/zookeys.908.47375	VM
preservedSpecimen		35774					bombiformis	Amegilla bombiformis (Smith, 1854)		female	1	-27.4667	153.017					QLD	Brisbane	1954-04-03			Australia							https://doi.org/10.3897/zookeys.908.47375	VM
preservedSpecimen		35775					bombiformis	Amegilla bombiformis (Smith, 1854)		male	1	-27.4667	153.017					QLD	Brisbane	1954-04-03			Australia							https://doi.org/10.3897/zookeys.908.47375	VM
preservedSpecimen		35776					bombiformis	Amegilla bombiformis (Smith, 1854)		female	1	-27.4667	153.017					QLD	Brisbane	1955-04-11			Australia							https://doi.org/10.3897/zookeys.908.47375	VM
preservedSpecimen		35777					bombiformis	Amegilla bombiformis (Smith, 1854)		male	1	-27.4667	153.017					QLD	Brisbane	1955-04-11			Australia							https://doi.org/10.3897/zookeys.908.47375	VM
preservedSpecimen		35778					bombiformis	Amegilla bombiformis (Smith, 1854)		female	1	-27.4667	153.017					QLD	Brisbane	1954-03-20			Australia							https://doi.org/10.3897/zookeys.908.47375	VM
preservedSpecimen		35779					bombiformis	Amegilla bombiformis (Smith, 1854)		male	1	-27.4667	153.017					QLD	Brisbane	1923-03-02			Australia							https://doi.org/10.3897/zookeys.908.47375	VM
preservedSpecimen		35780					bombiformis	Amegilla bombiformis (Smith, 1854)		female	1	-27.4667	153.017					QLD	Brisbane	1956-01-25			Australia							https://doi.org/10.3897/zookeys.908.47375	VM
preservedSpecimen		35781					bombiformis	Amegilla bombiformis (Smith, 1854)		male	1	-27.4667	153.017					QLD	Brisbane	1954-03-14			Australia							https://doi.org/10.3897/zookeys.908.47375	VM
preservedSpecimen		35782					bombiformis	Amegilla bombiformis (Smith, 1854)		male	1	-27.4667	153.017					QLD	Brisbane	1954-03-13			Australia							https://doi.org/10.3897/zookeys.908.47375	VM
preservedSpecimen		35783					bombiformis	Amegilla bombiformis (Smith, 1854)		male	1	-27.4667	153.017					QLD	Brisbane	1954-03-13			Australia							https://doi.org/10.3897/zookeys.908.47375	VM
preservedSpecimen		35784					bombiformis	Amegilla bombiformis (Smith, 1854)		male	1	-27.4667	153.017					QLD	Brisbane	1954-03-13			Australia							https://doi.org/10.3897/zookeys.908.47375	VM
preservedSpecimen		35785					bombiformis	Amegilla bombiformis (Smith, 1854)		female	1	-27.4667	153.017					QLD	Brisbane	1955-04-30			Australia							https://doi.org/10.3897/zookeys.908.47375	VM
preservedSpecimen		35786					bombiformis	Amegilla bombiformis (Smith, 1854)		female	1	-27.4667	153.017					QLD	Brisbane	1955-04-30			Australia							https://doi.org/10.3897/zookeys.908.47375	VM
preservedSpecimen		35788					bombiformis	Amegilla bombiformis (Smith, 1854)		female	1	-27.4667	153.017					QLD	Brisbane	1955-04-30			Australia							https://doi.org/10.3897/zookeys.908.47375	VM
preservedSpecimen		35789					bombiformis	Amegilla bombiformis (Smith, 1854)		male	1	-27.4667	153.017					QLD	Brisbane	1954-03-21			Australia							https://doi.org/10.3897/zookeys.908.47375	VM
preservedSpecimen		35790					bombiformis	Amegilla bombiformis (Smith, 1854)		female	1	-27.4667	153.017					QLD	Brisbane	1954-04-01			Australia							https://doi.org/10.3897/zookeys.908.47375	VM
preservedSpecimen		35791					bombiformis	Amegilla bombiformis (Smith, 1854)		male	1	-27.4667	153.017					QLD	Brisbane	1923-02-05			Australia							https://doi.org/10.3897/zookeys.908.47375	VM
preservedSpecimen		35792					bombiformis	Amegilla bombiformis (Smith, 1854)		male	1	-27.4667	153.017					QLD	Brisbane	1923-02-26			Australia							https://doi.org/10.3897/zookeys.908.47375	VM
preservedSpecimen		35793					bombiformis	Amegilla bombiformis (Smith, 1854)		male	1	-27.4667	153.017					QLD	Brisbane	1923-02-08			Australia							https://doi.org/10.3897/zookeys.908.47375	VM
preservedSpecimen		35802					bombiformis	Amegilla bombiformis (Smith, 1854)		female	1	-27.4667	153.017					QLD	Brisbane	1954-03-20			Australia							https://doi.org/10.3897/zookeys.908.47375	VM
preservedSpecimen		35803					bombiformis	Amegilla bombiformis (Smith, 1854)		female	1	-27.4667	153.017					QLD	Brisbane	1954-03-27			Australia							https://doi.org/10.3897/zookeys.908.47375	VM
preservedSpecimen		35804					bombiformis	Amegilla bombiformis (Smith, 1854)		female	1	-27.4667	153.017					QLD	Brisbane	1955-04-11			Australia							https://doi.org/10.3897/zookeys.908.47375	VM
preservedSpecimen		35805					bombiformis	Amegilla bombiformis (Smith, 1854)		female	1	-27.4667	153.017					QLD	Brisbane	1955-04-11			Australia							https://doi.org/10.3897/zookeys.908.47375	VM
preservedSpecimen		35806					bombiformis	Amegilla bombiformis (Smith, 1854)		female	1	-27.4667	153.017					QLD	Brisbane	1955-04-11			Australia							https://doi.org/10.3897/zookeys.908.47375	VM
preservedSpecimen		35807					bombiformis	Amegilla bombiformis (Smith, 1854)		male	1	-27.4667	153.017					QLD	Brisbane	1955-04-17			Australia							https://doi.org/10.3897/zookeys.908.47375	VM
preservedSpecimen		35808					bombiformis	Amegilla bombiformis (Smith, 1854)		female	1	-27.4667	153.017					QLD	Brisbane	1955-04-17			Australia							https://doi.org/10.3897/zookeys.908.47375	VM
preservedSpecimen		35809					bombiformis	Amegilla bombiformis (Smith, 1854)		male	1	-27.4667	153.017					QLD	Brisbane	1954-03-13			Australia							https://doi.org/10.3897/zookeys.908.47375	VM
preservedSpecimen		35810					bombiformis	Amegilla bombiformis (Smith, 1854)		male	1	-27.4667	153.017					QLD	Brisbane	1954-03-13			Australia							https://doi.org/10.3897/zookeys.908.47375	VM
preservedSpecimen		35811					bombiformis	Amegilla bombiformis (Smith, 1854)		female	1	-27.4667	153.017					QLD	Brisbane	1954-03-13			Australia							https://doi.org/10.3897/zookeys.908.47375	VM
preservedSpecimen		35812					bombiformis	Amegilla bombiformis (Smith, 1854)		male	1	-27.4667	153.017					QLD	Brisbane	1954-03-13			Australia							https://doi.org/10.3897/zookeys.908.47375	VM
preservedSpecimen		35813					bombiformis	Amegilla bombiformis (Smith, 1854)		female	1	-27.4667	153.017					QLD	Brisbane	1954-03-13			Australia							https://doi.org/10.3897/zookeys.908.47375	VM
preservedSpecimen		35814					bombiformis	Amegilla bombiformis (Smith, 1854)		male	1	-27.4667	153.017					QLD	Brisbane	1954-03-07			Australia							https://doi.org/10.3897/zookeys.908.47375	VM
preservedSpecimen		35815					bombiformis	Amegilla bombiformis (Smith, 1854)		male	1	-27.4667	153.017					QLD	Brisbane	1954-03-14			Australia							https://doi.org/10.3897/zookeys.908.47375	VM
preservedSpecimen		35816					bombiformis	Amegilla bombiformis (Smith, 1854)		male	1	-27.4667	153.017					QLD	Brisbane	1954-03-21			Australia							https://doi.org/10.3897/zookeys.908.47375	VM
preservedSpecimen		35817					bombiformis	Amegilla bombiformis (Smith, 1854)		male	1	-27.4667	153.017					QLD	Brisbane	1954-03-21			Australia							https://doi.org/10.3897/zookeys.908.47375	VM
preservedSpecimen		35818					bombiformis	Amegilla bombiformis (Smith, 1854)		female	1	-27.4667	153.017					QLD	Brisbane	1954-03-27			Australia							https://doi.org/10.3897/zookeys.908.47375	VM
preservedSpecimen		35821					bombiformis	Amegilla bombiformis (Smith, 1854)		female	1	-27.4667	153.017					QLD	Brisbane	1955-04-30			Australia							https://doi.org/10.3897/zookeys.908.47375	VM
preservedSpecimen		35824					bombiformis	Amegilla bombiformis (Smith, 1854)		male	1	-27.4667	153.017					QLD	Brisbane	1923-02-28			Australia							https://doi.org/10.3897/zookeys.908.47375	VM
preservedSpecimen		35828					bombiformis	Amegilla bombiformis (Smith, 1854)		male	1	-27.4667	153.017					QLD	Brisbane	1923-03-10			Australia							https://doi.org/10.3897/zookeys.908.47375	VM
preservedSpecimen		35829					bombiformis	Amegilla bombiformis (Smith, 1854)		male	1	-27.4667	153.017					QLD	Brisbane	1923-03-02			Australia							https://doi.org/10.3897/zookeys.908.47375	VM
preservedSpecimen		35830					bombiformis	Amegilla bombiformis (Smith, 1854)		female	1	-27.4667	153.017					QLD	Brisbane	1923-03-16			Australia							https://doi.org/10.3897/zookeys.908.47375	VM
preservedSpecimen		35833					bombiformis	Amegilla bombiformis (Smith, 1854)		female	1	-27.4667	153.017					QLD	Brisbane	1954-04-01			Australia							https://doi.org/10.3897/zookeys.908.47375	VM
preservedSpecimen		35834					bombiformis	Amegilla bombiformis (Smith, 1854)		female	1	-27.4667	153.017					QLD	Brisbane	1954-04-01			Australia							https://doi.org/10.3897/zookeys.908.47375	VM
preservedSpecimen		35835					bombiformis	Amegilla bombiformis (Smith, 1854)		female	1	-27.4667	153.017					QLD	Brisbane	1954-04-01			Australia							https://doi.org/10.3897/zookeys.908.47375	VM
preservedSpecimen		35836					bombiformis	Amegilla bombiformis (Smith, 1854)		female	1	-27.4667	153.017					QLD	Brisbane	1954-04-01			Australia							https://doi.org/10.3897/zookeys.908.47375	VM
preservedSpecimen		35837					bombiformis	Amegilla bombiformis (Smith, 1854)		female	1	-27.4667	153.017					QLD	Brisbane	1954-04-01			Australia							https://doi.org/10.3897/zookeys.908.47375	VM
preservedSpecimen		35838					bombiformis	Amegilla bombiformis (Smith, 1854)		female	1	-27.4667	153.017					QLD	Brisbane	1954-03-20			Australia							https://doi.org/10.3897/zookeys.908.47375	VM
preservedSpecimen		35839					bombiformis	Amegilla bombiformis (Smith, 1854)		female	1	-27.4667	153.017					QLD	Brisbane	1954-03-20			Australia							https://doi.org/10.3897/zookeys.908.47375	VM
preservedSpecimen		35840					bombiformis	Amegilla bombiformis (Smith, 1854)		male	1	-27.4667	153.017					QLD	Brisbane	1954-03-20			Australia							https://doi.org/10.3897/zookeys.908.47375	VM
preservedSpecimen		35841					bombiformis	Amegilla bombiformis (Smith, 1854)		female	1	-27.4667	153.017					QLD	Brisbane	1954-03-20			Australia							https://doi.org/10.3897/zookeys.908.47375	VM
preservedSpecimen		35842					bombiformis	Amegilla bombiformis (Smith, 1854)		female	1	-27.4667	153.017					QLD	Brisbane	1954-03-20			Australia							https://doi.org/10.3897/zookeys.908.47375	VM
preservedSpecimen		35843					bombiformis	Amegilla bombiformis (Smith, 1854)		female	1	-27.4667	153.017					QLD	Brisbane	1954-03-21			Australia							https://doi.org/10.3897/zookeys.908.47375	VM
preservedSpecimen		35844					bombiformis	Amegilla bombiformis (Smith, 1854)		male	1	-27.4667	153.017					QLD	Brisbane	1954-03-21			Australia							https://doi.org/10.3897/zookeys.908.47375	VM
preservedSpecimen		35845					bombiformis	Amegilla bombiformis (Smith, 1854)		female	1	-27.4667	153.017					QLD	Brisbane	1954-04-03			Australia							https://doi.org/10.3897/zookeys.908.47375	VM
preservedSpecimen		35846					bombiformis	Amegilla bombiformis (Smith, 1854)		female	1	-27.4667	153.017					QLD	Brisbane	1954-04-03			Australia							https://doi.org/10.3897/zookeys.908.47375	VM
preservedSpecimen		35847					bombiformis	Amegilla bombiformis (Smith, 1854)		female	1	-27.4667	153.017					QLD	Brisbane	1954-03-27			Australia							https://doi.org/10.3897/zookeys.908.47375	VM
preservedSpecimen		35848					bombiformis	Amegilla bombiformis (Smith, 1854)		female	1	-27.4667	153.017					QLD	Brisbane	1954-03-27			Australia							https://doi.org/10.3897/zookeys.908.47375	VM
preservedSpecimen		35849					bombiformis	Amegilla bombiformis (Smith, 1854)		female	1	-27.4667	153.017					QLD	Brisbane	1954-03-27			Australia							https://doi.org/10.3897/zookeys.908.47375	VM
preservedSpecimen		35850					bombiformis	Amegilla bombiformis (Smith, 1854)		female	1	-27.4667	153.017					QLD	Brisbane	1954-03-27			Australia							https://doi.org/10.3897/zookeys.908.47375	VM
preservedSpecimen		35851					bombiformis	Amegilla bombiformis (Smith, 1854)		female	1	-27.4667	153.017					QLD	Brisbane	1954-03-27			Australia							https://doi.org/10.3897/zookeys.908.47375	VM
preservedSpecimen		35852					bombiformis	Amegilla bombiformis (Smith, 1854)		female	1	-27.4667	153.017					QLD	Brisbane	1954-03-27			Australia							https://doi.org/10.3897/zookeys.908.47375	VM
preservedSpecimen		35853					bombiformis	Amegilla bombiformis (Smith, 1854)		female	1	-27.4667	153.017					QLD	Brisbane	1954-04-04			Australia							https://doi.org/10.3897/zookeys.908.47375	VM
preservedSpecimen		35854					bombiformis	Amegilla bombiformis (Smith, 1854)		female	1	-27.4667	153.017					QLD	Brisbane	1955-04-30			Australia							https://doi.org/10.3897/zookeys.908.47375	VM
preservedSpecimen		35855					bombiformis	Amegilla bombiformis (Smith, 1854)		female	1	-27.4667	153.017					QLD	Brisbane	1955-04-30			Australia							https://doi.org/10.3897/zookeys.908.47375	VM
preservedSpecimen		35856					bombiformis	Amegilla bombiformis (Smith, 1854)		female	1	-27.4667	153.017					QLD	Brisbane	1955-04-30			Australia							https://doi.org/10.3897/zookeys.908.47375	VM
preservedSpecimen		35857					bombiformis	Amegilla bombiformis (Smith, 1854)		female	1	-27.4667	153.017					QLD	Brisbane	1955-04-30			Australia							https://doi.org/10.3897/zookeys.908.47375	VM
preservedSpecimen		35858					bombiformis	Amegilla bombiformis (Smith, 1854)		female	1	-27.4667	153.017					QLD	Brisbane	1955-04-11			Australia							https://doi.org/10.3897/zookeys.908.47375	VM
preservedSpecimen		35859					bombiformis	Amegilla bombiformis (Smith, 1854)		male	1	-27.4667	153.017					QLD	Brisbane	1955-04-11			Australia							https://doi.org/10.3897/zookeys.908.47375	VM
preservedSpecimen		35860					bombiformis	Amegilla bombiformis (Smith, 1854)		female	1	-27.4667	153.017					QLD	Brisbane	1955-04-11			Australia							https://doi.org/10.3897/zookeys.908.47375	VM
preservedSpecimen		35861					bombiformis	Amegilla bombiformis (Smith, 1854)		female	1	-27.4667	153.017					QLD	Brisbane	1955-04-11			Australia							https://doi.org/10.3897/zookeys.908.47375	VM
preservedSpecimen		35866					bombiformis	Amegilla bombiformis (Smith, 1854)		female	1	-27.4667	153.017					QLD	Brisbane	1955-04-11			Australia							https://doi.org/10.3897/zookeys.908.47375	VM
preservedSpecimen		35867					bombiformis	Amegilla bombiformis (Smith, 1854)		female	1	-27.4667	153.017					QLD	Brisbane	1955-04-11			Australia							https://doi.org/10.3897/zookeys.908.47375	VM
preservedSpecimen		35868					bombiformis	Amegilla bombiformis (Smith, 1854)		male	1	-27.4667	153.017					QLD	Brisbane	1955-04-11			Australia							https://doi.org/10.3897/zookeys.908.47375	VM
preservedSpecimen		35869					bombiformis	Amegilla bombiformis (Smith, 1854)		male	1	-27.4667	153.017					QLD	Brisbane	1955-04-11			Australia							https://doi.org/10.3897/zookeys.908.47375	VM
preservedSpecimen		35870					bombiformis	Amegilla bombiformis (Smith, 1854)		female	1	-27.4667	153.017					QLD	Brisbane	1955-04-11			Australia							https://doi.org/10.3897/zookeys.908.47375	VM
preservedSpecimen		35871					bombiformis	Amegilla bombiformis (Smith, 1854)		male	1	-27.4667	153.017					QLD	Brisbane	1955-04-11			Australia							https://doi.org/10.3897/zookeys.908.47375	VM
preservedSpecimen		35872					bombiformis	Amegilla bombiformis (Smith, 1854)		male	1	-27.4667	153.017					QLD	Brisbane	1955-04-11			Australia							https://doi.org/10.3897/zookeys.908.47375	VM
preservedSpecimen		35873					bombiformis	Amegilla bombiformis (Smith, 1854)		male	1	-27.4667	153.017					QLD	Brisbane	1955-04-11			Australia							https://doi.org/10.3897/zookeys.908.47375	VM
preservedSpecimen		35874					bombiformis	Amegilla bombiformis (Smith, 1854)		female	1	-27.4667	153.017					QLD	Brisbane	1955-04-11			Australia							https://doi.org/10.3897/zookeys.908.47375	VM
preservedSpecimen		35875					bombiformis	Amegilla bombiformis (Smith, 1854)		female	1	-27.4667	153.017					QLD	Brisbane	1954-03-27			Australia							https://doi.org/10.3897/zookeys.908.47375	VM
preservedSpecimen		35876					bombiformis	Amegilla bombiformis (Smith, 1854)		female	1	-27.4667	153.017					QLD	Brisbane	1954-03-27			Australia							https://doi.org/10.3897/zookeys.908.47375	VM
preservedSpecimen		35877					bombiformis	Amegilla bombiformis (Smith, 1854)		female	1	-27.4667	153.017					QLD	Brisbane	1954-03-27			Australia							https://doi.org/10.3897/zookeys.908.47375	VM
preservedSpecimen		35878					bombiformis	Amegilla bombiformis (Smith, 1854)		female	1	-27.4667	153.017					QLD	Brisbane	1954-03-27			Australia							https://doi.org/10.3897/zookeys.908.47375	VM
preservedSpecimen		35879					bombiformis	Amegilla bombiformis (Smith, 1854)		female	1	-27.4667	153.017					QLD	Brisbane	1954-03-27			Australia							https://doi.org/10.3897/zookeys.908.47375	VM
preservedSpecimen		35880					bombiformis	Amegilla bombiformis (Smith, 1854)		female	1	-27.4667	153.017					QLD	Brisbane	1954-03-27			Australia							https://doi.org/10.3897/zookeys.908.47375	VM
preservedSpecimen		35881					bombiformis	Amegilla bombiformis (Smith, 1854)		female	1	-27.4667	153.017					QLD	Brisbane	1954-03-27			Australia							https://doi.org/10.3897/zookeys.908.47375	VM
preservedSpecimen		35882					bombiformis	Amegilla bombiformis (Smith, 1854)		female	1	-27.4667	153.017					QLD	Brisbane	1954-03-27			Australia							https://doi.org/10.3897/zookeys.908.47375	VM
preservedSpecimen		35883					bombiformis	Amegilla bombiformis (Smith, 1854)		male	1	-27.4667	153.017					QLD	Brisbane	1954-03-06			Australia							https://doi.org/10.3897/zookeys.908.47375	VM
preservedSpecimen		35884					bombiformis	Amegilla bombiformis (Smith, 1854)		male	1	-27.4667	153.017					QLD	Brisbane	1954-03-21			Australia							https://doi.org/10.3897/zookeys.908.47375	VM
preservedSpecimen		35885					bombiformis	Amegilla bombiformis (Smith, 1854)		male	1	-27.4667	153.017					QLD	Brisbane	1954-03-21			Australia							https://doi.org/10.3897/zookeys.908.47375	VM
preservedSpecimen		35886					bombiformis	Amegilla bombiformis (Smith, 1854)		male	1	-27.4667	153.017					QLD	Brisbane	1954-03-13			Australia							https://doi.org/10.3897/zookeys.908.47375	VM
preservedSpecimen		35887					bombiformis	Amegilla bombiformis (Smith, 1854)		female	1	-27.4667	153.017					QLD	Brisbane	1954-03-13			Australia							https://doi.org/10.3897/zookeys.908.47375	VM
preservedSpecimen		35888					bombiformis	Amegilla bombiformis (Smith, 1854)		female	1	-27.4667	153.017					QLD	Brisbane	1955-04-30			Australia							https://doi.org/10.3897/zookeys.908.47375	VM
preservedSpecimen		35889					bombiformis	Amegilla bombiformis (Smith, 1854)		female	1	-27.4667	153.017					QLD	Brisbane	1955-04-30			Australia							https://doi.org/10.3897/zookeys.908.47375	VM
preservedSpecimen		35890					bombiformis	Amegilla bombiformis (Smith, 1854)		male	1	-27.4667	153.017					QLD	Brisbane	1954-03-09			Australia							https://doi.org/10.3897/zookeys.908.47375	VM
preservedSpecimen		35891					bombiformis	Amegilla bombiformis (Smith, 1854)		female	1	-27.4667	153.017					QLD	Brisbane	1954-04-03			Australia							https://doi.org/10.3897/zookeys.908.47375	VM
preservedSpecimen		35892					bombiformis	Amegilla bombiformis (Smith, 1854)		female	1	-27.4667	153.017					QLD	Brisbane	1954-04-03			Australia							https://doi.org/10.3897/zookeys.908.47375	VM
preservedSpecimen		35893					bombiformis	Amegilla bombiformis (Smith, 1854)		male	1	-27.4667	153.017					QLD	Brisbane	1954-04-03			Australia							https://doi.org/10.3897/zookeys.908.47375	VM
[truncated: 9,775 more rows]
