# Supplementary material for: How many bee species are there? A quantitative global estimate
Source: Research Square preprint supplement (doi:10.21203/rs.3.rs-6372769/v1), 2025-06-19
Supplement: Supplementary file 3 [file zookeys-591-001-s002.xls]

## Sheet: Supplementary File S2 - Materia
Genus	Species	Designation	Code	Sex	Region	Locality	Lat.	Long.	Elev. (m.a.s.l.)	Day (start)	Month (start)	Year (start)	Day (end)	Month (end)	Year	Collector(s)	Host Plant	Collecting Method	Barcode Number	Database Number / Sorting Code	Collection	Notes
C.(H.)	charizard	HOLOTYPE	C.chzd.001	M	III	Emb. Sta Juana, C-479 km 21.5	-28.6747	-70.6432	645	15	x				2013	S. Monckton			CCDB-19989 A10	PCYU 0021672	PCYU
C.(H.)	charizard	ALLOTYPE	C.chzd.002	F	III	Chuingo	-28.8251	-70.356	963	15	ix				2010	L. Packer			B09857-D12 Bees of Chile332		PCYU
C.(H.)	charizard	PARATYPE	C.chzd.003	M	IV	Incahuasi	-29.2281	-71.0139	779	10	x				1981	H. Toro					PUCV	dissected abdomen
C.(H.)	charizard	PARATYPE	C.chzd.004	M	IV	Incahuasi	-29.2281	-71.0139	779	10	x				1981	H. Toro					PUCV
C.(H.)	charizard	PARATYPE	C.chzd.005	M	III	C-453 km 22	-28.1816	-69.826	1625	30	ix				2013	S. Monckton			CCDB-19989 A11	PCYU 0021673	PCYU
C.(H.)	charizard	PARATYPE	C.chzd.006	M	IV	E of Vicuña, km 114	-29.9123	-70.3013	1429		ix				2010	L. Packer		white pan			PCYU
C.(H.)	charizard	PARATYPE	C.chzd.007	M	IV	E of Vicuña , 127.8 km	-29.9777	-70.2293	1711	12	ix		19		2010	L. Packer					PCYU
C.(H.)	charizard	PARATYPE	C.chzd.008	F	III	Emb. Sta Juana, C-479 km 21.5	-28.6747	-70.6432	645	15	x				2013	S. Monckton				PCYU 0020910	PCYU
C.(H.)	charizard	PARATYPE	C.chzd.009	F	III	Chuingo	-28.8251	-70.356	963	15	ix				2010	L. Packer			B09857-E05 Bees of Chile337		PCYU
C.(H.)	charizard	PARATYPE	C.chzd.010	F	III	Fundo La Semilla, 125 km SE Copiapó	-28.2507	-69.741	2358	17	x				2004	F.D. Parker & M.E. Irwin		pan trap	CHL-14509-57	FDP52565	BBSL
C.(H.)	charizard	PARATYPE	C.chzd.011	F	III	Alto del Carmen	-28.7594	-70.4867	2272	2	x				1982	F. Rodriguez					BBSL
C.(H.)	charizard	PARATYPE	C.chzd.012	F	IV	Incahuasi	-29.2281	-71.0139	779	10	x				1981	H. Donoso					PUCV
C.(H.)	charizard	PARATYPE	C.chzd.013	F	IV	Incahuasi	-29.2281	-71.0139	779	1	x				1982	O. Martinez					PUCV
C.(H.)	charizard	PARATYPE	C.chzd.014	F	IV	Incahuasi	-29.2281	-71.0139	779	10	x				1981	B. Dyer					PUCV
C.(H.)	charizard	PARATYPE	C.chzd.015	F	IV	Incahuasi	-29.2281	-71.0139	779	10	x				1981	H. Burgos					PUCV
C.(H.)	charizard	PARATYPE	C.chzd.016	F	IV	Puente Las Terneras	-29.9089	-70.2522	1644	4	x				2010	L. Packer				PCYU 0021698	PCYU
C.(H.)	charizard	PARATYPE	C.chzd.017	F	IV	Elqui Prov. 6 km S of Vicuña	-30.0852	-70.7246	889	16	xi				1991	J.G. Rozen	Pleurophora pungens				AMNH
C.(H.)	curvapeligrosa	HOLOTYPE	C.cplg.001	M	RM	Farellones [Camino a Valle Nevado]	-33.37	-70.2786	2393	31	xii				2008	L. Packer	Phacelia			PCYU CHI09-2-3-005	PCYU
C.(H.)	curvapeligrosa	ALLOTYPE	C.cplg.002	F	RM	Farellones [Curva 31]	-33.3563	-70.3248	2179	31	xii				2008	L. Packer	Echium vulgare			PCYU CHI09-2-2-015	PCYU
C.(H.)	curvapeligrosa	PARATYPE	C.cplg.003	M	RM	Farellones [Camino a Valle Nevado]	-33.37	-70.2786	2393	31	xii				2008	L. Packer	Phacelia			PCYU CHI09-2-3-008	PCYU
C.(H.)	curvapeligrosa	PARATYPE	C.cplg.004	M	RM	Farellones [Camino a Valle Nevado]	-33.37	-70.2786	2393	31	xii				2008	L. Packer	Phacelia			PCYU CHI09-2-3-003	PCYU
C.(H.)	curvapeligrosa	PARATYPE	C.cplg.005	M	RM	Farellones [Camino a Valle Nevado]	-33.37	-70.2786	2393	31	xii				2008	L. Packer	Phacelia			PCYU CHI09-2-3-006	PCYU	cleared specimen
C.(H.)	curvapeligrosa	PARATYPE	C.cplg.006	M	RM	Farellones [Curva 31]	-33.3563	-70.3248	2179	31	xii				2008	L. Packer	Echium vulgare				PCYU	cleared specimen
C.(H.)	curvapeligrosa	PARATYPE	C.cplg.007	M	RM	Farellones	-33.3535	-70.3168	2385	1	i				1973	A. Moldenke					AMNH
C.(H.)	curvapeligrosa	PARATYPE	C.cplg.008	M	RM	Farellones	-33.3535	-70.3168	2385	9	i				2009	L. Packer				PCYU CHI09-12-3-004	PCYU
C.(H.)	curvapeligrosa	PARATYPE	C.cplg.009	M	RM	Farellones	-33.3535	-70.3168	2385	9	i				2009	L. Packer				PCYU CHI09-12-3-003	PCYU
C.(H.)	curvapeligrosa	PARATYPE	C.cplg.010	M	RM	Farellones	-33.3535	-70.3168	2385	1	i				1973	A. Moldenke					AMNH	dissected mouthparts & hindleg
C.(H.)	curvapeligrosa	PARATYPE	C.cplg.011	M	RM	Farellones [Curva 33]	-33.3543	-70.3195	2295	30	xii				2012	L. Packer & R. Smith					PCYU
C.(H.)	curvapeligrosa	PARATYPE	C.cplg.012	M	RM	Valle Nevado	-33.3622	-70.2576	2677	31	xii				2008	L. Packer	Phacelia				PCYU
C.(H.)	curvapeligrosa	PARATYPE	C.cplg.013	M	RM	Valle Nevado	-33.3622	-70.2576	2677	31	xii				2008	L. Packer	Phacelia				PCYU
C.(H.)	curvapeligrosa	PARATYPE	C.cplg.014	M	RM	Valle Nevado	-33.3622	-70.2576	2677	31	xii				2008	L. Packer	Phacelia				PCYU
C.(H.)	curvapeligrosa	PARATYPE	C.cplg.015	M	RM	Valle Nevado	-33.3622	-70.2576	2677	31	xii				2008	L. Packer	Phacelia			PCYU CHI09-2-5-011	PCYU
C.(H.)	curvapeligrosa	PARATYPE	C.cplg.016	M	RM	Valle Nevado [Farellones/El Colorado]	-33.3411	-70.295	2596	9	i				2009	L. Packer				PCYU CHI09-10-2-008	PCYU
C.(H.)	curvapeligrosa	PARATYPE	C.cplg.017	M	RM	Valle Nevado [Farellones/El Colorado]	-33.3411	-70.295	2596	9	i				2009	L. Packer				PCYU CHI09-10-2-009	PCYU
C.(H.)	curvapeligrosa	PARATYPE	C.cplg.018	M	RM	Valle Nevado [Termas de Colina]	-33.856	-69.9804	3000	8	i				2009	L. Packer			CCDB-03755 G03	PCYU CHI09-10-2-004	PCYU
C.(H.)	curvapeligrosa	PARATYPE	C.cplg.019	M	RM	Farellones, Valle Nevado	-33.3539	-70.2489	3026	9	xii				2006	L. Packer					PCYU
C.(H.)	curvapeligrosa	PARATYPE	C.cplg.020	M	RM	Farellones, Valle Nevado	-33.3539	-70.2489	3026	9	xii				2006	L. Packer					PCYU
C.(H.)	curvapeligrosa	PARATYPE	C.cplg.021	M	RM	Farellones, Valle Nevado	-33.3539	-70.2489	3026	9	xii				2006	L. Packer					PCYU
C.(H.)	curvapeligrosa	PARATYPE	C.cplg.022	M	RM	Farellones, Valle Nevado	-33.3539	-70.2489	3026	9	xii				2006	L. Packer					PCYU
C.(H.)	curvapeligrosa	PARATYPE	C.cplg.023	M	RM	Farellones, Valle Nevado	-33.3539	-70.2489	3026	9	xii				2006	L. Packer					PCYU
C.(H.)	curvapeligrosa	PARATYPE	C.cplg.024	M	RM	Río Yeso, Hwy G-455 km 18.1	-33.6942	-70.112	2337	27	ii		22	iii	2013	S. Monckton & J. Postlethwaite		pan trap			PCYU
C.(H.)	curvapeligrosa	PARATYPE	C.cplg.025	M	RM	Río Yeso, Hwy G-455 km 18.1	-33.6942	-70.112	2337	27	ii		22	iii	2013	S. Monckton & J. Postlethwaite		pan trap			PCYU
C.(H.)	curvapeligrosa	PARATYPE	C.cplg.026	M	RM	Río Yeso, Hwy G-455 km 18.1	-33.6942	-70.112	2337	1	i		8		2013	L. Packer & R. Smith					PCYU
C.(H.)	curvapeligrosa		C.cplg.027	M	VII	Río Teno, Paso Vergara control post	-35.1381	-70.4783	1789	28	ii		21	iii	2013	S. Monckton & J. Postlethwaite		pan trap			PCYU
C.(H.)	curvapeligrosa		C.cplg.028	M	RM	Cerro Roble, nr. Til-til	-32.9763	-71.0142	2200	18	xi				2001	L. Packer			CCDB-03755 F09		PCYU	cleared terminalia
C.(H.)	curvapeligrosa		C.cplg.029	M	RM	Cerro Roble, nr. Til-til	-32.9763	-71.0142	2200	17	xi				2001	L. Packer					PCYU
C.(H.)	curvapeligrosa		C.cplg.030	M	RM	Cerro Roble, nr. Til-til	-32.9763	-71.0142	2200	18	xi				2001	L. Packer					PCYU
C.(H.)	curvapeligrosa		C.cplg.031	M	RM	Espinalillo	-33.005	-70.9406	877	5	x				2013	L. Packer					PCYU
C.(H.)	curvapeligrosa	PARATYPE	C.cplg.032	M	VI	T. del Flaco	-34.9612	-70.4324	1734		ii				1967	M. Guzman					PUCV
C.(H.)	curvapeligrosa	PARATYPE	C.cplg.034	F	RM	Farellones [Camino a Valle Nevado]	-33.37	-70.2786	2393	31	xii				2008	L. Packer	Phacelia			PCYU CHI09-2-3-001	PCYU
C.(H.)	curvapeligrosa	PARATYPE	C.cplg.035	F	RM	Farellones [Camino a Valle Nevado]	-33.37	-70.2786	2393	31	xii				2008	L. Packer	Phacelia			PCYU CHI09-2-3-002	PCYU
C.(H.)	curvapeligrosa	PARATYPE	C.cplg.036	F	RM	Farellones [Camino a Valle Nevado]	-33.37	-70.2786	2393	31	xii				2008	L. Packer	Phacelia		B09997-B10 Bees of Chile591	PCYU CHI09-2-3-004	PCYU
C.(H.)	curvapeligrosa	PARATYPE	C.cplg.037	F	RM	Farellones [Curva 31]	-33.3563	-70.3248	2179	31	xii				2008	L. Packer	Echium vulgare			PCYU CHI09-2-2-017	PCYU
C.(H.)	curvapeligrosa	PARATYPE	C.cplg.038	F	RM	Valle Nevado	-33.3622	-70.2576	2677	31	xii				2008	L. Packer	Phacelia				PCYU
C.(H.)	curvapeligrosa	PARATYPE	C.cplg.039	F	RM	Valle Nevado	-33.3622	-70.2576	2677	31	xii				2008	L. Packer	Phacelia				PCYU
C.(H.)	curvapeligrosa	PARATYPE	C.cplg.040	F	RM	Valle Nevado	-33.3622	-70.2576	2677	31	xii				2008	L. Packer	Phacelia				PCYU
C.(H.)	curvapeligrosa	PARATYPE	C.cplg.041	F	RM	Valle Nevado [Farellones/El Colorado]	-33.3411	-70.295	2596	9	i				2009	L. Packer				PCYU CHI09-10-2-011	PCYU
C.(H.)	curvapeligrosa	PARATYPE	C.cplg.042	F	RM	Valle Nevado [Farellones/El Colorado]	-33.3411	-70.295	2596	9	i				2009	L. Packer				PCYU CHI09-10-2-010	PCYU
C.(H.)	curvapeligrosa	PARATYPE	C.cplg.043	F	RM	Valle Nevado [Termas de Colina]	-33.856	-69.9804	3000	8	i				2009	L. Packer			CCDB-03755 H02	PCYU CHI09-10-2-003	PCYU
C.(H.)	curvapeligrosa	PARATYPE	C.cplg.044	F	RM	Farellones [?????]	-33.2208	-70.1633	2464	31	xii				2008	L. Packer					PCYU
C.(H.)	curvapeligrosa	PARATYPE	C.cplg.045	F	RM	Valle Nevado	-33.856	-69.9804	3000	8	i				2009	L. Packer				PCYU CHI09-10-2-002	PCYU
C.(H.)	curvapeligrosa	PARATYPE	C.cplg.046	F	RM	Farellones, Valle Nevado	-33.3539	-70.2489	3026	9	xii				2006	L. Packer					PCYU
C.(H.)	curvapeligrosa	PARATYPE	C.cplg.047	F	RM	Farellones, Valle Nevado	-33.3539	-70.2489	3026	1	i				1973	A. Moldenke					AMNH	dissected mouthparts
C.(H.)	curvapeligrosa	PARATYPE	C.cplg.048	F	RM	Río Yeso, Hwy G-455 km 18.1	-33.6942	-70.112	2337	27	ii		22	iii	2013	S. Monckton & J. Postlethwaite		pan trap			PCYU
C.(H.)	curvapeligrosa	PARATYPE	C.cplg.049	F	RM	Río Yeso, Hwy G-455 km 18.1	-33.6942	-70.112	2337	1	i		8		2013	L. Packer & R. Smith					PCYU
C.(H.)	curvapeligrosa	PARATYPE	C.cplg.050	F	RM	Valle El Yeso, Hwy G-457, km 16	-33.6247	-69.9583	2705	26	ii		23	iii	2013	S. Monckton & J. Postlethwaite		pan trap			PCYU
C.(H.)	curvapeligrosa	PARATYPE	C.cplg.051	F	RM	Valle El Yeso, Hwy G-457, km 16	-33.6247	-69.9583	2705	7	i		26	ii	2013	S. Monckton & J. Postlethwaite		pan trap			PCYU
C.(H.)	curvapeligrosa	PARATYPE	C.cplg.052	F	RM	Valle El Yeso, Hwy G-457, km 17	-33.6247	-69.9539	2705	7	i		26	ii	2013	S. Monckton & J. Postlewaite		pan trap			PCYU
C.(H.)	curvapeligrosa	PARATYPE	C.cplg.053	F	RM	Valle El Yeso, Hwy G-457, km 17	-33.6247	-69.9539	2705	7	i		26	ii	2013	S. Monckton & J. Postlewaite		pan trap			PCYU
C.(H.)	curvapeligrosa	PARATYPE	C.cplg.054	F	RM	Termas del Plomo	-33.6208	-69.9196	2938	31	xii	2012	7	i	2013	L. Packer & R. Smith		pan trap	CCDB-19991 C04		PCYU
C.(H.)	curvapeligrosa	PARATYPE	C.cplg.055	F	RM	Termas del Plomo	-33.6208	-69.9196	2938	21	iv				2013	S. Monckton & J. Postlethwaite					PCYU
C.(H.)	curvapeligrosa	PARATYPE	C.cplg.056	F	RM	W of Termas del Plomo, main site	-33.6208	-69.9196	2938	31	xii				2012	L. Packer & R. Smith		pan trap			PCYU
C.(H.)	curvapeligrosa	PARATYPE	C.cplg.057	F	RM	W of Termas del Plomo, main site	-33.6208	-69.9196	2938	31	xii				2012	L. Packer & R. Smith		pan trap			PCYU
C.(H.)	curvapeligrosa	PARATYPE	C.cplg.058	F	RM	Termas del Plomo	-33.6208	-69.9196	2938	21	iv				2013	S. Monckton & J. Postlethwaite					PCYU
C.(H.)	curvapeligrosa	PARATYPE	C.cplg.059	F	RM	W of Termas del Plomo, main site	-33.6208	-69.9196	2938	31	xii				2012	L. Packer & R. Smith		pan trap			PCYU
C.(H.)	curvapeligrosa	PARATYPE	C.cplg.060	F	RM	W of Termas del Plomo, main site	-33.6208	-69.9196	2938	31	xii				2012	L. Packer & R. Smith		pan trap			PCYU
C.(H.)	curvapeligrosa	PARATYPE	C.cplg.061	F	RM	W of Termas del Plomo, main site	-33.6208	-69.9196	2938	31	xii				2012	L. Packer & R. Smith		pan trap			PCYU
C.(H.)	curvapeligrosa	PARATYPE	C.cplg.062	F	RM	W of Termas del Plomo, main site	-33.6208	-69.9196	2938	31	xii				2012	L. Packer & R. Smith		pan trap			PCYU
C.(H.)	curvapeligrosa	PARATYPE	C.cplg.063	F	RM	W of Termas del Plomo, main site	-33.6208	-69.9196	2938	31	xii				2012	L. Packer & R. Smith		pan trap			PCYU
C.(H.)	curvapeligrosa	PARATYPE	C.cplg.064	F	RM	W of Termas del Plomo, main site	-33.6208	-69.9196	2938	31	xii				2012	L. Packer & R. Smith		pan trap			PCYU
C.(H.)	curvapeligrosa	PARATYPE	C.cplg.065	F	RM	W of Termas del Plomo, main site	-33.6208	-69.9196	2938	31	xii				2012	L. Packer & R. Smith		pan trap			PCYU
C.(H.)	curvapeligrosa	PARATYPE	C.cplg.066	F	RM	W of Termas del Plomo, main site	-33.6208	-69.9196	2938	31	xii				2012	L. Packer & R. Smith		pan trap			BBSL
C.(H.)	curvapeligrosa	PARATYPE	C.cplg.067	F	RM	W of Termas del Plomo, main site	-33.6208	-69.9196	2938	31	xii				2012	L. Packer & R. Smith		pan trap			BBSL
C.(H.)	curvapeligrosa	PARATYPE	C.cplg.068	F	RM	W of Termas del Plomo, main site	-33.6208	-69.9196	2938	31	xii				2012	L. Packer & R. Smith		pan trap			CTMI
C.(H.)	curvapeligrosa	PARATYPE	C.cplg.069	F	RM	W of Termas del Plomo, main site	-33.6208	-69.9196	2938	31	xii				2012	L. Packer & R. Smith		pan trap			CTMI
C.(H.)	curvapeligrosa	PARATYPE	C.cplg.070	F	RM	W of Termas del Plomo	-33.6208	-69.9196	2938	26	ii		21	iv	2013	S. Monckton & J. Postlewaite		pan trap			PCYU
C.(H.)	curvapeligrosa	PARATYPE	C.cplg.071	F	RM	W of Termas del Plomo	-33.6208	-69.9196	2938	26	ii		21	iv	2013	S. Monckton & J. Postlewaite		pan trap			PCYU
C.(H.)	curvapeligrosa	PARATYPE	C.cplg.072	F	RM	E of El Volcan	-33.8181	-70.021	2228	15	ii		22	iii	2013	S. Monckton & J. Postlethwaite		pan trap			PCYU
C.(H.)	curvapeligrosa	PARATYPE	C.cplg.073	F	RM	E of El Volcan	-33.8181	-70.021	2228	15	ii		22	iii	2013	S. Monckton & J. Postlethwaite		pan trap			PCYU
C.(H.)	curvapeligrosa		C.cplg.074	F	RM	Cerro Roble, nr. Til-til	-32.9763	-71.0142	2200	19	xi				2001	L. Packer					PCYU
C.(H.)	curvapeligrosa		C.cplg.075	F	RM	Cerro El Roble	-32.9763	-71.0142	2200	20	i				2004						PCYU
C.(H.)	curvapeligrosa		C.cplg.076	F	VII	Río Teno, Paso Vergara control post	-35.1381	-70.4783	1789	28	ii		21	iii	2013	S. Monckton & J. Postlethwaite		pan trap			PCYU
C.(H.)	curvapeligrosa	PARATYPE	C.cplg.077	F	VI	Colchagua, Vegas del Flaco	-34.9612	-70.4324	1735	28	vi		30		1957	L. Peña					AMNH
C.(H.)	curvapeligrosa	PARATYPE	C.cplg.078	F	VI	Colchagua, Vegas del Flaco	-34.9612	-70.4324	1735	28	vi		30		1957	Luis E. Peña					AMNH
C.(H.)	curvapeligrosa	PARATYPE	C.cplg.079	F	VI	Termas del Flaco	-34.9612	-70.4324	1734	7	ii				1967	H. Toro					PUCV
C.(H.)	curvapeligrosa	PARATYPE	C.cplg.080	F	VI	Termas del Flaco	-34.9612	-70.4324	1734	7	ii				1967	H. Toro					PUCV
C.(H.)	curvapeligrosa	PARATYPE	C.cplg.081	F	VI	Termas del Flaco	-34.9612	-70.4324	1734	7	ii				1967	H. Toro					PUCV
C.(H.)	curvapeligrosa	PARATYPE	C.cplg.082	F	VI	Termas del Flaco	-34.9612	-70.4324	1735	7	ii				1967	H. Toro					AMNH
C.(H.)	curvapeligrosa	PARATYPE	C.cplg.083	F	VI	Termas del Flaco	-34.9612	-70.4324	1735	7	ii				1967	H. Toro					AMNH
C.(H.)	deserticola	HOLOTYPE	-	M	IV	Pueblo Hundido	-30.0629	-70.4911	1031		x				1972	L. Ruz	Heliotropium stenophyllum				PUCV
C.(H.)	deserticola	PARATYPE	C.dsrt.001	M	IV	Pueblo Hundido	-30.0629	-70.4911	1031		x				1972	L. Ruz	Heliotropium stenophyllum				PUCV
C.(H.)	deserticola		C.dsrt.002	F	IV	Dunes, Los Choros	-29.313	-71.2937	145	13	ix				2010	L. Packer			B09857-B01		PCYU
C.(H.)	deserticola		C.dsrt.003	M	IV	Dunes, Los Choros	-29.313	-71.2937	145	13	ix				2010	L. Packer			B09857-A09 Bees of Chile293		PCYU
C.(H.)	deserticola		C.dsrt.004	M	IV	Bahía Tongoy, S of Tongoy	-30.272	-71.483	25	8	x				2001	Packer & Fraser					PCYU
C.(H.)	deserticola		C.dsrt.005	M	IV	La Serena	-29.9063	-71.2502	20	28	xii				1988	L. Ruz E.					PUCV
C.(H.)	deserticola		C.dsrt.006	M	IV	Bahía Tongoy, S of Tongoy	-30.272	-71.483	25	8	x				2001	Packer & Fraser					PCYU	dissected terminalia & hindleg
C.(H.)	deserticola		C.dsrt.007	M	IV	Puerto Aldea nr. Tongoy	-30.301	-71.6063	9	26	x				2001	Packer & Fraser					PCYU	dissected terminalia
C.(H.)	deserticola		C.dsrt.008	M	III	E of Carrizalillo, C-500, km 53.3	-28.9982	-71.3787	208	8	xi		13	xii	2013	S. Monckton & J. Postlethwaite					PCYU
C.(H.)	deserticola		C.dsrt.009	M	IV	Puerto Aldea nr. Tongoy	-30.301	-71.6063	9	26	x				2001	Packer & Fraser					PCYU
C.(H.)	deserticola		C.dsrt.010	M	IV	Bahía Tongoy, S of Tongoy	-30.272	-71.483	25	8	x				2001	Packer & Fraser			CCDB-22789 D05		PCYU
C.(H.)	deserticola		C.dsrt.011	M	IV	Puerto Aldea nr. Tongoy	-30.301	-71.6063	9	26	x				2001	Packer & Fraser					PCYU
C.(H.)	deserticola		C.dsrt.012	M	IV	Puerto Aldea nr. Tongoy	-30.301	-71.6063	9	26	x				2001	Packer & Fraser					PCYU
C.(H.)	deserticola		C.dsrt.013	M	IV	W of Barrancas	-30.2149	-71.3292	337	10	x				2000	L. Packer					PCYU
C.(H.)	deserticola		C.dsrt.014	M	IV	P.N. Fray Jorge Entrance	-30.6266	-71.6633	282	7	x				2001	L. Packer					PCYU
C.(H.)	deserticola		C.dsrt.015	M	IV	Los Vilos, Caleta Los Lobos	-31.9492	-71.5258	11	26	x				2001	Packer & Fraser					PCYU
C.(H.)	deserticola		C.dsrt.016	M	IV	Bahía Tongoy, S of Tongoy	-30.272	-71.483	25	8	x				2001	Packer & Fraser					PCYU
C.(H.)	deserticola		C.dsrt.017	M	IV	Guanaqueros	-30.198	-71.4221	22	7	x				1982	H. Toro					PUCV
C.(H.)	deserticola		C.dsrt.018	M	IV	Pr. Coquimbo, Carretera Pan-Am al norte de La Serena						1970			1972	A.R. Moldenke	Calandrinia grandiflora			INT. BIOL. PROGRAM # ???	AMNH
C.(H.)	deserticola		C.dsrt.019	M	IV	Pr. Coquimbo, Carretera Pan-Am al norte de La Serena				21	xi				1970	A.R. Moldenke				INT. BIOL. PROGRAM #47128	AMNH
C.(H.)	deserticola		C.dsrt.020	M	IV	Coquimbo Prov. 4km.SSocos	-30.7445	-71.5284	201	22	ix				1966	M.E. Irwin					BBSL
C.(H.)	deserticola		C.dsrt.021	M	IV	Q. Los Choros	-29.343	-71.1553	232	11	x				1977	V. Cabezas					AMNH
C.(H.)	deserticola		C.dsrt.022	M	IV	Choros Bajos	-29.2908	-71.3089	57	12	x				1977	H. Flores				PUCV-ENTO 19926	PUCV
C.(H.)	deserticola		C.dsrt.023	M	IV	Prov. Coquimbo, Río Los Chorros	-29.343	-71.1553	232	6	xi				1956	Wagenknecht					PUCV
C.(H.)	deserticola		C.dsrt.024	M	III	Huasco prov., Carrizalillo	-29.0991	-71.3912	179	20	ix				2003	A. Ugarte			B10037-H8 Bees of Chile756		PCYU
C.(H.)	deserticola		C.dsrt.025	M	III	SE of Los Choros, between WP & the dunes	-29.3052	-71.2836	280	13	ix				2010	L. Packer					PCYU
C.(H.)	deserticola		C.dsrt.026	M	III	SE of Los Choros, between WP & the dunes	-29.3052	-71.2836	280	13	ix				2010	L. Packer					PCYU
C.(H.)	deserticola		C.dsrt.027	M	III	SE of Los Choros, between WP & the dunes	-29.3052	-71.2836	280	13	ix				2010	L. Packer					PCYU
C.(H.)	deserticola		C.dsrt.028	M	III	SE of Los Choros, between WP & the dunes	-29.3052	-71.2836	280	13	ix				2010	L. Packer					PCYU
C.(H.)	deserticola		C.dsrt.029	M	III	SE of Los Choros, between WP & the dunes	-29.3052	-71.2836	280	13	ix				2010	L. Packer					PCYU
C.(H.)	deserticola		C.dsrt.030	M	III	SE of Los Choros, between WP & the dunes	-29.3052	-71.2836	280	13	ix				2010	L. Packer					PCYU
C.(H.)	deserticola		C.dsrt.031	M	III	SE of Los Choros, between WP & the dunes	-29.3052	-71.2836	280	13	ix				2010	L. Packer					PCYU
C.(H.)	deserticola		C.dsrt.032	M	IV	Qda Los Litres SW of Tongoy, inland rd.	-30.3231	-71.5262	16	26	x				2001	Packer & Fraser					PCYU
C.(H.)	deserticola		C.dsrt.033	F	III	Caleta Carrizalillo	-29.1098	-71.4613	11	8	xi				2013	S. Monckton		pan trap	CCDB-19989 C05	PCYU 0021691	PCYU
C.(H.)	deserticola		C.dsrt.034	F	III	Huasco prov., Chañar de Aceituno	-28.9534	-71.3472	271	18	ix				2003	A. Ugarte			B10037-H11 Bees of Chile759		PCYU
C.(H.)	deserticola		C.dsrt.035	F	IV	Pueblo Hundido	-30.0629	-70.4911	1031		x				1972	V. Cabezas	Heliotropium stenophyllum				AMNH
C.(H.)	deserticola		C.dsrt.036	F	III	Caleta Carrizalillo	-29.1098	-71.4613	11	13	x		8	xi	2013	J. Postlethwaite & S. Monckton					PCYU
C.(H.)	deserticola		C.dsrt.037	F	IV	Q. Los Choros	-29.343	-71.1553	232	12	x				1977	V. Cabezas					AMNH
C.(H.)	deserticola		C.dsrt.038	F	IV	Choros Bajos	-29.2908	-71.3089	57	12	x				1977	H. Flores				PUCV-ENTO 19930	PUCV
C.(H.)	deserticola		C.dsrt.039	F	IV	Choros Bajos	-29.2908	-71.3089	57	12	x				1977	H. Flores					AMNH
C.(H.)	deserticola		C.dsrt.040	F	IV	Choros Bajos	-29.2908	-71.3089	57	12	x				1977	H. Flores					AMNH
C.(H.)	deserticola		C.dsrt.041	F	IV	Choros Bajos	-29.2908	-71.3089	57	12	x				1977	H. Flores					AMNH
C.(H.)	deserticola		C.dsrt.042	F	IV	Choros Bajos	-29.2908	-71.3089	57	12	x				1977	H. Flores					AMNH
C.(H.)	deserticola		C.dsrt.043	F	III	Caleta Chañaral de Aceituna	-29.09	-71.467	8	18	ix				2003	L. Packer					PCYU
C.(H.)	deserticola		C.dsrt.044	F	III	Caleta Apolillado	-29.1826	-71.4882	18	8	xi		13	xii	2013	S. Monckton & J. Postlethwaite					PCYU
C.(H.)	deserticola		C.dsrt.045	M	III	Los Choros	-29.2908	-71.3089	57	25	x				2002	J. Grixti & A. Zayed		yellow pan			PCYU
C.(H.)	deserticola		C.dsrt.046	F	III	E of Carrizalillo, C-500, km 53.3	-28.9982	-71.3787	208	8	xi		13	xii	2013	S. Monckton & J. Postlethwaite					PCYU
C.(H.)	deserticola		C.dsrt.047	M	III	Caleta Apolillada	-29.1826	-71.4882	18	8	xi				2013	S. Monckton					PCYU
C.(H.)	deserticola		C.dsrt.048	M	III	SE of Los Choros, near dunes	-29.3052	-71.2836	280	13	ix				2010	L. Packer					CTMI
C.(H.)	deserticola		C.dsrt.049	M	III	Caleta Chañaral de Aceituna	-29.0804	-71.4672	10	5	x				2010	L. Packer & G.S. Fraser				PCYU 0004655	PCYU
C.(H.)	deserticola		C.dsrt.050	M	IV	Bahía Tongoy, S of Tongoy	-30.272	-71.483	25	8	x				2001	L. Packer & G.S. Fraser					PCYU
C.(H.)	deserticola		C.dsrt.051	M	IV	Tongoy Avda Costanera	-30.253	-71.494	9	25	x				2001	L. Packer & G.S. Fraser					PCYU
C.(H.)	deserticola		C.dsrt.052	M	III	Los Choros	-29.2908	-71.3089	57	25	x				2002	J. Grixti & A. Zayed		yellow pan			PCYU
C.(H.)	deserticola		C.dsrt.053	M	III	Los Choros	-29.2908	-71.3089	57	25	x				2002	J. Grixti & A. Zayed		yellow pan			PCYU
C.(H.)	deserticola		C.dsrt.054	M	III	Los Choros	-29.2908	-71.3089	57	25	x				2002	J. Grixti & A. Zayed		yellow pan			PCYU
C.(H.)	deserticola		C.dsrt.055	M	IV	Choapa: Los Vilos	-31.9122	-71.5112	54	18	xi				1991	J.G. Rozen, L. Peña, A. Ugarte	Cristaria				AMNH
C.(H.)	deserticola		C.dsrt.056	M	IV	Elqui Prov. 26 km S of Vicuña	-30.1903	-70.6608	1691	5	x				1994	Rozen, Quinter, Ascher					AMNH
C.(H.)	deserticola		C.dsrt.057	M	IV	Tongoy	-30.2521	-71.4998	54	14	xi				2002	J. Grixti & A. Zayed		bright blue pan			PCYU
C.(H.)	deserticola		C.dsrt.058	M	III	Huasco Prov., Carrizalillo	-29.0991	-71.3912	179	20	ix				2003	A. Ugarte					PCYU
C.(H.)	deserticola		C.dsrt.059	M	III	Huasco Prov., Chañar de Aceituno	-28.9534	-71.3472	279	18	ix				2003	A. Ugarte					PCYU
C.(H.)	deserticola		C.dsrt.060	M	III	Huasco Prov., Chañar de Aceituno	-29.0279	-71.4036	279	20	ix				2003	A. Ugarte					PCYU
C.(H.)	deserticola		C.dsrt.061	M	III	Huasco Prov., Chañar de Aceituno	-29.0279	-71.4036	279	20	ix				2003	A. Ugarte					PCYU
C.(H.)	deserticola		C.dsrt.062	M	III	Huasco Prov., Chañar de Aceituno	-29.0279	-71.4036	279	20	ix				2003	A. Ugarte					PCYU
C.(H.)	deserticola		C.dsrt.063	M	III	Huasco Prov., Chañar de Aceituno	-29.0279	-71.4036	279	20	ix				2003	A. Ugarte					PCYU
C.(H.)	deserticola		C.dsrt.064	M	III	Huasco Prov., Chañar de Aceituno	-29.0279	-71.4036	279	20	ix				2003	A. Ugarte					PCYU
C.(H.)	deserticola		C.dsrt.065	M	III	Huasco Prov., Chañar de Aceituno	-29.0279	-71.4036	279	20	ix				2003	A. Ugarte					PCYU
C.(H.)	deserticola		C.dsrt.066	M	III	Huasco Prov., Chañar de Aceituno	-29.0279	-71.4036	279	20	ix				2003	A. Ugarte					PCYU
C.(H.)	deserticola		C.dsrt.067	M	III	Huasco Prov., Chañar de Aceituno	-29.0279	-71.4036	165	20	ix				2003	A. Ugarte					PCYU
C.(H.)	deserticola		C.dsrt.068	M	IV	Limarí Prov. Talinay Parq Nal.	-30.8672	-71.6013	282	10	x				2001	J.G. Rozen & A. Ugarte	Nolana				AMNH
C.(H.)	deserticola		C.dsrt.069	M	IV	Elqui Prov. 8 km N of La Serena	-29.8373	-71.2607	16	7	xi				2000	J.G. Rozen					AMNH
C.(H.)	deserticola		C.dsrt.070	M	IV	Elqui Prov. 17 km S Coquimbo	-30.0878	-71.3617	35	4	x				1994	Rozen, Quinter, Ascher					AMNH
C.(H.)	deserticola		C.dsrt.071	F	V	Aconcagua Prov. Papudo/Zapallar				5	xi				1971	A.R. Moldenke	Chorizanthe vaginata			INT BIOL PROGRAM 45388	AMNH
C.(H.)	deserticola		C.dsrt.072	F	IV	Carretera Pan-Am al norte de La Serena	-29.8052	-71.2872	30	15	x				1971	A.R. Moldenke	Calandrinia			INT BIOL PROGRAM 41979	AMNH
C.(H.)	deserticola		C.dsrt.073	F	III	Caleta Apolillada	-29.1826	-71.4882	18	8	xi				2013	S. Monckton					PCYU
C.(H.)	deserticola		C.dsrt.074	F	III	Caleta Carrizalillo	-29.1098	-71.4613	11	8	xi				2013	S. Monckton					PCYU
C.(H.)	deserticola		C.dsrt.075	F	III	Caleta Apolillada	-29.1826	-71.4882	18	8	xi				2013	S. Monckton					PCYU
C.(H.)	deserticola		C.dsrt.076	F	III	Caleta Carrizalillo	-29.1098	-71.4613	11	8	xi				2013	S. Monckton					PCYU
C.(H.)	deserticola		C.dsrt.077	F	III	Caleta Carrizalillo	-29.1098	-71.4613	11	8	xi				2013	S. Monckton					PCYU
C.(H.)	deserticola		C.dsrt.078	F	III	Caleta Carrizalillo	-29.1098	-71.4613	11	8	xi				2013	S. Monckton					PCYU
C.(H.)	deserticola		C.dsrt.079	F	III	SE of Los Choros, near dunes	-29.3052	-71.2836	280	13	ix				2010	L. Packer					PCYU
C.(H.)	deserticola		C.dsrt.080	F	III	SE of Los Choros, near dunes	-29.3052	-71.2836	280	13	ix				2010	L. Packer					CTMI
C.(H.)	deserticola		C.dsrt.081	F	IV	Bahía Tongoy, S of Tongoy	-30.272	-71.483	25	8	x				2001	L. Packer & G.S. Fraser					PCYU
C.(H.)	deserticola		C.dsrt.082	F	III	Caleta Chañaral de Aceituna	-29.0804	-71.4672	10	5	x				2010	L. Packer & G.S. Fraser					PCYU
C.(H.)	deserticola		C.dsrt.083	F	IV	Puerto Aldea, near Tongoy	-30.301	-71.6063	9	26	x				2001	L. Packer & G.S. Fraser					PCYU
C.(H.)	deserticola		C.dsrt.084	F	IV	Puerto Aldea, near Tongoy	-30.301	-71.6063	9	26	x				2001	L. Packer & G.S. Fraser					PCYU
C.(H.)	deserticola		C.dsrt.085	F	IV	Puerto Aldea, near Tongoy	-30.301	-71.6063	9	26	x				2001	L. Packer & G.S. Fraser					PCYU
C.(H.)	deserticola		C.dsrt.086	F	IV	Quebrada Los Litres, SW of Tongoy, inland rd.	-30.3231	-71.5262	16	26	x				2001	L. Packer & G.S. Fraser					PCYU
C.(H.)	deserticola		C.dsrt.087	F	III	SE of Los Choros, near dunes	-29.3052	-71.2836	280	13	ix				2010	L. Packer					PCYU
C.(H.)	deserticola		C.dsrt.088	F	III	Caleta Chañaral de Aceituna	-29.0804	-71.4672	10	5	x				2010	L. Packer & G.S. Fraser				PCYU 0004646	PCYU
C.(H.)	deserticola		C.dsrt.089	F	III	Los Choros	-29.2908	-71.3089	57	25	x				2002	J. Grixti & A. Zayed		yellow pan			PCYU
C.(H.)	deserticola		C.dsrt.090	F	III	Los Choros	-29.2908	-71.3089	57	25	x				2002	J. Grixti & A. Zayed		yellow pan			PCYU
C.(H.)	deserticola		C.dsrt.091	F	IV	Tongoy	-30.2521	-71.4998	54	14	xi				2002	J. Grixti & A. Zayed		white pan			PCYU
C.(H.)	deserticola		C.dsrt.092	F	IV	Los Choros	-29.2908	-71.3089	57	25	x				2002	J. Grixti & A. Zayed		white pan			PCYU
C.(H.)	deserticola		C.dsrt.093	F	IV	Tongoy	-30.2521	-71.4998	54	5	x				2002	J. Grixti & A. Zayed					PCYU
C.(H.)	deserticola		C.dsrt.094	F	III	Caleta Carrizalillo	-29.1098	-71.4613	11	8	xi				2013	S. Monckton					PCYU
C.(H.)	deserticola		C.dsrt.095	F	IV	Guanaqueros	-30.198	-71.4221	22	7	x				1982	E. Chiappa					PUCV
C.(H.)	deserticola		C.dsrt.096	F	IV	Los Vilos	-31.9311	-71.5133	12	13	xii				2006	L. Packer					PCYU
C.(H.)	deserticola		C.dsrt.097	F	III	Caleta Chañaral de Aceituna	-29.0904	-71.4672	10	5	x				2010	L. Packer & G.S. Fraser				PCYU 0004643	PCYU
C.(H.)	deserticola		C.dsrt.098	F	III	Caleta Chañaral de Aceituna	-29.0904	-71.4672	10	5	x				2010	L. Packer & G.S. Fraser				PCYU 0004649	PCYU
C.(H.)	deserticola		C.dsrt.099	F	III	Caleta Chañaral de Aceituna	-29.0904	-71.4672	10	5	x				2010	L. Packer & G.S. Fraser				PCYU 0004664	PCYU
C.(H.)	deserticola		C.dsrt.100	F	III	Caleta Chañaral de Aceituna	-29.0904	-71.4672	10	5	x				2010	L. Packer & G.S. Fraser				PCYU 0004663	PCYU
C.(H.)	deserticola		C.dsrt.101	F	III	Caleta Chañaral de Aceituna	-29.0904	-71.4672	10	5	x				2010	L. Packer & G.S. Fraser				PCYU 0004661	PCYU
C.(H.)	deserticola		C.dsrt.102	F	III	Caleta Chañaral de Aceituna	-29.0904	-71.4672	10	5	x				2010	L. Packer & G.S. Fraser				PCYU 0004660	PCYU
C.(H.)	deserticola		C.dsrt.103	F	III	Caleta Chañaral de Aceituna	-29.0904	-71.4672	10	5	x				2010	L. Packer & G.S. Fraser				PCYU 0004657	PCYU
C.(H.)	deserticola		C.dsrt.104	F	III	Caleta Chañaral de Aceituna	-29.0904	-71.4672	10	5	x				2010	L. Packer & G.S. Fraser				PCYU 0004654	PCYU
C.(H.)	deserticola		C.dsrt.105	F	III	Caleta Chañaral de Aceituna	-29.0904	-71.4672	10	5	x				2010	L. Packer & G.S. Fraser				PCYU 0004652	PCYU
C.(H.)	deserticola		C.dsrt.106	F	III	Caleta Chañaral de Aceituna	-29.0904	-71.4672	10	5	x				2010	L. Packer & G.S. Fraser				PCYU 0004672	PCYU
C.(H.)	deserticola		C.dsrt.107	F	III	Huasco Prov., Carrizalillo	-29.0991	-71.3912	179	20	ix				2003	A. Ugarte					PCYU
C.(H.)	deserticola		C.dsrt.108	F	III	Huasco Prov., Carrizalillo	-29.0991	-71.3912	179	20	ix				2003	A. Ugarte					PCYU
C.(H.)	deserticola		C.dsrt.109	F	III	Huasco Prov., Carrizalillo	-29.0991	-71.3912	179	20	ix				2003	A. Ugarte					PCYU
C.(H.)	deserticola		C.dsrt.110	F	III	Huasco Prov., Carrizalillo	-29.0991	-71.3912	179	20	ix				2003	A. Ugarte					PCYU
C.(H.)	deserticola		C.dsrt.111	F	III	Huasco Prov., Carrizalillo	-29.0991	-71.3912	179	20	ix				2003	A. Ugarte					PCYU
C.(H.)	deserticola		C.dsrt.112	F	III	Huasco Prov., Chañar de Aceituno	-28.9534	-71.3472	279	18	ix				2003	A. Ugarte					PCYU
C.(H.)	deserticola		C.dsrt.113	F	III	Huasco Prov., Chañar de Aceituno	-28.9534	-71.3472	279	18	ix				2003	A. Ugarte					PCYU
C.(H.)	deserticola		C.dsrt.114	F	III	Huasco Prov., Chañar de Aceituno	-28.9534	-71.3472	279	18	ix				2003	A. Ugarte					PCYU
C.(H.)	deserticola		C.dsrt.115	F	III	Huasco Prov., Chañar de Aceituno	-28.9534	-71.3472	279	18	ix				2003	A. Ugarte					PCYU
C.(H.)	deserticola		C.dsrt.116	F	III	Huasco Prov., Chañar de Aceituno	-28.9534	-71.3472	279	18	ix				2003	A. Ugarte					PCYU
C.(H.)	deserticola		C.dsrt.117	F	III	Huasco Prov., Chañar de Aceituno	-28.9534	-71.3472	279	18	ix				2003	A. Ugarte					PCYU
C.(H.)	deserticola		C.dsrt.118	F	III	Huasco Prov., Chañar de Aceituno	-28.9534	-71.3472	279	18	ix				2003	A. Ugarte					PCYU
C.(H.)	deserticola		C.dsrt.119	F	III	Huasco Prov., Chañar de Aceituno	-28.9534	-71.3472	279	18	ix				2003	A. Ugarte					PCYU
C.(H.)	deserticola		C.dsrt.120	F	III	Huasco Prov., Chañar de Aceituno	-28.9534	-71.3472	279	18	ix				2003	A. Ugarte					PCYU
C.(H.)	deserticola		C.dsrt.121	F	III	Huasco Prov., Chañar de Aceituno	-28.9534	-71.3472	279	18	ix				2003	A. Ugarte					PCYU
C.(H.)	deserticola		C.dsrt.122	F	III	Huasco Prov., Chañar de Aceituno	-28.9534	-71.3472	279	18	ix				2003	A. Ugarte					PCYU
C.(H.)	deserticola		C.dsrt.123	F	III	Huasco Prov., Chañar de Aceituno	-29.0279	-71.4036	279	20	ix				2003	A. Ugarte					PCYU
C.(H.)	deserticola		C.dsrt.124	F	III	Huasco Prov., Chañar de Aceituno	-29.0279	-71.4036	279	20	ix				2003	A. Ugarte					PCYU
C.(H.)	deserticola		C.dsrt.125	F	III	Huasco Prov., Chañar de Aceituno	-29.0279	-71.4036	279	20	ix				2003	A. Ugarte					PCYU
C.(H.)	deserticola		C.dsrt.126	F	III	Huasco Prov., Chañar de Aceituno	-29.0279	-71.4036	279	20	ix				2003	A. Ugarte					PCYU
C.(H.)	deserticola		C.dsrt.127	F	III	Huasco Prov., Chañar de Aceituno	-29.0279	-71.4036	279	20	ix				2003	A. Ugarte					PCYU
C.(H.)	deserticola		C.dsrt.128	F	III	Huasco Prov., Chañar de Aceituno	-29.0279	-71.4036	279	20	ix				2003	A. Ugarte					PCYU
C.(H.)	deserticola		C.dsrt.129	F	III	Huasco Prov., Chañar de Aceituno	-29.0279	-71.4036	279	20	ix				2003	A. Ugarte					PCYU
C.(H.)	deserticola		C.dsrt.130	F	III	Huasco Prov., Chañar de Aceituno	-29.0279	-71.4036	279	20	ix				2003	A. Ugarte					PCYU
C.(H.)	deserticola		C.dsrt.131	F	III	Huasco Prov., Chañar de Aceituno	-29.0279	-71.4036	279	20	ix				2003	A. Ugarte					PCYU
C.(H.)	deserticola		C.dsrt.132	F	III	Huasco Prov., Chañar de Aceituno	-29.0279	-71.4036	279	20	ix				2003	A. Ugarte					PCYU
C.(H.)	deserticola		C.dsrt.133	F	III	Huasco Prov., Chañar de Aceituno	-29.0279	-71.4036	279	20	ix				2003	A. Ugarte					PCYU
C.(H.)	deserticola		C.dsrt.134	F	III	Huasco Prov., Chañar de Aceituno	-29.0279	-71.4036	279	20	ix				2003	A. Ugarte					PCYU
C.(H.)	deserticola		C.dsrt.135	F	III	Huasco Prov., Chañar de Aceituno	-29.0279	-71.4036	279	20	ix				2003	A. Ugarte					PCYU
C.(H.)	deserticola		C.dsrt.136	F	III	Huasco Prov., Chañar de Aceituno	-29.0279	-71.4036	279	20	ix				2003	A. Ugarte					PCYU
C.(H.)	deserticola		C.dsrt.137	F	III	Huasco Prov., Chañar de Aceituno	-29.0279	-71.4036	279	20	ix				2003	A. Ugarte					PCYU
C.(H.)	deserticola		C.dsrt.138	F	III	Huasco Prov., Chañar de Aceituno	-29.0279	-71.4036	279	20	ix				2003	A. Ugarte					PCYU
C.(H.)	deserticola		C.dsrt.139	F	III	Huasco Prov., Chañar de Aceituno	-29.0279	-71.4036	279	20	ix				2003	A. Ugarte					PCYU
C.(H.)	deserticola		C.dsrt.140	F	IV	Elqui Prov. 7 km S Pisco Elqui	-30.1765	-70.4862	1449	8	x				1994	Rozen, Quinter, Ascher					AMNH
C.(H.)	deserticola		C.dsrt.141	F	IV	Elqui: 4-5 km south Pisco	-30.3834	-70.3466	1340	27	x				1992	Andrey Sharkov					AMNH
C.(H.)	deserticola		C.dsrt.142	F	IV	Elqui Prov. 7 km S Pisco Elqui	-30.1765	-70.4862	1449	8	x				1994	Rozen, Quinter, Ascher					AMNH
C.(H.)	deserticola		C.dsrt.143	F	IV	Elqui Prov. 7 km S Pisco Elqui	-30.1765	-70.4862	1449	8	x				1994	Rozen, Quinter, Ascher					AMNH
C.(H.)	deserticola		C.dsrt.144	F	IV	Elqui Prov. 7 km S Pisco Elqui	-30.1765	-70.4862	1449	8	x				1994	Rozen, Quinter, Ascher					AMNH
C.(H.)	deserticola		C.dsrt.145	F	IV	Choapa: Los Vilos	-31.9122	-71.5112	54	18	xi				1991	Rozen, Pena, Ugarte	Cristaria				AMNH
C.(H.)	deserticola		C.dsrt.146	F	IV	Elqui Prov. 7 km S Pisco Elqui	-30.1765	-70.4862	1449	8	x				1994	Rozen, Quinter, Ascher					AMNH
C.(H.)	deserticola		C.dsrt.147	F	IV	Elqui Prov. 7 km S Pisco Elqui	-30.1765	-70.4862	1449	8	x				1994	Rozen, Quinter, Ascher					AMNH
C.(H.)	deserticola		C.dsrt.148	F	IV	Puerta Aldea near Tongoy	-30.301	-71.6063	9	26	x				2001	Packer & Fraser					PCYU
C.(H.)	deserticola		C.dsrt.149	F	IV	Choros Bajos	-29.2908	-71.3089	57	16	x				2000	L. Packer					PCYU
C.(H.)	deserticola		C.dsrt.150	F	III	11 km WNW Choros Bajos	-29.2649	-71.4112	10	16	x				2000	L. Packer					PCYU
C.(H.)	deserticola		C.dsrt.151	F	III	11 km WNW Choros Bajos	-29.2649	-71.4112	10	14	x				2001	L. Packer					PCYU
C.(H.)	deserticola		C.dsrt.152	F	III	11 km WNW Choros Bajos	-29.2649	-71.4112	10	14	x				2001	L. Packer					PCYU
C.(H.)	deserticola		C.dsrt.153	F	IV	Puerto Aldea near Tongoy	-30.301	-71.6063	9	26	x				2001	Packer & Fraser					PCYU
C.(H.)	deserticola		C.dsrt.154	F	IV	Puerto Aldea near Tongoy	-30.301	-71.6063	9	8	xi				2001	L. Packer					PCYU
C.(H.)	deserticola		C.dsrt.155	F	III	11 km WNW Choros Bajos	-29.2649	-71.4112	10	14	x				2001	L. Packer					PCYU
C.(H.)	deserticola		C.dsrt.156	F	IV	Tongoy Avda Costanera	-30.253	-71.494	9	26	x				2001	Packer & Fraser					PCYU
C.(H.)	deserticola		C.dsrt.157	F	IV	Puerto Aldea near Tongoy	-30.301	-71.6063	9	26	x				2001	Packer & Fraser					PCYU
C.(H.)	deserticola		C.dsrt.158	F	IV	Bahía Tongoy, S of Tongoy	-30.272	-71.483	25	8	x				2001	Packer & Fraser					PCYU
C.(H.)	deserticola		C.dsrt.159	F	IV	Quebrada Los Litres, SW of Tongoy, inland rd.	-30.3231	-71.5262	16	26	x				2001	Packer & Fraser					PCYU
C.(H.)	deserticola		C.dsrt.160	F	IV	Elqui Prov. 6 km S of Vicuña	-30.0852	-70.7246	889	16	x				1991	J.G. Rozen & L. Peña					AMNH
C.(H.)	deserticola		C.dsrt.161	F	IV	Elqui Prov. 8 km N of La Serena	-29.8373	-71.2607	16	7	xi				2000	J.G. Rozen					AMNH
C.(H.)	deserticola		C.dsrt.162	F	IV	Elqui Prov. 26 km S Vicuña	-30.1903	-70.6608	1691	5	x				1994	Rozen, Quinter, Ascher					AMNH
C.(H.)	deserticola		C.dsrt.163	F	IV	HWY 41, 2-4 km S of Vicuña	-30.0673	-70.726	755	9	x				2001	L. Packer					PCYU
C.(H.)	deserticola		C.dsrt.164	F	IV	Choros Bajos	-29.2908	-71.3089	57	12	x				1977	H. Flores					AMNH
C.(H.)	deserticola		C.dsrt.165	F	IV	Quebrada, El Arrayan, 15 km S La Villa	-30.071	-71.0007	400	20	xi				2003	F.D. Parker & M.E. Irwin		malaise trap		CH-56 FDP 109843	BBSL
C.(H.)	deserticola		C.dsrt.166	F	III	15km W of Domeyko (C-500)	-28.9668	-71.0365	587	15	x				2014	J. Postlethwaite					PCYU
C.(H.)	deserticola		C.dsrt.167	M	IV	Las Breas	-30.3685	-70.6128	1622	2016-11-19	ix				2010	L. Packer					PCYU
C.(H.)	diaguita	ALLOTYPE	-	F	IV	La Serena	-29.9063	-71.2502	20	20	iii				1952	Wagenknecht					AMNH
C.(H.)	diaguita	HOLOTYPE	-	M	IV	La Serena	-29.9063	-71.2502	20	28	ii				1956	Moure					AMNH
C.(H.)	diaguita		C.dgta.001	M	IV	Choros Bajos	-29.2908	-71.3089	57		x				1977	De La Hoz					PUCV	dissected terminalia
C.(H.)	diaguita		C.dgta.002	F	IV	Q. Los Choros	-29.343	-71.1553	232	12	x				1977	V. Cabezas					PUCV
C.(H.)	diaguita		C.dgta.003	M	IV	Cuesta Buenos Aires	-29.5624	-71.253	518	13	x		8	xi	2013	S. Monckton			CCDB-22789 D07		PCYU	dissected terminalia & hindleg
C.(H.)	diaguita		C.dgta.004	M	IV	Choros Bajos	-29.2908	-71.3089	57	12	x				1977	H. Flores					AMNH	dissected terminalia
C.(H.)	diaguita		C.dgta.005	M	IV	Cuesta Buenos Aires	-29.5624	-71.253	518	8	xi				2013	S. Monckton			CCDB-19989 B09	PCYU 0021683	PCYU
C.(H.)	diaguita		C.dgta.006	M	IV	Vicuña, Agric Exp. Station	-30.036	-70.6913	650	5	xi				2003	F.D. Parker & M.E. Irwin		pan trap		CH-56 FDP 110911	BBSL
C.(H.)	diaguita		C.dgta.007	M	IV	Vicuña, Agric Exp. Station	-30.036	-70.6913	650	5	xi				2003	F.D. Parker & M.E. Irwin		pan trap		CH-56 FDP 111827	BBSL
C.(H.)	diaguita		C.dgta.008	M	IV	Quebrada, El Arrayan, 33 km S La Villa	-30.1952	-70.9338	653	1	xi		8		2003	F.D. Parker & M.E. Irwin		malaise trap		CH-56 FDP 109942	BBSL
C.(H.)	diaguita		C.dgta.009	F	IV	Q. Los Choros	-29.343	-71.1553	232	11	x				1977	V. Cabezas					PUCV
C.(H.)	diaguita		C.dgta.010	F	IV	Q. Los Choros	-29.343	-71.1553	232	12	x				1977	V. Cabezas					PUCV
C.(H.)	diaguita		C.dgta.011	F	IV	Choros Bajos	-29.2908	-71.3089	57	12	x				1977	Magunacelaya					PUCV
C.(H.)	diaguita		C.dgta.012	F	IV	Q. Los Choros	-29.343	-71.1553	232	12	x				1977	V. Cabezas					PUCV
C.(H.)	diaguita		C.dgta.013	F	IV	Cuesta Buenos Aires	-29.5624	-71.253	518	13	x		8	xi	2013	S. Monckton		pan trap	CCDB-22789 D10		PCYU
C.(H.)	diaguita		C.dgta.014	F	IV	Vicuña, Agric Exp. Station	-30.036	-70.6913	650	5	xi				2003	F.D. Parker & M.E. Irwin		pan trap		CH-56 FDP 110929	BBSL
C.(H.)	diaguita		C.dgta.015	F	IV	Cuesta Buenos Aires	-29.5624	-71.253	518	8	xi				2013	S. Monckton					PCYU
C.(H.)	diaguita		C.dgta.016	F	IV	Cuesta Buenos Aires	-29.5624	-71.253	518	8	xi				2013	S. Monckton					PCYU
C.(H.)	diaguita		C.dgta.017	F	IV	Cuesta Buenos Aires	-29.5624	-71.253	518	8	xi				2013	S. Monckton					CTMI
C.(H.)	diaguita		C.dgta.018	F	IV	Cuesta Buenos Aires	-29.5624	-71.253	518	8	xi				2013	S. Monckton					CTMI
C.(H.)	diaguita		C.dgta.019	F	IV	Elqui Prov., Pangue	-30.1539	-70.6639	1686	2016-11-30	ix				2004	A. Ugarte					PCYU
C.(H.)	diaguita		C.dgta.020	F	IV	Cuesta Buenos Aires	-29.5624	-71.253	518	8	xi				2013	S. Monckton					PCYU
C.(H.)	diaguita		C.dgta.021	F	IV	1.1 km S on Rd to Tololo Observatory	-30.0358	-70.8158	543	22	x				2009	J. Gibbs					PCYU
C.(H.)	diaguita		C.dgta.022	F	IV	1.1 km S on Rd to Tololo Observatory	-30.0358	-70.8158	543	22	x				2009	J. Gibbs					PCYU
C.(H.)	diaguita		C.dgta.023	F	IV	1.1 km S on road to Tololo Obs.	-30.3058	-70.8151	1069	2016-11-22	x				2009	J. Gibbs				PCYU-CHL-09:134	PCYU
C.(H.)	diaguita		C.dgta.024	F	IV	Quebrada, El Arrayan, 15 km S La Villa	-30.1045	-70.9902	472	1	xi				2003	F.D. Parker & M.E. Irwin		pan trap		CH-11 FDP 111580	BBSL
C.(H.)	diaguita		C.dgta.025	F	IV	Vicuña, Agric Exp. Station	-30.036	-70.6913	650	5	xi				2003	F.D. Parker & M.E. Irwin		pan trap		CH-56 FDP 111935	BBSL
C.(H.)	diaguita		C.dgta.026	F	IV	Quebrada, El Arrayan, 15 km S La Villa	-30.071	-71.0007	400	20	xi				2003	F.D. Parker & M.E. Irwin		malaise trap		CH-56 FDP 109833	BBSL
C.(H.)	diaguita		C.dgta.027	F	IV	Vicuña, Agric Exp. Station	-30.036	-70.6913	650	5	xi				2003	F.D. Parker & M.E. Irwin		pan trap		CH-56 FDP 111836	BBSL
C.(H.)	diaguita		C.dgta.028	F	IV	Vicuña, Agric Exp. Station	-30.036	-70.6913	650	5	xi				2003	F.D. Parker & M.E. Irwin		pan trap		CH-56 FDP 111822	BBSL
C.(H.)	diaguita		C.vina.029	M	IV	El Tofo	-29.4423	-71.2518	631		x				1972	L. Ruz	Flourensia gagana				PUCV
C.(H.)	erithropoda	HOLOTYPE	-	M	IV	Pueblo Hundido	-30.0629	-70.4911	1031		x				1972	L. Ruz	Heliotropium stenophyllum				PUCV
C.(H.)	erithropoda		C.erit.001	M	III	Huasco prov., Carrizalillo	-29.0991	-71.3912	179	20	ix				2003	A. Ugarte			B10037-H10 Bees of Chile758		PCYU
C.(H.)	erithropoda		C.erit.002	F	III	Huasco prov., Carrizalillo	-29.0991	-71.3912	179	20	ix				2003	A. Ugarte			B10037-H9 Bees of Chile757		PCYU
C.(H.)	erithropoda		C.erit.003	M	IV	Los Choros	-29.2908	-71.3089	57	25	x				2002	J. Grixti & A. Zayed					PCYU	dissected abdomen & hindleg
C.(H.)	erithropoda		C.erit.004	M	III	Caleta Chañaral de Aceituna	-29.09	-71.467	8	18	ix				2003	L. Packer					PCYU
C.(H.)	erithropoda		C.erit.005	M	III	Caleta Chañaral de Aceituna	-29.0904	-71.4672	10	5	x				2010	L. Packer & G.S. Fraser				PCYU 0004648	PCYU
C.(H.)	erithropoda		C.erit.006	M	III	Caleta Chañaral de Aceituna	-29.0904	-71.4672	10	5	x				2010	L. Packer & G.S. Fraser				PCYU 0004662	PCYU
C.(H.)	erithropoda		C.erit.007	M	III	Caleta Chañaral de Aceituna	-29.0904	-71.4672	10	5	x				2010	L. Packer & G.S. Fraser				PCYU 0004658	PCYU
C.(H.)	erithropoda		C.erit.008	M	III	Caleta Chañaral de Aceituna	-29.0904	-71.4672	10	5	x				2010	L. Packer & G.S. Fraser				PCYU 0004650	PUCV
C.(H.)	erithropoda		C.erit.009	M	III	11km WNW Choros Bajos	-29.2649	-71.4112	10	14	x				2001	L. Packer			CCDB-03755 D02		PCYU
C.(H.)	erithropoda		C.erit.010	M	III	11km WNW Choros Bajos	-29.2649	-71.4112	10	14	x				2001	L. Packer					PCYU
C.(H.)	erithropoda		C.erit.011	M	III	11km WNW Choros Bajos	-29.2649	-71.4112	10	14	x				2001	L. Packer					PCYU
C.(H.)	erithropoda		C.erit.012	M	III	11km WNW Choros Bajos	-29.2649	-71.4112	10	14	x				2001	L. Packer					PCYU
C.(H.)	erithropoda		C.erit.013	M	III	11km WNW Choros Bajos	-29.2649	-71.4112	10	14	x				2001	L. Packer					PCYU
C.(H.)	erithropoda		C.erit.014	F	III	Caleta Carrizalillo	-29.1098	-71.4613	11	8	xi				2013	S. Monckton		pan trap	CCDB-19989 C06	PCYU 0021692	PCYU
C.(H.)	erithropoda		C.erit.015	F	III	Huasco prov., Carrizalillo	-29.0991	-71.3912	179	20	ix				2003	A. Ugarte			B10037-H07 Bees of Chile755		PCYU
C.(H.)	erithropoda		C.erit.016	F	III	Caleta Chañaral de Aceituna	-29.0904	-71.4672	10	5	x				2010	L. Packer & G.S. Fraser				PCYU 0004665	PUCV
C.(H.)	erithropoda		C.erit.017	F	III	Caleta Chañaral de Aceituna	-29.0904	-71.4672	10	5	x				2010	L. Packer & G.S. Fraser				PCYU 0004656	PCYU
C.(H.)	erithropoda		C.erit.018	F	III	Caleta Chañaral de Aceituna	-29.0904	-71.4672	10	5	x				2010	L. Packer & G.S. Fraser				PCYU 0004666	PCYU
C.(H.)	erithropoda		C.erit.019	F	IV	Dunes, Los Choros	-29.313	-71.2937	145	13	ix				2010	L. Packer			B09857-A06 Bees of Chile290		PCYU
C.(H.)	erithropoda		C.erit.020	M	IV	11 km WNW of Choros Bajos	-29.2649	-71.4112	10	14	x				2001	L. Packer					PCYU
C.(H.)	erithropoda		C.erit.021	M	III	Huasco Prov., Chañar de Aceituno	-28.9534	-71.3472	279	18	ix				2003	A. Ugarte					PCYU
C.(H.)	erithropoda		C.erit.022	M	III	Huasco Prov., Chañar de Aceituno	-28.9534	-71.3472	279	18	ix				2003	A. Ugarte					PCYU
C.(H.)	erithropoda		C.erit.023	M	III	Huasco Prov., Chañar de Aceituno	-29.0279	-71.4036	279	20	ix				2003	A. Ugarte					AMNH
C.(H.)	erithropoda		C.erit.024	M	III	Huasco Prov., Chañar de Aceituno	-28.9534	-71.3472	279	18	ix				2003	A. Ugarte					BBSL
C.(H.)	erithropoda		C.erit.025	M	III	Huasco Prov., Chañar de Aceituno	-29.0279	-71.4036	279	20	ix				2003	A. Ugarte					CTMI
C.(H.)	erithropoda		C.erit.026	F	III	Huasco Prov., Chañar de Aceituno	-28.9534	-71.3472	279	18	ix				2003	A. Ugarte					AMNH
C.(H.)	erithropoda		C.erit.027	F	III	Caleta Chañaral de Aceituna	-29.0904	-71.4672	10	5	x				2010	L. Packer & G.S. Fraser				PCYU 0004659	PCYU
C.(H.)	erithropoda		C.erit.028	F	IV	11 km WNW Choros Bajos	-29.2649	-71.4112	10	14	x				2001	L. Packer					PCYU
C.(H.)	erithropoda		C.erit.029	F	III	Huasco Prov., Chañar de Aceituno	-28.9534	-71.3472	279	18	ix				2003	A. Ugarte					BBSL
C.(H.)	erithropoda		C.erit.030	F	III	Huasco Prov., Chañar de Aceituno	-29.0279	-71.4036	279	20	ix				2003	A. Ugarte					CTMI
C.(H.)	erithropoda		C.erit.031	F	IV	11 km WNW of Choros Bajos	-29.2649	-71.4112	10	14	x				2001	L. Packer					PCYU
C.(H.)	erithropoda		C.erit.032	F	III	Caleta Carrizalillo	-29.1098	-71.4613	11	8	xi				2013	S. Monckton					PCYU
C.(H.)	erithropoda		C.erit.033	F	IV	11 km WNW of Choros Bajos	-29.2649	-71.4112	10	14	x				2001	L. Packer					PCYU
C.(H.)	erithropoda		C.erit.034	F	IV	Los Choros	-29.2908	-71.3089	57	25	x				2002	J. Grixti & A. Zayed		bright yellow pan			PCYU
C.(H.)	erithropoda		C.erit.035	F	IV	Los Choros	-29.2908	-71.3089	57	25	x				2002	J. Grixti & A. Zayed		yellow pan			PCYU
C.(H.)	erithropoda		C.erit.036	F	IV	Los Choros	-29.2908	-71.3089	57	25	x				2002	J. Grixti & A. Zayed		yellow pan			PCYU
C.(H.)	erithropoda		C.erit.037	F	IV	Los Choros	-29.2908	-71.3089	57	25	x				2002	J. Grixti & A. Zayed		yellow pan			PCYU
C.(H.)	erithropoda		C.erit.038	F	III	11 km WNW Choros Bajos	-29.2649	-71.4112	10	16	x				2000	L. Packer					PCYU
C.(H.)	erithropoda		C.erit.039	F	III	Caleta Carrizalillo	-29.1098	-71.4613	11	8	xi				2013	S. Monckton					PCYU
C.(H.)	erithropoda		C.erit.040	F	III	Caleta Carrizalillo	-29.1098	-71.4613	11	8	xi				2013	S. Monckton					PCYU
C.(H.)	guanicoe	HOLOTYPE	C.gnco.001	M	III	C-453, km 22 [Near Fundo La Semilla]	-28.1816	-69.826	1625	6	xi				2013	S. Monckton		fl. yellow pan trap (17d)	CCDB-19989 B08	PCYU 0021682	PCYU
C.(H.)	guanicoe	ALLOTYPE	C.gnco.002	F	III	C-35 km 51.5 [SE of Copiapó]	-27.8237	-70.1227	875	29	ix				2013	S. Monckton			CCDB-19989 A12	PCYU 0021674	PCYU
C.(H.)	guanicoe	PARATYPE	C.gnco.003	M	III	Rd to Pastos Largos, km 4	-28.1643	-69.7913	2127	11	xi				2013	S. Monckton & J. Postlethwaite					PCYU
C.(H.)	guanicoe	PARATYPE	C.gnco.004	M	III	Rd to Pastos Largos, km 4	-28.1643	-69.7913	2127	11	xi				2013	S. Monckton & J. Postlethwaite					AMNH
C.(H.)	guanicoe	PARATYPE	C.gnco.005	M	III	Las Juntas	-28.0032	-69.9758	1160	5	x				1982	C. Tobar					PUCV
C.(H.)	guanicoe	PARATYPE	C.gnco.006	M	III	E of Potrerillos, Hwy C-177, km 16	-26.4008	-69.3769	2488	16	xi				2013	J. Postlethwaite		blue pan	CCDB-22789 F02		PCYU
C.(H.)	guanicoe	PARATYPE	C.gnco.007	M	III	E of Potrerillos, C-177, km 24	-26.4585	-69.3272	2839	28	ix		16	xi	2013	J. Postlethwaite		pan trap			PCYU	dissected abdomen
C.(H.)	guanicoe	PARATYPE	C.gnco.008	M	III	Hwy C-269, km 0.5 (WP: 155) [E of Potrerillos]	-26.4763	-69.3214	3000	28	iii		24	iv	2013	J. Postlethwaite & S. Monckton		yellow cup			PCYU	dissected terminalia
C.(H.)	guanicoe	PARATYPE	C.gnco.009	F	III	Fundo La Semilla, 125 km SE Copiapó	-28.2507	-69.741	2358	17	x				2004	F.D. Parker & M.E. Irwin		pan trap	CHL-14509-54	FDP52511	BBSL
C.(H.)	guanicoe	PARATYPE	C.gnco.010	F	III	Fundo La Semilla, 125 km SE Copiapó	-28.2507	-69.741	2358	17	x				2004	F.D. Parker & M.E. Irwin		pan trap	CHL-14509-55	FDP52599	BBSL
C.(H.)	guanicoe	PARATYPE	C.gnco.011	F	III	Fundo La Semilla, 125 km SE Copiapó	-28.2507	-69.741	2358	17	x				2004	F.D. Parker & M.E. Irwin		pan trap	CHL-14509-56	FDP52403	BBSL
C.(H.)	guanicoe	PARATYPE	C.gnco.012	F	III	Fundo La Semilla, 125 km SE Copiapó	-28.2507	-69.741	2358	30	x				2003	F.D. Parker & M.E. Irwin		pan trap	CHL-14509-03	FDP4749; USDA Native Bee Survey BBSL699121	BBSL
C.(H.)	guanicoe	PARATYPE	C.gnco.013	F	III	Rd to Pastos Largos, km 0.5	-28.1802	-69.8047	1863	6	xi				2013	S. Monckton					PCYU
C.(H.)	guanicoe	PARATYPE	C.gnco.014	F	III	Rd to Pastos Largos, km 0.5	-28.1802	-69.8047	1863	6	xi		11	xii	2013	J. Postlethwaite & S. Monckton		pan trap			PCYU
C.(H.)	guanicoe	PARATYPE	C.gnco.015	F	III	Rd to Pastos Largos, km 4	-28.1643	-69.7913	2102	21	x		6	xi	2013	S. Monckton		pan trap			PCYU
C.(H.)	guanicoe	PARATYPE	C.gnco.016	F	III	Rd to Pastos Largos, km 4	-28.1643	-69.7913	2127	11	xi				2013	S. Monckton & J. Postlethwaite					PCYU
C.(H.)	guanicoe	PARATYPE	C.gnco.017	F	III	Rd to Pastos Largos, km 4	-28.1643	-69.7913	2127	11	xi				2013	S. Monckton & J. Postlethwaite					PCYU
C.(H.)	guanicoe	PARATYPE	C.gnco.018	F	III	Rd to Pastos Largos, km 4	-28.1643	-69.7913	2127	11	xi				2013	S. Monckton & J. Postlethwaite					BBSL
C.(H.)	guanicoe	PARATYPE	C.gnco.019	F	III	Rd to Pastos Largos, km 4	-28.1643	-69.7913	2127	11	xi				2013	S. Monckton & J. Postlethwaite					CTMI
C.(H.)	guanicoe	PARATYPE	C.gnco.020	F	III	Rd to Pastos Largos, km 4	-28.1643	-69.7913	2127	11	xi				2013	S. Monckton & J. Postlethwaite					AMNH
C.(H.)	guanicoe	PARATYPE	C.gnco.021	F	III	Las Juntas	-28.0032	-69.9758	1160	5	x				1982	R. Aldunate					PUCV
C.(H.)	guanicoe	PARATYPE	C.gnco.022	F	III	E of Potrerillos, C-177, km 24	-26.4585	-69.3272	2839	28	ix		16	xi	2013	J. Postlethwaite		pan trap			PCYU
C.(H.)	guanicoe	PARATYPE	C.gnco.023	F	III	E of El Maray	-27.6336	-70.0078	1316	3	xi	2015	4	ii	2016	L. Packer		pan trap			PCYU
C.(H.)	guanicoe	PARATYPE	C.gnco.024	F	III	E of El Maray	-27.6336	-70.0078	1316	3	xi	2015	4	ii	2016	L. Packer		pan trap			PCYU
C.(H.)	guanicoe	PARATYPE	C.gnco.025	M	III	Cuesta Castaño	-27.6931	-69.7539	2975	3	xi	2015	4	ii	2016	L. Packer		pan trap			PCYU
C.(H.)	guanicoe	PARATYPE	C.gnco.026	F	III	Cuesta Castaño	-27.6931	-69.7539	2975	3	xi	2015	4	ii	2016	L. Packer		pan trap			PCYU
C.(H.)	guanicoe	PARATYPE	C.gnco.027	F	III	Cuesta Castaño	-27.6931	-69.7539	2975	3	xi	2015	4	ii	2016	L. Packer		pan trap			PCYU
C.(H.)	guanicoe	PARATYPE	C.gnco.028	F	III	Cuesta Castaño	-27.6931	-69.7539	2975	3	xi	2015	4	ii	2016	L. Packer		pan trap			PCYU
C.(H.)	guanicoe	PARATYPE	C.gnco.029	F	III	Cuesta Castaño	-27.6931	-69.7539	2975	3	xi	2015	4	ii	2016	L. Packer		pan trap			PCYU
C.(H.)	guanicoe	PARATYPE	C.gnco.030	M	III	Cuesta Castaño	-27.6816	-69.7549	2672	3	xi	2015	4	ii	2016	L. Packer		pan trap			PCYU
C.(H.)	guanicoe	PARATYPE	C.gnco.031	F	III	Cuesta Castaño	-27.6816	-69.7549	2672	3	xi	2015	4	ii	2016	L. Packer		pan trap			PCYU
C.(H.)	guanicoe	PARATYPE	C.gnco.032	F	III	Cuesta Castaño	-27.6816	-69.7549	2672	3	xi	2015	4	ii	2016	L. Packer		pan trap			PCYU
C.(H.)	guanicoe	PARATYPE	C.gnco.033	F	III	Cuesta Castaño	-27.6816	-69.7549	2672	3	xi	2015	4	ii	2016	L. Packer		pan trap			PCYU
C.(H.)	guanicoe	PARATYPE	C.gnco.034	F	III	Finca las Herrera	-27.6676	-69.7901	2315	3	xi	2015	4	ii	2016	L. Packer		pan trap			PCYU
C.(H.)	katherinae	HOLOTYPE	C.kate.001	M	VII	Rio Teno nr. Estero Pichuante	-35.0863	-70.4971	1457	19	ii				2015	S. Monckton			CCDB-22014 E01		PCYU	dissected terminalia
C.(H.)	katherinae	ALLOTYPE	C.kate.002	F	VII	Rio Teno nr. Estero Pichuante	-35.0863	-70.4971	1457	19	ii				2015	S. Monckton					PCYU
C.(H.)	katherinae	PARATYPE	C.kate.003	M	VII	Los Queñes	-35.0006	-70.816	707	31	x				1983	J. Magunacelaya					PUCV	dissected terminalia
C.(H.)	katherinae	PARATYPE	C.kate.004	M	VII	Los Queñes	-35.0006	-70.816	707	31	x				1983	J. Magunacelaya					PUCV	dissected abdomen
C.(H.)	katherinae	PARATYPE	C.kate.005	M	VII	Los Queñes	-35.0006	-70.816	707	31	x				1983	J. Magunacelaya					PUCV	dissected abdomen
C.(H.)	katherinae	PARATYPE	C.kate.006	M	VII	Los Queñes	-35.0006	-70.816	707	31	x				1983	J. Magunacelaya					PUCV	dissected terminalia
C.(H.)	katherinae	PARATYPE	C.kate.007	F	VII	Rio Teno nr. Estero Pichuante	-35.0863	-70.4971	1457	28	ii		21	iii	2013	S. Monckton & J. Postlethwaite		pan trap			PCYU
C.(H.)	katherinae	PARATYPE	C.kate.008	F	VII	Rio Teno nr. Estero Pichuante	-35.0863	-70.4971	1457	2	iii				2015	S. Monckton					PCYU
C.(H.)	katherinae	PARATYPE	C.kate.009	F	VII	Rio Teno nr. Estero Pichuante	-35.0863	-70.4971	1457	2	iii				2015	S. Monckton					CTMI
C.(H.)	katherinae	PARATYPE	C.kate.010	F	VII	E of Los Queñes	-35.0282	-70.713	817	1	i				2013	L. Packer & R. Smith			CCDB-19991 C07		PCYU
C.(H.)	katherinae	PARATYPE	C.kate.011	F	VII	E of Los Queñes	-35.0282	-70.713	817	1	i				2013	L. Packer & R. Smith			CCDB-19991 C08		PCYU
C.(H.)	katherinae	PARATYPE	C.kate.012	F	VII	Los Queñes	-35.0006	-70.816	707	31	x				1983	F. Rodriguez					BBSL
C.(H.)	katherinae	PARATYPE	C.kate.013	F	VII	Los Queñes	-35.0006	-70.816	707	31	x				1983	F. Rodriguez					BBSL
C.(H.)	katherinae	PARATYPE	C.kate.014	F	VII	Los Queñes	-35.0006	-70.816	707	31	x				1983	F. Rodriguez					BBSL
C.(H.)	katherinae	PARATYPE	C.kate.015	F	VII	Los Queñes	-35.0006	-70.816	707	31	x				1983	F. Rodriguez					BBSL
C.(H.)	katherinae	PARATYPE	C.kate.016	F	VII	Los Queñes	-35.0006	-70.816	707	31	x				1983	C. Tobar					PUCV
C.(H.)	katherinae	PARATYPE	C.kate.017	F	VIII	Las Trancas	-36.9107	-71.4797	1250	10	xi				1976	H. Toro					AMNH
C.(H.)	katherinae	PARATYPE	C.kate.018	F	VIII	Ñuble: Shangrila (near Las Trancas)	-36.8765	-71.4683	1549	13	xii		15		1983	Luis E. Peña					AMNH
C.(H.)	katherinae	PARATYPE	C.kate.019	F	VIII	Ñuble: Shangrila (near Las Trancas)	-36.8765	-71.4683	1549	13	xii		15		1983	Luis E. Peña					AMNH
C.(H.)	katherinae	PARATYPE	C.kate.020	F	VIII	Las Cabras, mts. In Chillan area, S Chillan Volcano, Ñuble Prov.	-36.9178	-71.4292	1500	31	vi				1963	Luis E. Peña					AMNH
C.(H.)	katherinae	PARATYPE	C.kate.021	F	VIII	Ñuble: Shangri-la, Las Trancas, SE of Recinto	-36.8765	-71.4683	1549	13	xii		17			Luis E. Peña					AMNH
C.(H.)	katherinae	PARATYPE	C.kate.022	F	VII	Río Teno	-35.0442	-70.5909	1241	22	ii				2016	L. Packer					PCYU
C.(H.)	lickana	HOLOTYPE	C.lkna.001	M	II	5.1km NNE of San Pedro	-22.8716	-68.1771	2531	14	x				2001	L. Packer					PCYU
C.(H.)	lickana	ALLOTYPE	C.lkna.002	F	II	B-245 km 12, N of SP de Atacama	-22.8272	-68.1289	2801	6	xii				2013	J. Postlethwaite			CCDB-19989 D06		PCYU
C.(H.)	lickana	PARATYPE	C.lkna.003	M	II	Aguas Blancas SE of San Pedro de Atacama	-23.2677	-67.9951	2474	12	x				2001	Packer & Fraser			CCDB-22789 D12		PCYU
C.(H.)	lickana	PARATYPE	C.lkna.004	F	II	Aguas Blancas SE of San Pedro de Atacama	-23.2677	-67.9951	2474	12	x				2001	Packer & Fraser			CCDB-03755 E11		PCYU
C.(H.)	lickana	PARATYPE	C.lkna.005	M/F	II	Aguas Blancas SE of San Pedro de Atacama	-23.2677	-67.9951	2474	12	x				2001	Packer & Fraser					PCYU	cleared specimens (mixed M&F)
C.(H.)	mantagua	HOLOTYPE	-	M	V	Lilenes	-32.9279	-71.5455	19	13	i				1967	Toro					AMNH
C.(H.)	mantagua	ALLOTYPE	-	F	V	Lilenes	-32.9279	-71.5455	19	13	i				1967	De la Hoz					AMNH
C.(H.)	mantagua	former holotype C. valparaiso	-	M	V	Peñuelas	-33.1491	-71.5587	362		i				1975	Cerda					AMNH
C.(H.)	mantagua	PARATYPE	C.mtga.001	M	V	Mantagua	-32.8656	-71.4905	15		xii				1971	H. Toro G.					AMNH
C.(H.)	mantagua	PARATYPE	C.mtga.002	F	V	Lilenes	-32.9279	-71.5455	19	5	x				1975	L. Ruz					PUCV
C.(H.)	mantagua	PARATYPE	C.mtga.003	M	V	Mantagua	-32.8656	-71.4905	15		xii				1971	H. Toro G.					AMNH
C.(H.)	mantagua	PARATYPE	C.mtga.004	M	V	Mantagua	-32.8656	-71.4905	15		xii				1971	H. Toro G.					AMNH
C.(H.)	mantagua	PARATYPE	C.mtga.005	M	V	Mantagua	-32.8656	-71.4905	15	13	i				1967	H. Toro G.					AMNH
C.(H.)	mantagua	PARATYPE	C.mtga.006	M	V	Pr. Valp., Lilenes	-32.9279	-71.5455	19	5	x				1975	H. Toro				PUCV-ENTO 21467	PUCV	dissected abdomen
C.(H.)	mantagua	PARATYPE	C.mtga.007	M	V	Lilenes	-32.9279	-71.5455	19	23	x				1966	De la Hoz					AMNH	dissected mouthparts
C.(H.)	mantagua	PARATYPE	C.mtga.008	M	V	Lilenes	-32.9279	-71.5455	19	25	x				1966	De la Hoz					AMNH
C.(H.)	mantagua	PARATYPE	C.mtga.009	M	V	Lilenes	-32.9279	-71.5455	19	23	x				1966	H. Toro G.					AMNH
C.(H.)	mantagua	PARATYPE	C.mtga.010	M	V	Lilenes	-32.9279	-71.5455	19	5	x				1975	H. Toro				PUCV-ENTO 21474	PUCV
C.(H.)	mantagua	PARATYPE	C.mtga.011	M	V	Reñaca	-32.972	-71.5443	14	20	xi				1966	De la Hoz					AMNH
C.(H.)	mantagua	PARATYPE	C.mtga.012	M	V	Reñaca	-32.972	-71.5443	14	20	xi				1966	De la Hoz					AMNH
C.(H.)	mantagua	PARATYPE	C.mtga.013	F	V	Lilenes	-32.9279	-71.5455	19	5	x				1975	L. Ruz				PUCV-ENTO 21480	PUCV
C.(H.)	mantagua	PARATYPE	C.mtga.014	F	V	Lilenes	-32.9279	-71.5455	19	5	x				1975	L. Ruz				PUCV-ENTO 21481	PUCV
C.(H.)	mantagua	PARATYPE	C.mtga.015	F	V	Pr. Aconcagua				5	xi				1971	A.R. Moldenke	Chaetanthera linearis			INT. BIOL. PROGRAM 45330	AMNH
C.(H.)	mantagua		C.mtga.016	M	V	Viña del Mar	-33.0245	-71.5523	18		xi				1988	Fritz					AMNH
C.(H.)	mantagua		C.mtga.017	M	V	Viña del Mar	-33.0245	-71.5523	18		xi				1988	Fritz					AMNH
C.(H.)	mantagua		C.mtga.018	M	V	Viña del Mar	-33.0245	-71.5523	18		xi				1990	Fritz					AMNH
C.(H.)	mantagua		C.mtga.019	M	V	Viña del Mar	-33.0245	-71.5523	18		xi				1988	Fritz					AMNH
C.(H.)	mantagua		C.mtga.020	M	V	Viña del Mar	-33.0245	-71.5523	18		xi				1988	Fritz					AMNH
C.(H.)	mantagua		C.mtga.021	M	V	Reñaca	-32.972	-71.5443	14	22	x				1994	J.G. Rozen					AMNH
C.(H.)	mantagua		C.mtga.022	M	V	Concón	-32.9167	-71.5	60	21	x				2008	K.S. Ramos			CCDB-06736 F02	PCYU-KCC-10040	PCYU
C.(H.)	mantagua		C.mtga.023	M	V	Concón	-32.9167	-71.5	60	21	x				2008	K.S. Ramos			CCDB-06736 F03	PCYU-KCC-10041	PCYU
C.(H.)	mantagua		C.mtga.024	M	V	Playa Ritoque, N of Concón	-32.849	-71.515	13	5	x				2000	L. Packer			CCDB-03755 A04		PCYU
C.(H.)	mantagua		C.mtga.025	F	V	Playa Ritoque, N of Concón	-32.849	-71.515	13	5	x				2000	L. Packer					PCYU
C.(H.)	mantagua		C.mtga.026	F	V	Concón	-32.9167	-71.5	60	21	x				2008	K.S. Ramos			CCDB-06736 F01	PCYU-KCC-10039	PCYU
C.(H.)	mantagua		C.mtga.027	F	V	Concón	-32.9167	-71.5	60	21	x				2008	K.S. Ramos			CCDB-06736 E12	PCYU-KCC-10038	PCYU
C.(H.)	mantagua		C.mtga.028	M	V	Aconcagua Prov. Papudo/Zapallar				5	xi				1971	A.R. Moldenke	Chorizanthe vaginata			INT BIOL PROGRAM 45387	AMNH
C.(H.)	mantagua		C.mtga.029	M	V	Aconcagua Prov. Papudo/Zapallar										H. Toro					AMNH
C.(H.)	mantagua		C.mtga.030	M	V	Aconcagua Prov. Papudo/Zapallar				5	xi				1971	A.R. Moldenke	Chaetanthera linearis			INT BIOL PROGRAM 45330	AMNH
C.(H.)	mantagua		C.mtga.031	M	V	Dunas de Concon	-32.941	-71.552	41	12	i				1976	G. Cerda					AMNH
C.(H.)	mantagua		C.mtga.032	M	V	Reñaca	-32.972	-71.5443	14	17	i				1973	G. Cerda					AMNH
C.(H.)	mantagua		C.mtga.033	M	V	Lilenes	-32.928	-71.5457	19	26	x				1979	L. Ruz					PUCV
C.(H.)	mantagua		C.mtga.034	M	V	Playa Ritoque, N of Concón	-32.849	-71.515	13	5	x				2000	L. Packer					PCYU
C.(H.)	mantagua		C.mtga.035	M	V	Playa Ritoque, N of Concón	-32.849	-71.515	13	5	x				2000	L. Packer					PCYU
C.(H.)	mantagua		C.mtga.036	M	V	Playa Ritoque, N of Concón	-32.849	-71.515	13	5	x				2000	L. Packer					PCYU
C.(H.)	mantagua		C.mtga.037	M	V	Playa Ritoque, N of Concón	-32.849	-71.515	13	5	x				2000	L. Packer					CTMI
C.(H.)	mantagua		C.mtga.038	M	V	Viña del Mar	-33.0245	-71.5523	18		xi				1990	Fritz					AMNH
C.(H.)	mantagua		C.mtga.039	M	V	Viña del Mar	-33.0245	-71.5523	18		xi				1990	Fritz					AMNH
C.(H.)	mantagua		C.mtga.040	M	V	Mantagua Dunas	-32.8648	-71.4944	13	12	i				1976	Gaslon Cerda B					PUCV
C.(H.)	mantagua		C.mtga.041	M	V	Playa Ritoque, N of Concon	-32.849	-71.515	13	5	x				2000	L. Packer					PCYU
C.(H.)	mantagua		C.mtga.042	M	V	Playa Ritoque, N of Concon	-32.8492	-71.515	13	5	x				2000	L. Packer					PCYU	cleared specimen
C.(H.)	mantagua		C.mtga.043	M	V	Playa Ritoque, N of Concon	-32.8492	-71.515	13	5	x				2000	L. Packer					PCYU	cleared specimen
C.(H.)	mantagua		C.mtga.044	F	V	Playa Ritoque, N of Concón	-32.849	-71.515	13	5	x				2000	L. Packer					PCYU
C.(H.)	mantagua		C.mtga.045	F	V	Playa Ritoque, N of Concón	-32.849	-71.515	13	5	x				2000	L. Packer					PCYU
C.(H.)	mantagua		C.mtga.046	F	IV	Choapa, Pichidangui	-32.1383	-71.5067	15	10	xi				2003	F.D. Parker		pan trap	CHL-14510-85	Native Bee Survey BBSL695300	BBSL
C.(H.)	mantagua		C.mtga.047	F	V	Playa Ritoque, N of Concón	-32.849	-71.515	13	5	x				2000	L. Packer					PCYU
C.(H.)	mantagua		C.mtga.048	F	V	Mantagua	-32.8656	-71.4905	15	26	xi				1976	H. Toro Jr					AMNH
C.(H.)	mantagua		C.mtga.049	F	V	Curauma	-33.0153	-71.5411	61	5	i				2000	F. Vivallo					UFRJ
C.(H.)	mantagua		C.mtga.050	F	V	Lilenes Alto	-32.9342	-71.5437	74		i				2000	F. Vivallo					UFRJ
C.(H.)	mantagua		C.mtga.051	F	V	Playa Ritoque, N of Concon	-32.849	-71.515	13	5	x				2000	L. Packer					CTMI
C.(H.)	mantagua		C.mtga.052	F	V	Peñuelas	-33.1491	-71.5587	362	22	i				1975	Cerda					AMNH
C.(H.)	mantagua		C.mtga.053	F	V	Mantagua	-32.8656	-71.4905	15	2	ii				1967	H. Toro				PUCV-ENTO 21990	PUCV
C.(H.)	mantagua		C.mtga.054	F	V	Aconcagua Prov.				12	i				1973	A.R. Moldenke	Carpobrotus chilensis			INT BIOL PROGRAM 45397	AMNH
C.(H.)	mantagua		C.mtga.055	F	V	Playa Ritoque, N of Concón	-32.849	-71.515	13	5	x				2000	L. Packer					PCYU
C.(H.)	mavida	ALLOTYPE	-	F	IV	Baños del Toro	-29.8375	-70.0261	3202		i				1970	Toro					AMNH
C.(H.)	mavida	HOLOTYPE	-	M	IV	Baños del Toro	-29.8375	-70.0261	3202		i				1970	Toro					AMNH
C.(H.)	mavida	PARATYPE	C.mvda.001	M	IV	Laguna Dam	-30.2058	-70.0418	3170	5	xii				1950	Ross & Michelbacher					AMNH
C.(H.)	mavida		C.mvda.002	F	IV	W of Junta Toro, 41-CH km 146	-29.9675	-70.1285	1977	8	xi				2013	S. Monckton		pan trap	CCDB-19989 D01	PCYU 0021694	PCYU
C.(H.)	mavida	PARATYPE	C.mvda.003	M	IV	Laguna Dam	-30.2058	-70.0418	3170	5	xii				1950	Ross & Michelbacher					AMNH
C.(H.)	mavida	PARATYPE	C.mvda.004	M	IV	Laguna Dam	-30.2058	-70.0418	3170	5	xii				1950	Ross & Michelbacher					AMNH
C.(H.)	mavida	PARATYPE	C.mvda.005	M	IV	Laguna Dam	-30.2058	-70.0418	3170	5	xii				1950	Ross & Michelbacher					AMNH
C.(H.)	mavida	PARATYPE	C.mvda.006	M	IV	Laguna Dam	-30.2058	-70.0418	3170	5	xii				1950	Ross & Michelbacher					AMNH	dissected terminalia
C.(H.)	mavida	PARATYPE	C.mvda.007	M	IV	Rio Laguna	-30.1906	-70.0466	3000		i				1970	Dazarola					AMNH
C.(H.)	mavida	PARATYPE	C.mvda.008	M	IV	Baños del Toro	-29.8375	-70.0261	3202		i				1970	H. Toro					AMNH
C.(H.)	mavida		C.mvda.009	M	IV	41-CH km, 137.8	-29.967	-70.1936	1800	8	xi				2013	S. Monckton		pan trap	CCDB-19989 B10	PCYU 0021684	PCYU
C.(H.)	mavida		C.mvda.010	M	IV	41-CH km km 171, N of Emb La Laguna	-30.1787	-70.0473	2942	15	xii				2013	J. Postlethwaite			CCDB-19989 D05		PCYU
C.(H.)	mavida		C.mvda.011	M	IV	Elqui: El Pangue, 24 km S of Vicuña	-30.1677	-70.6627	1711	31	x				1992	Snyder & Sharkov					AMNH
C.(H.)	mavida		C.mvda.012	M	V	Portillo	-32.8507	-70.1339	2612	30	xii				2009	L. Packer	Stachys			PCYU CHI09-2-2-039	PCYU	cleared terminalia
C.(H.)	mavida		C.mvda.013	M	V	Portillo	-32.8372	-70.1296	2870	11	i				2009	L. Packer	Phacelia			PCYU CHI09-13-1-003	PUCV
C.(H.)	mavida		C.mvda.014	F	IV	Baños del Toro	-29.8375	-70.0261	3202						1970						AMNH
C.(H.)	mavida		C.mvda.015	F	IV	W of Junta Toro, 41-CH km 146	-29.9675	-70.1285	1977	8	xi				2013	S. Monckton		pan trap	CCDB-19989 D02	PCYU 0021695	PCYU
C.(H.)	mavida		C.mvda.016	F	V	Portillo	-32.8507	-70.1339	2612	30	xii				2009	L. Packer	Stachys			PCYU CHI09-2-2-038	PCYU
C.(H.)	mavida		C.mvda.017	F	V	Portillo	-32.8507	-70.1339	2612	30	xii				2009	L. Packer				PCYU CHI09-2-2-031	PCYU
C.(H.)	mavida		C.mvda.018	F	V	Portillo Aduanas	-32.8304	-70.0905	3210	10	i				2009	L. Packer	Phacelia			PCYU CHI09-13-2-011	PCYU
C.(H.)	mavida		C.mvda.019	F	V	Portillo	-32.8372	-70.1296	2870	11	i				2009	L. Packer	Phacelia			PCYU CHI09-13-1-004	PUCV
C.(H.)	mavida		C.mvda.020	F	V	Portillo	-32.8372	-70.1296	2870	11	i				2009	L. Packer	Phacelia			PCYU CHI09-13-1-009	PCYU
C.(H.)	mavida		C.mvda.021	F	V	Portillo	-32.8372	-70.1296	2870	11	i				2009	L. Packer	Phacelia			PCYU CHI09-13-1-006	BBSL
C.(H.)	mavida		C.mvda.022	F	V	Portillo	-32.8372	-70.1296	2870	11	i				2009	L. Packer	Phacelia			PCYU CHI09-13-1-002	BBSL
C.(H.)	mavida		C.mvda.023	F	V	Portillo	-32.8372	-70.1296	2870	11	i				2009	L. Packer	Phacelia			PCYU CHI09-13-1-007	CTMI
C.(H.)	mavida		C.mvda.024	F	V	Portillo	-32.8372	-70.1296	2870	11	i				2009	L. Packer	Phacelia			PCYU CHI09-13-1-008	CTMI
C.(H.)	mavida		C.mvda.025	M	IV	Elqui: El Pangue, 24 km S of Vicuña	-30.1677	-70.6627	1711	31	x				1992	Snyder & Sharkov					AMNH
C.(H.)	mavida		C.mvda.026	M	IV	Elqui Prov. 26 km S of Vicuña	-30.1903	-70.6608	1691	29	x				1992	Rozen, Sharkov, Snyder					AMNH
C.(H.)	mavida		C.mvda.027	M	V	Guardia Vieja mountain, Aconcagua Prov.	-32.9035	-70.2723	1600	17	ix				1964	L. E. Peña					AMNH
C.(H.)	mavida		C.mvda.028	M	IV	Rio Laguna	-30.1906	-70.0466	3000	8	i				1970	H. Toro					PUCV
C.(H.)	mavida		C.mvda.029	M	V	Portillo	-32.8372	-70.1296	2873	11	i				2009	L. Packer	Phacelia			PCYU CHI09-13-1-005	PCYU
C.(H.)	mavida		C.mvda.030	M	IV	E of Vicuña, 127.8 km	-29.9777	-70.2293	1711	12	ix		19		2010	L. Packer					PCYU
C.(H.)	mavida		C.mvda.031	M	IV	Rio Laguna	-30.1906	-70.0466	3000						1970	H. Toro					AMNH
C.(H.)	mavida		C.mvda.032	F	V	Portillo	-32.8372	-70.1296	2870	30	xii				2008	L. Packer				PCYU CHI09-2-1-018	PCYU
C.(H.)	mavida		C.mvda.033	F	IV	Limarí Prov. Las Mollacas, E Monte Patria	-30.7535	-70.6573	1142	13	x				1994	Rozen, Quinter, Ascher	Oxalis				AMNH
C.(H.)	mavida		C.mvda.034	F	IV	Elqui Prov., Pangue	-30.1539	-70.6639	1686	11	ix		30		2004	A. Ugarte					PCYU
C.(H.)	mavida		C.mvda.035	F	IV	Limarí Prov. Las Mollacas, E Monte Patria	-30.7535	-70.6573	1142	13	x				1994	Rozen, Quinter, Ascher	Oxalis				AMNH
C.(H.)	mavida		C.mvda.036	F	IV	Elqui Prov. 26 km S of Vicuña	-30.1903	-70.6608	1691	29	x				1992	Rozen, Sharkov, Snyder					AMNH
C.(H.)	mavida		C.mvda.037	F	IV	Limarí Prov. Las Mollacas, E Monte Patria	-30.7535	-70.6573	1142	13	x				1994	Rozen, Quinter, Ascher	Oxalis				AMNH
C.(H.)	mavida	PARATYPE	C.mvda.038	F	IV	Limari Prov., Chañar	-30.2804	-70.6402	1564	4	ix				2004	L. Packer					PCYU
C.(H.)	mavida		C.mvda.038	M	IV	CH-41 km 165, S. of La Laguna	-30.1479	-70.0518	2767	15	xii				2013	L. Packer					PCYU
C.(H.)	mayu	HOLOTYPE	C.mayu.001	M	IX	Cuesta Las Raíces	-38.4299	-71.4489	1583	12	ii				2013	S. Monckton & R. Smith			CCDB-19989 G08		PCYU	dissected terminalia
C.(H.)	mayu	ALLOTYPE	C.mayu.002	F	IX	Cuesta Las Raíces	-38.4299	-71.4489	1583	12	ii				2013	S. Monckton & R. Smith			CCDB-19989 G09		PCYU
C.(H.)	mayu	PARATYPE	C.mayu.003	M	VIII	Ñuble, Las Trancas, SE Recinto in Chillán area	-36.9107	-71.4797	1250		ii				1987	Luis E. Peña					AMNH
C.(H.)	mayu	PARATYPE	C.mayu.004	M	VIII	Near Termas de Chillan	-36.9057	-71.4097	1691	27	xii				2006	L. Packer					PCYU
C.(H.)	mayu	PARATYPE	C.mayu.005	M	VII	Laguna del Maule	-36.0027	-70.4555	2227	9	i				2009	L. Packer	Phacelia		CCDB-22789 D04	PCYU CHI09-7-2-005	PCYU	dissected terminalia
C.(H.)	mayu	PARATYPE	C.mayu.006	M	VII	Rio Maule, 122 km marker	-35.9016	-70.6426	1359	6	i				2013	L. Packer & R. Smith					PCYU
C.(H.)	mayu	PARATYPE	C.mayu.007	F	VIII	Ñuble, Las Trancas	-36.9107	-71.4797	1250		xii				1993	L. Peña					AMNH
C.(H.)	mayu	PARATYPE	C.mayu.008	F	VIII	Ñuble: Las Trancas, SE Recinto in Chillan area	-36.9107	-71.4797	1250		ii				1987	Luis E. Peña					AMNH
C.(H.)	mayu	PARATYPE	C.mayu.009	F	VIII	Termas de Chillan	-36.9057	-71.4097	1691	13	ii				1976	H. Toro					AMNH
C.(H.)	mayu	PARATYPE	C.mayu.010	F	VIII	Chillan, Las Trancas	-36.9107	-71.4797	1250	11	ii				1976	H. Toro Jr					AMNH
C.(H.)	mayu	PARATYPE	C.mayu.011	F	VIII	Las Trancas, Los Nirres	-36.9121	-71.5026	1221	12	xii				2006	L. Packer					PCYU
C.(H.)	mayu	PARATYPE	C.mayu.012	F	VIII	Las Trancas	-36.9107	-71.4797	1250	11	xii				2006	L. Packer					PCYU
C.(H.)	neffi	HOLOTYPE	-	M	II	Taltal	-25.4064	-70.4808	39	30	ix				1972	J. Neff					AMNH
C.(H.)	neffi	ALLOTYPE	-	F	II	Taltal	-25.4064	-70.4808	39	30	ix				1972	J. Neff					AMNH
C.(H.)	neffi		C.neff.001	M	II	Cuesta Paposo	-25.0186	-70.4271	676	24	x				2013	S. Monckton				PCYU 0021578	PCYU
C.(H.)	neffi		C.neff.002	F	II	Cuesta Paposo	-25.0186	-70.4271	676	24	x				2013	S. Monckton			CCDB-22791 E02	PCYU 0021646	PCYU
C.(H.)	neffi	PARATYPE	C.neff.003	F	II	Taltal	-25.4064	-70.4808	39	1	x				1972	J.L. Neff	Cristaria				AMNH
C.(H.)	neffi	PARATYPE	C.neff.004	F	II	Taltal	-25.4064	-70.4808	39	1	x				1972	J.L. Neff	Balbisia peduncularis				AMNH
C.(H.)	neffi	PARATYPE	C.neff.005	F	II	Taltal	-25.4064	-70.4808	39	30	ix				1972	J.L. Neff	Oxalis				AMNH
C.(H.)	neffi		C.neff.006	M	II	Paposo	-25.0027	-70.4627	39	1	x				1983	R. Aldunate					PUCV	cleared specimen
C.(H.)	neffi		C.neff.007	M	II	Paposo	-25.0027	-70.4627	39	1	x				1983	R. Aldunate					PUCV
C.(H.)	neffi		C.neff.008	M	II	Paposo	-25.0027	-70.4627	39	1	x				1983	R. Aldunate					PUCV
C.(H.)	neffi		C.neff.009	M	II	Paposo	-25.0027	-70.4627	39	1	x				1983	R. Aldunate					PUCV
C.(H.)	neffi		C.neff.010	M	II	Paposo	-25.0027	-70.4627	39	1	x				1983	R. Aldunate					PUCV
C.(H.)	neffi		C.neff.011	M	II	Cuesta Paposo	-25.0186	-70.4271	676	5	xi				2013	S. Monckton			CCDB-19989 A01	PCYU 0021663	PCYU
C.(H.)	neffi		C.neff.012	M	II	~13km S of Paposo	-25.1111	-70.4835	21	29	ix		4	x	2002	J Grixti & A Zayed		yellow pan			PCYU
C.(H.)	neffi		C.neff.013	M	II	~13km S of Paposo	-25.1111	-70.4835	21	29	ix		4	x	2002	J Grixti & A Zayed		yellow pan			PCYU
C.(H.)	neffi		C.neff.014	M	II	~13km S of Paposo	-25.1111	-70.4835	21	29	ix		4	x	2002	J Grixti & A Zayed					PCYU
C.(H.)	neffi		C.neff.015	M	II	~13km S of Paposo	-25.1111	-70.4835	21	29	ix		4	x	2002	J Grixti & A Zayed		yellow pan			PCYU
C.(H.)	neffi		C.neff.016	M	II	~13km S of Paposo	-25.1111	-70.4835	21	29	ix		4	x	2002	J Grixti & A Zayed		yellow pan			PCYU
C.(H.)	neffi		C.neff.017	M	II	~13km S of Paposo	-25.1111	-70.4835	21	29	ix		4	x	2002	J Grixti & A Zayed		yellow pan			PCYU
C.(H.)	neffi		C.neff.018	M	II	~13km S of Paposo	-25.1111	-70.4835	21	29	ix		4	x	2002	J Grixti & A Zayed		yellow pan			PCYU
C.(H.)	neffi		C.neff.019	M	II	SE of Taltal, Ruta 1, km 11	-25.4936	-70.4213	499	17	xi				2013	J. Postlethwaite		white pan	CCDB-22789 D08		PCYU
C.(H.)	neffi		C.neff.020	M	II	SE of Taltal, Ruta 1, km 11	-25.4936	-70.4213	499	27	ix		17	xi	2013	J. Postlethwaite & S. Monckton		yellow cup			PCYU
C.(H.)	neffi		C.neff.021	M	II	SE of Taltal, Ruta 1, km 11	-25.4936	-70.4213	499	27	ix		17	xi	2013	J. Postlethwaite & S. Monckton		blue cup			PCYU
C.(H.)	neffi		C.neff.022	M	II	SE of Taltal, Ruta 1, km 11	-25.4936	-70.4213	499	27	ix		17	xi	2013	J. Postlethwaite & S. Monckton		blue cup			PCYU
C.(H.)	neffi		C.neff.023	F	II	Cuesta Paposo	-25.0186	-70.4271	676	5	xi				2013	S. Monckton			CCDB-19989 A02	PCYU 0021664	PCYU
C.(H.)	neffi		C.neff.024	F	II	Cuesta Paposo	-25.0186	-70.4271	676	24	x				2013	S. Monckton				PCYU 0021645	PCYU
C.(H.)	neffi		C.neff.025	F	II	Cuesta Paposo	-25.0186	-70.4271	676	5	xi				2013	S. Monckton				PCYU 0021579	PCYU
C.(H.)	neffi		C.neff.026	F	II	Cuesta Paposo	-25.0186	-70.4271	676	5	xi				2013	S. Monckton				PCYU 0021580	PCYU
C.(H.)	neffi		C.neff.027	F	II	~13km S of Paposo	-25.1111	-70.4835	21	29	ix		4	x	2002	J Grixti & A Zayed		yellow pan			PCYU
C.(H.)	neffi		C.neff.028	F	II	~13km S of Paposo	-25.1111	-70.4835	21	29	ix		4	x	2002	J Grixti & A Zayed		yellow pan			PCYU
C.(H.)	neffi		C.neff.029	F	II	~13km S of Paposo	-25.1111	-70.4835	21	29	ix		4	x	2002	J Grixti & A Zayed		yellow pan			PCYU
C.(H.)	neffi		C.neff.030	F	II	~13km S of Paposo	-25.1111	-70.4835	21	29	ix		4	x	2002	J Grixti & A Zayed		yellow pan			PCYU
C.(H.)	neffi		C.neff.031	F	II	~13km S of Paposo	-25.1111	-70.4835	21	28	ix		29	ix	2002	J Grixti & A Zayed		yellow pan			PCYU
C.(H.)	neffi		C.neff.032	F	II	~13km S of Paposo	-25.1111	-70.4835	21	29	ix		4	x	2002	J Grixti & A Zayed		yellow pan			PCYU
C.(H.)	neffi		C.neff.033	F	II	~13km S of Paposo	-25.1111	-70.4835	21	29	ix		4	x	2002	J Grixti & A Zayed		yellow pan			PCYU
C.(H.)	neffi		C.neff.034	F	II	~13km S of Paposo	-25.1111	-70.4835	21	29	ix		4	x	2002	J Grixti & A Zayed		yellow pan			PCYU
C.(H.)	neffi		C.neff.035	F	II	~13km S of Paposo	-25.1111	-70.4835	21	29	ix		4	x	2002	J Grixti & A Zayed		yellow pan			PCYU
C.(H.)	neffi		C.neff.036	F	II	~13km S of Paposo	-25.1111	-70.4835	21	29	ix		4	x	2002	J Grixti & A Zayed		yellow pan			PCYU
C.(H.)	neffi		C.neff.037	F	II	~13km S of Paposo	-25.1111	-70.4835	21	29	ix		4	x	2002	J Grixti & A Zayed		yellow pan			PCYU
C.(H.)	neffi		C.neff.038	F	II	~13km S of Paposo	-25.1111	-70.4835	21	28	ix		29	ix	2002	J Grixti & A Zayed		yellow pan			PCYU
C.(H.)	neffi		C.neff.039	F	II	~13km S of Paposo	-25.1111	-70.4835	21	28	ix		29	ix	2002	J Grixti & A Zayed		yellow pan			PCYU
C.(H.)	neffi		C.neff.040	F	II	~13km S of Paposo	-25.1111	-70.4835	21	28	ix		29	ix	2002	J Grixti & A Zayed		yellow pan			PCYU
C.(H.)	neffi		C.neff.041	F	II	~13km S of Paposo	-25.1111	-70.4835	21	29	ix		4	x	2002	J Grixti & A Zayed		yellow pan			PCYU
C.(H.)	neffi		C.neff.042	F	II	~13km S of Paposo	-25.1111	-70.4835	21	29	ix		4	x	2002	J Grixti & A Zayed		yellow pan			PCYU
C.(H.)	neffi		C.neff.043	F	II	~13km S of Paposo	-25.1111	-70.4835	21	29	ix		4	x	2002	J Grixti & A Zayed		yellow pan			PCYU
C.(H.)	neffi		C.neff.044	F	II	SE of Taltal, Ruta 1, km 11	-25.4963	-70.4213	499	27	ix		17	xi	2013	J. Postlethwaite & S. Monckton		yellow cup			PCYU
C.(H.)	neffi		C.neff.045	F	II	SE of Taltal, Ruta 1, km 11	-25.4936	-70.4213	499	27	ix		17	xi	2013	J. Postlethwaite & S. Monckton		blue cup			PCYU
C.(H.)	neffi		C.neff.046	M	II	Paposo	-25.0027	-70.4627	39	1	x				1983	R. Aldunate					PUCV
C.(H.)	neffi		C.neff.047	M	II	S of Paposo, Ruta 1, km 85.5	-25.1519	-70.4552	5	5	xi				2013	S. Monckton					PCYU
C.(H.)	neffi		C.neff.048	M	II	S of Paposo, Ruta 1, km 85.5	-25.1519	-70.4552	5	5	xi				2013	S. Monckton					PCYU
C.(H.)	neffi		C.neff.049	M	II	S of Paposo, Ruta 1, km 44	-25.2433	-70.4336	42	5	xi				2013	S. Monckton					PCYU
C.(H.)	neffi		C.neff.050	M	II	N of Taltal, Ruta 1, km 40	-25.2692	-70.4378	37	5	xi				2013	S. Monckton					PCYU
C.(H.)	neffi		C.neff.051	M	II	N of Taltal	-25.2314	-70.4367	20	20	xi				2002	J. Grixti & A. Zayed		white pan			PCYU
C.(H.)	neffi		C.neff.052	M	II	Paposo	-25.0027	-70.4627	39	1	x				1983	F. Rodriguez					BBSL
C.(H.)	neffi		C.neff.053	M	II	N of Taltal	-25.2314	-70.4367	20	20	xi				2002	J. Grixti & A. Zayed		yellow pan			PCYU
C.(H.)	neffi		C.neff.054	M	II	N of Taltal	-25.2314	-70.4367	20	20	xi				2002	J. Grixti & A. Zayed		white pan			PCYU
C.(H.)	neffi		C.neff.055	M	II	N of Taltal	-25.2314	-70.4367	20	20	xi				2002	J. Grixti & A. Zayed		yellow pan			PCYU
C.(H.)	neffi		C.neff.056	M	II	Beach 16 km N of Taltal	-25.2837	-70.4496	21	20	xi				2002	J. Grixti & A. Zayed		yellow pan			CTMI
C.(H.)	neffi		C.neff.057	M	II	S of Paposo, Ruta 1, km 85.5	-25.1519	-70.4552	5	5	xi				2013	S. Monckton					PCYU
C.(H.)	neffi		C.neff.058	F	II	S of Paposo, Ruta 1, km 85.5	-25.1519	-70.4552	5	5	xi				2013	S. Monckton					PCYU
C.(H.)	neffi		C.neff.059	F	II	S of Paposo, Ruta 1, km 85.5	-25.1519	-70.4552	5	5	xi				2013	S. Monckton					PCYU
C.(H.)	neffi		C.neff.060	F	II	13 km S of Paposo	-25.1612	-70.4423	36	28	ix				2002	J. Grixti & A. Zayed	Oxalis bulbocastanum				PCYU
C.(H.)	neffi		C.neff.061	F	II	S of Paposo, Ruta 1, km 85.5	-25.1519	-70.4552	5	5	xi				2013	S. Monckton					PCYU
C.(H.)	neffi		C.neff.062	F	II	S of Paposo, Ruta 1, km 44	-25.2433	-70.4336	42	5	xi				2013	S. Monckton					PCYU
C.(H.)	neffi		C.neff.063	F	II	N of Taltal, Ruta 1, km 40	-25.2692	-70.4378	37	5	xi				2013	S. Monckton					PCYU
C.(H.)	neffi		C.neff.064	F	II	N of Taltal, Ruta 1, km 40	-25.2692	-70.4378	37	5	xi				2013	S. Monckton					PCYU
C.(H.)	neffi		C.neff.065	F	II	S of Paposo, Ruta 1, km 85.5	-25.1519	-70.4552	5	5	xi				2013	S. Monckton					PCYU
C.(H.)	neffi		C.neff.066	F	II	S of Paposo, Ruta 1, km 85.5	-25.1519	-70.4552	5	5	xi				2013	S. Monckton					PCYU
C.(H.)	neffi		C.neff.067	F	II	13 km S of Paposo	-25.1111	-70.4835	21	29	ix		4	x	2002	J. Grixti & A. Zayed		yellow pan			PCYU
C.(H.)	neffi		C.neff.068	F	II	13 km S of Paposo	-25.1111	-70.4835	21	29	ix		4	x	2002	J. Grixti & A. Zayed		yellow pan			PCYU
C.(H.)	neffi		C.neff.069	F	II	13 km S of Paposo	-25.1111	-70.4835	21	29	ix		4	x	2002	J. Grixti & A. Zayed		yellow pan			PCYU
C.(H.)	neffi		C.neff.070	F	II	Paposo	-25.0027	-70.4627	39	1	x				1983	F. Rodriguez					BBSL
C.(H.)	neffi		C.neff.071	F	II	Paposo	-25.0027	-70.4627	39	1	x				1983	R. Aldunate					PUCV
C.(H.)	neffi		C.neff.072	F	II	Ruta 5, km 1006, Chañaral	-26.2495	-70.4805	606	19	xi				2002	J. Grixti & A. Zayed	Nolana				PCYU
C.(H.)	neffi		C.neff.073	F	II	13 km S of Paposo	-25.1612	-70.4423	36	28	ix				2002	J. Grixti & A. Zayed	Oxalis bulbocastanum				PCYU
C.(H.)	neffi		C.neff.074	F	II	N of Taltal	-25.2314	-70.4367	20	20	xi				2002	J. Grixti & A. Zayed		yellow pan			PCYU
C.(H.)	neffi		C.neff.075	F	II	N of Taltal	-25.2314	-70.4367	20	20	xi				2002	J. Grixti & A. Zayed		white pan			PCYU
C.(H.)	neffi		C.neff.076	F	II	N of Taltal	-25.2314	-70.4367	20	20	xi				2002	J. Grixti & A. Zayed		yellow pan			PCYU
C.(H.)	neffi		C.neff.077	F	II	N of Taltal	-25.2314	-70.4367	20	20	xi				2002	J. Grixti & A. Zayed		white pan			PCYU
C.(H.)	neffi		C.neff.078	F	II	N of Taltal	-25.2314	-70.4367	20	20	xi				2002	J. Grixti & A. Zayed		yellow pan			PCYU
C.(H.)	neffi		C.neff.079	F	II	N of Taltal	-25.2314	-70.4367	20	20	xi				2002	J. Grixti & A. Zayed		yellow pan			PCYU
C.(H.)	neffi		C.neff.080	F	II	N of Taltal	-25.2314	-70.4367	20	20	xi				2002	J. Grixti & A. Zayed		yellow pan			PCYU
C.(H.)	neffi		C.neff.081	F	II	N of Taltal	-25.2314	-70.4367	20	20	xi				2002	J. Grixti & A. Zayed		yellow pan			PCYU
C.(H.)	neffi		C.neff.082	F	II	N of Taltal	-25.2314	-70.4367	20	20	xi				2002	J. Grixti & A. Zayed		yellow pan			PCYU
C.(H.)	neffi		C.neff.083	F	II	N of Taltal	-25.2314	-70.4367	20	20	xi				2002	J. Grixti & A. Zayed		blue pan			PCYU
C.(H.)	neffi		C.neff.084	F	II	Beach 16 km N of Taltal	-25.2837	-70.4496	21	20	xi				2002	J. Grixti & A. Zayed		yellow pan			PCYU
C.(H.)	neffi		C.neff.085	F	II	N of Taltal	-25.2314	-70.4367	20	20	xi				2002	J. Grixti & A. Zayed		blue pan			PCYU
C.(H.)	neffi		C.neff.086	F	II	N of Taltal	-25.2314	-70.4367	20	20	xi				2002	J. Grixti & A. Zayed		yellow pan			PCYU
C.(H.)	neffi		C.neff.087	F	II	Beach 16 km N of Taltal	-25.2837	-70.4496	21	20	xi				2002	J. Grixti & A. Zayed		yellow pan			PCYU
C.(H.)	neffi		C.neff.088	F	II	Beach 16 km N of Taltal	-25.2837	-70.4496	21	20	xi				2002	J. Grixti & A. Zayed		yellow pan			CTMI
C.(H.)	neffi		C.neff.089	F	II	S of Taltal, Ruta 1 km 9.6	-25.5059	-70.4167	608	1	xii				2014	L. Packer					PCYU
C.(H.)	neffi		C.neff.090	F	II	S of Taltal, Ruta 1 km 9.6	-25.5059	-70.4167	608	1	xii				2014	L. Packer					PCYU
C.(H.)	neffi		C.neff.091	F	II	S of Taltal, Ruta 1 km 9.6	-25.5059	-70.4167	608	1	xii				2014	L. Packer					PCYU
C.(H.)	neffi		C.neff.092	F	II	S of Taltal, Ruta 1 km 9.6	-25.5059	-70.4167	608	1	xii				2014	L. Packer					PCYU
C.(H.)	neffi		C.neff.093	F	II	S of Taltal, Ruta 1 km 9.6	-25.5059	-70.4167	608	1	xii				2014	L. Packer					PCYU
C.(H.)	neffi		C.neff.094	M	II	S of Taltal, Ruta 1 km 9.6	-25.5059	-70.4167	608	1	xii				2014	L. Packer					PCYU
C.(H.)	neffi		C.neff.095	M	II	S of Taltal, Ruta 1 km 9.6	-25.5059	-70.4167	608	1	xii				2014	L. Packer					PCYU
C.(H.)	neffi		C.neff.096	M	II	N of Taltal, Ruta 1 km 32.1	-25.3425	-70.4445	17	2	xii				2014	L. Packer					PCYU
C.(H.)	neffi		C.neff.097	F	II	N of Taltal, Ruta 1 km 32.1	-25.3425	-70.4445	17	2	xii				2014	L. Packer					PCYU
C.(H.)	neffi		C.neff.098	F	II	N of Taltal, Ruta 1 km 32.1	-25.3425	-70.4445	17	2	xii				2014	L. Packer					PCYU
C.(H.)	neffi		C.neff.099	M	II	N of Taltal, Ruta 1 km 43.6	-25.2463	-70.4321	29	2	xii				2014	L. Packer					PCYU
C.(H.)	neffi		C.neff.100	M	II	N of Taltal, Ruta 1 km 43.6	-25.2463	-70.4321	29	2	xii				2014	L. Packer					PCYU
C.(H.)	neffi		C.neff.101	M	II	N of Taltal, Ruta 1 km 43.6	-25.2463	-70.4321	29	2	xii				2014	L. Packer					PCYU
C.(H.)	neffi		C.neff.102	M	II	N of Taltal, Ruta 1 km 43.6	-25.2463	-70.4321	29	2	xii				2014	L. Packer					PCYU
C.(H.)	neffi		C.neff.103	M	II	N of Taltal, Ruta 1 km 43.6	-25.2463	-70.4321	29	2	xii				2014	L. Packer					PCYU
C.(H.)	neffi		C.neff.104	M	II	N of Taltal, Ruta 1 km 43.6	-25.2463	-70.4321	29	2	xii				2014	L. Packer					PCYU
C.(H.)	neffi		C.neff.105	M	II	N of Taltal, Ruta 1 km 43.6	-25.2463	-70.4321	29	2	xii				2014	L. Packer					PCYU
C.(H.)	neffi		C.neff.106	M	II	N of Taltal, Ruta 1 km 43.6	-25.2463	-70.4321	29	2	xii				2014	L. Packer					PCYU
C.(H.)	neffi		C.neff.107	F	II	N of Taltal, Ruta 1 km 43.6	-25.2463	-70.4321	29	2	xii				2014	L. Packer					PCYU
C.(H.)	neffi		C.neff.108	F	II	N of Taltal, Ruta 1 km 43.6	-25.2463	-70.4321	29	2	xii				2014	L. Packer					PCYU
C.(H.)	neffi		C.neff.109	F	II	N of Taltal, Ruta 1 km 43.6	-25.2463	-70.4321	29	2	xii				2014	L. Packer					PCYU
C.(H.)	neffi		C.neff.110	F	II	N of Taltal, Ruta 1 km 43.6	-25.2463	-70.4321	29	2	xii				2014	L. Packer					PCYU
C.(H.)	neffi		C.neff.111	F	II	N of Taltal, Ruta 1 km 43.6	-25.2463	-70.4321	29	2	xii				2014	L. Packer					PCYU
C.(H.)	neffi		C.neff.112	F	II	N of Taltal, Ruta 1 km 43.6	-25.2463	-70.4321	29	2	xii				2014	L. Packer					PCYU
C.(H.)	neffi		C.neff.113	F	II	N of Taltal, Ruta 1 km 43.6	-25.2463	-70.4321	29	2	xii				2014	L. Packer					PCYU
C.(H.)	neffi		C.neff.114	F	II	N of Taltal, Ruta 1 km 43.6	-25.2463	-70.4321	29	2	xii				2014	L. Packer					PCYU
C.(H.)	neffi		C.neff.115	F	II	N of Taltal, Ruta 1 km 43.6	-25.2463	-70.4321	29	2	xii				2014	L. Packer					PCYU
C.(H.)	neffi		C.neff.116	F	II	N of Taltal, Ruta 1 km 43.6	-25.2463	-70.4321	29	2	xii				2014	L. Packer					PCYU
C.(H.)	neffi		C.neff.117	F	II	N of Taltal, Ruta 1 km 43.6	-25.2463	-70.4321	29	2	xii				2014	L. Packer					PCYU
C.(H.)	neffi		C.neff.118	F	II	N of Taltal, Ruta 1 km 43.6	-25.2463	-70.4321	29	2	xii				2014	L. Packer					PCYU
C.(H.)	neffi		C.neff.119	F	II	N of Taltal, Ruta 1 km 43.6	-25.2463	-70.4321	29	2	xii				2014	L. Packer					PCYU
C.(H.)	neffi		C.neff.120	F	II	N of Taltal, Ruta 1 km 43.6	-25.2463	-70.4321	29	2	xii				2014	L. Packer					PCYU
C.(H.)	neffi		C.neff.121	F	II	N of Taltal, Ruta 1 km 43.6	-25.2463	-70.4321	29	2	xii				2014	L. Packer					PCYU
C.(H.)	neffi		C.neff.122	F	II	N of Taltal, Ruta 1 km 43.6	-25.2463	-70.4321	29	2	xii				2014	L. Packer					PCYU
C.(H.)	neffi		C.neff.123	F	II	N of Taltal, Ruta 1 km 43.6	-25.2463	-70.4321	29	2	xii				2014	L. Packer					PCYU
C.(H.)	neffi		C.neff.124	F	II	N of Taltal, Ruta 1 km 43.6	-25.2463	-70.4321	29	2	xii				2014	L. Packer					PCYU
C.(H.)	neffi		C.neff.125	F	II	N of Taltal, Ruta 1 km 43.6	-25.2463	-70.4321	29	2	xii				2014	L. Packer					PCYU
C.(H.)	neffi		C.neff.126	F	II	N of Taltal, Ruta 1 km 43.6	-25.2463	-70.4321	29	2	xii				2014	L. Packer					PCYU
C.(H.)	neffi		C.neff.127	F	II	N of Taltal, Ruta 1 km 43.6	-25.2463	-70.4321	29	2	xii				2014	L. Packer					PCYU
C.(H.)	neffi		C.neff.128	F	II	N of Taltal, Ruta 1 km 43.6	-25.2463	-70.4321	29	2	xii				2014	L. Packer					PCYU
C.(H.)	neffi		C.neff.129	F	II	N of Taltal, Ruta 1 km 43.6	-25.2463	-70.4321	29	2	xii				2014	L. Packer					PCYU
C.(H.)	neffi		C.neff.130	M	II	29 km N of Paposo	-24.783	-70.5402	59	29	x				2014	J. Postlethwaite		pan trap			PCYU
C.(H.)	neffi		C.neff.131	M	II	29 km N of Paposo	-24.783	-70.5402	59	29	x				2014	J. Postlethwaite		pan trap			PCYU
C.(H.)	neffi		C.neff.132	F	II	29 km N of Paposo	-24.783	-70.5402	59	29	x				2014	J. Postlethwaite		pan trap			PCYU
C.(H.)	neffi		C.neff.133	M	II	29 km N of Paposo	-24.783	-70.5402	59	29	x				2014	J. Postlethwaite		vane trap			PCYU
C.(H.)	neffi		C.neff.167	M	II	SE of Taltal, B-902 km 1	-25.5023	-70.4121	564	2	xii				2014	L. Packer					PCYU
C.(H.)	neffi		C.neff.168	M	II	SE of Taltal, B-902 km 1	-25.5023	-70.4121	564	2	xii				2014	L. Packer					PCYU
C.(H.)	neffi		C.neff.169	F	II	SE of Taltal, B-902 km 1	-25.5023	-70.4121	564	2	xii				2014	L. Packer					PCYU
C.(H.)	packeri	HOLOTYPE	C.pckr.001	M	III	N of Vallenar	-28.4141	-70.7213	658	15	ix		17		2010	L. Packer		pan trap			PCYU
C.(H.)	packeri	ALLOTYPE	C.pckr.002	F	III	E of Llanos de Challe	-28.15	-70.961	189	14	x				2013	S. Monckton				PCYU 0020860	PCYU
C.(H.)	packeri	PARATYPE	C.pckr.003	M	III	N of Vallenar	-28.4141	-70.7213	658	11	x		12		2000	L. Packer					PCYU
C.(H.)	packeri	PARATYPE	C.pckr.004	M	III	N of Vallenar	-28.4141	-70.7213	658	11	x		12		2000	L. Packer					PCYU
C.(H.)	packeri	PARATYPE	C.pckr.005	M	III	N of Vallenar	-28.4141	-70.7213	658	11	x		12		2000	L. Packer					PCYU
C.(H.)	packeri	PARATYPE	C.pckr.006	M	III	N of Vallenar	-28.4141	-70.7213	658	11	x		12		2000	L. Packer					PCYU
C.(H.)	packeri	PARATYPE	C.pckr.007	M	III	N of Vallenar	-28.4141	-70.7213	658	11	x		12		2000	L. Packer					PCYU
C.(H.)	packeri	PARATYPE	C.pckr.008	M	III	N of Vallenar	-28.4141	-70.7213	658	11	x		12		2000	L. Packer					PCYU
C.(H.)	packeri	PARATYPE	C.pckr.009	M	III	Ruta 5, Km 773	-27.6421	-70.4634	600	25	x				1995	L. Ruz					PUCV
C.(H.)	packeri	PARATYPE	C.pckr.010	M	III	Panamericana km 683, N of Vallenar	-28.395	-70.7168	632	17	x				2000	L. Packer					PCYU
C.(H.)	packeri	PARATYPE	C.pckr.011	M	III	Huasco Prov. 10 km N of Vallenar	-28.4861	-70.7314	610	28	x				2000	J.G. Rozen					AMNH
C.(H.)	packeri	PARATYPE	C.pckr.012	M	III	Huasco Prov. 10 km N of Vallenar	-28.4861	-70.7314	610	28	x				2000	J.G. Rozen					AMNH
C.(H.)	packeri	PARATYPE	C.pckr.013	M	III	E of Llanos de Challe	-28.15	-70.961	189	14	x				2013	S. Monckton				PCYU 0020858	PCYU	dissected abdomen & hindleg
C.(H.)	packeri	PARATYPE	C.pckr.014	M	III	E of Llanos de Challe	-28.15	-70.961	189	14	x				2013	S. Monckton				PCYU 0020859	PCYU	1
C.(H.)	packeri	PARATYPE	C.pckr.015	M	III	E of Llanos de Challe	-28.15	-70.961	189	14	x				2013	S. Monckton			CCDB-19989 A03	PCYU 0021665	PCYU	2
C.(H.)	packeri	PARATYPE	C.pckr.016	M	III	N of Huasco, km 72	-27.8895	-71.0824	216	7	xi				2013	S. Monckton					PCYU
C.(H.)	packeri	PARATYPE	C.pckr.017	M	III	N of Huasco, km 72	-27.8895	-71.0824	216	7	xi				2013	S. Monckton					PCYU
C.(H.)	packeri	PARATYPE	C.pckr.018	M	III	N of Huasco, km 72	-27.8895	-71.0824	216	7	xi				2013	S. Monckton					PCYU
C.(H.)	packeri	PARATYPE	C.pckr.019	M	III	N of Huasco, km 72	-27.8895	-71.0824	216	7	xi				2013	S. Monckton					PCYU
C.(H.)	packeri	PARATYPE	C.pckr.020	M	III	N of Huasco, km 72	-27.8895	-71.0824	216	7	xi				2013	S. Monckton					PCYU
C.(H.)	packeri	PARATYPE	C.pckr.021	M	III	N of Huasco, km 72	-27.8895	-71.0824	216	7	xi				2013	S. Monckton					BBSL
C.(H.)	packeri	PARATYPE	C.pckr.022	M	III	N of Huasco, km 72	-27.8895	-71.0824	216	7	xi				2013	S. Monckton					CTMI
C.(H.)	packeri	PARATYPE	C.pckr.023	M	III	N of Huasco, km 67.2	-27.9272	-71.0851	169	7	xi				2013	S. Monckton					PCYU
C.(H.)	packeri	PARATYPE	C.pckr.024	M	III	N of Huasco, km 67.2	-27.9272	-71.0851	169	7	xi				2013	S. Monckton					PCYU
C.(H.)	packeri	PARATYPE	C.pckr.025	M	III	N of Huasco, km 67.2	-27.9272	-71.0851	169	7	xi				2013	S. Monckton					PCYU
C.(H.)	packeri	PARATYPE	C.pckr.026	M	III	N of Huasco, km 52	-28.0438	-71.1287	65	7	xi				2013	S. Monckton					PCYU
C.(H.)	packeri	PARATYPE	C.pckr.027	M	III	N of Huasco, km 52	-28.0438	-71.1287	65	7	xi				2013	S. Monckton					PCYU
C.(H.)	packeri	PARATYPE	C.pckr.028	M	III	N of Huasco, km 39	-28.1472	-71.1562	55	7	xi				2013	S. Monckton					PCYU
C.(H.)	packeri	PARATYPE	C.pckr.029	M	III	N of Huasco, km 39	-28.1472	-71.1562	55	7	xi				2013	S. Monckton					PCYU
C.(H.)	packeri	PARATYPE	C.pckr.030	M	III	N of Huasco, km 11	-28.3816	-71.1625	86	7	xi				2013	S. Monckton					PCYU
C.(H.)	packeri	PARATYPE	C.pckr.031	M	III	Travesía	-27.5399	-70.443	713	29	ix				1983	O. Martinez					PUCV
C.(H.)	packeri	PARATYPE	C.pckr.032	M	III	Travesía	-27.5399	-70.443	713	9	x				1972	H. Toro					AMNH
C.(H.)	packeri	PARATYPE	C.pckr.034	M	III	Castilla	-27.9032	-70.6793	278	18	ix				1986	L. Ruz					PUCV
C.(H.)	packeri	PARATYPE	C.pckr.035	M	III	C-451, 2.3 km E of Ruta 5	-28.0188	-70.5538	488	22	x		25		2010	L. Packer		pan trap			PCYU
C.(H.)	packeri	PARATYPE	C.pckr.036	M	III	C-451, 2.3 km E of Ruta 5	-28.0188	-70.5538	488	22	x		25		2010	L. Packer		pan trap			PCYU
C.(H.)	packeri	PARATYPE	C.pckr.037	M	III	C-451, 2.3 km E of Ruta 5	-28.0188	-70.5538	488	22	x		25		2010	L. Packer		pan trap			PCYU
C.(H.)	packeri	PARATYPE	C.pckr.038	M	III	Canto Agua	-28.15	-70.9333	247	9	x				1977	H. Toro					PUCV
C.(H.)	packeri	PARATYPE	C.pckr.039	M	III	Canto Agua	-28.15	-70.9333	247	9	x				1977	J. Magunacelaya					PUCV
C.(H.)	packeri	PARATYPE	C.pckr.040	M	III	W of Domeyko	-28.9772	-71.0006	610	5	x				2010	L. Packer & G.S. Fraser				PCYU 0004777	PCYU
C.(H.)	packeri	PARATYPE	C.pckr.041	M	III	S of Cachiyuyo	-29.1475	-70.9419	1247	9	x				2010	L. Packer & G.S. Fraser				PCYU 0004713	PCYU
C.(H.)	packeri	PARATYPE	C.pckr.042	M	III	S of Cachiyuyo	-29.1475	-70.9419	1247	9	x				2010	L. Packer & G.S. Fraser				PCYU 0004711	PCYU
C.(H.)	packeri	PARATYPE	C.pckr.043	M	III	S of Cachiyuyo	-29.1475	-70.9419	1247	9	x				2010	L. Packer & G.S. Fraser				PCYU 0004708	PCYU
C.(H.)	packeri	PARATYPE	C.pckr.044	M	III	S of Cachiyuyo	-29.1475	-70.9419	1247	9	x				2010	L. Packer & G.S. Fraser				PCYU 0004712	PCYU
C.(H.)	packeri	PARATYPE	C.pckr.045	F	III	E of Llanos de Challe	-28.15	-70.961	189	14	x				2013	S. Monckton				PCYU 0020864	PCYU	3
C.(H.)	packeri	PARATYPE	C.pckr.046	F	III	E of Llanos de Challe	-28.15	-70.961	189	14	x				2013	S. Monckton				PCYU 0020865	PUCV	4
C.(H.)	packeri	PARATYPE	C.pckr.047	F	III	E of Llanos de Challe	-28.15	-70.961	189	14	x				2013	S. Monckton				PCYU 0020861	PUCV	5
C.(H.)	packeri	PARATYPE	C.pckr.048	F	III	E of Llanos de Challe	-28.15	-70.961	189	14	x				2013	S. Monckton			CCDB-19989 A04	PCYU 0021666	PCYU	6
C.(H.)	packeri	PARATYPE	C.pckr.049	F	III	E of Llanos de Challe	-28.15	-70.961	189	14	x				2013	S. Monckton				PCYU 0020862	PCYU	7
C.(H.)	packeri	PARATYPE	C.pckr.050	F	III	E of Llanos de Challe	-28.15	-70.961	189	14	x				2013	S. Monckton				PCYU 0020863	PCYU	8
C.(H.)	packeri	PARATYPE	C.pckr.051	F	III	E of Llanos de Challe	-28.15	-70.961	189	14	x				2013	S. Monckton				PCYU 0020867	AMNH	14
C.(H.)	packeri	PARATYPE	C.pckr.052	F	III	Parque Nacional Llanos de Challe	-28.1964	-71.044	230	22	x				2000	L. Packer					PCYU	15
C.(H.)	packeri	PARATYPE	C.pckr.053	F	III	Parque Nacional Llanos de Challe	-28.1964	-71.044	230	22	x				2000	L. Packer					PCYU	16
C.(H.)	packeri	PARATYPE	C.pckr.054	F	III	Parque Nacional Llanos de Challe	-28.1964	-71.044	230	22	x				2000	L. Packer					PCYU	17
C.(H.)	packeri	PARATYPE	C.pckr.055	F	III	Parque Nacional Llanos de Challe	-28.1964	-71.044	230	22	x				2000	L. Packer					PCYU	18
C.(H.)	packeri	PARATYPE	C.pckr.056	F	III	N of Huasco km 39	-28.1472	-71.1562	37	7	xi				2013	S. Monckton				PCYU 0021593	AMNH	10
C.(H.)	packeri	PARATYPE	C.pckr.057	F	III	N of Huasco km 39	-28.1472	-71.1562	37	7	xi				2013	S. Monckton			CCDB-19989 A06	PCYU 0021668	PCYU	11
C.(H.)	packeri	PARATYPE	C.pckr.058	F	III	N of Huasco km 39	-28.1472	-71.1562	37	7	xi				2013	S. Monckton				PCYU 0021594	PCYU	12
C.(H.)	packeri	PARATYPE	C.pckr.059	F	III	Emb. Sta Juana, C-149 km 21.5	-28.6747	-70.6432	645	15	x				2013	S. Monckton			CCDB-19989 A07	PCYU 0021669	PCYU	13
C.(H.)	packeri	PARATYPE	C.pckr.060	F	III	Ruta 5, 768.8km	-27.6728	-70.4746	653	1	x				2013	S. Monckton			CCDB-22788 F01		PCYU	19
C.(H.)	packeri	PARATYPE	C.pckr.061	F	III	Rd to Nantoco km 3	-27.6161	-70.4279	678	6	xi				2013	S. Monckton			CCDB-19989 A05	PCYU 0021667	PCYU	9
C.(H.)	packeri	PARATYPE	C.pckr.062	F	III	Quebrada del Potrero	-26.8569	-70.6639	348	14	x				2010	L. Packer & E. Almeida				PCYU 0004790	PCYU	20
C.(H.)	packeri	PARATYPE	C.pckr.063	F	III	N of Huasco, km 72	-27.8895	-71.0824	216	7	xi				2013	S. Monckton					PCYU
C.(H.)	packeri	PARATYPE	C.pckr.064	F	III	6 km N of Huasco	-28.4361	-71.1846	87	14	x				2013	S. Monckton					PCYU
C.(H.)	packeri	PARATYPE	C.pckr.065	F	III	N of Huasco, km 72	-27.8895	-71.0824	216	7	xi				2013	S. Monckton					PCYU
C.(H.)	packeri	PARATYPE	C.pckr.066	F	III	N of Huasco, km 52	-28.0438	-71.1287	65	7	xi				2013	S. Monckton					PCYU
C.(H.)	packeri	PARATYPE	C.pckr.067	F	III	Embalse Santa Juana, C-479, km 21.5	-28.6747	-70.6432	645	15	x				2013	S. Monckton				PCYU 0020912	PCYU
C.(H.)	packeri	PARATYPE	C.pckr.068	F	III	Cta. Chañaral de Aceituno	-29.0789	-71.4875	12	11	x				1981	O. Martinez					PUCV
C.(H.)	packeri	PARATYPE	C.pckr.069	F	III	N of Huasco, km 52	-28.0438	-71.1287	65	7	xi				2013	S. Monckton					PCYU
C.(H.)	packeri	PARATYPE	C.pckr.070	F	III	N of Huasco, km 11	-28.3816	-71.1625	86	7	xi				2013	S. Monckton					PCYU
C.(H.)	packeri	PARATYPE	C.pckr.071	F	III	N of Vallenar, FIT Southern	-28.4141	-70.7213	658		x				2000	L. Packer					PCYU
C.(H.)	packeri	PARATYPE	C.pckr.072	F	III	N of Huasco, km 72	-27.8895	-71.0824	216	7	xi				2013	S. Monckton					PCYU
C.(H.)	packeri	PARATYPE	C.pckr.073	F	III	N of Huasco, km 39	-28.1472	-71.1562	55	7	xi				2013	S. Monckton					PCYU
C.(H.)	packeri	PARATYPE	C.pckr.074	F	III	N of Huasco, km 72	-27.8895	-71.0824	216	7	xi				2013	S. Monckton					PCYU
C.(H.)	packeri	PARATYPE	C.pckr.075	F	III	N of Huasco, km 72	-27.8895	-71.0824	216	7	xi				2013	S. Monckton					PCYU
C.(H.)	packeri	PARATYPE	C.pckr.076	F	III	N of Huasco, km 72	-27.8895	-71.0824	216	7	xi				2013	S. Monckton					PCYU
C.(H.)	packeri	PARATYPE	C.pckr.077	F	III	N of Huasco, km 72	-27.8895	-71.0824	216	7	xi				2013	S. Monckton					PCYU
C.(H.)	packeri	PARATYPE	C.pckr.078	F	III	N of Huasco, km 72	-27.8895	-71.0824	216	7	xi				2013	S. Monckton					PCYU
C.(H.)	packeri	PARATYPE	C.pckr.079	F	III	N of Huasco, km 72	-27.8895	-71.0824	216	7	xi				2013	S. Monckton					PCYU
C.(H.)	packeri	PARATYPE	C.pckr.080	F	III	N of Huasco, km 72	-27.8895	-71.0824	216	7	xi				2013	S. Monckton					PCYU
C.(H.)	packeri	PARATYPE	C.pckr.081	F	III	N of Huasco, km 72	-27.8895	-71.0824	216	7	xi				2013	S. Monckton					PCYU
C.(H.)	packeri	PARATYPE	C.pckr.082	F	III	N of Huasco, km 72	-27.8895	-71.0824	216	7	xi				2013	S. Monckton					BBSL
C.(H.)	packeri	PARATYPE	C.pckr.083	F	III	N of Huasco, km 72	-27.8895	-71.0824	216	7	xi				2013	S. Monckton					CTMI
C.(H.)	packeri	PARATYPE	C.pckr.084	F	III	N of Huasco, km 67.2	-27.9272	-71.0851	169	7	xi				2013	S. Monckton					PCYU
C.(H.)	packeri	PARATYPE	C.pckr.085	F	III	N of Huasco, km 67.2	-27.9272	-71.0851	169	7	xi				2013	S. Monckton					PCYU
C.(H.)	packeri	PARATYPE	C.pckr.086	F	III	N of Huasco, km 67.2	-27.9272	-71.0851	169	7	xi				2013	S. Monckton					PCYU
C.(H.)	packeri	PARATYPE	C.pckr.087	F	III	Caleta Totoral	-27.8316	-71.0841	14	7	xi				2013	S. Monckton					PCYU
C.(H.)	packeri	PARATYPE	C.pckr.088	F	III	N of Huasco, km 52	-28.0438	-71.1287	65	7	xi				2013	S. Monckton					PCYU
C.(H.)	packeri	PARATYPE	C.pckr.089	F	III	N of Huasco, km 52	-28.0438	-71.1287	65	7	xi				2013	S. Monckton					PCYU
C.(H.)	packeri	PARATYPE	C.pckr.090	F	III	N of Huasco, km 52	-28.0438	-71.1287	65	7	xi				2013	S. Monckton					PCYU
C.(H.)	packeri	PARATYPE	C.pckr.091	F	III	N of Huasco, km 52	-28.0438	-71.1287	65	7	xi				2013	S. Monckton					PCYU
C.(H.)	packeri	PARATYPE	C.pckr.092	F	III	>2km W of Domeyko	-28.9648	-70.9158	764	15	x				2013	S. Monckton					PCYU
C.(H.)	packeri	PARATYPE	C.pckr.093	F	III	N of Huasco, km 39	-28.1472	-71.1562	55	7	xi				2013	S. Monckton					PCYU
C.(H.)	packeri	PARATYPE	C.pckr.094	F	III	N of Huasco, km 39	-28.1472	-71.1562	55	7	xi				2013	S. Monckton					PCYU
C.(H.)	packeri	PARATYPE	C.pckr.095	F	III	N of Huasco, km 39	-28.1472	-71.1562	55	7	xi				2013	S. Monckton					PCYU
C.(H.)	packeri	PARATYPE	C.pckr.096	F	III	N of Huasco, km 39	-28.1472	-71.1562	55	7	xi				2013	S. Monckton					PCYU
C.(H.)	packeri	PARATYPE	C.pckr.097	F	III	N of Huasco, km 39	-28.1472	-71.1562	55	7	xi				2013	S. Monckton					PCYU
C.(H.)	packeri	PARATYPE	C.pckr.098	F	III	N of Huasco, km 39	-28.1472	-71.1562	55	7	xi				2013	S. Monckton					PCYU
C.(H.)	packeri	PARATYPE	C.pckr.099	F	III	N of Huasco, km 39	-28.1472	-71.1562	55	7	xi				2013	S. Monckton					PCYU
C.(H.)	packeri	PARATYPE	C.pckr.100	F	III	N of Huasco, km 39	-28.1472	-71.1562	55	7	xi				2013	S. Monckton					PCYU
C.(H.)	packeri	PARATYPE	C.pckr.101	F	III	N of Huasco, km 39	-28.1472	-71.1562	55	7	xi				2013	S. Monckton					PCYU
C.(H.)	packeri	PARATYPE	C.pckr.102	F	III	N of Huasco, km 39	-28.1472	-71.1562	55	7	xi				2013	S. Monckton					PCYU
C.(H.)	packeri	PARATYPE	C.pckr.103	F	III	N of Huasco, km 39	-28.1472	-71.1562	55	7	xi				2013	S. Monckton					PCYU
C.(H.)	packeri	PARATYPE	C.pckr.104	F	III	N of Huasco, km 11	-28.3816	-71.1625	86	7	xi				2013	S. Monckton					PCYU
C.(H.)	packeri	PARATYPE	C.pckr.105	F	III	N of Huasco, km 43	-28.1131	-71.1542	55	7	xi				2013	S. Monckton					PCYU
C.(H.)	packeri	PARATYPE	C.pckr.106	F	III	N of Huasco, km 18	-28.3248	-71.1528	62	7	xi				2013	S. Monckton					PCYU
C.(H.)	packeri	PARATYPE	C.pckr.107	F	III	Cta. Chañaral de Aceituno	-29.0789	-71.4875	12	11	x				1981	J. Magunacelaya					PUCV
C.(H.)	packeri	PARATYPE	C.pckr.108	F	III	10 km N of Vallenar	-28.4875	-70.7327	579	18	x				2000	L. Packer					PCYU
C.(H.)	packeri	PARATYPE	C.pckr.109	F	III	13.5 km W of Los Sapos	-28.0188	-70.5538	488	8	x				2010	L. Packer & G.S. Fraser				PCYU 0004748	PCYU
C.(H.)	packeri	PARATYPE	C.pckr.110	F	III	Embalse Santa Juana, C-479, km 21.5	-28.6747	-70.6432	645	15	x				2013	S. Monckton				PCYU 0020911	PCYU
C.(H.)	packeri	PARATYPE	C.pckr.111	F	III	Embalse Santa Juana, C-479, km 21.5	-28.6747	-70.6432	645	15	x				2013	S. Monckton				PCYU 0020913	PCYU
C.(H.)	packeri	PARATYPE	C.pckr.112	F	III	Embalse Santa Juana, C-479, km 21.5	-28.6747	-70.6432	645	15	x				2013	S. Monckton				PCYU 0020914	PCYU
C.(H.)	packeri	PARATYPE	C.pckr.113	F	III	Tres Playitas, 10 km N of Huasco Bajo	-28.3814	-71.1769	22	13	x				2001	L. Packer					PCYU
C.(H.)	packeri	PARATYPE	C.pckr.114	F	III	S of Cachiyuyo	-29.1475	-70.9419	1247	9	x				2010	L. Packer & G.S. Fraser				PCYU 0004714	PCYU
C.(H.)	packeri	PARATYPE	C.pckr.115	F	III	S of Cachiyuyo	-29.1475	-70.9419	1247	9	x				2010	L. Packer & G.S. Fraser				PCYU 0004710	PCYU
C.(H.)	packeri	PARATYPE	C.pckr.116	F	III	N of Vallenar, FIT Southern	-28.4141	-70.7213	658		x				2000	L. Packer					PCYU
C.(H.)	packeri	PARATYPE	C.pckr.117	F	III	N of Vallenar, FIT Southern	-28.4141	-70.7213	658		x				2000	L. Packer					PCYU
C.(H.)	packeri	PARATYPE	C.pckr.118	F	III	N of Vallenar, FIT Southern	-28.4141	-70.7213	658		x				2000	L. Packer					PCYU
C.(H.)	packeri	PARATYPE	C.pckr.119	F	III	N of Vallenar, FIT Southern	-28.4141	-70.7213	658		x				2000	L. Packer					PCYU
C.(H.)	packeri	PARATYPE	C.pckr.120	F	III	N of Vallenar, FIT Southern	-28.4141	-70.7213	658		x				2000	L. Packer					PCYU
C.(H.)	packeri	PARATYPE	C.pckr.121	F	III	N of Vallenar, FIT Southern	-28.4141	-70.7213	658		x				2000	L. Packer					PCYU
C.(H.)	packeri	PARATYPE	C.pckr.122	F	III	N of Vallenar, FIT Southern	-28.4141	-70.7213	658		x				2000	L. Packer					PCYU
C.(H.)	packeri	PARATYPE	C.pckr.123	F	III	N of Vallenar, FIT Southern	-28.4141	-70.7213	658		x				2000	L. Packer					PCYU
C.(H.)	packeri	PARATYPE	C.pckr.124	F	III	N of Vallenar, FIT Southern	-28.4141	-70.7213	658		x				2000	L. Packer					PCYU
C.(H.)	packeri	PARATYPE	C.pckr.125	F	III	Huasco Prov. 10 km N of Vallenar	-28.4861	-70.7314	610	28	x				2000	J.G. Rozen					AMNH
C.(H.)	packeri		C.pckr.126	F	IV	Fray Jorge	-30.6624	-71.6827	580	22	x				1977	H. Toro					AMNH
C.(H.)	packeri	PARATYPE	C.pckr.127	F	III	Ruta 5, Km 773	-27.6421	-70.4634	600	25	x				1995	L. Ruz					PUCV
C.(H.)	packeri	PARATYPE	C.pckr.128	F	III	Ruta 5, Km 773	-27.6421	-70.4634	600	25	x				1995	L. Ruz					PUCV
C.(H.)	packeri	PARATYPE	C.pckr.129	F	III	C-451, 2.3 km E of Ruta 5	-28.0188	-70.5538	488	22	x		25		2010	L. Packer		pan trap			PCYU
C.(H.)	packeri	PARATYPE	C.pckr.130	F	III	C-451, 2.3 km E of Ruta 5	-28.0188	-70.5538	488	22	x		25		2010	L. Packer		pan trap			PCYU
C.(H.)	packeri	PARATYPE	C.pckr.131	F	III	C-451, 2.3 km E of Ruta 5	-28.0188	-70.5538	488	22	x		25		2010	L. Packer		pan trap			PCYU
C.(H.)	packeri	PARATYPE	C.pckr.132	F	III	C-451, 2.3 km E of Ruta 5	-28.0188	-70.5538	488	22	x		25		2010	L. Packer		pan trap			PCYU
C.(H.)	packeri	PARATYPE	C.pckr.133	F	III	C-451, 2.3 km E of Ruta 5	-28.0188	-70.5538	488	22	x		25		2010	L. Packer		pan trap			PCYU
C.(H.)	packeri	PARATYPE	C.pckr.134	F	III	C-451, 2.3 km E of Ruta 5	-28.0188	-70.5538	488	22	x		25		2010	L. Packer		pan trap			PCYU
C.(H.)	packeri	PARATYPE	C.pckr.135	F	III	C-451, 2.3 km E of Ruta 5	-28.0188	-70.5538	488	22	x		25		2010	L. Packer		pan trap			PCYU
C.(H.)	packeri	PARATYPE	C.pckr.136	F	III	C-451, 2.3 km E of Ruta 5	-28.0188	-70.5538	488	22	x		25		2010	L. Packer		pan trap			PCYU
C.(H.)	packeri	PARATYPE	C.pckr.137	F	III	C-451, 2.3 km E of Ruta 5	-28.0188	-70.5538	488	22	x		25		2010	L. Packer		pan trap			PCYU
C.(H.)	packeri	PARATYPE	C.pckr.138	F	III	C-451, 2.3 km E of Ruta 5	-28.0188	-70.5538	488	22	x		25		2010	L. Packer		pan trap			PCYU
C.(H.)	packeri	PARATYPE	C.pckr.139	F	III	C-451, 2.3 km E of Ruta 5	-28.0188	-70.5538	488	22	x		25		2010	L. Packer		pan trap			PCYU
C.(H.)	packeri	PARATYPE	C.pckr.140	F	III	N of Huasco, km 72	-27.8895	-71.0824	216	7	xi				2013	S. Monckton					PCYU
C.(H.)	randolphi	HOLOTYPE	C.rndi.001	M	VII	Laguna del Maule	-36.0027	-70.4555	2227	4	i				2009	L. Packer	Phacelia		CCDB-03755 D08	PCYU CHI09-6-5-004	PCYU
C.(H.)	randolphi	ALLOTYPE	C.rndi.002	F	VII	Laguna del Maule	-36.0027	-70.4555	2227	4	i				2009	L. Packer	Phacelia			PCYU CHI09-6-5-007	PCYU
C.(H.)	randolphi	PARATYPE	C.rndi.003	M	VII	Laguna del Maule	-36.0027	-70.4555	2227	4	i				2009	L. Packer	Phacelia			PCYU CHI09-6-5-008	PCYU	dissected terminalia & hindleg
C.(H.)	randolphi	PARATYPE	C.rndi.004	M	VII	E of Laguna del Maule, 160.120km	-35.9928	-70.3991	2505	1	i		6		2013	L. Packer & R. Smith		white pan trap	CCDB-19991 D05		PCYU
C.(H.)	randolphi	PARATYPE	C.rndi.005	M	VIII	Las Cabras, mts. in Chillan area, S Chillan Volcano, Ñuble Prov.	-36.9178	-71.4292	1500	6	i		31		1963	L.E. Peña					AMNH
C.(H.)	randolphi	PARATYPE	C.rndi.006	M	VIII	Ñuble, Los Lleuques, 4km. E of Recinto	-36.854	-71.6446	783		xii				1982	L. Peña					AMNH
C.(H.)	randolphi	PARATYPE	C.rndi.007	M	VIII	Ñuble, Los Lleuques, 4km. E of Recinto	-36.854	-71.6446	783		xii				1982	L. Peña					AMNH
C.(H.)	randolphi	PARATYPE	C.rndi.008	F	VII	Laguna del Maule	-36.0027	-70.4555	2227	4	i				2009	L. Packer	Phacelia			PCYU CHI09-6-5-001	PCYU
C.(H.)	randolphi	PARATYPE	C.rndi.009	F	VII	Laguna del Maule	-36.0027	-70.4555	2227	4	i				2009	L. Packer	Phacelia			PCYU CHI09-6-5-002	PCYU
C.(H.)	randolphi	PARATYPE	C.rndi.010	F	VII	Laguna del Maule	-36.0027	-70.4555	2227	4	i				2009	L. Packer	Phacelia			PCYU CHI09-6-6-001	PCYU
C.(H.)	randolphi	PARATYPE	C.rndi.011	F	VII	Laguna del Maule	-36.0027	-70.4555	2227	4	i				2009	L. Packer	Phacelia			PCYU CHI09-6-5-005	PCYU
C.(H.)	randolphi	PARATYPE	C.rndi.012	F	VII	Laguna del Maule	-36.0027	-70.4555	2227	4	i				2009	L. Packer	Phacelia			PCYU CHI09-6-5-009	PUCV
C.(H.)	randolphi	PARATYPE	C.rndi.013	F	VII	Laguna del Maule	-36.0027	-70.4555	2227	4	i				2009	L. Packer	Phacelia			PCYU CHI09-6-6-002	PUCV
C.(H.)	randolphi	PARATYPE	C.rndi.014	F	VII	Laguna del Maule	-36.0027	-70.4555	2227	4	i				2009	L. Packer	Phacelia			PCYU CHI09-6-5-013	CTMI
C.(H.)	randolphi	PARATYPE	C.rndi.015	F	VII	Laguna del Maule	-36.0027	-70.4555	2227	4	i				2009	L. Packer	Phacelia			PCYU CHI09-6-5-010	CTMI
C.(H.)	randolphi	PARATYPE	C.rndi.016	F	VII	W of Laguna del Maule	-35.9901	-70.3977	2541	5	i				2009	L. Packer	Phacelia		CCDB-03755 E07	PCYU CHI09-6-5-056	PCYU
C.(H.)	randolphi	PARATYPE	C.rndi.017	F	VII	Rio Maule, Hwy 115, km 122	-35.9016	-70.6426	1359	1	iii		20		2013	S. Monckton & J. Postlethwaite		pan trap			PCYU
C.(H.)	randolphi	PARATYPE	C.rndi.018	F	VII	Rio Maule, Hwy 115, km 160	-35.9928	-70.3991	2505	1	iii		20		2013	S. Monckton & J. Postlethwaite		pan trap			PCYU
C.(H.)	randolphi	PARATYPE	C.rndi.019	F	VII	E of Laguna del Maule, 160.120km	-35.9928	-70.3991	2505	1	i		6		2013	L. Packer & R. Smith		white pan trap	CCDB-19991 D02		PCYU
C.(H.)	randolphi	PARATYPE	C.rndi.020	F	VIII	Ñuble, Las Trancas, Shangrila in Chillán area SE Recinto	-36.8765	-71.4683	1549	14	xii				1983	L. Peña					AMNH
C.(H.)	randolphi	PARATYPE	C.rndi.021	F	VIII	Ñuble, Las Trancas, SE Recinto in Chillán area	-36.9107	-71.4797	1250		i				1987	Luis E. Peña					AMNH
C.(H.)	travesia	HOLOTYPE	-	M	III	Travesía	-27.5399	-70.443	713		x				1972	Toro					AMNH
C.(H.)	travesia	ALLOTYPE	-	F	III	Travesía	-27.5399	-70.443	713		x				1972	Toro					AMNH
C.(H.)	travesia	PARATYPE	C.trav.001	M	III	Travesía	-27.5399	-70.443	713		x				1969	H. Toro					AMNH
C.(H.)	travesia	PARATYPE	C.trav.002	F	III	Travesía	-27.5399	-70.443	713		x				1969	H. Toro					AMNH
C.(H.)	travesia	PARATYPE	C.trav.003	M	III	Acatama Travesía	-27.5399	-70.443	713	23	x				1969	H. Toro				PUCV-ENTO 19915	PUCV
C.(H.)	travesia		C.trav.004	M	III	N of Huasco km 72	-27.8895	-71.0824	216	7	xi				2013	S. Monckton		pan trap	CCDB-19989 B07	PCYU 0021681	PCYU	dissected terminalia
C.(H.)	travesia		C.trav.005	M	III	Tres Playitas 10km N of Huasco Bajo	-28.3971	-71.1848	32	13	x				2001	L. Packer					PCYU	dissected terminalia
C.(H.)	travesia		C.trav.006	M	III	Castilla	-27.8556	-70.5967	327	18	ix				1986	L. Ruz					PUCV
C.(H.)	travesia		C.trav.007	M	III	(WP: 378) Pesquera Bahía Caldera	-27.0514	-70.8043	0	6	xi		15		2013	S. Monckton & J. Postlethwaite					CTMI
C.(H.)	travesia		C.trav.008	M	III	Parque Nacional Llanos de Challe	-28.1964	-71.044	230	13	x				2000	L. Packer					PCYU
C.(H.)	travesia		C.trav.009	M	III	Balneario Flamenco, S of Chanaral	-26.5725	-70.682	15	22	iii				2000	L. Packer					PCYU
C.(H.)	travesia		C.trav.010	M	III	4.4km N of Huasco Bajo	-28.4299	-71.1916	16	14	ix				2010	L. Packer					PCYU
C.(H.)	travesia		C.trav.011	M	III	4.4km N of Huasco Bajo	-28.4299	-71.1916	16	14	ix				2010	L. Packer					PCYU
C.(H.)	travesia		C.trav.012	M	III	4.4km N of Huasco Bajo	-28.4299	-71.1916	16	14	ix				2010	L. Packer					PCYU
C.(H.)	travesia		C.trav.013	M	III	4.4km N of Huasco Bajo	-28.4299	-71.1916	16	14	ix				2010	L. Packer					PCYU
C.(H.)	travesia		C.trav.014	M	III	Travesía	-27.5399	-70.443	713		ix				1986	De la Hoz					PUCV
C.(H.)	travesia		C.trav.015	M	III	Balneario Flamenco, S of Chanaral	-26.5725	-70.682	15	22	iii				2000	L. Packer					PCYU
C.(H.)	travesia		C.trav.016	M	III	Hwy 5, km 848	-27.3448	-70.6931	193	16	x				2009	J. Gibbs					PCYU
C.(H.)	travesia		C.trav.017	M	III	1 km N of Caldera	-27.0575	-70.8028	17	18	x				2009	J. Gibbs			Bee-BOL BOWGF1094-10 B04743E01-CHL		PCYU
C.(H.)	travesia		C.trav.018	M	III	Hwy 5, km 848	-27.3448	-70.6931	193	16	x				2009	J. Gibbs			Bee-BOL BOWGF1087-10 B04743D06-CHL		PCYU
C.(H.)	travesia		C.trav.019	M	III	Rd to Nantoco km 0	-27.6043	-70.4495	580	1	x				2013	S. Monckton			CCDB-19989 B04	PCYU 0021678	PCYU
C.(H.)	travesia		C.trav.020	F	III	Travesía	-27.5399	-70.443	713		ix				1986	De La Hoz Jr.					PUCV
C.(H.)	travesia		C.trav.021	F	III	Rd to Nantoco km 0	-27.6043	-70.4495	580	1	x				2013	S. Monckton			CCDB-19989 B05	PCYU 0021679	PCYU
C.(H.)	travesia		C.trav.022	F	III	2.4 km N of Huasco Bajo	-28.4554	-71.1849	19	19	x				2009	J. Gibbs			Bee-BOL BOWGF1091-10 B04743D10-CHL		PCYU
C.(H.)	travesia		C.trav.023	F	III	N of Huasco	-28.4402	-71.188	26	14	x				2013	S. Monckton		pan trap	CCDB-19989 C03	PCYU 0021689	PCYU
C.(H.)	travesia		C.trav.024	F	III	(WP: 378) Pesquera Bahía Caldera	-27.0541	-70.8043	0	6	xi		15		2013	S. Monckton & J. Postlethwaite					CTMI
C.(H.)	travesia		C.trav.025	F	III	Hwy 5, km 848	-27.3448	-70.6931	193	16	x				2009	J. Gibbs					PCYU
C.(H.)	travesia		C.trav.026	F	III	Parque Nacional Llanos de Challe	-28.1964	-71.044	230	13	x				2000	L. Packer					PCYU
C.(H.)	travesia		C.trav.027	F	III	N of Huasco	-28.4402	-71.188	26	14	x				2013	S. Monckton		pan trap	CCDB-19989 D04	PCYU 0021697	PCYU
C.(H.)	travesia		C.trav.028	F	III	N of Huasco, km 67.2	-27.9272	-71.0851	169	7	xi				2013	S. Monckton		pan trap	CCDB-19989 C01	PCYU 0021687	PCYU
C.(H.)	travesia		C.trav.029	F	III	Cta Totoral	-27.8316	-71.0841	14	7	xi				2013	S. Monckton		pan trap	CCDB-19989 C02	PCYU 0021688	PCYU
C.(H.)	travesia		C.trav.030	F	III	N of Huasco	-28.4402	-71.188	26	7	xi				2013	S. Monckton		pan trap	CCDB-19989 C04	PCYU 0021690	PCYU
C.(H.)	travesia	PARATYPE	C.trav.031	M	III	Travesía	-27.5399	-70.443	713		x				1969	H. Toro					AMNH
C.(H.)	travesia		C.trav.032	M	III	Atacama Prov., 50-60km S Copiapó	-27.7982	-70.5006	500	24	viii				1966	M.E. Irwin & E.I. Schlinger					BBSL
C.(H.)	travesia		C.trav.033	M	III	Castilla	-27.8556	-70.5967	327		ix				1986	H. Toro					AMNH
C.(H.)	travesia	PARATYPE	C.trav.034	M	III	Travesía	-27.5399	-70.443	713		x				1969	H. Toro					AMNH
C.(H.)	travesia	PARATYPE	C.trav.035	F	III	Travesía	-27.5399	-70.443	713		x				1972	H. Toro	Heliotropium				AMNH
C.(H.)	travesia		C.trav.036	F	III	Atacama Prov., 50-60km S Copiapó	-27.7982	-70.5006	500	24	viii				1966	M.E. Irwin & E.I. Schlinger					BBSL
C.(H.)	travesia	PARATYPE	C.trav.037	F	III	Travesía	-27.5399	-70.443	713		x				1972	H. Toro					AMNH
C.(H.)	travesia	PARATYPE	C.trav.038	F	III	Via Panam N of Caldera	-27.0575	-70.8028	17	2	x				1972	J.L. Neff	Cristaria				AMNH
C.(H.)	travesia	PARATYPE	C.trav.039	F	III	Travesía	-27.5399	-70.443	713		x				1969	H. Toro					AMNH
C.(H.)	travesia	PARATYPE	C.trav.040	F	III	Travesía	-27.5399	-70.443	713		x				1972	H. Toro	Heliotropium				AMNH
C.(H.)	travesia		C.trav.041	M	III	6 km N of Huasco	-28.4361	-71.1846	87	14	x				2013	S. Monckton					PCYU
C.(H.)	travesia		C.trav.042	M	III	2.4 km N of Huasco Bajo	-28.4554	-71.1848	112	19	x				2009	J. Gibbs				PCYU-JG09-199	PCYU
C.(H.)	travesia		C.trav.043	M	III	Ruta 5, Km 773	-27.6421	-70.4634	600	25	x				1995	L. Ruz					PUCV
C.(H.)	travesia		C.trav.044	M	III	Ruta 5, Km 773	-27.6421	-70.4634	600	25	x				1995	S. Rodriguez					BBSL
C.(H.)	travesia		C.trav.045	M	III	Ruta 5, Km 773	-27.6421	-70.4634	600	25	x				1995	S. Rodriguez					BBSL
C.(H.)	travesia		C.trav.046	M	III	Ruta 5, Km 773	-27.6421	-70.4634	600	25	x				1995	S. Rodriguez					BBSL
C.(H.)	travesia		C.trav.047	F	III	6 km N of Huasco	-28.4361	-71.1846	87	14	x				2013	S. Monckton					PCYU
C.(H.)	travesia		C.trav.048	F	III	6 km N of Huasco	-28.4361	-71.1846	87	14	x				2013	S. Monckton					PCYU
C.(H.)	travesia		C.trav.049	F	III	6 km N of Huasco	-28.4361	-71.1846	87	14	x				2013	S. Monckton					PCYU
C.(H.)	travesia		C.trav.050	F	III	6 km N of Huasco	-28.4361	-71.1846	87	14	x				2013	S. Monckton					PCYU
C.(H.)	travesia		C.trav.051	F	III	N of Huasco	-28.4402	-71.188	26	14	x				2013	S. Monckton					PCYU
C.(H.)	travesia		C.trav.052	F	III	N of Huasco	-28.4402	-71.188	26	14	x				2013	S. Monckton					PCYU
C.(H.)	travesia		C.trav.053	F	III	N of Huasco	-28.4402	-71.188	26	14	x				2013	S. Monckton					PCYU
C.(H.)	travesia		C.trav.054	F	III	6 km N of Huasco	-28.4361	-71.1846	87	14	x				2013	S. Monckton					PCYU
C.(H.)	travesia		C.trav.055	F	III	6 km N of Huasco	-28.4361	-71.1846	87	14	x				2013	S. Monckton					PCYU
C.(H.)	travesia		C.trav.056	F	III	6 km N of Huasco	-28.4361	-71.1846	87	14	x				2013	S. Monckton					PCYU
C.(H.)	travesia		C.trav.057	F	III	6 km N of Huasco	-28.4361	-71.1846	87	14	x				2013	S. Monckton					PCYU
C.(H.)	travesia		C.trav.058	F	III	6 km N of Huasco	-28.4361	-71.1846	87	14	x				2013	S. Monckton					PCYU
C.(H.)	travesia		C.trav.059	F	III	6 km N of Huasco	-28.4361	-71.1846	87	14	x				2013	S. Monckton					PCYU
C.(H.)	travesia		C.trav.060	F	III	6 km N of Huasco	-28.4361	-71.1846	87	14	x				2013	S. Monckton					PCYU
C.(H.)	travesia		C.trav.061	F	III	6 km N of Huasco	-28.4361	-71.1846	87	14	x				2013	S. Monckton					PCYU
C.(H.)	travesia		C.trav.062	F	III	6 km N of Huasco	-28.4361	-71.1846	87	14	x				2013	S. Monckton					PCYU
C.(H.)	travesia		C.trav.063	F	III	6 km N of Huasco	-28.4361	-71.1846	87	14	x				2013	S. Monckton					PCYU
C.(H.)	travesia		C.trav.064	F	III	6 km N of Huasco	-28.4361	-71.1846	87	14	x				2013	S. Monckton					PCYU
C.(H.)	travesia		C.trav.065	F	III	N of Huasco	-28.4402	-71.188	26	14	x				2013	S. Monckton					PCYU
C.(H.)	travesia		C.trav.066	F	III	N of Huasco	-28.4402	-71.188	26	14	x				2013	S. Monckton					PCYU
C.(H.)	travesia		C.trav.067	F	III	N of Huasco	-28.4402	-71.188	26	14	x				2013	S. Monckton					PCYU
C.(H.)	travesia		C.trav.068	F	III	N of Huasco	-28.4402	-71.188	26	14	x				2013	S. Monckton					PCYU
C.(H.)	travesia		C.trav.069	F	III	N of Huasco	-28.4402	-71.188	26	14	x				2013	S. Monckton					PCYU
C.(H.)	travesia		C.trav.070	F	III	N of Huasco	-28.4402	-71.188	26	14	x				2013	S. Monckton					PCYU
C.(H.)	travesia		C.trav.071	F	III	N of Huasco	-28.4402	-71.188	26	14	x				2013	S. Monckton					CTMI
C.(H.)	travesia		C.trav.072	F	III	N of Huasco	-28.4402	-71.188	26	14	x				2013	S. Monckton					PCYU
C.(H.)	travesia		C.trav.073	F	III	N of Huasco	-28.4402	-71.188	26	14	x				2013	S. Monckton					PCYU
C.(H.)	travesia		C.trav.074	F	III	N of Huasco	-28.4402	-71.188	26	14	x				2013	S. Monckton					PCYU
C.(H.)	travesia		C.trav.075	F	III	N of Huasco	-28.4402	-71.188	26	14	x				2013	S. Monckton					PCYU
C.(H.)	travesia		C.trav.076	F	III	N of Huasco	-28.4402	-71.188	26	14	x				2013	S. Monckton					PCYU
C.(H.)	travesia		C.trav.077	F	III	N of Huasco	-28.4402	-71.188	26	14	x				2013	S. Monckton					PCYU
C.(H.)	travesia		C.trav.078	F	III	N of Huasco, km 43	-28.1131	-71.1542	55	7	xi				2013	S. Monckton					PCYU
C.(H.)	travesia		C.trav.079	F	III	N of Huasco, km 18	-28.3248	-71.1442	37	7	xi				2013	S. Monckton					PCYU
C.(H.)	travesia		C.trav.080	F	III	N of Huasco	-28.4402	-71.188	26	14	x				2013	S. Monckton					PCYU
C.(H.)	travesia		C.trav.081	F	III	Pesquera Bahía Caldera	-27.0541	-70.8043	15	6	xi				2013	S. Monckton					PCYU
C.(H.)	travesia		C.trav.082	F	III	Pesquera Bahía Caldera	-27.0541	-70.8043	15	6	xi				2013	S. Monckton					PCYU
C.(H.)	travesia		C.trav.083	F	III	Pesquera Bahía Caldera	-27.0541	-70.8043	15	6	xi				2013	S. Monckton					PCYU
C.(H.)	travesia		C.trav.084	F	III	S of Chañaral, Ruta 5, km 930	-26.665	-70.7172	21	7	iv				2013	S. Monckton					PCYU
C.(H.)	travesia		C.trav.085	F	III	N of Huasco	-28.4402	-71.188	26	14	x				2013	S. Monckton		pan trap	CCDB-19989 D03	PCYU 0021696	PCYU
C.(H.)	travesia		C.trav.086	F	III	Tres Playitas, 10 km N of Huasco Bajo	-28.3971	-71.1848	32	13	x				2001	L. Packer					PCYU	dissected sting
C.(H.)	travesia		C.trav.087	F	III	Parque Nacional Llanos de Challe	-28.1964	-71.044	230	13	x				2000	L. Packer					PCYU
C.(H.)	travesia		C.trav.088	F	III	Balneario Flamenco, S of Chanaral	-26.5725	-70.682	15	22	iii				2000	L. Packer					CTMI
C.(H.)	travesia		C.trav.089	F	III	Balneario Flamenco, S of Chanaral	-26.5725	-70.682	15	22	iii				2000	L. Packer					PCYU
C.(H.)	travesia		C.trav.090	F	III	C-451, 2.3 km E of Ruta 5	-28.0188	-70.5538	488	22	x		25		2010	L. Packer		pan trap			PCYU
C.(H.)	travesia		C.trav.091	F	III	C-451, 2.3 km E of Ruta 5	-28.0188	-70.5538	488	22	x		25		2010	L. Packer		pan trap			PCYU
C.(H.)	travesia		C.trav.092	F	III	N of Huasco	-28.4402	-71.188	26	14	x				2013	S. Monckton					PCYU
C.(H.)	vicugna	ALLOTYPE	-	F	IV	El Pangue	-30.1677	-70.6627	1711		x				1972	Cabezas					AMNH
C.(H.)	vicugna	HOLOTYPE	-	M	IV	El Pangue	-30.1677	-70.6627	1711		x				1972	Toro					AMNH
C.(H.)	vicugna		C.dsrt.280	M	IV	Las Breas	-30.3685	-70.6128	1622	2016-11-19	ix				2010	L. Packer					PCYU
C.(H.)	vicugna		C.dsrt.281	M	IV	Las Breas	-30.3685	-70.6128	1622	2016-11-19	ix				2010	L. Packer					PCYU
C.(H.)	vicugna		C.dsrt.282	F	IV	Las Breas	-30.3685	-70.6128	1622	2016-11-19	ix				2010	L. Packer					PCYU
C.(H.)	vicugna		C.dsrt.283	F	IV	Las Breas	-30.3685	-70.6128	1622	2016-11-19	ix				2010	L. Packer					PCYU
C.(H.)	vicugna	NEOTYPE	C.vcna.001	M	IV	Elqui Prov. 26 km S Vicuña	-30.1903	-70.6608	1691	5	x				1994	Rozen, Quinter, Ascher					AMNH
C.(H.)	vicugna	PARATYPE	C.vcna.002	M	IV	El Pangue	-30.1677	-70.6627	1711		x				1972	H. Toro	Pleurophora pusilla				AMNH
C.(H.)	vicugna		C.vcna.003	F	IV	Chañar-Los Lavadores	-30.2963	-70.6273	1396	10	ix				2010	L. Packer			B09866-F08 Bees of Chile257		PCYU
C.(H.)	vicugna		C.vcna.004	M	IV	Chañares	-30.2955	-70.6288	1389	12	ix				1984	H. Toro					AMNH	dissected terminalia & hindleg
C.(H.)	vicugna		C.vcna.005	M	IV	E of Vicuña, 127.8 km	-29.9777	-70.2293	1711	12	ix		19		2010	L. Packer					PCYU	dissected abdomen
C.(H.)	vicugna		C.vcna.006	M	III	Emb. Sta Juana, C-479 km 21.5	-28.6747	-70.6432	645	15	x				2013	S. Monckton			CCDB-19989 A08	PCYU 0021670	PCYU
C.(H.)	vicugna		C.vcna.007	M	IV	41-CH km 137.8	-29.967	-70.1936	1800	8	xi				2013	S. Monckton		pan trap	CCDB-19989 B11	PCYU 0021685	PCYU
C.(H.)	vicugna		C.vcna.008	M	IV	Chañares	-30.2955	-70.6288	1389	12	ix				1984	H. Toro					AMNH
C.(H.)	vicugna		C.vcna.009	M	IV	Chañares	-30.2955	-70.6288	1389	12	ix				1984	De la Hoz					AMNH
C.(H.)	vicugna		C.vcna.010	M	IV	Chañares	-30.2955	-70.6288	1389	12	ix				1984	De la Hoz					AMNH
C.(H.)	vicugna		C.vcna.011	M	IV	Elqui Prov. bet. Chapilca & Guanta	-29.8435	-70.4613	1107	7	x				1994	Rozen, Quinter, Ascher					AMNH
C.(H.)	vicugna		C.vcna.012	M	IV	Elqui Prov. 19km S Pisco Elqui	-30.2653	-70.4985	1991	6	x				1994	Rozen, Quinter, Ascher					AMNH
C.(H.)	vicugna		C.vcna.013	M	IV	Elqui Prov. 19km S Pisco Elqui	-30.2653	-70.4985	1991	6	x				1994	Rozen, Quinter, Ascher					AMNH
C.(H.)	vicugna		C.vcna.014	M	IV	Elqui: 4-5 km south Pisco	-30.3834	-70.3466	1340	27	x				1992	Andrey Sharkov					AMNH
C.(H.)	vicugna		C.vcna.015	M	IV	E of Vicuña, 127.8 km	-29.9777	-70.2293	1711	12	ix		19		2010	L. Packer					PCYU
C.(H.)	vicugna		C.vcna.016	M	IV	E of Vicuña, 127.8 km	-29.9777	-70.2293	1711	12	ix		19		2010	L. Packer					PCYU
C.(H.)	vicugna		C.vcna.017	M	IV	Chañar-Los Lavadores	-30.2963	-70.6273	1396	10	ix				2010	L. Packer			B09866-F09 Bees of Chile258		PCYU
C.(H.)	vicugna		C.vcna.018	M	IV	Hwy 41-CH, km 133	-29.9657	-70.2015	1716	17	x		8	xi	2013	S. Monckton					PCYU
C.(H.)	vicugna		C.vcna.019	F	IV	Puente Las Terneras	-29.9888	-70.2522	1644	4	v				2010	Packer & Fraser			B09866-A08 Bees of Chile197		PCYU
C.(H.)	vicugna		C.vcna.020	F	IV	41-CH km 137.8	-29.967	-70.1936	1800	8	xi				2013	S. Monckton		pan trap	CCDB-19989 B12	PCYU 0021686	PCYU
C.(H.)	vicugna		C.vcna.021	F	III	Emb. Sta Juana, C-479 km 21.5	-28.6747	-70.6432	645	15	x				2013	S. Monckton			CCDB-19989 A09	PCYU 0021671	PCYU
C.(H.)	vicugna		C.vcna.022	F	IV	S of Vicuña km 97	-30.1415	-70.6901	1304	3	x				2013	S. Monckton			CCDB-19989 B06	PCYU 0021680	PCYU
C.(H.)	vicugna		C.vcna.023	F	IV	Chañar-Los Lavadores	-30.2963	-70.6273	1396	10	ix				2010	L. Packer			B09866-F07 Bees of Chile256		PCYU
C.(H.)	vicugna		C.vcna.024	F	IV	El Pangue	-30.1677	-70.6627	1711	13	x				1977	De la Hoz					PUCV
C.(H.)	vicugna		C.vcna.025	F	IV	Chañares	-30.2955	-70.6288	1389	12	ix				1984	De la Hoz					AMNH
C.(H.)	vicugna		C.vcna.026	F	IV	E of Vicuña, 127.8 km	-29.9777	-70.2293	1711	12	ix		19		2010	L. Packer					PCYU
C.(H.)	vicugna		C.vcna.027	F	IV	E of Vicuña, 127.8 km	-29.9777	-70.2293	1711	12	ix		19		2010	L. Packer					PCYU
C.(H.)	vicugna		C.vcna.028	F	IV	E of Vicuña, 127.8 km	-29.9777	-70.2293	1711	12	ix		19		2010	L. Packer					PCYU
C.(H.)	vicugna		C.vcna.029	F	IV	E of Vicuña, 127.8 km	-29.9777	-70.2293	1711	12	ix		19		2010	L. Packer					PCYU
C.(H.)	vicugna		C.vcna.030	F	IV	E of Vicuña, 127.8 km	-29.9777	-70.2293	1711	12	ix		19		2010	L. Packer					PCYU
C.(H.)	vicugna		C.vcna.031	F	IV	E of Vicuña, 127.8 km	-29.9777	-70.2293	1711	12	ix		19		2010	L. Packer					PCYU
C.(H.)	vicugna		C.vcna.032	F	IV	E of Rivadavia, 41-CH, km 83	-29.9619	-70.541	855	5	xi				2013	S. Monckton					PCYU
C.(H.)	vicugna		C.vcna.033	F	IV	E of Rivadavia, 41-CH, km 83	-29.9619	-70.541	855	5	xi				2013	S. Monckton					PCYU
C.(H.)	vicugna		C.vcna.034	F	IV	E of Rivadavia, 41-CH, km 83	-29.9619	-70.541	855	5	xi				2013	S. Monckton					PCYU
C.(H.)	vicugna		C.vcna.035	F	IV	E of Rivadavia, 41-CH, km 83	-29.9619	-70.541	855	5	xi				2013	S. Monckton					PCYU
C.(H.)	vicugna		C.vcna.036	F	IV	Incahuasi	-29.2281	-71.0139	779	1	x				1982	De la Hoz					PUCV
C.(H.)	vicugna		C.vcna.037	M	IV	E of Vicuña, 127.8 km	-29.9777	-70.2293	1711	12	ix		19		2010	L. Packer					PCYU
C.(H.)	vicugna		C.vcna.038	M	IV	E of Vicuña km 114	-29.9123	-70.3013	1429		ix				2010	L. Packer		fluor. yellow pan			PCYU
C.(H.)	vicugna		C.vcna.039	M	IV	E of Vicuña, 127.8 km	-29.9777	-70.2293	1711	12	ix		19		2010	L. Packer					PCYU
C.(H.)	vicugna		C.vcna.040	M	IV	E of Vicuña, km 114	-29.9123	-70.3013	1429		ix				2010	L. Packer		white pan			PCYU
C.(H.)	vicugna		C.vcna.041	M	IV	E of Vicuña, km 114	-29.9123	-70.3013	1429		ix				2010	L. Packer		white pan			PCYU
C.(H.)	vicugna		C.vcna.042	M	IV	E of Vicuña, km 114	-29.9123	-70.3013	1429		ix				2010	L. Packer		white pan			PCYU
C.(H.)	vicugna		C.vcna.043	M	IV	E of Vicuña, km 114	-29.9123	-70.3013	1429		ix				2010	L. Packer		white pan			PCYU
C.(H.)	vicugna		C.vcna.044	M	IV	E of Vicuña, km 114	-29.9123	-70.3013	1429		ix				2010	L. Packer		white pan			PCYU
C.(H.)	vicugna		C.vcna.045	M	IV	E of Vicuña, km 114	-29.9123	-70.3013	1429		ix				2010	L. Packer		white pan			PCYU
C.(H.)	vicugna		C.vcna.046	M	IV	E of Vicuña, km 114	-29.9123	-70.3013	1429		ix				2010	L. Packer		white pan			PCYU
C.(H.)	vicugna		C.vcna.047	M	IV	E of Vicuña, km 114	-29.9123	-70.3013	1429		ix				2010	L. Packer		white pan			PCYU
C.(H.)	vicugna		C.vcna.048	M	IV	E of Vicuña, km 114	-29.9123	-70.3013	1429		ix				2010	L. Packer		blue pan			PCYU
C.(H.)	vicugna		C.vcna.049	M	IV	E of Vicuña, km 114	-29.9123	-70.3013	1429		ix				2010	L. Packer		blue pan			PCYU
C.(H.)	vicugna		C.vcna.050	M	IV	E of Vicuña, km 114	-29.9123	-70.3013	1429		ix				2010	L. Packer		blue pan			PCYU
C.(H.)	vicugna		C.vcna.051	M	IV	E of Vicuña, 127.8 km	-29.9777	-70.2293	1711	12	ix		19		2010	L. Packer					PCYU
C.(H.)	vicugna		C.vcna.052	M	IV	E of Vicuña km 114	-29.9123	-70.3013	1429		ix				2010	L. Packer		fluor. yellow pan			PCYU
C.(H.)	vicugna		C.vcna.053	M	IV	E of Vicuña km 114	-29.9123	-70.3013	1429		ix				2010	L. Packer		fluor. yellow pan			PCYU
C.(H.)	vicugna		C.vcna.054	M	IV	E of Vicuña km 114	-29.9123	-70.3013	1429		ix				2010	L. Packer		fluor. yellow pan			PCYU
C.(H.)	vicugna		C.vcna.055	M	IV	Chañares	-30.2955	-70.6288	1389	12	ix				1984	H. Toro					PUCV
C.(H.)	vicugna		C.vcna.056	M	IV	Chañares	-30.2955	-70.6288	1389	12	ix				1984	H. Toro					PUCV
C.(H.)	vicugna		C.vcna.057	M	IV	Chañares	-30.2955	-70.6288	1389	12	ix				1984	De La Hoz					PUCV
C.(H.)	vicugna		C.vcna.058	M	IV	E of Vicuña, 127.8 km	-29.9777	-70.2293	1711	12	ix		19		2010	L. Packer					PCYU
C.(H.)	vicugna		C.vcna.059	M	IV	E of Vicuña, 127.8 km	-29.9777	-70.2293	1711	12	ix		19		2010	L. Packer					PCYU
C.(H.)	vicugna		C.vcna.060	M	IV	E of Vicuña, 127.8 km	-29.9777	-70.2293	1711	12	ix		19		2010	L. Packer					PCYU
C.(H.)	vicugna		C.vcna.061	M	IV	E of Vicuña, 127.8 km	-29.9777	-70.2293	1711	12	ix		19		2010	L. Packer					PCYU
C.(H.)	vicugna		C.vcna.062	M	IV	E of Vicuña, 127.8 km	-29.9777	-70.2293	1711	12	ix		19		2010	L. Packer					PCYU
C.(H.)	vicugna		C.vcna.063	M	IV	E of Vicuña, 127.8 km	-29.9777	-70.2293	1711	12	ix		19		2010	L. Packer					PCYU
C.(H.)	vicugna		C.vcna.064	M	IV	E of Vicuña, 127.8 km	-29.9777	-70.2293	1711	12	ix		19		2010	L. Packer					PCYU
C.(H.)	vicugna		C.vcna.065	M	IV	E of Vicuña, 127.8 km	-29.9777	-70.2293	1711	12	ix		19		2010	L. Packer					PCYU
C.(H.)	vicugna		C.vcna.066	M	IV	E of Vicuña, 127.8 km	-29.9777	-70.2293	1711	12	ix		19		2010	L. Packer					PCYU
C.(H.)	vicugna		C.vcna.067	M	IV	E of Vicuña, 127.8 km	-29.9777	-70.2293	1711	12	ix		19		2010	L. Packer					PCYU
C.(H.)	vicugna		C.vcna.068	M	IV	E of Vicuña, 127.8 km	-29.9777	-70.2293	1711	12	ix		19		2010	L. Packer					PCYU
C.(H.)	vicugna		C.vcna.069	M	IV	E of Vicuña, 127.8 km	-29.9777	-70.2293	1711	12	ix		19		2010	L. Packer					PCYU
C.(H.)	vicugna		C.vcna.070	M	IV	E of Vicuña, 127.8 km	-29.9777	-70.2293	1711	12	ix		19		2010	L. Packer					PCYU
C.(H.)	vicugna		C.vcna.071	M	IV	E of Vicuña, 127.8 km	-29.9777	-70.2293	1711	12	ix		19		2010	L. Packer					PCYU
C.(H.)	vicugna		C.vcna.072	M	IV	E of Vicuña, 127.8 km	-29.9777	-70.2293	1711	12	ix		19		2010	L. Packer					PCYU
C.(H.)	vicugna		C.vcna.073	M	IV	E of Vicuña, 127.8 km	-29.9777	-70.2293	1711	12	ix		19		2010	L. Packer					PCYU
C.(H.)	vicugna		C.vcna.074	M	IV	E of Vicuña, 127.8 km	-29.9777	-70.2293	1711	12	ix		19		2010	L. Packer					PCYU
C.(H.)	vicugna		C.vcna.075	M	IV	E of Vicuña, 127.8 km	-29.9777	-70.2293	1711	12	ix		19		2010	L. Packer					PCYU
C.(H.)	vicugna		C.vcna.076	M	IV	E of Vicuña, 127.8 km	-29.9777	-70.2293	1711	12	ix		19		2010	L. Packer					PCYU
C.(H.)	vicugna		C.vcna.077	M	IV	E of Vicuña, 127.8 km	-29.9777	-70.2293	1711	12	ix		19		2010	L. Packer					PCYU
C.(H.)	vicugna		C.vcna.078	M	IV	E of Vicuña, 127.8 km	-29.9777	-70.2293	1711	12	ix		19		2010	L. Packer					PCYU
C.(H.)	vicugna		C.vcna.079	M	IV	E of Vicuña, 127.8 km	-29.9777	-70.2293	1711	12	ix		19		2010	L. Packer					PCYU
C.(H.)	vicugna		C.vcna.080	M	IV	E of Vicuña, 127.8 km	-29.9777	-70.2293	1711	12	ix		19		2010	L. Packer					PCYU
C.(H.)	vicugna		C.vcna.081	M	IV	E of Vicuña, 127.8 km	-29.9777	-70.2293	1711	12	ix		19		2010	L. Packer					PCYU
C.(H.)	vicugna		C.vcna.082	M	IV	E of Vicuña, 127.8 km	-29.9777	-70.2293	1711	12	ix		19		2010	L. Packer					PCYU
C.(H.)	vicugna		C.vcna.083	M	IV	E of Vicuña, 127.8 km	-29.9777	-70.2293	1711	12	ix		19		2010	L. Packer					PCYU
C.(H.)	vicugna		C.vcna.084	M	IV	E of Vicuña, 127.8 km	-29.9777	-70.2293	1711	12	ix		19		2010	L. Packer					PCYU
C.(H.)	vicugna		C.vcna.085	M	IV	E of Vicuña, 127.8 km	-29.9777	-70.2293	1711	12	ix		19		2010	L. Packer					PCYU
C.(H.)	vicugna		C.vcna.086	M	IV	E of Vicuña, 127.8 km	-29.9777	-70.2293	1711	12	ix		19		2010	L. Packer					PCYU
C.(H.)	vicugna		C.vcna.087	M	IV	E of Vicuña, 127.8 km	-29.9777	-70.2293	1711	12	ix		19		2010	L. Packer					BBSL
C.(H.)	vicugna		C.vcna.088	M	IV	E of Vicuña, 127.8 km	-29.9777	-70.2293	1711	12	ix		19		2010	L. Packer					BBSL
C.(H.)	vicugna		C.vcna.089	M	IV	E of Vicuña, 127.8 km	-29.9777	-70.2293	1711	12	ix		19		2010	L. Packer					BBSL
C.(H.)	vicugna		C.vcna.090	M	IV	E of Vicuña, 127.8 km	-29.9777	-70.2293	1711	12	ix		19		2010	L. Packer					CTMI
C.(H.)	vicugna		C.vcna.091	M	IV	E of Vicuña, 127.8 km	-29.9777	-70.2293	1711	12	ix		19		2010	L. Packer					CTMI
C.(H.)	vicugna		C.vcna.092	M	IV	E of Vicuña, 127.8 km	-29.9777	-70.2293	1711	12	ix		19		2010	L. Packer					CTMI
C.(H.)	vicugna		C.vcna.093	M	IV	E of Guanta (Huanta), km 127.840	-29.8852	-70.2602	1613	12	ix				2010	L. Packer					PCYU
C.(H.)	vicugna		C.vcna.094	M	IV	E of Guanta (Huanta), km 127.840	-29.8852	-70.2602	1613	12	ix				2010	L. Packer					PCYU
C.(H.)	vicugna		C.vcna.095	M	IV	E of Guanta (Huanta), km 127.840	-29.8852	-70.2602	1613	12	ix				2010	L. Packer					PCYU
C.(H.)	vicugna		C.vcna.096	M	IV	E of Guanta (Huanta), km 127.840	-29.8852	-70.2602	1613	12	ix				2010	L. Packer					PCYU
C.(H.)	vicugna		C.vcna.097	M	IV	E of Guanta (Huanta), km 127.840	-29.8852	-70.2602	1613	12	ix				2010	L. Packer					PCYU
C.(H.)	vicugna		C.vcna.098	M	IV	Vicuña	-30.0321	-70.708	625	26	x				1972	H. Toro					AMNH
C.(H.)	vicugna		C.vcna.099	M	IV	Chañares	-30.2955	-70.6288	1389	12	ix				1984	De La Hoz				PUCV-ENTO 21886	PUCV
C.(H.)	vicugna		C.vcna.100	M	IV	E of Vicuña, 127.8 km	-29.9777	-70.2293	1711	12	ix		19		2010	L. Packer					PCYU
C.(H.)	vicugna		C.vcna.101	F	IV	E of Vicuña, km 114	-29.9123	-70.3013	1429		ix				2010	L. Packer		white pan			PCYU
C.(H.)	vicugna		C.vcna.102	F	IV	E of Vicuña, km 114	-29.9123	-70.3013	1429		ix				2010	L. Packer		white pan			PCYU
C.(H.)	vicugna		C.vcna.103	F	IV	E of Vicuña, km 114	-29.9123	-70.3013	1429		ix				2010	L. Packer		white pan			PCYU
C.(H.)	vicugna		C.vcna.104	F	IV	E of Vicuña, km 114	-29.9123	-70.3013	1429		ix				2010	L. Packer		white pan			PCYU
C.(H.)	vicugna		C.vcna.105	F	IV	E of Vicuña, km 114	-29.9123	-70.3013	1429		ix				2010	L. Packer		white pan			PCYU
C.(H.)	vicugna		C.vcna.106	F	IV	E of Vicuña, km 114	-29.9123	-70.3013	1429		ix				2010	L. Packer		white pan			PCYU
C.(H.)	vicugna		C.vcna.107	F	IV	E of Vicuña, km 114	-29.9123	-70.3013	1429		ix				2010	L. Packer		white pan			PCYU
C.(H.)	vicugna		C.vcna.108	F	IV	E of Vicuña, km 114	-29.9123	-70.3013	1429		ix				2010	L. Packer		white pan			PCYU
C.(H.)	vicugna		C.vcna.109	F	IV	E of Vicuña, km 114	-29.9123	-70.3013	1429		ix				2010	L. Packer		white pan			PCYU
C.(H.)	vicugna		C.vcna.110	F	IV	E of Vicuña, km 114	-29.9123	-70.3013	1429		ix				2010	L. Packer		white pan			PCYU
C.(H.)	vicugna		C.vcna.111	F	IV	E of Vicuña, km 114	-29.9123	-70.3013	1429		ix				2010	L. Packer		white pan			PCYU
C.(H.)	vicugna		C.vcna.112	F	IV	E of Vicuña, km 114	-29.9123	-70.3013	1429		ix				2010	L. Packer		white pan			PCYU
C.(H.)	vicugna		C.vcna.113	F	IV	E of Vicuña, km 114	-29.9123	-70.3013	1429		ix				2010	L. Packer		white pan			PCYU
C.(H.)	vicugna		C.vcna.114	F	IV	E of Vicuña, km 114	-29.9123	-70.3013	1429		ix				2010	L. Packer		white pan			PCYU
C.(H.)	vicugna		C.vcna.115	F	IV	E of Vicuña, km 114	-29.9123	-70.3013	1429		ix				2010	L. Packer		white pan			PCYU
C.(H.)	vicugna		C.vcna.116	F	IV	E of Vicuña, km 114	-29.9123	-70.3013	1429		ix				2010	L. Packer		white pan			PCYU
C.(H.)	vicugna		C.vcna.117	F	IV	E of Vicuña, km 114	-29.9123	-70.3013	1429		ix				2010	L. Packer		white pan			PCYU
C.(H.)	vicugna		C.vcna.118	F	IV	E of Vicuña, km 114	-29.9123	-70.3013	1429		ix				2010	L. Packer		white pan			PCYU
C.(H.)	vicugna		C.vcna.119	F	IV	E of Vicuña, km 114	-29.9123	-70.3013	1429		ix				2010	L. Packer		white pan			PCYU
C.(H.)	vicugna		C.vcna.120	F	IV	E of Vicuña, km 114	-29.9123	-70.3013	1429		ix				2010	L. Packer		blue pan			PCYU
C.(H.)	vicugna		C.vcna.121	F	IV	E of Vicuña, km 114	-29.9123	-70.3013	1429		ix				2010	L. Packer		blue pan			PCYU
C.(H.)	vicugna		C.vcna.122	F	IV	E of Vicuña, km 114	-29.9123	-70.3013	1429		ix				2010	L. Packer		blue pan			PCYU
C.(H.)	vicugna		C.vcna.123	F	IV	E of Vicuña, km 114	-29.9123	-70.3013	1429		ix				2010	L. Packer		blue pan			PCYU
C.(H.)	vicugna		C.vcna.124	F	IV	E of Vicuña, km 114	-29.9123	-70.3013	1429		ix				2010	L. Packer		blue pan			PCYU
C.(H.)	vicugna		C.vcna.125	F	IV	E of Vicuña, km 114	-29.9123	-70.3013	1429		ix				2010	L. Packer		blue pan			PCYU
C.(H.)	vicugna		C.vcna.126	F	IV	E of Vicuña, km 114	-29.9123	-70.3013	1429		ix				2010	L. Packer		blue pan			PCYU
C.(H.)	vicugna		C.vcna.127	F	IV	E of Vicuña, km 114	-29.9123	-70.3013	1429		ix				2010	L. Packer		blue pan			PCYU
C.(H.)	vicugna		C.vcna.128	F	IV	E of Vicuña, km 114	-29.9123	-70.3013	1429		ix				2010	L. Packer		blue pan			PCYU
C.(H.)	vicugna		C.vcna.129	F	IV	E of Vicuña, km 114	-29.9123	-70.3013	1429		ix				2010	L. Packer		blue pan			PCYU
C.(H.)	vicugna		C.vcna.130	F	IV	Elqui Prov. 26 km S of Vicuña	-30.1903	-70.6608	1691	5	x				1994	Rozen, Quinter, Ascher					AMNH
C.(H.)	vicugna		C.vcna.131	F	IV	Limarí Prov. Embalse Recoleta, 21 km NE Ovalle	-30.4946	-71.0855	406	11	x		12		1994	Rozen, Quinter, Ascher					AMNH
C.(H.)	vicugna		C.vcna.132	F	IV	E of Vicuña, km 114	-29.9123	-70.3013	1429		ix				2010	L. Packer		blue pan			PCYU
C.(H.)	vicugna		C.vcna.133	F	Iv	Elqui Prov. 7 km S of Pisco Elqui	-30.1765	-70.4862	1449	8	x				1994	Rozen, Quinter, Ascher					AMNH
C.(H.)	vicugna		C.vcna.134	F	IV	Limarí Prov. Las Mollacas, E Monte Patria	-30.7535	-70.6573	1142	13	x				1994	Rozen, Quinter, Ascher	Salix chilensis				AMNH
C.(H.)	vicugna		C.vcna.135	F	IV	Elqui Prov, 7 km S of Pisco Elqui	-30.1765	-70.4862	1449	8	x				1994	Rozen, Quinter, Ascher					AMNH
C.(H.)	vicugna		C.vcna.136	F	IV	Incahuasi	-29.2281	-71.0139	779	1	x				1982	De La Hoz					PUCV
C.(H.)	vicugna		C.vcna.137	F	IV	Elqui Prov., Pangue	-30.1539	-70.6639	1686	11	ix		30		2004	A. Ugarte					PCYU
C.(H.)	vicugna		C.vcna.138	F	IV	Puente Las Terneras	-29.9089	-70.2522	1644	4	x				2010	L. Packer			CCDB-19989 C11	PCYU 0021693	PCYU
C.(H.)	vicugna		C.vcna.139	F	IV	E of Vicuña km 114	-29.9123	-70.3013	1429		ix				2010	L. Packer		fluor. yellow pan			PCYU
C.(H.)	vicugna		C.vcna.140	F	IV	E of Vicuña km 114	-29.9123	-70.3013	1429		ix				2010	L. Packer		fluor. yellow pan			PCYU
C.(H.)	vicugna		C.vcna.141	F	IV	E of Vicuña km 114	-29.9123	-70.3013	1429		ix				2010	L. Packer		fluor. yellow pan			PCYU
C.(H.)	vicugna		C.vcna.142	F	IV	E of Vicuña km 114	-29.9123	-70.3013	1429		ix				2010	L. Packer		fluor. yellow pan			PCYU
C.(H.)	vicugna		C.vcna.143	F	IV	E of Vicuña km 114	-29.9123	-70.3013	1429		ix				2010	L. Packer		fluor. yellow pan			PCYU
C.(H.)	vicugna		C.vcna.144	F	IV	E of Vicuña km 114	-29.9123	-70.3013	1429		ix				2010	L. Packer		fluor. yellow pan			PCYU
C.(H.)	vicugna		C.vcna.145	F	IV	E of Vicuña km 114	-29.9123	-70.3013	1429		ix				2010	L. Packer		fluor. yellow pan			PCYU
C.(H.)	vicugna		C.vcna.146	F	IV	E of Vicuña km 114	-29.9123	-70.3013	1429		ix				2010	L. Packer		fluor. yellow pan			PCYU
C.(H.)	vicugna		C.vcna.147	F	IV	E of Vicuña km 114	-29.9123	-70.3013	1429		ix				2010	L. Packer		fluor. yellow pan			PCYU
C.(H.)	vicugna		C.vcna.148	F	IV	E of Vicuña km 114	-29.9123	-70.3013	1429		ix				2010	L. Packer		fluor. yellow pan			PCYU
C.(H.)	vicugna		C.vcna.149	F	IV	E of Vicuña km 114	-29.9123	-70.3013	1429		ix				2010	L. Packer		fluor. yellow pan			PCYU
C.(H.)	vicugna		C.vcna.150	F	IV	E of Vicuña km 114	-29.9123	-70.3013	1429		ix				2010	L. Packer		fluor. yellow pan			PCYU
C.(H.)	vicugna		C.vcna.151	F	IV	E of Vicuña km 114	-29.9123	-70.3013	1429		ix				2010	L. Packer		fluor. yellow pan			PCYU
C.(H.)	vicugna		C.vcna.152	F	IV	E of Vicuña km 114	-29.9123	-70.3013	1429		ix				2010	L. Packer		fluor. yellow pan			PCYU
C.(H.)	vicugna		C.vcna.153	F	IV	E of Vicuña km 114	-29.9123	-70.3013	1429		ix				2010	L. Packer		fluor. yellow pan			PCYU
C.(H.)	vicugna		C.vcna.154	F	IV	El Pangue	-30.1677	-70.6627	1711	13	x				1977	L. Ruz					PUCV
C.(H.)	vicugna		C.vcna.155	F	IV	Chañares	-30.2955	-70.6288	1389	12	ix				1984	H. Toro					PUCV
C.(H.)	vicugna		C.vcna.156	F	IV	Incahuasi	-29.2281	-71.0139	779	1	x				1982	O. Martinez					PUCV
C.(H.)	vicugna		C.vcna.157	F	IV	Incahuasi	-29.2281	-71.0139	779	1	x				1982	O. Martinez					PUCV
C.(H.)	vicugna		C.vcna.158	F	IV	Vicuña	-30.0319	-70.7081	1157	26	x				1972	H. Toro					PUCV
C.(H.)	vicugna		C.vcna.159	F	IV	Chañares	-30.2955	-70.6288	1389	12	ix				1984	P. Guerrero					PUCV
C.(H.)	vicugna		C.vcna.160	F	IV	Chañares	-30.2955	-70.6288	1389	12	ix				1984	H. Toro					AMNH
C.(H.)	vicugna		C.vcna.161	F	IV	Chañares	-30.2955	-70.6288	1389	12	ix				1984	H. Toro					AMNH
C.(H.)	vicugna		C.vcna.162	F	IV	E of Vicuña, 127.8 km	-29.9777	-70.2293	1711	12	ix		19		2010	L. Packer					PCYU
C.(H.)	vicugna		C.vcna.163	F	IV	E of Vicuña, 127.8 km	-29.9777	-70.2293	1711	12	ix		19		2010	L. Packer					PCYU
C.(H.)	vicugna		C.vcna.164	F	IV	E of Vicuña, 127.8 km	-29.9777	-70.2293	1711	12	ix		19		2010	L. Packer					PCYU
C.(H.)	vicugna		C.vcna.165	F	IV	E of Vicuña, 127.8 km	-29.9777	-70.2293	1711	12	ix		19		2010	L. Packer					PCYU
C.(H.)	vicugna		C.vcna.166	F	IV	E of Vicuña, 127.8 km	-29.9777	-70.2293	1711	12	ix		19		2010	L. Packer					PCYU
C.(H.)	vicugna		C.vcna.167	F	IV	E of Vicuña, 127.8 km	-29.9777	-70.2293	1711	12	ix		19		2010	L. Packer					PCYU
C.(H.)	vicugna		C.vcna.168	F	IV	E of Vicuña, 127.8 km	-29.9777	-70.2293	1711	12	ix		19		2010	L. Packer					PCYU
C.(H.)	vicugna		C.vcna.169	F	IV	E of Vicuña, 127.8 km	-29.9777	-70.2293	1711	12	ix		19		2010	L. Packer					PCYU
C.(H.)	vicugna		C.vcna.170	F	IV	E of Vicuña, 127.8 km	-29.9777	-70.2293	1711	12	ix		19		2010	L. Packer					PCYU
C.(H.)	vicugna		C.vcna.171	F	IV	E of Vicuña, 127.8 km	-29.9777	-70.2293	1711	12	ix		19		2010	L. Packer					PCYU
C.(H.)	vicugna		C.vcna.172	F	IV	E of Vicuña, 127.8 km	-29.9777	-70.2293	1711	12	ix		19		2010	L. Packer					PCYU
C.(H.)	vicugna		C.vcna.173	F	IV	E of Vicuña, 127.8 km	-29.9777	-70.2293	1711	12	ix		19		2010	L. Packer					PCYU
C.(H.)	vicugna		C.vcna.174	F	IV	E of Vicuña, 127.8 km	-29.9777	-70.2293	1711	12	ix		19		2010	L. Packer					PCYU
C.(H.)	vicugna		C.vcna.175	F	IV	E of Vicuña, 127.8 km	-29.9777	-70.2293	1711	12	ix		19		2010	L. Packer					PCYU
C.(H.)	vicugna		C.vcna.176	F	IV	E of Vicuña, 127.8 km	-29.9777	-70.2293	1711	12	ix		19		2010	L. Packer					PCYU
C.(H.)	vicugna		C.vcna.177	F	IV	E of Vicuña, 127.8 km	-29.9777	-70.2293	1711	12	ix		19		2010	L. Packer					PCYU
C.(H.)	vicugna		C.vcna.178	F	IV	E of Vicuña, 127.8 km	-29.9777	-70.2293	1711	12	ix		19		2010	L. Packer					PCYU
C.(H.)	vicugna		C.vcna.179	F	IV	E of Vicuña, 127.8 km	-29.9777	-70.2293	1711	12	ix		19		2010	L. Packer					PCYU
C.(H.)	vicugna		C.vcna.180	F	IV	E of Vicuña, 127.8 km	-29.9777	-70.2293	1711	12	ix		19		2010	L. Packer					PCYU
C.(H.)	vicugna		C.vcna.181	F	IV	E of Vicuña, 127.8 km	-29.9777	-70.2293	1711	12	ix		19		2010	L. Packer					PCYU
C.(H.)	vicugna		C.vcna.182	F	IV	E of Vicuña, 127.8 km	-29.9777	-70.2293	1711	12	ix		19		2010	L. Packer					PCYU
C.(H.)	vicugna		C.vcna.183	F	IV	E of Vicuña, 127.8 km	-29.9777	-70.2293	1711	12	ix		19		2010	L. Packer					PCYU
C.(H.)	vicugna		C.vcna.184	F	IV	E of Vicuña, 127.8 km	-29.9777	-70.2293	1711	12	ix		19		2010	L. Packer					PCYU
C.(H.)	vicugna		C.vcna.185	F	IV	E of Vicuña, 127.8 km	-29.9777	-70.2293	1711	12	ix		19		2010	L. Packer					PCYU
C.(H.)	vicugna		C.vcna.186	F	IV	E of Vicuña, 127.8 km	-29.9777	-70.2293	1711	12	ix		19		2010	L. Packer					PCYU
C.(H.)	vicugna		C.vcna.187	F	IV	E of Vicuña, 127.8 km	-29.9777	-70.2293	1711	12	ix		19		2010	L. Packer					PCYU
C.(H.)	vicugna		C.vcna.188	F	IV	E of Vicuña, 127.8 km	-29.9777	-70.2293	1711	12	ix		19		2010	L. Packer					PCYU
C.(H.)	vicugna		C.vcna.189	F	IV	E of Vicuña, 127.8 km	-29.9777	-70.2293	1711	12	ix		19		2010	L. Packer					PCYU
C.(H.)	vicugna		C.vcna.190	F	IV	E of Vicuña, 127.8 km	-29.9777	-70.2293	1711	12	ix		19		2010	L. Packer					PCYU
C.(H.)	vicugna		C.vcna.191	F	IV	E of Vicuña, 127.8 km	-29.9777	-70.2293	1711	12	ix		19		2010	L. Packer					PCYU
C.(H.)	vicugna		C.vcna.192	F	IV	E of Vicuña, 127.8 km	-29.9777	-70.2293	1711	12	ix		19		2010	L. Packer					PCYU
C.(H.)	vicugna		C.vcna.193	F	IV	E of Vicuña, 127.8 km	-29.9777	-70.2293	1711	12	ix		19		2010	L. Packer					PCYU
C.(H.)	vicugna		C.vcna.194	F	IV	E of Vicuña, 127.8 km	-29.9777	-70.2293	1711	12	ix		19		2010	L. Packer					PCYU
C.(H.)	vicugna		C.vcna.195	F	IV	E of Vicuña, 127.8 km	-29.9777	-70.2293	1711	12	ix		19		2010	L. Packer					PCYU
C.(H.)	vicugna		C.vcna.196	F	IV	E of Vicuña, 127.8 km	-29.9777	-70.2293	1711	12	ix		19		2010	L. Packer					PCYU
C.(H.)	vicugna		C.vcna.197	F	IV	E of Vicuña, 127.8 km	-29.9777	-70.2293	1711	12	ix		19		2010	L. Packer					PCYU
C.(H.)	vicugna		C.vcna.198	F	IV	E of Vicuña, 127.8 km	-29.9777	-70.2293	1711	12	ix		19		2010	L. Packer					PCYU
C.(H.)	vicugna		C.vcna.199	F	IV	E of Vicuña, 127.8 km	-29.9777	-70.2293	1711	12	ix		19		2010	L. Packer					PCYU
C.(H.)	vicugna		C.vcna.200	F	IV	E of Vicuña, 127.8 km	-29.9777	-70.2293	1711	12	ix		19		2010	L. Packer					PCYU
C.(H.)	vicugna		C.vcna.201	F	IV	E of Vicuña, 127.8 km	-29.9777	-70.2293	1711	12	ix		19		2010	L. Packer					PCYU
C.(H.)	vicugna		C.vcna.202	F	IV	E of Vicuña, 127.8 km	-29.9777	-70.2293	1711	12	ix		19		2010	L. Packer					PCYU
C.(H.)	vicugna		C.vcna.203	F	IV	E of Vicuña, 127.8 km	-29.9777	-70.2293	1711	12	ix		19		2010	L. Packer					PCYU
C.(H.)	vicugna		C.vcna.204	F	IV	E of Vicuña, 127.8 km	-29.9777	-70.2293	1711	12	ix		19		2010	L. Packer					PCYU
C.(H.)	vicugna		C.vcna.205	F	IV	E of Vicuña, 127.8 km	-29.9777	-70.2293	1711	12	ix		19		2010	L. Packer					PCYU
C.(H.)	vicugna		C.vcna.206	F	IV	E of Vicuña, 127.8 km	-29.9777	-70.2293	1711	12	ix		19		2010	L. Packer					PCYU
C.(H.)	vicugna		C.vcna.207	F	IV	E of Vicuña, 127.8 km	-29.9777	-70.2293	1711	12	ix		19		2010	L. Packer					PCYU
C.(H.)	vicugna		C.vcna.208	F	IV	E of Vicuña, 127.8 km	-29.9777	-70.2293	1711	12	ix		19		2010	L. Packer					PCYU
C.(H.)	vicugna		C.vcna.209	F	IV	E of Vicuña, 127.8 km	-29.9777	-70.2293	1711	12	ix		19		2010	L. Packer					PCYU
C.(H.)	vicugna		C.vcna.210	F	IV	E of Vicuña, 127.8 km	-29.9777	-70.2293	1711	12	ix		19		2010	L. Packer					PCYU
C.(H.)	vicugna		C.vcna.211	F	IV	E of Vicuña, 127.8 km	-29.9777	-70.2293	1711	12	ix		19		2010	L. Packer					PCYU
C.(H.)	vicugna		C.vcna.212	F	IV	E of Vicuña, 127.8 km	-29.9777	-70.2293	1711	12	ix		19		2010	L. Packer					PCYU
C.(H.)	vicugna		C.vcna.213	F	IV	E of Vicuña, 127.8 km	-29.9777	-70.2293	1711	12	ix		19		2010	L. Packer					PCYU
C.(H.)	vicugna		C.vcna.214	F	IV	E of Vicuña, 127.8 km	-29.9777	-70.2293	1711	12	ix		19		2010	L. Packer					PCYU
C.(H.)	vicugna		C.vcna.215	F	IV	E of Vicuña, 127.8 km	-29.9777	-70.2293	1711	12	ix		19		2010	L. Packer					PCYU
C.(H.)	vicugna		C.vcna.216	F	IV	E of Vicuña, 127.8 km	-29.9777	-70.2293	1711	12	ix		19		2010	L. Packer					PCYU
C.(H.)	vicugna		C.vcna.217	F	IV	E of Vicuña, 127.8 km	-29.9777	-70.2293	1711	12	ix		19		2010	L. Packer					PCYU
C.(H.)	vicugna		C.vcna.218	F	IV	E of Vicuña, 127.8 km	-29.9777	-70.2293	1711	12	ix		19		2010	L. Packer					PCYU
C.(H.)	vicugna		C.vcna.219	F	IV	E of Vicuña, 127.8 km	-29.9777	-70.2293	1711	12	ix		19		2010	L. Packer					PCYU
C.(H.)	vicugna		C.vcna.220	F	IV	E of Vicuña, 127.8 km	-29.9777	-70.2293	1711	12	ix		19		2010	L. Packer					PCYU
C.(H.)	vicugna		C.vcna.221	F	IV	E of Vicuña, 127.8 km	-29.9777	-70.2293	1711	12	ix		19		2010	L. Packer					PCYU
C.(H.)	vicugna		C.vcna.222	F	IV	E of Vicuña, 127.8 km	-29.9777	-70.2293	1711	12	ix		19		2010	L. Packer					PCYU
C.(H.)	vicugna		C.vcna.223	F	IV	E of Vicuña, 127.8 km	-29.9777	-70.2293	1711	12	ix		19		2010	L. Packer					PCYU
C.(H.)	vicugna		C.vcna.224	F	IV	E of Vicuña, 127.8 km	-29.9777	-70.2293	1711	12	ix		19		2010	L. Packer					PCYU
C.(H.)	vicugna		C.vcna.225	F	IV	E of Vicuña, 127.8 km	-29.9777	-70.2293	1711	12	ix		19		2010	L. Packer					PCYU
C.(H.)	vicugna		C.vcna.226	F	IV	E of Vicuña, 127.8 km	-29.9777	-70.2293	1711	12	ix		19		2010	L. Packer					PCYU
C.(H.)	vicugna		C.vcna.227	F	IV	E of Vicuña, 127.8 km	-29.9777	-70.2293	1711	12	ix		19		2010	L. Packer					PCYU
C.(H.)	vicugna		C.vcna.228	F	IV	E of Vicuña, 127.8 km	-29.9777	-70.2293	1711	12	ix		19		2010	L. Packer					PCYU
C.(H.)	vicugna		C.vcna.229	F	IV	E of Vicuña, 127.8 km	-29.9777	-70.2293	1711	12	ix		19		2010	L. Packer					PCYU
C.(H.)	vicugna		C.vcna.230	F	IV	E of Vicuña, 127.8 km	-29.9777	-70.2293	1711	12	ix		19		2010	L. Packer					PCYU
C.(H.)	vicugna		C.vcna.231	F	IV	E of Vicuña, 127.8 km	-29.9777	-70.2293	1711	12	ix		19		2010	L. Packer					PCYU
C.(H.)	vicugna		C.vcna.232	F	IV	E of Vicuña, 127.8 km	-29.9777	-70.2293	1711	12	ix		19		2010	L. Packer					PCYU
C.(H.)	vicugna		C.vcna.233	F	IV	E of Vicuña, 127.8 km	-29.9777	-70.2293	1711	12	ix		19		2010	L. Packer					PCYU
C.(H.)	vicugna		C.vcna.234	F	IV	E of Vicuña, 127.8 km	-29.9777	-70.2293	1711	12	ix		19		2010	L. Packer					BBSL
C.(H.)	vicugna		C.vcna.235	F	IV	E of Vicuña, 127.8 km	-29.9777	-70.2293	1711	12	ix		19		2010	L. Packer					BBSL
C.(H.)	vicugna		C.vcna.236	F	IV	E of Vicuña, 127.8 km	-29.9777	-70.2293	1711	12	ix		19		2010	L. Packer					BBSL
C.(H.)	vicugna		C.vcna.237	F	IV	E of Vicuña, 127.8 km	-29.9777	-70.2293	1711	12	ix		19		2010	L. Packer					CTMI
C.(H.)	vicugna		C.vcna.238	F	IV	E of Vicuña, 127.8 km	-29.9777	-70.2293	1711	12	ix		19		2010	L. Packer					CTMI
C.(H.)	vicugna		C.vcna.239	F	IV	E of Vicuña, 127.8 km	-29.9777	-70.2293	1711	12	ix		19		2010	L. Packer					CTMI
C.(H.)	vicugna		C.vcna.240	F	IV	Limari Prov., Embalse Recoleta, 21 km NE Ovalle	-30.4946	-71.0855	406	11	x		12		1994	Rozen, Quinter, Ascher					AMNH
C.(H.)	vicugna		C.vcna.241	F	IV	Limari Prov., Embalse Recoleta, 21 km NE Ovalle	-30.4946	-71.0855	406	11	x		12		1994	Rozen, Quinter, Ascher					AMNH
C.(H.)	vicugna		C.vcna.242	F	IV	Limari Prov., Embalse Recoleta, 21 km NE Ovalle	-30.4946	-71.0855	406	11	x		12		1994	Rozen, Quinter, Ascher					AMNH
C.(H.)	vicugna		C.vcna.243	F	IV	Limari Prov., Embalse Recoleta, 21 km NE Ovalle	-30.4946	-71.0855	406	11	x		12		1994	Rozen, Quinter, Ascher					AMNH
C.(H.)	vicugna		C.vcna.244	F	IV	Elqui: 26 km south Vicuña	-30.1903	-70.6608	1691	1	xi				1992	Rozen, Sharkov, Snyder					AMNH
C.(H.)	vicugna		C.vcna.245	F	IV	Elqui: 26 km south Vicuña	-30.1903	-70.6608	1691	1	xi				1992	Rozen, Sharkov, Snyder					AMNH
C.(H.)	vicugna		C.vcna.246	F	IV	Limari Prov., Embalse Recoleta, 21 km NE Ovalle	-30.4946	-71.0855	406	11	x		12		1994	Rozen, Quinter, Ascher					AMNH
C.(H.)	vicugna		C.vcna.247	F	IV	Elqui: 26 km south Vicuña	-30.1903	-70.6608	1691	1	x				1992	Rozen, Sharkov, Snyder					AMNH
C.(H.)	vicugna		C.vcna.248	F	IV	Elqui: 26 km south Vicuña	-30.1903	-70.6608	1691	1	x				1992	Rozen, Sharkov, Snyder					AMNH
C.(H.)	vicugna		C.vcna.249	F	IV	Elqui Prov. Bet. Chapilca & Guanta	-29.8435	-70.4613	1107	7	x				1994	Rozen, Quinter, Ascher					AMNH
C.(H.)	vicugna		C.vcna.250	F	IV	Elqui Prov. Bet. Chapilca & Guanta	-29.8435	-70.4613	1107	7	x				1994	Rozen, Quinter, Ascher					AMNH
C.(H.)	vicugna		C.vcna.251	F	IV	Elqui Prov. 19 km S Pisco Elqui	-30.2653	-70.4985	1991	6	x				1994	Rozen, Quinter, Ascher					AMNH
C.(H.)	vicugna		C.vcna.252	F	IV	Elqui Prov. 19 km S Pisco Elqui	-30.2653	-70.4985	1991	6	x				1994	Rozen, Quinter, Ascher					AMNH
C.(H.)	vicugna		C.vcna.253	F	IV	Elqui Prov. El Pangue 24 km S of Vicuña	-30.1677	-70.6627	1711	31	x				1992	Snyder & Sharkov					AMNH
C.(H.)	vicugna		C.vcna.254	F	IV	Elqui Prov. 7 km S Pisco Elqui	-30.1765	-70.4862	1449	8	x				1994	Rozen, Quinter, Ascher					AMNH
C.(H.)	vicugna		C.vcna.255	F	IV	Elqui Prov. 7 km S Pisco Elqui	-30.1765	-70.4862	1449	8	x				1994	Rozen, Quinter, Ascher					AMNH
C.(H.)	vicugna		C.vcna.256	F	IV	Limarí Prov. Las Mollacas, E Monte Patria	-30.7535	-70.6573	1142	13	x				1994	Rozen, Quinter, Ascher					AMNH
C.(H.)	vicugna		C.vcna.257	F	IV	Elqui Prov. 26 km S of Vicuña	-30.1903	-70.6608	1691	5	x				1994	Rozer, Quinter, Ascher					AMNH
C.(H.)	vicugna		C.vcna.258	F	IV	Limarí Prov. Embalse Recoleta, 21 km NE of Ovalle	-30.4946	-71.0855	406	11	x		12		1994	Rozen, Quinter, Ascher					AMNH
C.(H.)	vicugna		C.vcna.259	F	IV	Vicuña	-30.0321	-70.708	625	12	ix				1968	H. Toro					AMNH
C.(H.)	vicugna		C.vcna.260	F	IV	El Tofo	-29.4423	-71.2518	631	27	x				1972	H. Toro					AMNH
C.(H.)	vicugna		C.vcna.261	F	IV	Elqui Prov. 6 km S of Vicuña	-30.0852	-70.7246	889	23	x		24		1992	Rozen, Sharkov, Snyder					AMNH
C.(H.)	vicugna		C.vcna.262	F	IV	E of Guanta (Huanta), km 114.420	-29.8852	-70.3214	1349	4	x				2012	L. Packer					PCYU
C.(H.)	vicugna		C.vcna.263	F	IV	E of Guanta (Huanta), km 127.840	-29.8852	-70.2602	1613	12	ix				2010	L. Packer					PCYU
C.(H.)	vicugna		C.vcna.264	F	III	E of Vallenar	-28.7716	-70.4486	830	1	x				2013	L. Packer					PCYU
C.(H.)	vicugna		C.vcna.265	F	IV	Hwy 41-CH, km 132	-29.0541	-70.1936	800	8	xi				2013	S. Monckton					PCYU
C.(H.)	vicugna		C.vcna.266	F	IV	E of Vicuña, 127.8 km	-29.9777	-70.2293	1711	12	ix		19		2010	L. Packer					PCYU
C.(H.)	vicugna		C.vcna.267	F	IV	E of Vicuña, 127.8 km	-29.9777	-70.2293	1711	12	ix		19		2010	L. Packer					PCYU
C.(H.)	vicugna		C.vcna.268	F	IV	Elqui Prov., Pangue	-30.1539	-70.6639	1686	11	ix		30		2004	A. Ugarte					PCYU
C.(H.)	vicugna		C.vcna.269	F	III	Embalse Santa Juana, C-479, km 21.5	-28.6747	-70.6432	645	15	x				2013	S. Monckton				PCYU 0020916	PCYU
C.(H.)	vicugna		C.vcna.270	F	IV	Puente Las Temeras	-29.9089	-70.2522	1644	4	x				2010	L. Packer				PCYU 0021700	PCYU
C.(H.)	vicugna		C.vcna.271	F	IV	E of Vicuña, 127.8 km	-29.9777	-70.2293	1711	12	ix		19		2010	L. Packer					PCYU
C.(H.)	vicugna		C.vcna.272	F	IV	E of Vicuña, km 114	-29.9123	-70.3013	1429		ix				2010	L. Packer		blue pan			PCYU
C.(H.)	vicugna		C.vcna.273	F	IV	E of Vicuña, 127.8 km	-29.9777	-70.2293	1711	12	ix		19		2010	L. Packer					PCYU
C.(H.)	vicugna		C.vcna.274	F	IV	E of Vicuña, 127.8 km	-29.9777	-70.2293	1711	12	ix		19		2010	L. Packer					PCYU
C.(H.)	vicugna		C.vcna.275	F	IV	Puente Las Temeras	-29.9089	-70.2522	1644	4	x				2010	L. Packer				PCYU 0021699	PCYU
C.(H.)	vicugna		C.vcna.276	F	IV	E of Vicuña, 127.8 km	-29.9777	-70.2293	1711	12	ix		19		2010	L. Packer					PCYU
C.(H.)	vicugna		C.vcna.277	F	IV	E of Vicuña, km 114	-29.9123	-70.3013	1429		ix				2010	L. Packer		blue pan			PCYU
C.(H.)	vicugna		C.vcna.278	F	IV	E of Vicuña km 114	-29.9123	-70.3013	1429		ix				2010	L. Packer		fluor. yellow pan			PCYU
C.(H.)	vicugna		C.vcna.279	F	III	Embalse Santa Juana, C-479, km 21.5	-28.6747	-70.6432	645	15	x				2013	S. Monckton				PCYU 0020915	PCYU
C.(H.)	vina	HOLOTYPE	-	M	V	Cuesta la Dormida	-33.067	-71.0194	1197							Moldenke					AMNH
C.(H.)	vina	ALLOTYPE	-	F	V	Cuesta la Dormida	-33.067	-71.0194	1197							Moldenke					AMNH
C.(H.)	vina		C.vina.001	M	RM	Nr Caleu	-33.0089	-70.9966	1230	26	x				2010	L. Packer			B09857-C02 Bees of Chile310		PCYU
C.(H.)	vina	PARATYPE	C.vina.002	F	RM	Pr. Valparaíso & Santiago, Cuesta La Dormida	-33.0679	-70.998	1078			1970			1972	A.R. Moldenke				INT. BIOL. PROGRAM	AMNH
C.(H.)	vina		C.vina.003	M	RM	Pte. Alto	-33.6167	-70.5666	705	4	iii				2001	F. Vivallo	Aloysium citriodora				UFRJ
C.(H.)	vina		C.vina.004	M	V	Colliguay	-33.1712	-71.1637	491	17	ix				1976	O. Martinez					PUCV	cleared terminalia
C.(H.)	vina		C.vina.005	M	RM	Quebrada de San Ramón	-33.4329	-70.5159	853		xii				1974	L.E. Peña					AMNH
C.(H.)	vina		C.vina.006	M	V	El Salto	-33.0412	-71.522	31	6	xi				1966	L. Ruz					PUCV
C.(H.)	vina		C.vina.007	M	V	Valparaíso Prov., Río Marga Marga, Los Perales	-33.15	-71.3167	330	13	x				1966	M. Irwin & E.I. Schlinger					BBSL
C.(H.)	vina		C.vina.008	M	V	Cuesta la Dormida	-33.067	-71.0194	1197	26	x				2010	L. Packer				PCYU 0004674	PCYU
C.(H.)	vina		C.vina.009	M	RM	Pte. Alto	-33.6167	-70.5666	705	5	xii				1999	F. Vivallo					UFRJ
C.(H.)	vina		C.vina.010	M	RM	Pte. Alto	-33.6167	-70.5666	705	4	ii				2001	F. Vivallo	Aloysium citriodora				UFRJ
C.(H.)	vina		C.vina.011	M	RM	Pte. Alto	-33.6167	-70.5666	705	4	ii				2001	F. Vivallo					UFRJ
C.(H.)	vina		C.vina.012	M	RM	Pte. Alto	-33.6167	-70.5666	705	4	ii				2001	F. Vivallo					UFRJ
C.(H.)	vina		C.vina.013	M	RM	Pte. Alto	-33.6167	-70.5666	705	4	ii				2001	F. Vivallo	Aloysium citriodora				UFRJ
C.(H.)	vina		C.vina.014	M	RM	Pte. Alto	-33.6167	-70.5666	705	4	ii				2001	F. Vivallo	Aloysium citriodora				UFRJ
C.(H.)	vina		C.vina.015	M	RM	Pte. Alto	-33.6167	-70.5666	705	4	ii				2001	F. Vivallo					UFRJ
C.(H.)	vina		C.vina.016	M	RM	Pte. Alto	-33.6167	-70.5666	705	4	ii				2001	F. Vivallo					UFRJ
C.(H.)	vina		C.vina.017	M	RM	Pte. Alto	-33.6167	-70.5666	705	4	ii				2001	F. Vivallo	Aloysium citriodora				UFRJ
C.(H.)	vina		C.vina.018	M	RM	Pte. Alto	-33.6167	-70.5666	705	4	ii				2001	F. Vivallo					UFRJ
C.(H.)	vina		C.vina.019	M	RM	Pte. Alto	-33.6167	-70.5666	705	4	ii				2001	F. Vivallo	Aloysium citriodora				UFRJ
C.(H.)	vina		C.vina.020	M	RM	Pte. Alto	-33.6167	-70.5666	705	4	ii				2001	F. Vivallo					UFRJ
C.(H.)	vina		C.vina.021	M	RM	Pte. Alto	-33.6167	-70.5666	705	4	ii				2001	F. Vivallo	Aloysium citriodora				UFRJ
C.(H.)	vina		C.vina.022	M	RM	Pte. Alto	-33.6167	-70.5666	705	4	ii				2001	F. Vivallo					UFRJ
C.(H.)	vina		C.vina.023	M	RM	Pte. Alto	-33.6167	-70.5666	705	4	ii				2001	F. Vivallo					UFRJ
C.(H.)	vina		C.vina.024	M	RM	Pte. Alto	-33.6167	-70.5666	705	4	ii				2001	F. Vivallo					UFRJ
C.(H.)	vina		C.vina.025	M	RM	Pte. Alto	-33.6167	-70.5666	705	4	ii				2001	F. Vivallo	Aloysium citriodora				UFRJ
C.(H.)	vina		C.vina.026	M	RM	Pte. Alto	-33.6167	-70.5666	705	4	ii				2001	F. Vivallo					UFRJ
C.(H.)	vina		C.vina.027	M	RM	Pte. Alto	-33.6167	-70.5666	705	25	xii				2001	F. Vivallo	Aloysium citriodora				UFRJ
C.(H.)	vina		C.vina.028	M	RM	Pte. Alto	-33.6167	-70.5666	705	25	xii				2001	F. Vivallo	Aloysium citriodora				UFRJ
C.(H.)	vina		C.vina.029	M	RM	Pte. Alto	-33.6167	-70.5666	705	25	xii				2001	F. Vivallo					UFRJ
C.(H.)	vina		C.vina.030	M	RM	Pte. Alto	-33.6167	-70.5666	705	25	xii				2001	F. Vivallo	Aloysium citriodora				UFRJ
C.(H.)	vina		C.vina.031	M	RM	Pte. Alto	-33.6167	-70.5666	705	25	xii				2001	F. Vivallo	Aloysium citriodora				UFRJ
C.(H.)	vina		C.vina.032	M	RM	Pte. Alto	-33.6167	-70.5666	705	25	xii				2001	F. Vivallo	Aloysium citriodora				UFRJ
C.(H.)	vina		C.vina.033	M	RM	Pte. Alto	-33.6167	-70.5666	705	10	i				2000	F. Vivallo	Aloysium citriodora				UFRJ
C.(H.)	vina		C.vina.034	M	RM	Pte. Alto	-33.6167	-70.5666	705	5	xii				1999	F. Vivallo	Aloysium citriodora				UFRJ
C.(H.)	vina		C.vina.035	M	RM	Pte. Alto	-33.6167	-70.5666	705	5	xii				1999	F. Vivallo	Aloysium citriodora				UFRJ
C.(H.)	vina		C.vina.036	M	RM	Pte. Alto	-33.6167	-70.5666	705	4	iii				2001	F. Vivallo	Aloysium citriodora				UFRJ
C.(H.)	vina		C.vina.037	M	RM	Pte. Alto	-33.6167	-70.5666	705	4	iii				2001	F. Vivallo	Aloysium citriodora				UFRJ
C.(H.)	vina		C.vina.038	M	RM	Pte. Alto	-33.6167	-70.5666	705	4	ii				2001	F. Vivallo					UFRJ	dissected terminalia
C.(H.)	vina		C.vina.039	M	RM	Pte. Alto	-33.6167	-70.5666	705	25	xii				2001	F. Vivallo					UFRJ	dissected terminalia & hindleg
C.(H.)	vina		C.vina.040	M	RM	Pte. Alto	-33.6167	-70.5666	705	4	ii				2001	F. Vivallo	Aloysium citriodora				UFRJ	cleared specimen
C.(H.)	vina		C.vina.041	M	IV	Los Molles	-30.7496	-70.6486	1147	12	X				2013	S. Monckton			CCDB-19989 B01	PCYU 0021675	PCYU	dissected terminalia
C.(H.)	vina		C.vina.042	M	RM	E of El Volcán	-33.8282	-70.0436	1963	31	xii	2012	7	i	2013	L. Packer & R. Smith		pan trap	CCDB-22789 D09		PCYU
C.(H.)	vina		C.vina.043	M	RM	E of El Volcan	-33.497	-70.0263	1953	7	i				2009	L. Packer			CCDB-03755 A09	PCYU CHI09-9-3-016	PCYU	dissected terminalia
C.(H.)	vina		C.vina.044	M	V	Aconcagua: Los Andes	-32.8091	-70.6454	767		xii				1989	Luis E. Peña					AMNH
C.(H.)	vina		C.vina.045	M	IV	Chañares	-30.2955	-70.6288	1389	12	ix				1984	H. Toro					PUCV
C.(H.)	vina		C.vina.046	M	IV	Elqui: 16 km south Pisco	-30.2475	-70.4945	1811	26	x				1992	A. Sharkov					AMNH
C.(H.)	vina		C.vina.047	M	IV	Elqui: 16 km south Pisco	-30.2475	-70.4945	1811	26	x				1992	A. Sharkov					AMNH
C.(H.)	vina		C.vina.048	M	IV	Elqui: 16 km south Pisco	-30.2475	-70.4945	1811	26	x				1992	A. Sharkov					AMNH	dissected terminalia
C.(H.)	vina		C.vina.049	M	IV	Elqui: 16 km south Pisco	-30.2475	-70.4945	1811	26	x				1992	A. Sharkov					AMNH	dissected terminalia
C.(H.)	vina		C.vina.050	M	IV	El Pangue	-30.1677	-70.6627	1711		x				1972	H. Toro					PUCV	dissected mouthparts, hindleg, terminalia
C.(H.)	vina		C.vina.051	F	IV	Las Breas	-30.3685	-70.6128	1622	23	ix				1980	H. Toro					AMNH
C.(H.)	vina		C.vina.052	F	IV	Los Molles	-30.7496	-70.6486	1147	12	x				2013	S. Monckton			CCDB-19989 B02	PCYU 0021676	PCYU
C.(H.)	vina		C.vina.053	F	V	Choapa, Pichidangui	-32.1383	-71.5067	15	10	ii				2003	F.D. Parker		pan trap	CHL-14610-84	USDA Native Bee Survey BBSL695284	BBSL
C.(H.)	vina		C.vina.054	F	IV	Los Vilos path of Lobos	-31.9376	-71.5155	15	11	v				2010	Packer & Fraser			B09866-D01 Bees of Chile226		PCYU
C.(H.)	vina		C.vina.055	F	RM	Caleu	-32.9979	-70.9774	1054	3	x				2000	L. Packer					PCYU
C.(H.)	vina		C.vina.056	F	RM	Caleu	-32.9979	-70.9774	1054	3	x				2000	L. Packer					PCYU
C.(H.)	vina		C.vina.057	F	V	Alto de Cantillana, Alhue	-33.9795	-70.9874	1398	25	xi				2000	L. Packer					PCYU
C.(H.)	vina		C.vina.058	F	V	Alto de Cantillana, Alhue	-33.9795	-70.9874	1398	25	xi				2000	L. Packer					PCYU
C.(H.)	vina		C.vina.059	F	V	Loncura	-32.7862	-71.5081	38	5	x				2000	L. Packer					PCYU
C.(H.)	vina		C.vina.060	F	V	Colliguay, Las Compuertas	-33.1694	-71.1342	515	4	x				2000	L. Packer			CCDB-03755 C03		PCYU
C.(H.)	vina		C.vina.061	F	V	Quinta Vergara	-33.0321	-71.5526	71	18	xi				2000	F. Vivallo					UFRJ
C.(H.)	vina		C.vina.062	F	RM	Pr. Valparaíso & Santiago, Cuesta La Dormida	-33.0679	-70.998	1078	20	x				1971	A.R. Moldenke	Loasa			INT. BIOL. PROGRAM 31210	AMNH
C.(H.)	vina		C.vina.063	F	RM	Pr. Valparaíso & Santiago, Cuesta La Dormida	-33.0679	-70.998	1078	9	x				1971	A.R. Moldenke				INT. BIOL. PROGRAM 31104	AMNH
C.(H.)	vina		C.vina.064	F	RM	Pr. Valparaíso & Santiago, Cuesta La Dormida	-33.0679	-70.998	1078	9	x				1971	A.R. Moldenke				INT. BIOL. PROGRAM 31108	AMNH
C.(H.)	vina		C.vina.065	F	RM	Pr. Valparaíso & Santiago, Cuesta La Dormida	-33.0679	-70.998	1078	20	x				1971	A.R. Moldenke	Stachys grandidentata			INT. BIOL. PROGRAM 31245	AMNH
C.(H.)	vina		C.vina.066	F	RM	Pr. Valparaíso & Santiago, Cuesta La Dormida	-33.0679	-70.998	1078	20	x				1971	A.R. Moldenke	Loasa			INT. BIOL. PROGRAM 31209	AMNH
C.(H.)	vina		C.vina.067	F	IV	Elqui Prov. 26 km S Vicuña	-30.1903	-70.6608	1691	5	x				1994	Rozen, Quinter, Ascher					AMNH
C.(H.)	vina		C.vina.068	F	IV	Los Molles	-30.7496	-70.6486	1147	12	x				2013	S. Monckton				PCYU 0020825	PCYU
C.(H.)	vina		C.vina.069	F	IV	Los Molles	-30.7496	-70.6486	1147	12	x				2013	S. Monckton				PCYU 0020826	PCYU
C.(H.)	vina		C.vina.070	M	RM	Espinalillo	-33.005	-70.9406	877	5	x				2013	L. Packer					PCYU
C.(H.)	vina		C.vina.071	M	RM	Espinalillo	-33.005	-70.9406	877	5	v				2013	L. Packer					PCYU
C.(H.)	vina		C.vina.072	M	IV	Limarí Prov., Chañar	-30.2804	-70.6402	1520	2016-11-30	ix				2004	A. Ugarte					PCYU
C.(H.)	vina		C.vina.073	M	RM	El Paico	-33.6885	-71.0547	252		i				1975	Luis E. Peña					AMNH
C.(H.)	vina		C.vina.074	M	RM	El Paico	-33.6885	-71.0547	252		i				1975	Luis E. Peña					AMNH
C.(H.)	vina		C.vina.075	M	RM	Chacabuco: Cuesta la Dormida	-33.0679	-70.998	1078	15	xi				1992	Rozen, Sharkov, Snyder					AMNH
C.(H.)	vina		C.vina.076	M	RM	Chacabuco: Cuesta la Dormida	-33.0679	-70.998	1078	15	xi				1992	Rozen, Sharkov, Snyder					AMNH
C.(H.)	vina		C.vina.077	F	RM	Espinalillo	-33.005	-70.9406	877	5	x				2013	L. Packer					PCYU
C.(H.)	vina		C.vina.078	F	RM	Pte Alto	-33.6167	-70.5666	705	10	i				2000	F. Vivallo					UFRJ
C.(H.)	vina		C.vina.079	F	RM	Espinalillo	-33.005	-70.9406	877	5	x				2013	L. Packer					PCYU
C.(H.)	vina		C.vina.080	F	RM	Espinalillo	-33.005	-70.9406	877	5	x				2013	L. Packer					PCYU
C.(H.)	vina		C.vina.081	F	V	Colliguay, Las Compuertas	-33.169	-71.134	514	4	x				2000	L. Packer			CCDB-19989 C08		PCYU
C.(H.)	vina		C.vina.082	F	V	Paihuén	-31.3842	-70.848	501	4	xii				1983	M. Rojas					PUCV
C.(H.)	vina		C.vina.083	F	RM	Pte Alto	-33.6167	-70.5666	705	5	xii				1999	F. Vivallo					UFRJ
C.(H.)	vina		C.vina.084	F	RM	Espinalillo	-33.005	-70.9406	877	5	x				2013	L. Packer					PCYU
C.(H.)	vina		C.vina.085	F	RM	Espinalillo	-33.005	-70.9406	877	5	x				2013	L. Packer					PCYU
C.(H.)	vina		C.vina.086	F	RM	Espinalillo	-33.005	-70.9406	877	5	x				2013	L. Packer					PCYU
C.(H.)	vina		C.vina.087	F	RM	Espinalillo	-33.005	-70.9406	877	5	x				2013	L. Packer					PCYU
C.(H.)	vina		C.vina.088	F	RM	Espinalillo	-33.005	-70.9406	877	5	x				2013	L. Packer					PCYU
C.(H.)	vina		C.vina.089	F	RM	Chacabuco: Cuesta la Dormida	-33.0679	-70.998	1078	15	xi				1992	Rozen, Sharkov, Snyder					AMNH
C.(H.)	vina		C.vina.090	F	RM	Chacabuco: Cuesta la Dormida	-33.0679	-70.998	1078	15	xi				1992	Rozen, Sharkov, Snyder					AMNH
C.(H.)	vina		C.vina.091	F	RM	Rio Maipo, El Manzano	-33.5869	-70.3949	898	18	i				1975	M. Pasten					AMNH
C.(H.)	vina		C.vina.092	F	V	Belloto	-33.0479	-71.4081	127	22	x				1967						PUCV
C.(H.)	vina		C.vina.093	F	RM	Pte Alto	-33.6167	-70.5666	705	5	xii				1999	F. Vivallo					UFRJ
C.(H.)	vina		C.vina.094	F	IV	Limari Prov., Chañar	-30.2804	-70.6402	1564	4	ix				2004	L. Packer					PCYU
C.(H.)	vina		C.vina.095	F	IV	Limari Prov., Chañar	-30.2804	-70.6402	1564	4	ix				2004	L. Packer					PCYU
C.(H.)	vina		C.vina.096	F	IV	Limari Prov., Chañar	-30.2804	-70.6402	1564	4	ix				2004	L. Packer					PCYU
C.(H.)	vina		C.vina.097	F	IV	Limari Prov., Chañar	-30.2804	-70.6402	1564	4	ix				2004	L. Packer					PCYU
C.(H.)	vina		C.vina.098	F	IV	Limarí Prov. Las Mollacas, E Monte Patria	-30.7535	-70.6573	1142	13	x				1994	Rozen, Quinter, Ascher	Oxalis				AMNH
C.(H.)	vina		C.vina.099	F	IV	Limarí Prov. Las Mollacas, E Monte Patria	-30.7535	-70.6573	1142	13	x				1994	Rozen, Quinter, Ascher	Oxalis				AMNH
C.(H.)	vina		C.vina.100	F	IV	Limarí Prov. Las Mollacas, E Monte Patria	-30.7535	-70.6573	1142	13	x				1994	Rozen, Quinter, Ascher	Oxalis				AMNH
C.(H.)	vina		C.vina.101	F	IV	Limarí Prov. Las Mollacas, E Monte Patria	-30.7535	-70.6573	1142	13	x				1994	Rozen, Quinter, Ascher	Oxalis				AMNH
C.(H.)	vina		C.vina.102	F	IV	Limarí Prov. Las Mollacas, E Monte Patria	-30.7535	-70.6573	1142	13	x				1994	Rozen, Quinter, Ascher	Oxalis				AMNH
C.(H.)	vina		C.vina.103	F	IV	Limarí Prov. Las Mollacas, E Monte Patria	-30.7535	-70.6573	1142	13	x				1994	Rozen, Quinter, Ascher	Oxalis				AMNH
C.(H.)	vina		C.vina.104	F	IV	Limarí Prov. Las Mollacas, E Monte Patria	-30.7535	-70.6573	1142	13	x				1994	Rozen, Quinter, Ascher	Oxalis				AMNH
C.(H.)	vina		C.vina.105	F	IV	Limarí Prov. Las Mollacas, E Monte Patria	-30.7535	-70.6573	1142	13	x				1994	Rozen, Quinter, Ascher	Oxalis				AMNH
C.(H.)	vina		C.vina.106	F	IV	Limarí Prov. Las Mollacas, E Monte Patria	-30.7535	-70.6573	1142	13	x				1994	Rozen, Quinter, Ascher	Oxalis				AMNH
C.(H.)	vina		C.vina.107	F	IV	Elqui Prov. Pisco Elqui	-30.1216	-70.4931	1247	6	x				1994	Rozen, Quinter, Ascher					AMNH
C.(H.)	vina		C.vina.108	F	IV	Elqui Prov. Pisco Elqui	-30.1216	-70.4931	1247	6	x				1994	Rozen, Quinter, Ascher					AMNH
C.(H.)	vina		C.vina.109	F	IV	Elqui Prov. Pisco Elqui	-30.1216	-70.4931	1247	6	x				1994	Rozen, Quinter, Ascher					AMNH
C.(H.)	vina		C.vina.110	F	IV	Elqui Prov. Pisco Elqui	-30.1216	-70.4931	1247	6	x				1994	Rozen, Quinter, Ascher					AMNH
C.(H.)	vina		C.vina.111	F	IV	Elqui Prov. Pisco Elqui	-30.1216	-70.4931	1247	6	x				1994	Rozen, Quinter, Ascher					AMNH
C.(H.)	vina		C.vina.112	F	IV	Limari Prov., Chañar	-30.2804	-70.6402	1520	11	ix		30		2004	A. Ugarte					PCYU
C.(H.)	vina		C.vina.113	F	IV	Elqui Prov., Pangue	-30.1539	-70.6639	1686	11	ix		30		2004	A. Ugarte					PCYU
C.(H.)	vina		C.vina.114	F	IV	Elqui Prov., Pangue	-30.1539	-70.6639	1686	11	ix		30		2004	A. Ugarte					PCYU
C.(H.)	vina		C.vina.115	F	IV	Elqui Prov., Pangue	-30.1539	-70.6639	1686	11	ix		30		2004	A. Ugarte					PCYU
C.(H.)	vina		C.vina.116	F	IV	Limari Prov., Chañar	-30.2804	-70.6402	1520	11	ix		30		2004	A. Ugarte					PCYU
C.(H.)	vina		C.vina.117	F	IV	Elqui Prov., Pangue	-30.1539	-70.6639	1686	11	ix		30		2004	A. Ugarte					PCYU
C.(H.)	vina		C.vina.118	F	IV	Limari Prov., Las Mollacas E Monte Patria	-30.7535	-70.6573	1142	13	x				1994	Rozen, Quinter, Ascher	Oxalis				AMNH
C.(H.)	vina		C.vina.119	F	IV	Limari Prov. Embalse Recoleta, 21 km NE Ovalle	-30.4946	-71.0855	406	11	x		12		1994	Rozen, Quinter, Ascher					AMNH
C.(H.)	vina		C.vina.120	F	IV	Elqui Prov. 26 km S of Vicuña	-30.1903	-70.6608	1691	5	x				1994	Rozen, Quinter, Ascher					AMNH
C.(H.)	vina		C.vina.121	F	IV	Limarí Prov. Las Mollacas, E Monte Patria	-30.7535	-70.6573	1142	13	x				1994	Rozen, Quinter, Ascher	Oxalis				AMNH
C.(H.)	vina		C.vina.122	F	V	Pr. Aconcagua, Papudo/Zapallar					i				1973	A.R. Moldenke				45330 INT BIOL Program	AMNH
C.(H.)	vina		C.vina.123	F	IV	Limarí Prov. Las Mollacas, E Monte Patria	-30.7535	-70.6573	1142	13	x				1994	Rozen, Quinter, Ascher	Oxalis				AMNH
C.(H.)	vina		C.vina.124	F	IV	Limarí Prov. Las Mollacas, E Monte Patria	-30.7535	-70.6573	1142	13	x				1994	Rozen, Quinter, Ascher	Oxalis				AMNH
C.(H.)	vina		C.vina.125	F	IV	Limarí Prov. Las Mollacas, E Monte Patria	-30.7535	-70.6573	1142	13	x				1994	Rozen, Quinter, Ascher	Oxalis				AMNH
C.(H.)	vina		C.vina.126	F	IV	Elqui Prov. 14 km S of Pisco Elqui	-30.2297	-70.4954	1733	6	x				1994	Rozen, Quinter, Ascher					AMNH
