# Supplementary material for: How many bee species are there? A quantitative global estimate
Source: Research Square preprint supplement (doi:10.21203/rs.3.rs-6372769/v1), 2025-06-19
Supplement: Supplementary file 5 [file correlates table.xlsx]

## Sheet: Sheet1
iChao correlates with estimated number of new species
Linear	mixed	model	fit	by	REML.	t-tests	use	Satterthwaite's	method	['lmerModLmerTest']
Formula:	log(iChao_increase)	~	log(GPD_per_cap)	+	log(percent_ed)	+	log(median_roadDist)	+
	log(elevationalRange)	+	log(observedRichness)	+	log(cleanRecords)	*	log(propOccurrences)	+	(1	|	continent)
	Data:	combined_explanatory
REML	criterion	at	convergence:	201.5
Scaled	residuals:
	Min	1Q	Median	3Q	Max
-3.2096	-0.429	-0.0701	0.4805	5.8089
Random	effects:
	Groups	Name	Variance	Std.Dev.
	continent	(Intercept)	0.02213	0.1488
	Residual	0.20666	0.4546
Number	of	obs:	131,	groups:	continent,	6
Fixed	effects:
	Estimate	Std.	Error	df	t	value	Pr(>|t|)
(Intercept)	1.05065	0.754484	122	1.393	0.1663
log(GPD_per_cap)	-0.05894	0.066621	121.111	-0.885	0.3781
log(percent_ed)	0.056657	0.053143	121.511	1.066	0.2885
log(median_roadDist)	-0.047353	0.057465	118.418	-0.824	0.4116
log(elevationalRange)	-0.005665	0.057843	119.645	-0.098	0.9221
log(observedRichness)	1.25795	0.070548	121.633	17.831	<2.00E-16	***
log(cleanRecords)	-0.321645	0.042543	121.096	-7.56	8.56e-12	***
log(propOccurrences)	0.534283	0.11703	119.006	4.565	1.22e-05	***
log(cleanRecords):log(propOccurrences)	-0.059785	0.023069	121.999	-2.592	0.0107	*
---
Signif.	codes:	0	‘***’	0.001	‘**’	0.01	‘*’	0.05	‘.’	0.1	‘	’	1
iChao correlates with estimated percentage of new species
Linear	mixed	model	fit	by	REML.	t-tests	use	Satterthwaite's	method	['lmerModLmerTest']
Formula:	log(iChao_increasePercent)	~	log(GPD_per_cap)	+	log(percent_ed)	+
	log(median_roadDist)	+	log(elevationalRange)	+	log(observedRichness)	+
	log(cleanRecords)	*	log(propOccurrences)	+	(1	|	continent)
	Data:	combined_explanatory
REML	criterion	at	convergence:	99
Scaled	residuals:
	Min	1Q	Median	3Q	Max
-4.0585	-0.4411	0.0082	0.5456	2.8942
Random	effects:
	Groups	Name	Variance	Std.Dev.
	continent	(Intercept)	0.01901	0.1379
	Residual	0.0876	0.296
Number	of	obs:	131,	groups:	continent,	6
Fixed	effects:
	Estimate	Std.	Error	df	t	value	Pr(>|t|)
(Intercept)	4.30824	0.49537	121.915	8.697	1.92e-14	***
log(GPD_per_cap)	-0.01269	0.04381	121.875	-0.29	0.77264
log(percent_ed)	0.01952	0.03478	120.246	0.561	0.57569
log(median_roadDist)	-0.04041	0.03791	121.873	-1.066	0.28862
log(elevationalRange)	0.01616	0.03808	121.908	0.424	0.67211
log(observedRichness)	0.21222	0.04637	121.888	4.577	1.15e-05	***
log(cleanRecords)	-0.2451	0.02783	120.462	-8.806	1.15e-14	***
log(propOccurrences)	0.38831	0.07635	118.43	5.086	1.39e-06	***
log(cleanRecords):log(propOccurrences)	-0.05	0.01512	121.044	-3.306	0.00125	**
---
Signif.	codes:	0	‘***’	0.001	‘**’	0.01	‘*’	0.05	‘.’	0.1	‘	’	1
